# Supplementary material for: Do Peers See More in a Paper Than Its Authors?
Source: Hindawi journal article supplement (doi:10.1155/2012/750214), 2012-11-27
Supplement: f3 [file 750214.f3.pdf]

## 1. Annotation Categories

| Categories         | Description                    | Examples                            | MeSH Tree IDs                      |
|--------------------|--------------------------------|-------------------------------------|------------------------------------|
| E (entities)       | genes & proteins               | MCM, protein, ORC, Skp2             | D06, D08, D12, D23.529             |
| F (function)       | biological function or process | Regulation, pathway, function       | G, F01, F02                        |
| D (dependency)     | relationship type              | involve, cause                      | N/A                                |
| X (characteristic) | modifier                       | unstable, common, ionizing          | N/A                                |
| L (location)       | cellular or molecular part     | C-terminal, cytosol, motif          | A                                  |
| S (species)        | any taxonomic description      | human, mammal, <i>S. cerevisiae</i> | B                                  |
| T (time)           | temporal information           | during, after, following            | N/A                                |
| M (exp methods)    | methods & their components     | recombination, tranfect             | E                                  |
| H (chemicals)      | not including genes/proteins   | DNA, thymidine, phosphoryl          | D (except: D06, D08, D12, D23.529) |
| R (disorders)      | names & associated terms       | cancer, tumor, patient              | C, F03                             |

## MeSH Tree Structures - 2009

1. Anatomy [A]
2. Organisms [B]
3. Diseases [C]
4. Chemicals and Drugs [D]
5. Analytical, Diagnostic and Therapeutic Techniques and Equipment [E]
6. Psychiatry and Psychology [F]
7. Phenomena and Processes [G]
8. Disciplines and Occupations [H]
9. Anthropology, Education, Sociology and Social Phenomena [I]
10. Technology, Industry, Agriculture [J]
11. Humanities [K]
12. Information Science [L]
13. Named Groups [M]
14. Health Care [N]
15. Publication Characteristics [V]
16. Geographicals [Z]

\* Inorganic Chemicals [D01] +

## Closer Manual Category

- L (location)  
S (species)  
R (disorders)  
\* H (chemicals) & E (entities)  
M (exp methods)  
\*\* F (function) & R (disorders)  
F (function)  
N/A  
N/A  
N/A  
N/A  
N/A  
N/A  
N/A  
N/A  
N/A

H (chemicals)

|                                                                |               |
|----------------------------------------------------------------|---------------|
| Organic Chemicals [D02] +                                      | H (chemicals) |
| Heterocyclic Compounds [D03] +                                 | H (chemicals) |
| Polycyclic Compounds [D04] +                                   | H (chemicals) |
| Macromolecular Substances [D05] +                              | H (chemicals) |
| Hormones, Hormone Substitutes, and Hormone Antagonists [D06] + | E (entities)  |
| Enzymes and Coenzymes [D08] +                                  | E (entities)  |
| Carbohydrates [D09] +                                          | H (chemicals) |
| Lipids [D10] +                                                 | H (chemicals) |
| Amino Acids, Peptides, and Proteins [D12] +                    | E (entities)  |
| Nucleic Acids, Nucleotides, and Nucleosides [D13] +            | H (chemicals) |
| Complex Mixtures [D20] +                                       | H (chemicals) |
| Biological Factors [D23] +                                     |               |
| Antigens [D23.050] +                                           | H (chemicals) |
| Biological Markers [D23.101] +                                 | H (chemicals) |
| Blood Coagulation Factor Inhibitors [D23.113] +                | H (chemicals) |
| Blood Coagulation Factors [D23.119] +                          | H (chemicals) |
| Chemotactic Factors [D23.125] +                                | H (chemicals) |
| Inflammation Mediators [D23.469] +                             | H (chemicals) |
| Intercellular Signaling Peptides and Proteins [D23.529] +      | E (entities)  |
| Pheromones [D23.641] +                                         | H (chemicals) |
| Pigments, Biological [D23.767] +                               | H (chemicals) |
| Toxins, Biological [D23.946] +                                 | H (chemicals) |
| Biomedical and Dental Materials [D25] +                        | H (chemicals) |
| Pharmaceutical Preparations [D26] +                            | H (chemicals) |
| Chemical Actions and Uses [D27] +                              | H (chemicals) |

|                                               |               |
|-----------------------------------------------|---------------|
| ** Behavior and Behavior Mechanisms [F01] +   | F (function)  |
| Psychological Phenomena and Processes [F02] + | F (function)  |
| Mental Disorders [F03] +                      | R (disorders) |
| Behavioral Disciplines and Activities [F04] + | N/A           |

## 2. Counts Summary

Looking at all abstracts, the following unique IDs where found (first row -> number, second row -> %):

Total number of unique annotations = 2829

| A    | B    | C    | D     | Dchem | Dent  | E    | F    | Ffunc | Fdis | G     | H    | I    | J    | K    | L    | M    | N    | V    | Z    |
|------|------|------|-------|-------|-------|------|------|-------|------|-------|------|------|------|------|------|------|------|------|------|
| 228  | 259  | 51   | 673   | 195   | 478   | 65   | 153  | 127   | 4    | 1088  | 74   | 72   | 10   | 0    | 18   | 2    | 107  | 29   | 0    |
| 8.06 | 9.16 | 1.80 | 23.79 | 6.89  | 16.90 | 5.41 | 5.41 | 4.49  | 0.14 | 38.46 | 2.62 | 2.55 | 0.35 | 0.00 | 0.64 | 0.07 | 3.78 | 1.03 | 0.00 |

Looking at all citances, the following unique IDs where found (first row -> number, second row -> %):

Total number of unique annotations = 17233

| A    | B    | C    | D     | Dchem | Dent  | E    | F    | Ffunc | Fdis | G     | H    | I    | J    | K    | L    | M    | N    | V    | Z    |
|------|------|------|-------|-------|-------|------|------|-------|------|-------|------|------|------|------|------|------|------|------|------|
| 1529 | 1162 | 498  | 4593  | 1829  | 2764  | 1001 | 962  | 858   | 26   | 4659  | 797  | 440  | 152  | 35   | 381  | 106  | 711  | 169  | 38   |
| 8.87 | 6.74 | 2.89 | 26.65 | 10.61 | 16.04 | 5.58 | 5.58 | 4.98  | 0.15 | 27.04 | 4.62 | 2.55 | 0.88 | 0.20 | 2.21 | 0.62 | 4.13 | 0.98 | 0.22 |

Abstracts and citances have the following unique IDs in common (first row -> number, second row -> %):

Total number of unique annotations = 2197

| A    | B    | C    | D     | Dchem | Dent  | E    | F    | Ffunc | Fdis | G     | H    | I    | J    | K    | L    | M    | N    | V    | Z    |
|------|------|------|-------|-------|-------|------|------|-------|------|-------|------|------|------|------|------|------|------|------|------|
| 168  | 212  | 47   | 494   | 145   | 349   | 38   | 101  | 83    | 1    | 911   | 54   | 53   | 6    | 0    | 12   | 2    | 75   | 24   | 0    |
| 7.65 | 9.65 | 2.14 | 22.49 | 6.60  | 15.89 | 4.60 | 4.60 | 3.78  | 0.05 | 41.47 | 2.46 | 2.41 | 0.27 | 0.00 | 0.55 | 0.09 | 3.41 | 1.09 | 0.00 |

Unique IDs found in abstracts but not in citances (first row -> number, second row -> %):

Total number of unique annotations = 632

| A    | B    | C    | D     | Dchem | Dent  | E    | F    | Ffunc | Fdis | G     | H    | I    | J    | K    | L    | M    | N    | V    | Z    |
|------|------|------|-------|-------|-------|------|------|-------|------|-------|------|------|------|------|------|------|------|------|------|
| 60   | 47   | 4    | 179   | 50    | 129   | 27   | 52   | 44    | 3    | 177   | 20   | 19   | 4    | 0    | 6    | 0    | 32   | 5    | 0    |
| 9.49 | 7.44 | 0.63 | 28.32 | 7.91  | 20.41 | 8.23 | 8.23 | 6.96  | 0.47 | 28.01 | 3.16 | 3.01 | 0.63 | 0.00 | 0.95 | 0.00 | 5.06 | 0.79 | 0.00 |

Unique IDs found in citances but not in abstracts (first row -> number, second row -> %):

Total number of unique annotations = 15036

| A    | B    | C    | D     | Dchem | Dent  | E    | F    | Ffunc | Fdis | G     | H    | I    | J    | K    | L    | M    | N    | V    | Z    |
|------|------|------|-------|-------|-------|------|------|-------|------|-------|------|------|------|------|------|------|------|------|------|
| 1361 | 950  | 451  | 4099  | 1684  | 2415  | 963  | 861  | 775   | 25   | 3748  | 743  | 387  | 146  | 35   | 369  | 104  | 636  | 145  | 38   |
| 9.05 | 6.32 | 3.00 | 27.26 | 11.20 | 16.06 | 5.73 | 5.73 | 5.15  | 0.17 | 24.93 | 4.94 | 2.57 | 0.97 | 0.23 | 2.45 | 0.69 | 4.23 | 0.96 | 0.25 |

Looking at all abstracts, the following truncated to max 2 levels unique IDs where found (first row -> number, second row -> %):

Total number of unique annotations = 1924

| A     | B     | C    | D     | Dchem | Dent  | E    | F    | Ffunc | Fdis | G     | H    | I    | J    | K    | L    | M    | N    | V    | Z    |
|-------|-------|------|-------|-------|-------|------|------|-------|------|-------|------|------|------|------|------|------|------|------|------|
| 193   | 200   | 51   | 351   | 156   | 195   | 57   | 150  | 124   | 4    | 630   | 68   | 66   | 10   | 0    | 16   | 2    | 101  | 29   | 0    |
| 10.03 | 10.40 | 2.65 | 18.24 | 8.11  | 10.14 | 7.80 | 7.80 | 6.44  | 0.21 | 32.74 | 3.53 | 3.43 | 0.52 | 0.00 | 0.83 | 0.10 | 5.25 | 1.51 | 0.00 |

Looking at all citances, the following truncated to max 2 levels unique IDs where found (first row -> number, second row -> %):

Total number of unique annotations = 7862

| A     | B    | C    | D     | Dchem | Dent | E    | F    | Ffunc | Fdis | G     | H    | I    | J    | K    | L    | M    | N    | V    | Z    |
|-------|------|------|-------|-------|------|------|------|-------|------|-------|------|------|------|------|------|------|------|------|------|
| 860   | 534  | 385  | 1463  | 1149  | 314  | 600  | 635  | 537   | 26   | 1535  | 411  | 247  | 122  | 32   | 227  | 106  | 508  | 169  | 28   |
| 10.94 | 6.79 | 4.90 | 18.61 | 14.61 | 3.99 | 8.08 | 8.08 | 6.83  | 0.33 | 19.52 | 5.23 | 3.14 | 1.55 | 0.41 | 2.89 | 1.35 | 6.46 | 2.15 | 0.36 |

Abstracts and citances have the following truncated to max 2 levels unique IDs in common (first row -> number, second row -> %):

Total number of unique annotations = 1613

| A    | B     | C    | D     | Dchem | Dent  | E    | F    | Ffunc | Fdis | G     | H    | I    | J    | K    | L    | M    | N    | V    | Z    |
|------|-------|------|-------|-------|-------|------|------|-------|------|-------|------|------|------|------|------|------|------|------|------|
| 154  | 176   | 47   | 301   | 126   | 175   | 40   | 112  | 94    | 1    | 555   | 55   | 56   | 7    | 0    | 10   | 2    | 74   | 24   | 0    |
| 9.55 | 10.91 | 2.91 | 18.66 | 7.81  | 10.85 | 6.94 | 6.94 | 5.83  | 0.06 | 34.41 | 3.41 | 3.47 | 0.43 | 0.00 | 0.62 | 0.12 | 4.59 | 1.49 | 0.00 |

Unique IDs (truncated to max 2 levels) found in abstracts but not in citances (first row -> number, second row -> %):

Total number of unique annotations = 311

| A     | B    | C    | D     | Dchem | Dent | E     | F     | Ffunc | Fdis | G     | H    | I    | J    | K    | L    | M    | N    | V    | Z    |
|-------|------|------|-------|-------|------|-------|-------|-------|------|-------|------|------|------|------|------|------|------|------|------|
| 39    | 24   | 4    | 50    | 30    | 20   | 17    | 38    | 30    | 3    | 75    | 13   | 10   | 3    | 0    | 6    | 0    | 27   | 5    | 0    |
| 12.54 | 7.72 | 1.29 | 16.08 | 9.65  | 6.43 | 12.22 | 12.22 | 9.65  | 0.96 | 24.12 | 4.18 | 3.22 | 0.96 | 0.00 | 1.93 | 0.00 | 8.68 | 1.61 | 0.00 |

Unique IDs (truncated to max 2 levels) found in citances but not in abstracts (first row -> number, second row -> %):

Total number of unique annotations = 6249

| A     | B    | C    | D     | Dchem | Dent | E    | F    | Ffunc | Fdis | G     | H    | I    | J    | K    | L    | M    | N    | V    | Z    |
|-------|------|------|-------|-------|------|------|------|-------|------|-------|------|------|------|------|------|------|------|------|------|
| 706   | 358  | 338  | 1162  | 1023  | 139  | 560  | 523  | 443   | 25   | 980   | 356  | 191  | 115  | 32   | 217  | 104  | 434  | 145  | 28   |
| 11.30 | 5.73 | 5.41 | 18.59 | 16.37 | 2.22 | 8.37 | 8.37 | 7.09  | 0.40 | 15.68 | 5.70 | 3.06 | 1.84 | 0.51 | 3.47 | 1.66 | 6.95 | 2.32 | 0.45 |

### 3. Counts Summary for 0-adjointing-citances and abstracts

Looking at all abstracts, the following unique IDs where found (first row -> number, second row -> %):

Total number of unique annotations = 2829

| A    | B    | C    | D     | Dchem | Dent  | E    | F    | Ffunc | Fdis | G     | H    | I    | J    | K    | L    | M    | N    | V    | Z    |
|------|------|------|-------|-------|-------|------|------|-------|------|-------|------|------|------|------|------|------|------|------|------|
| 228  | 259  | 51   | 673   | 195   | 478   | 65   | 153  | 127   | 4    | 1088  | 74   | 72   | 10   | 0    | 18   | 2    | 107  | 29   | 0    |
| 8.06 | 9.16 | 1.80 | 23.79 | 6.89  | 16.90 | 5.41 | 5.41 | 4.49  | 0.14 | 38.46 | 2.62 | 2.55 | 0.35 | 0.00 | 0.64 | 0.07 | 3.78 | 1.03 | 0.00 |

Looking at all citances with 0 adjoining citations, the following unique IDs where found (first row -> number, second row -> %):

Total number of unique annotations = 6014

| A    | B    | C    | D     | Dchem | Dent  | E    | F    | Ffunc | Fdis | G     | H    | I    | J    | K    | L    | M    | N    | V    | Z    |
|------|------|------|-------|-------|-------|------|------|-------|------|-------|------|------|------|------|------|------|------|------|------|
| 556  | 315  | 143  | 1529  | 655   | 874   | 369  | 305  | 264   | 8    | 1817  | 310  | 169  | 40   | 4    | 118  | 25   | 252  | 48   | 14   |
| 9.25 | 5.24 | 2.38 | 25.42 | 10.89 | 14.53 | 5.07 | 5.07 | 4.39  | 0.13 | 30.21 | 5.15 | 2.81 | 0.67 | 0.07 | 1.96 | 0.42 | 4.19 | 0.80 | 0.23 |

Abstracts and citances with 0 adjoining citations have the following unique IDs in common (first row -> number, second row -> %):

Total number of unique annotations = 1491

| A    | B    | C    | D     | Dchem | Dent  | E    | F    | Ffunc | Fdis | G     | H    | I    | J    | K    | L    | M    | N    | V    | Z    |
|------|------|------|-------|-------|-------|------|------|-------|------|-------|------|------|------|------|------|------|------|------|------|
| 136  | 129  | 32   | 332   | 99    | 233   | 26   | 62   | 47    | 0    | 615   | 42   | 36   | 4    | 0    | 5    | 0    | 53   | 19   | 0    |
| 9.12 | 8.65 | 2.15 | 22.27 | 6.64  | 15.63 | 4.16 | 4.16 | 3.15  | 0.00 | 41.25 | 2.82 | 2.41 | 0.27 | 0.00 | 0.34 | 0.00 | 3.55 | 1.27 | 0.00 |

Unique IDs found in abstracts but not in citances with 0 adjoining citations (first row -> number, second row -> %):

Total number of unique annotations = 1338

| A    | B    | C    | D     | Dchem | Dent  | E    | F    | Ffunc | Fdis | G     | H    | I    | J    | K    | L    | M    | N    | V    | Z    |
|------|------|------|-------|-------|-------|------|------|-------|------|-------|------|------|------|------|------|------|------|------|------|
| 92   | 130  | 19   | 341   | 96    | 245   | 39   | 91   | 80    | 4    | 473   | 32   | 36   | 6    | 0    | 13   | 2    | 54   | 10   | 0    |
| 6.88 | 9.72 | 1.42 | 25.49 | 7.17  | 18.31 | 6.80 | 6.80 | 5.98  | 0.30 | 35.35 | 2.39 | 2.69 | 0.45 | 0.00 | 0.97 | 0.15 | 4.04 | 0.75 | 0.00 |

Unique IDs found in citances with 0 adjoining citations but not in abstracts (first row -> number, second row -> %):

Total number of unique annotations = 4523

| A    | B    | C    | D     | Dchem | Dent  | E    | F    | Ffunc | Fdis | G     | H    | I    | J    | K    | L    | M    | N    | V    | Z    |
|------|------|------|-------|-------|-------|------|------|-------|------|-------|------|------|------|------|------|------|------|------|------|
| 420  | 186  | 111  | 1197  | 556   | 641   | 343  | 243  | 217   | 8    | 1202  | 268  | 133  | 36   | 4    | 113  | 25   | 199  | 29   | 14   |
| 9.29 | 4.11 | 2.45 | 26.46 | 12.29 | 14.17 | 5.37 | 5.37 | 4.80  | 0.18 | 26.58 | 5.93 | 2.94 | 0.80 | 0.09 | 2.50 | 0.55 | 4.40 | 0.64 | 0.31 |

Looking at all abstracts, the following truncated to max 2 levels unique IDs where found (first row -> number, second row -> %):

Total number of unique annotations = 1924

| A     | B     | C    | D     | Dchem | Dent  | E    | F    | Ffunc | Fdis | G     | H    | I    | J    | K    | L    | M    | N    | V    | Z    |
|-------|-------|------|-------|-------|-------|------|------|-------|------|-------|------|------|------|------|------|------|------|------|------|
| 193   | 200   | 51   | 351   | 156   | 195   | 57   | 150  | 124   | 4    | 630   | 68   | 66   | 10   | 0    | 16   | 2    | 101  | 29   | 0    |
| 10.03 | 10.40 | 2.65 | 18.24 | 8.11  | 10.14 | 7.80 | 7.80 | 6.44  | 0.21 | 32.74 | 3.53 | 3.43 | 0.52 | 0.00 | 0.83 | 0.10 | 5.25 | 1.51 | 0.00 |

Looking at all citances with 0 adjoining citations, the following truncated to max 2 levels unique IDs where found (first row -> number, second row -> %):

Total number of unique annotations = 3523

| A     | B    | C    | D     | Dchem | Dent | E    | F    | Ffunc | Fdis | G     | H    | I    | J    | K    | L    | M    | N    | V    | Z    |
|-------|------|------|-------|-------|------|------|------|-------|------|-------|------|------|------|------|------|------|------|------|------|
| 378   | 217  | 132  | 716   | 496   | 220  | 252  | 248  | 208   | 8    | 855   | 200  | 115  | 36   | 3    | 81   | 25   | 206  | 48   | 11   |
| 10.73 | 6.16 | 3.75 | 20.32 | 14.08 | 6.24 | 7.04 | 7.04 | 5.90  | 0.23 | 24.27 | 5.68 | 3.26 | 1.02 | 0.09 | 2.30 | 0.71 | 5.85 | 1.36 | 0.31 |

Abstracts and citances with 0 adjoining citations have the following truncated to max 2 levels unique IDs in common (first row -> number, second row -> %):

Total number of unique annotations = 1234

| A     | B     | C    | D     | Dchem | Dent  | E    | F    | Ffunc | Fdis | G     | H    | I    | J    | K    | L    | M    | N    | V    | Z    |
|-------|-------|------|-------|-------|-------|------|------|-------|------|-------|------|------|------|------|------|------|------|------|------|
| 131   | 127   | 33   | 239   | 90    | 149   | 31   | 71   | 56    | 0    | 436   | 43   | 39   | 4    | 0    | 5    | 0    | 56   | 19   | 0    |
| 10.62 | 10.29 | 2.67 | 19.37 | 7.29  | 12.07 | 5.75 | 5.75 | 4.54  | 0.00 | 35.33 | 3.48 | 3.16 | 0.32 | 0.00 | 0.41 | 0.00 | 4.54 | 1.54 | 0.00 |

Unique IDs (truncated to max 2 levels) found in abstracts but not in citances with 0 adjoining citations (first row -> number, second row -> %):

Total number of unique annotations = 690

| A    | B     | C    | D     | Dchem | Dent | E     | F     | Ffunc | Fdis | G     | H    | I    | J    | K    | L    | M    | N    | V    | Z    |
|------|-------|------|-------|-------|------|-------|-------|-------|------|-------|------|------|------|------|------|------|------|------|------|
| 62   | 73    | 18   | 112   | 66    | 46   | 26    | 79    | 68    | 4    | 194   | 25   | 27   | 6    | 0    | 11   | 2    | 45   | 10   | 0    |
| 8.99 | 10.58 | 2.61 | 16.23 | 9.57  | 6.67 | 11.45 | 11.45 | 9.86  | 0.58 | 28.12 | 3.62 | 3.91 | 0.87 | 0.00 | 1.59 | 0.29 | 6.52 | 1.45 | 0.00 |

Unique IDs (truncated to max 2 levels) found in citances with 0 adjoining citations but not in abstracts (first row -> number, second row -> %):

Total number of unique annotations = 2289

| A     | B    | C    | D     | Dchem | Dent | E    | F    | Ffunc | Fdis | G     | H    | I    | J    | K    | L    | M    | N    | V    | Z    |
|-------|------|------|-------|-------|------|------|------|-------|------|-------|------|------|------|------|------|------|------|------|------|
| 247   | 90   | 99   | 477   | 406   | 71   | 221  | 177  | 152   | 8    | 419   | 157  | 76   | 32   | 3    | 76   | 25   | 150  | 29   | 11   |
| 10.79 | 3.93 | 4.33 | 20.84 | 17.74 | 3.10 | 7.73 | 7.73 | 6.64  | 0.35 | 18.30 | 6.86 | 3.32 | 1.40 | 0.13 | 3.32 | 1.09 | 6.55 | 1.27 | 0.48 |

#### 4. Counts Summary for year/time effect considering MeSH treeIDs

Looking at all abstracts, the following unique IDs where found (first row -> number, second row -> %):

Total number of unique annotations = 2829

| A    | B    | C    | D     | Dchem | Dent  | E    | F    | Ffunc | Fdis | G     | H    | I    | J    | K    | L    | M    | N    | V    | Z    |
|------|------|------|-------|-------|-------|------|------|-------|------|-------|------|------|------|------|------|------|------|------|------|
| 228  | 259  | 51   | 673   | 195   | 478   | 65   | 153  | 127   | 4    | 1088  | 74   | 72   | 10   | 0    | 18   | 2    | 107  | 29   | 0    |
| 8.06 | 9.16 | 1.80 | 23.79 | 6.89  | 16.90 | 5.41 | 5.41 | 4.49  | 0.14 | 38.46 | 2.62 | 2.55 | 0.35 | 0.00 | 0.64 | 0.07 | 3.78 | 1.03 | 0.00 |

Looking at all citances appeared in year0 (same year as abstract), the following unique IDs where found (first row -> number, second row -> %):

Total number of unique annotations = 1131

| A     | B    | C    | D     | Dchem | Dent  | E    | F    | Ffunc | Fdis | G     | H    | I    | J    | K    | L    | M    | N    | V    | Z    |
|-------|------|------|-------|-------|-------|------|------|-------|------|-------|------|------|------|------|------|------|------|------|------|
| 125   | 90   | 29   | 288   | 113   | 175   | 49   | 85   | 69    | 0    | 289   | 61   | 31   | 4    | 3    | 21   | 4    | 42   | 9    | 1    |
| 11.05 | 7.96 | 2.56 | 25.46 | 9.99  | 15.47 | 7.52 | 7.52 | 6.10  | 0.00 | 25.55 | 5.39 | 2.74 | 0.35 | 0.27 | 1.86 | 0.35 | 3.71 | 0.80 | 0.09 |

Looking at all citances appeared in year1 (1 year after the abstract), the following unique NEW IDs where found (first row -> number, second row -> %):

Total number of unique annotations = 3624

| A    | B    | C    | D     | Dchem | Dent  | E    | F    | Ffunc | Fdis | G     | H    | I    | J    | K    | L    | M    | N    | V    | Z    |
|------|------|------|-------|-------|-------|------|------|-------|------|-------|------|------|------|------|------|------|------|------|------|
| 286  | 283  | 98   | 760   | 337   | 423   | 193  | 202  | 174   | 7    | 1217  | 152  | 95   | 19   | 9    | 86   | 21   | 146  | 52   | 5    |
| 7.89 | 7.81 | 2.70 | 20.97 | 9.30  | 11.67 | 5.57 | 5.57 | 4.80  | 0.19 | 33.58 | 4.19 | 2.62 | 0.52 | 0.25 | 2.37 | 0.58 | 4.03 | 1.43 | 0.14 |

Looking at all citances appeared in year2 (2 years after the abstract), the following unique NEW IDs where found (first row -> number, second row -> %):

Total number of unique annotations = 2866

| A    | B    | C    | D     | Dchem | Dent  | E    | F    | Ffunc | Fdis | G     | H    | I    | J    | K    | L    | M    | N    | V    | Z    |
|------|------|------|-------|-------|-------|------|------|-------|------|-------|------|------|------|------|------|------|------|------|------|
| 181  | 215  | 95   | 657   | 343   | 314   | 220  | 212  | 193   | 7    | 701   | 144  | 110  | 32   | 10   | 83   | 22   | 152  | 30   | 2    |
| 6.32 | 7.50 | 3.31 | 22.92 | 11.97 | 10.96 | 7.40 | 7.40 | 6.73  | 0.24 | 24.46 | 5.02 | 3.84 | 1.12 | 0.35 | 2.90 | 0.77 | 5.30 | 1.05 | 0.07 |

Looking at all citances appeared in year3 (3 years after the abstract), the following unique NEW IDs where found (first row -> number, second row -> %):

Total number of unique annotations = 1946

| A    | B    | C    | D     | Dchem | Dent | E    | F    | Ffunc | Fdis | G     | H    | I    | J    | K    | L    | M    | N    | V    | Z    |
|------|------|------|-------|-------|------|------|------|-------|------|-------|------|------|------|------|------|------|------|------|------|
| 84   | 143  | 90   | 455   | 291   | 164  | 176  | 135  | 119   | 6    | 441   | 119  | 50   | 32   | 5    | 63   | 23   | 92   | 29   | 9    |
| 4.32 | 7.35 | 4.62 | 23.38 | 14.95 | 8.43 | 6.94 | 6.94 | 6.12  | 0.31 | 22.66 | 6.12 | 2.57 | 1.64 | 0.26 | 3.24 | 1.18 | 4.73 | 1.49 | 0.46 |

Looking at all citances appeared in year4+ (4+ years after the abstract), the following unique NEW IDs where found (first row -> number, second row -> %):

Total number of unique annotations = 6615

| A    | B    | C    | D     | Dchem | Dent | E    | F    | Ffunc | Fdis | G     | H    | I    | J    | K    | L    | M    | N    | V    | Z    |
|------|------|------|-------|-------|------|------|------|-------|------|-------|------|------|------|------|------|------|------|------|------|
| 355  | 504  | 195  | 1450  | 815   | 635  | 426  | 449  | 411   | 8    | 1874  | 357  | 197  | 78   | 8    | 156  | 62   | 410  | 68   | 26   |
| 5.37 | 7.62 | 2.95 | 21.92 | 12.32 | 9.60 | 6.79 | 6.79 | 6.21  | 0.12 | 28.33 | 5.40 | 2.98 | 1.18 | 0.12 | 2.36 | 0.94 | 6.20 | 1.03 | 0.39 |

Looking at all unique IDs that the abstracts and citances appeared in year0 (same year as abstract) have in common (first row -> number, second row -> %):

Total number of unique annotations = 419

| A    | B    | C    | D     | Dchem | Dent  | E    | F    | Ffunc | Fdis | G     | H    | I    | J    | K    | L    | M    | N    | V    | Z    |
|------|------|------|-------|-------|-------|------|------|-------|------|-------|------|------|------|------|------|------|------|------|------|
| 37   | 41   | 7    | 98    | 31    | 67    | 4    | 20   | 16    | 0    | 168   | 16   | 9    | 1    | 0    | 0    | 1    | 12   | 5    | 0    |
| 8.83 | 9.79 | 1.67 | 23.39 | 7.40  | 15.99 | 4.77 | 4.77 | 3.82  | 0.00 | 40.10 | 3.82 | 2.15 | 0.24 | 0.00 | 0.00 | 0.24 | 2.86 | 1.19 | 0.00 |

Looking at all NEW unique IDs that the abstracts and citances appeared in year1 (1 year after the abstract) have in common (first row -> number, second row -> %):

Total number of unique annotations = 807

| A    | B     | C    | D     | Dchem | Dent  | E    | F    | Ffunc | Fdis | G     | H    | I    | J    | K    | L    | M    | N    | V    | Z    |
|------|-------|------|-------|-------|-------|------|------|-------|------|-------|------|------|------|------|------|------|------|------|------|
| 68   | 97    | 27   | 139   | 40    | 99    | 11   | 38   | 32    | 1    | 335   | 18   | 26   | 1    | 0    | 3    | 1    | 31   | 12   | 0    |
| 8.43 | 12.02 | 3.35 | 17.22 | 4.96  | 12.27 | 4.71 | 4.71 | 3.97  | 0.12 | 41.51 | 2.23 | 3.22 | 0.12 | 0.00 | 0.37 | 0.12 | 3.84 | 1.49 | 0.00 |

Looking at all NEW unique IDs that the abstracts and citances appeared in year2 (2 years after the abstract) have in common (first row -> number, second row -> %):

Total number of unique annotations = 354

| A    | B    | C    | D     | Dchem | Dent  | E    | F    | Ffunc | Fdis | G     | H    | I    | J    | K    | L    | M    | N    | V    | Z    |
|------|------|------|-------|-------|-------|------|------|-------|------|-------|------|------|------|------|------|------|------|------|------|
| 18   | 26   | 12   | 86    | 28    | 58    | 12   | 23   | 18    | 0    | 137   | 10   | 10   | 1    | 0    | 2    | 0    | 14   | 3    | 0    |
| 5.08 | 7.34 | 3.39 | 24.29 | 7.91  | 16.38 | 6.50 | 6.50 | 5.08  | 0.00 | 38.70 | 2.82 | 2.82 | 0.28 | 0.00 | 0.56 | 0.00 | 3.95 | 0.85 | 0.00 |

Looking at all NEW unique IDs that the abstracts and citances appeared in year3 (3 years after the abstract) have in common (first row -> number, second row -> %):

Total number of unique annotations = 135

| A    | B    | C    | D     | Dchem | Dent  | E    | F    | Ffunc | Fdis | G     | H    | I    | J    | K    | L    | M    | N    | V    | Z    |
|------|------|------|-------|-------|-------|------|------|-------|------|-------|------|------|------|------|------|------|------|------|------|
| 5    | 11   | 0    | 40    | 13    | 27    | 1    | 11   | 9     | 0    | 50    | 3    | 3    | 2    | 0    | 4    | 0    | 3    | 2    | 0    |
| 3.70 | 8.15 | 0.00 | 29.63 | 9.63  | 20.00 | 8.15 | 8.15 | 6.67  | 0.00 | 37.04 | 2.22 | 2.22 | 1.48 | 0.00 | 2.96 | 0.00 | 2.22 | 1.48 | 0.00 |

Looking at all NEW unique IDs that the abstracts and citances appeared in year4+ (4+ years after the abstract) have in common (first row -> number, second row -> %):

Total number of unique annotations = 225

| A    | B     | C    | D     | Dchem | Dent | E    | F    | Ffunc | Fdis | G     | H    | I    | J    | K    | L    | M    | N    | V    | Z    |
|------|-------|------|-------|-------|------|------|------|-------|------|-------|------|------|------|------|------|------|------|------|------|
| 13   | 29    | 1    | 38    | 23    | 15   | 10   | 9    | 8     | 0    | 95    | 6    | 4    | 1    | 0    | 3    | 0    | 14   | 2    | 0    |
| 5.78 | 12.89 | 0.44 | 16.89 | 10.22 | 6.67 | 4.00 | 4.00 | 3.56  | 0.00 | 42.22 | 2.67 | 1.78 | 0.44 | 0.00 | 1.33 | 0.00 | 6.22 | 0.89 | 0.00 |

## 5. Counts Summary considering year/time effect for truncated MeSH treeIDs

Looking at all abstracts, the following unique IDs where found (first row -> number, second row -> %):

Total number of unique annotations = 1924

| A     | B     | C    | D     | Dchem | Dent  | E    | F    | Ffunc | Fdis | G     | H    | I    | J    | K    | L    | M    | N    | V    | Z    |
|-------|-------|------|-------|-------|-------|------|------|-------|------|-------|------|------|------|------|------|------|------|------|------|
| 193   | 200   | 51   | 351   | 156   | 195   | 57   | 150  | 124   | 4    | 630   | 68   | 66   | 10   | 0    | 16   | 2    | 101  | 29   | 0    |
| 10.03 | 10.40 | 2.65 | 18.24 | 8.11  | 10.14 | 7.80 | 7.80 | 6.44  | 0.21 | 32.74 | 3.53 | 3.43 | 0.52 | 0.00 | 0.83 | 0.10 | 5.25 | 1.51 | 0.00 |

Looking at all citances appeared in year0 (same year as abstract), the following unique IDs where found (first row -> number, second row -> %):

Total number of unique annotations = 778

| A     | B    | C    | D     | Dchem | Dent | E    | F    | Ffunc | Fdis | G     | H    | I    | J    | K    | L    | M    | N    | V    | Z    |
|-------|------|------|-------|-------|------|------|------|-------|------|-------|------|------|------|------|------|------|------|------|------|
| 84    | 62   | 29   | 156   | 90    | 66   | 35   | 73   | 60    | 0    | 193   | 46   | 27   | 4    | 3    | 13   | 4    | 39   | 9    | 1    |
| 10.80 | 7.97 | 3.73 | 20.05 | 11.57 | 8.48 | 9.38 | 9.38 | 7.71  | 0.00 | 24.81 | 5.91 | 3.47 | 0.51 | 0.39 | 1.67 | 0.51 | 5.01 | 1.16 | 0.13 |

Looking at all citances appeared in year1 (1 year after the abstract), the following unique NEW IDs where found (first row -> number, second row -> %):

Total number of unique annotations = 2046

| A     | B    | C    | D     | Dchem | Dent | E    | F    | Ffunc | Fdis | G     | H    | I    | J    | K    | L    | M    | N    | V    | Z    |
|-------|------|------|-------|-------|------|------|------|-------|------|-------|------|------|------|------|------|------|------|------|------|
| 210   | 146  | 87   | 345   | 236   | 109  | 147  | 166  | 139   | 7    | 497   | 101  | 68   | 18   | 7    | 56   | 21   | 123  | 52   | 2    |
| 10.26 | 7.14 | 4.25 | 16.86 | 11.53 | 5.33 | 8.11 | 8.11 | 6.79  | 0.34 | 24.29 | 4.94 | 3.32 | 0.88 | 0.34 | 2.74 | 1.03 | 6.01 | 2.54 | 0.10 |

Looking at all citances appeared in year2 (2 years after the abstract), the following unique NEW IDs where found (first row -> number, second row -> %):

Total number of unique annotations = 1563

| A    | B    | C    | D     | Dchem | Dent | E    | F    | Ffunc | Fdis | G     | H    | I    | J    | K    | L    | M    | N    | V    | Z    |
|------|------|------|-------|-------|------|------|------|-------|------|-------|------|------|------|------|------|------|------|------|------|
| 127  | 105  | 75   | 300   | 241   | 59   | 135  | 143  | 124   | 7    | 273   | 82   | 64   | 29   | 9    | 49   | 22   | 118  | 30   | 2    |
| 8.13 | 6.72 | 4.80 | 19.19 | 15.42 | 3.77 | 9.15 | 9.15 | 7.93  | 0.45 | 17.47 | 5.25 | 4.09 | 1.86 | 0.58 | 3.13 | 1.41 | 7.55 | 1.92 | 0.13 |

Looking at all citances appeared in year3 (3 years after the abstract), the following unique NEW IDs where found (first row -> number, second row -> %):

Total number of unique annotations = 1089

| A    | B    | C    | D     | Dchem | Dent | E    | F    | Ffunc | Fdis | G     | H    | I    | J    | K    | L    | M    | N    | V    | Z    |
|------|------|------|-------|-------|------|------|------|-------|------|-------|------|------|------|------|------|------|------|------|------|
| 69   | 69   | 61   | 230   | 199   | 31   | 107  | 90   | 74    | 6    | 191   | 61   | 25   | 24   | 5    | 36   | 23   | 62   | 29   | 7    |
| 6.34 | 6.34 | 5.60 | 21.12 | 18.27 | 2.85 | 8.26 | 8.26 | 6.80  | 0.55 | 17.54 | 5.60 | 2.30 | 2.20 | 0.46 | 3.31 | 2.11 | 5.69 | 2.66 | 0.64 |

Looking at all citances appeared in year4+ (4+ years after the abstract), the following unique NEW IDs where found (first row -> number, second row -> %):

Total number of unique annotations = 2168

| A    | B    | C    | D     | Dchem | Dent | E    | F    | Ffunc | Fdis | G     | H    | I    | J    | K    | L    | M    | N    | V    | Z    |
|------|------|------|-------|-------|------|------|------|-------|------|-------|------|------|------|------|------|------|------|------|------|
| 181  | 141  | 128  | 430   | 381   | 49   | 166  | 163  | 140   | 6    | 380   | 121  | 63   | 47   | 8    | 73   | 36   | 166  | 49   | 16   |
| 8.35 | 6.50 | 5.90 | 19.83 | 17.57 | 2.26 | 7.52 | 7.52 | 6.46  | 0.28 | 17.53 | 5.58 | 2.91 | 2.17 | 0.37 | 3.37 | 1.66 | 7.66 | 2.26 | 0.74 |

Looking at all unique IDs that the abstracts and citances appeared in year0 (same year as abstract) have in common (first row -> number, second row -> %):

Total number of unique annotations = 373

| A    | B    | C    | D     | Dchem | Dent  | E    | F    | Ffunc | Fdis | G     | H    | I    | J    | K    | L    | M    | N    | V    | Z    |
|------|------|------|-------|-------|-------|------|------|-------|------|-------|------|------|------|------|------|------|------|------|------|
| 35   | 37   | 7    | 77    | 25    | 52    | 7    | 24   | 19    | 0    | 140   | 17   | 10   | 1    | 0    | 0    | 1    | 12   | 5    | 0    |
| 9.38 | 9.92 | 1.88 | 20.64 | 6.70  | 13.94 | 6.43 | 6.43 | 5.09  | 0.00 | 37.53 | 4.56 | 2.68 | 0.27 | 0.00 | 0.00 | 0.27 | 3.22 | 1.34 | 0.00 |

Looking at all NEW unique IDs that the abstracts and citances appeared in year1 (1 year after the abstract) have in common (first row -> number, second row -> %):

Total number of unique annotations = 683

| A     | B     | C    | D     | Dchem | Dent | E    | F    | Ffunc | Fdis | G     | H    | I    | J    | K    | L    | M    | N    | V    | Z    |
|-------|-------|------|-------|-------|------|------|------|-------|------|-------|------|------|------|------|------|------|------|------|------|
| 69    | 80    | 28   | 115   | 47    | 68   | 15   | 44   | 39    | 1    | 238   | 17   | 28   | 1    | 0    | 4    | 1    | 31   | 12   | 0    |
| 10.10 | 11.71 | 4.10 | 16.84 | 6.88  | 9.96 | 6.44 | 6.44 | 5.71  | 0.15 | 34.85 | 2.49 | 4.10 | 0.15 | 0.00 | 0.59 | 0.15 | 4.54 | 1.76 | 0.00 |

Looking at all NEW unique IDs that the abstracts and citances appeared in year2 (2 years after the abstract) have in common (first row -> number, second row -> %):

Total number of unique annotations = 268

| A    | B     | C    | D     | Dchem | Dent  | E    | F    | Ffunc | Fdis | G     | H    | I    | J    | K    | L    | M    | N    | V    | Z    |
|------|-------|------|-------|-------|-------|------|------|-------|------|-------|------|------|------|------|------|------|------|------|------|
| 17   | 27    | 11   | 55    | 24    | 31    | 11   | 25   | 20    | 0    | 80    | 11   | 10   | 2    | 0    | 1    | 0    | 15   | 3    | 0    |
| 6.34 | 10.07 | 4.10 | 20.52 | 8.96  | 11.57 | 9.33 | 9.33 | 7.46  | 0.00 | 29.85 | 4.10 | 3.73 | 0.75 | 0.00 | 0.37 | 0.00 | 5.60 | 1.12 | 0.00 |

Looking at all NEW unique IDs that the abstracts and citances appeared in year3 (3 years after the abstract) have in common (first row -> number, second row -> %):

Total number of unique annotations = 104

| A    | B    | C    | D     | Dchem | Dent  | E    | F    | Ffunc | Fdis | G     | H    | I    | J    | K    | L    | M    | N    | V    | Z    |
|------|------|------|-------|-------|-------|------|------|-------|------|-------|------|------|------|------|------|------|------|------|------|
| 7    | 10   | 0    | 27    | 13    | 14    | 1    | 7    | 5     | 0    | 33    | 3    | 4    | 2    | 0    | 2    | 0    | 6    | 2    | 0    |
| 6.73 | 9.62 | 0.00 | 25.96 | 12.50 | 13.46 | 6.73 | 6.73 | 4.81  | 0.00 | 31.73 | 2.88 | 3.85 | 1.92 | 0.00 | 1.92 | 0.00 | 5.77 | 1.92 | 0.00 |

Looking at all NEW unique IDs that the abstracts and citances appeared in year4+ (4+ years after the abstract) have in common (first row -> number, second row -> %):

Total number of unique annotations = 170

| A    | B     | C    | D     | Dchem | Dent | E    | F    | Ffunc | Fdis | G     | H    | I    | J    | K    | L    | M    | N    | V    | Z    |
|------|-------|------|-------|-------|------|------|------|-------|------|-------|------|------|------|------|------|------|------|------|------|
| 11   | 22    | 1    | 27    | 17    | 10   | 6    | 12   | 11    | 0    | 64    | 7    | 4    | 1    | 0    | 3    | 0    | 10   | 2    | 0    |
| 6.47 | 12.94 | 0.59 | 15.88 | 10.00 | 5.88 | 7.06 | 7.06 | 6.47  | 0.00 | 37.65 | 4.12 | 2.35 | 0.59 | 0.00 | 1.76 | 0.00 | 5.88 | 1.18 | 0.00 |

6. Overall year/time effect for 0adjoining citances

PER TREE ID

| YEAR    | ANNOTATIONS | UNIQUE_ANNOTATIONS_NOT_APPEARED_BEFORE | UNIQUE_ANNOTATIONS_IN_COMMON_WITH_ABSTRACTS |
|---------|-------------|----------------------------------------|---------------------------------------------|
| 0       | 793         | 793                                    | 381                                         |
| 1       | 2666        | 2083                                   | 692                                         |
| 2       | 3366        | 1583                                   | 275                                         |
| 3       | 3234        | 1096                                   | 107                                         |
| 4+      | 5312        | 2178                                   | 172                                         |
| total = |             |                                        | 1627 of 1962 found in abstracts             |

PER TRUNCATED TREE ID

| YEAR    | ANNOTATIONS | UNIQUE_ANNOTATIONS_NOT_APPEARED_BEFORE | UNIQUE_ANNOTATIONS_IN_COMMON_WITH_ABSTRACTS |
|---------|-------------|----------------------------------------|---------------------------------------------|
| 0       | 1145        | 1145                                   | 427                                         |
| 1       | 4610        | 3360                                   | 822                                         |
| 2       | 6096        | 2885                                   | 361                                         |
| 3       | 5737        | 1952                                   | 138                                         |
| 4+      | 19823       | 6641                                   | 227                                         |
| total = |             |                                        | 1975 of 2867 found in abstracts             |

CITANCES WITH 0 ADJOINING CITATIONS VS ABSTRACTS

| FILE                                | ANNOTATIONS |
|-------------------------------------|-------------|
| abstracts treeIDs                   | 2867        |
| adj0 treeIDs                        | 6075        |
| abstracts_adj0 common treeIDs       | 1516        |
| abstracts trunc_treeIDs             | 1962        |
| adj0 trunc_treeIDs                  | 3584        |
| abstracts_adj0 common trunc_treeIDs | 1259        |
