# Supplementary material for: Do Peers See More in a Paper Than Its Authors?
Source: Adv Bioinformatics. 2012 Nov 27;2012:750214. doi: 10.1155/2012/750214 (PMC3514807; doi:10.1155/2012/750214)
Supplement: Supplementary file 2 [file 750214.f2.log]

format:
year_volume_issn_issue_start-page

So,  for:  2003_334_0022-2836_3_585
year:2003
volume:334
issn:0022-2836
issue:3
page:585
 ---------------------------------
 
	Citances for pmid: 1579162
 1995_5_0960-9822_11_1257
 1995_69_0022-538X_11_6787
 1995_83_0092-8674_3_397
 1995_83_0092-8674_4_563
 1996_12_0168-9525_10_405
 1996_24_0305-1048_15_2885
 1996_24_0305-1048_15_2885
 1996_24_0305-1048_5_816
 1996_24_0305-1048_5_816
 1996_271_0021-9258_34_20868
 1996_271_0021-9258_39_24115
 1996_271_0021-9258_51_32503
 1996_271_0021-9258_52_33678
 1996_274_0036-8075_5293_1659
 1996_6_0959-437X_2_203
 1996_6_0959-437X_2_203
 1996_6_0960-9822_11_1416
 1996_6_0960-9822_3_229
 1996_6_0960-9822_4_467
 1996_70_0022-538X_10_6790
 1996_85_0092-8674_6_785
 1996_86_0092-8674_4_667
 1996_87_0092-8674_2_287
 1996_8_0955-0674_3_354
 1996_8_0955-0674_3_354
 1996_93_0027-8424_19_9997
 1996_93_0027-8424_1_502
 1996_93_0027-8424_21_11569
 1996_93_0027-8424_4_1498
 1996_93_0027-8424_4_1566
 1996_93_0027-8424_4_1566
 1997_11_0890-9369_24_3365
 1997_11_0890-9369_24_3375
 1997_12_1046-2023_3_224
 1997_13_0169-4758_12_468
 1997_13_1046-2023_3_221
 1997_13_1081-0706__293
 1997_16_0261-4189_14_4340
 1997_16_0261-4189_14_4340
 1997_16_0261-4189_19_5966
 1997_16_0261-4189_19_5966
 1997_237_0006-291X_3_707
 1997_237_0042-6822_2_198
 1997_25_0305-1048_21_4250
 1997_25_0305-1048_21_4250
 1997_25_0305-1048_24_5057
 1997_25_0305-1048_24_5057
 1997_25_0305-1048_3_530
 1997_25_0305-1048_3_530
 1997_25_0305-1048_9_1753
 1997_25_0305-1048_9_1753
 1997_272_0021-9258_16_10928
 1997_272_0021-9258_39_24508
 1997_272_0021-9258_45_28247
 1997_275_0036-8075_5302_993
 1997_276_0036-8075_5313_806
 1997_283_0076-6879__549
 1997_45_0888-7543_2_327
 1997_46_0888-7543_2_294
 1997_51_0066-4227__125
 1997_79_0300-9084_9-10_541
 1997_7_0959-437X_2_152
 1997_7_0959-437X_2_152
 1997_88_0092-8674_4_493
 1997_90_0092-8674_1_87
 1997_91_0092-8674_1_59
 1997_91_0092-8674_3_311
 1997_94_0027-8424_11_5611
 1997_94_0027-8424_11_5611
 1997_94_0027-8424_16_8427
 1997_94_0027-8424_16_8427
 1997_94_0027-8424_1_142
 1997_94_0027-8424_1_142
 1997_94_0027-8424_20_10786
 1997_94_0027-8424_20_10786
 1997_94_0027-8424_23_12491
 1997_94_0027-8424_23_12491
 1997_94_0027-8424_26_14320
 1997_94_0027-8424_26_14320
 1997_94_0027-8424_6_2186
 1997_94_0027-8424_6_2186
 1997_94_0027-8424_8_3888
 1997_94_0027-8424_8_3888
 1997_9_0955-0674_3_358
 1997_9_0955-0674_3_358
 1998_10_0955-0674_6_742
 1998_10_0955-0674_6_742
 1998_1398_0167-4781_2_113
 1998_140_0021-9525_2_271
 1998_142_0021-9525_2_307
 1998_17_0261-4189_10_2961
 1998_17_0261-4189_15_4511
 1998_17_0261-4189_15_4511
 1998_17_0261-4189_17_5192
 1998_17_0261-4189_17_5192
 1998_17_0261-4189_19_5689
 1998_17_0261-4189_19_5689
 1998_17_0261-4189_24_7219
 1998_17_0261-4189_24_7219
 1998_18_0270-7306_10_6102
 1998_18_0270-7306_11_6679
 1998_18_0270-7306_12_7294
 1998_18_0270-7306_3_1296
 1998_18_0270-7306_3_1670
 1998_18_0270-7306_5_2758
 1998_18_0270-7306_9_5392
 1998_19_1061-4036_4_375
 1998_22_0145-2126_1_1
 1998_23_0968-0004_2_79
 1998_241_0014-4827_1_260
 1998_243_0014-4827_1_50
 1998_246_0006-291X_3_634
 1998_26_0305-1048_10_2392
 1998_26_0305-1048_10_2392
 1998_273_0021-9258_34_22083
 1998_273_0021-9258_38_24543
 1998_273_0021-9258_3_1298
 1998_273_0021-9258_42_27137
 1998_273_0021-9258_49_32421
 1998_279_0036-8075_5347_95
 1998_279_0036-8075_5357_1733
 1998_280_0036-8075_5363_593
 1998_2_1097-2765_1_23
 1998_3_1356-9597_11_737
 1998_92_0092-8674_3_295
 1998_95_0027-8424_25_14757
 1998_95_0027-8424_25_14757
 1998_95_0027-8424_5_2384
 1998_95_0027-8424_5_2384
 1998_95_0027-8424_7_3603
 1998_95_0027-8424_7_3603
 1999_10_1059-1524_10_3263
 1999_10_1059-1524_12_4091
 1999_112_0021-9533_12_2011
 1999_13_0890-9369_10_1289
 1999_13_0890-9369_20_2619
 1999_13_0890-9369_20_2639
 1999_13_0890-9369_6_637
 1999_151_0016-6731_1_31
 1999_151_0016-6731_4_1445
 1999_152_0016-6731_3_943
 1999_18_0261-4189_13_3808
 1999_18_0261-4189_13_3808
 1999_18_0261-4189_20_5683
 1999_18_0261-4189_20_5683
 1999_18_0261-4189_9_2435
 1999_18_0261-4189_9_2435
 1999_18_1046-2023_3_356
 1999_18_1046-2023_3_407
 1999_18_1046-2023_3_418
 1999_19_0270-7306_10_6699
 1999_19_0270-7306_10_7228
 1999_19_0270-7306_11_7428
 1999_19_0270-7306_2_1038
 1999_19_0270-7306_2_1226
 1999_19_0270-7306_5_3506
 1999_19_0270-7306_6_4231
 1999_19_0270-7306_7_4888
 1999_1_1465-7392_7_415
 1999_23_0896-6273_1_45
 1999_248_0014-4827_1_58
 1999_263_0042-6822_1_42
 1999_264_0014-2956_2_415
 1999_265_0014-2956_3_936
 1999_274_0021-9258_33_23027
 1999_274_0021-9258_36_25927
 1999_274_0021-9258_42_30310
 1999_274_0021-9258_7_4155
 1999_27_0305-1048_10_2091
 1999_27_0305-1048_10_2091
 1999_27_0305-1048_9_2022
 1999_27_0305-1048_9_2022
 1999_288_0022-2836_5_867
 1999_3_1097-2765_4_477
 1999_447_0014-5793_2-3_292
 1999_4_1097-2765_4_529
 1999_62_0888-7543_1_11
 1999_68_0066-4154__649
 1999_96_0027-8424_22_12367
 1999_96_0027-8424_22_12367
 1999_96_0027-8424_2_441
 1999_96_0027-8424_2_441
 1999_96_0027-8424_6_2656
 1999_96_0027-8424_6_2656
 1999_96_0092-8674_3_415
 1999_97_0092-8674_2_245
 1999__0730-2312__1
 2000_100_0092-8674_1_71
 2000_10_0960-9822_24_1547
 2000_11_1059-1524_5_1673
 2000_129_1047-8477_2-3_198
 2000_14_0890-9369_12_1528
 2000_14_0890-9369_13_1631
 2000_14_0890-9369_14_1765
 2000_14_0890-9369_18_2330
 2000_14_0890-9369_8_913
 2000_154_0016-6731_2_599
 2000_155_0016-6731_2_509
 2000_158_0168-9452_1-2_33
 2000_19_0261-4189_17_4774
 2000_19_0261-4189_17_4774
 2000_19_0261-4189_9_2082
 2000_19_0261-4189_9_2082
 2000_20_0270-7306_10_3667
 2000_20_0270-7306_11_3795
 2000_20_0270-7306_22_8602
 2000_20_0270-7306_8_2809
 2000_20_0270-7306_9_3086
 2000_245_0378-1119_1_13
 2000_275_0021-9258_13_9734
 2000_275_0021-9258_24_18011
 2000_275_0021-9258_45_34983
 2000_275_0021-9258_45_35051
 2000_275_0021-9258_45_35233
 2000_275_0021-9258_8_5904
 2000_28_0305-1048_10_2060
 2000_28_0305-1048_10_2060
 2000_28_0305-1048_10_2099
 2000_28_0305-1048_10_2099
 2000_28_0305-1048_23_4769
 2000_28_0305-1048_23_4769
 2000_28_0305-1048_2_472
 2000_28_0305-1048_2_472
 2000_28_0305-1048_3_843
 2000_28_0305-1048_3_843
 2000_290_0036-8075_5500_2271
 2000_295_0022-2836_3_423
 2000_299_0022-2836_3_667
 2000_300_0022-2836_1_75
 2000_4_1367-5931_5_581
 2000_5_1356-9597_12_975
 2000_5_1356-9597_6_481
 2000_64_1092-2172_2_435
 2000_69_0066-4154__829
 2000_6_1097-2765_3_637
 2000_74_0022-538X_18_8601
 2000_74_0022-538X_18_8601
 2000_97_0027-8424_26_14115
 2000_97_0027-8424_26_14115
 2000_97_0027-8424_26_14127
 2000_97_0027-8424_26_14127
 2000_97_0027-8424_6_2399
 2000_97_0027-8424_6_2399
 2001_106_0092-8674_3_287
 2001_114_0021-9533_8_1447
 2001_11_0960-9822_18_1427
 2001_11_1088-9051_10_1641
 2001_12_1059-1524_11_3658
 2001_12_1059-1524_5_1257
 2001_12_1059-1524_6_1671
 2001_13_1040-4651_12_2671
 2001_152_0021-9525_6_1267
 2001_159_0016-6731_1_35
 2001_15_0890-9369_2_134
 2001_15_0890-9369_2_147
 2001_18_0749-503X_4_291
 2001_20_0261-4189_16_4588
 2001_20_0261-4189_16_4588
 2001_20_0261-4189_17_4648
 2001_20_0261-4189_17_4648
 2001_20_0261-4189_8_2097
 2001_20_0261-4189_8_2097
 2001_21_0270-7306_15_4938
 2001_21_0270-7306_17_5767
 2001_21_0270-7306_4_1098
 2001_21_0270-7306_8_2790
 2001_276_0021-9258_18_15397
 2001_276_0021-9258_28_26666
 2001_276_0021-9258_29_26947
 2001_276_0021-9258_31_29067
 2001_276_0021-9258_48_44905
 2001_276_0021-9258_48_45417
 2001_276_0021-9258_51_48000
 2001_276_0021-9258_51_48526
 2001_276_0021-9258_9_6337
 2001_294_0036-8075_5550_2357
 2001_29_0305-1048_22_4570
 2001_29_0305-1048_22_4570
 2001_29_0305-1048_23_4881
 2001_29_0305-1048_23_4881
 2001_2_1471-0056_8_640
 2001_33_1357-2725_2_175
 2001_3_1465-7392_8_715
 2001_411_0028-0836_6841_1068
 2001_52_0022-0957_355_193
 2001_69_0301-4681_1_18
 2001_6_1356-9597_10_837
 2001_7_1097-2765_1_21
 2001_7_1097-2765_4_705
 2001_83_0300-9084_11-12_1029
 2001_8_1097-2765_5_1093
 2001_98_0027-8424_15_8361
 2001_98_0027-8424_15_8361
 2001_98_0027-8424_18_10085
 2001_98_0027-8424_18_10085
 2001_98_0027-8424_20_11152
 2001_98_0027-8424_20_11152
 2001_98_0027-8424_21_11997
 2001_98_0027-8424_21_11997
 2001_98_0027-8424_24_13589
 2001_98_0027-8424_24_13589
 2001_98_0027-8424_9_4938
 2001_98_0027-8424_9_4938
 2002_109_0092-8674_7_849
 2002_111_0009-5915_5_291
 2002_13_1059-1524_2_607
 2002_140_1047-8477_1-3_17
 2002_1578_0167-4781_1-3_59
 2002_159_0021-9525_2_225
 2002_160_0016-6731_4_1319
 2002_162_0016-6731_3_1117
 2002_16_0890-9369_6_659
 2002_190_0021-9541_3_287
 2002_19_0749-503X_4_319
 2002_1_1535-9778_4_548
 2002_21_0261-4189_12_3148
 2002_21_0261-4189_12_3148
 2002_21_0261-4189_17_4600
 2002_21_0261-4189_17_4600
 2002_21_0261-4189_18_4763
 2002_21_0261-4189_18_4763
 2002_21_0950-9232_4_512
 2002_21_0950-9232_8_1150
 2002_22_0270-7306_24_8426
 2002_22_0270-7306_4_1036
 2002_277_0021-9258_12_10354
 2002_277_0021-9258_18_16033
 2002_277_0021-9258_19_16920
 2002_277_0021-9258_28_25431
 2002_277_0021-9258_35_31430
 2002_277_0021-9258_43_40520
 2002_277_0021-9258_4_2702
 2002_297_0006-291X_2_396
 2002_297_0036-8075_5583_1026
 2002_30_0305-1048_11_2261
 2002_30_0305-1048_11_2261
 2002_30_0305-1048_23_5205
 2002_30_0305-1048_23_5205
 2002_3_1471-0072_11_826
 2002_415_0028-0836_6872_651
 2002_71_0066-4154__333
 2002_76_0022-538X_7_3158
 2002_76_0022-538X_7_3158
 2002_7_1356-9597_6_523
 2002_7_1356-9597_6_523
 2002_99_0027-8424_1_101
 2002_99_0027-8424_1_101
 2003_17_0890-9369_15_1817
 2003_17_0890-9369_15_1894
 2003_185_0021-9193_20_5959
 2003_185_0021-9193_20_5959
 2003_22_0261-4189_16_4294
 2003_22_0261-4189_16_4294
 2003_22_0261-4189_22_6115
 2003_22_0261-4189_22_6115
 2003_22_0261-4189_3_704
 2003_22_0261-4189_3_704
 2003_22_0261-4189_4_954
 2003_22_0261-4189_4_954
 2003_22_0261-4189_4_964
 2003_22_0261-4189_4_964
 2003_23_0270-7306_10_3536
 2003_23_0270-7306_14_5005
 2003_23_0270-7306_19_6769
 2003_23_0270-7306_3_804
 2003_26_0168-6445_5_533
 2003_270_0014-2956_19_3880
 2003_278_0021-9258_11_9754
 2003_278_0021-9258_38_36051
 2003_278_0021-9258_42_41528
 2003_278_0021-9258_42_41535
 2003_278_0021-9258_47_46424
 2003_278_0021-9258_47_46440
 2003_278_0021-9258_49_48524
 2003_278_0021-9258_8_6093
 2003_302_0006-291X_4_728
 2003_303_0006-291X_1_251
 2003_31_0305-1048_2_619
 2003_31_0305-1048_2_619
 2003_31_0305-1048_8_2035
 2003_31_0305-1048_8_2035
 2003_462_0014-2999_1-3_15
 2003_52_1383-5769_1_41
 2003_63_0008-5472_21_7356
 2003_8_1356-9597_5_465
 2004_101_0027-8424_52_17952
 2004_101_0027-8424_52_17952
 2004_116_0092-8674_1_25
 2004_117_0021-9533_22_5221
 2004_131_0950-1991_19_4807
 2004_15_1059-1524_8_3740
 2004_1677_0167-4781_1-3_142
 2004_18_0890-9369_7_769
 2004_22_0734-9750_8_621
 2004_23_0261-4189_13_2651
 2004_23_0261-4189_1_191
 2004_23_0261-4189_4_897
 2004_24_0270-7306_14_6514
 2004_24_0270-7306_16_7140
 2004_24_0270-7306_4_1614
 2004_279_0021-9258_34_35879
 2004_279_0021-9258_9_8469
 2004_340_0022-2836_1_29
 2004_36_1061-4036_6_559
 2004_38_0066-4197__273
 2004_430_0028-0836_7002_913
 2004_574_0014-5793_1-3_192
 2004_5_1471-0072_10_848
 2005_102_0027-8424_1_69
 2005_102_0027-8424_24_8519
 2005_102_0027-8424_2_337
 2005_16_1059-1524_6_2624
 2005_16_1084-9521_3_343
 2005_19_0890-9369_9_1053
 2005_21_0168-9525_3_149
 2005_24_0950-9232_17_2827
 2005_25_0270-7306_4_1560
 2005_280_0021-9258_13_12643
 2005_280_0021-9258_13_13071
 2005_280_0021-9258_8_6285
 2005_353_0378-1119_1_23
 2005_40_1040-9238_2_115
 2005_44_0006-2960_21_7885
 2005_44_0006-2960_8_2916
 2005_569_0027-5107_1-2_111
 2005_579_0014-5793_4_877
 2005_95_0730-2312_2_391
 
	Citances for PMID: 10766247
 2000_11_1059-1524_12_4117
 2000_12_0955-0674_6_690
 2000_12_0955-0674_6_690
 2000_14_0890-9369_14_1765
 2000_20_0270-7306_22_8602
 2000_275_0021-9258_45_34983
 2000_275_0021-9258_50_39773
 2000_28_0305-1048_23_4769
 2000_28_0305-1048_23_4769
 2000_290_0036-8075_5500_2271
 2000_290_0036-8075_5500_2309
 2000_3_1369-5274_6_631
 2000_97_0027-8424_26_14115
 2000_97_0027-8424_26_14115
 2001_101_0009-2665_8_2511
 2001_114_0021-9533_8_1447
 2001_11_0959-437X_1_64
 2001_11_0959-437X_1_64
 2001_11_0960-9822_20_1595
 2001_11_0960-9822_9_R367
 2001_15_0890-9369_20_2741
 2001_20_0261-4189_13_3293
 2001_20_0261-4189_13_3293
 2001_20_0261-4189_15_4263
 2001_20_0261-4189_15_4263
 2001_20_0261-4189_17_4648
 2001_20_0261-4189_17_4648
 2001_276_0021-9258_37_34428
 2001_276_0021-9258_41_38076
 2001_276_0021-9258_46_42744
 2001_276_0021-9258_48_44905
 2001_276_0021-9258_51_48526
 2001_276_0021-9258_9_6337
 2001_308_0022-2836_4_597
 2001_3_1465-7392_2_107
 2001_3_1465-7392_2_E49
 2001_3_1465-7392_8_715
 2001_52_0022-0957_355_193
 2001_8_1097-2765_5_1093
 2001_98_0027-8424_18_10085
 2001_98_0027-8424_18_10085
 2001_98_0027-8424_20_11152
 2001_98_0027-8424_20_11152
 2001_98_0027-8424_23_13114
 2001_98_0027-8424_23_13114
 2002_109_0092-8674_7_849
 2002_111_0092-8674_3_419
 2002_115_0021-9533_14_2829
 2002_115_0021-9533_15_3159
 2002_115_0021-9533_1_51
 2002_115_0021-9533_7_1435
 2002_12_0960-9822_8_678
 2002_12_0960-9822_8_689
 2002_12_0962-8924_2_72
 2002_13_1059-1524_10_3662
 2002_13_1059-1524_11_3989
 2002_13_1059-1524_2_435
 2002_13_1059-1524_2_607
 2002_13_1059-1524_4_1298
 2002_140_1047-8477_1-3_17
 2002_1599_1570-9639_1-2_149
 2002_159_0021-9525_2_225
 2002_16_0890-9369_10_1182
 2002_16_0890-9369_6_659
 2002_21_0261-4189_12_3148
 2002_21_0261-4189_12_3148
 2002_21_0950-9232_43_6624
 2002_21_0950-9232_8_1150
 2002_22_0270-7306_4_1036
 2002_22_0270-7306_6_1868
 2002_269_0014-2956_3_1040
 2002_277_0021-9258_12_10354
 2002_277_0021-9258_18_16033
 2002_277_0021-9258_34_30824
 2002_277_0021-9258_36_33049
 2002_277_0021-9258_43_40520
 2002_277_0021-9258_43_40871
 2002_32_0020-7519_14_1683
 2002_38_0894-1491_4_313
 2002_3_1471-0072_11_826
 2002_419_0028-0836_6908_718
 2002_4_1465-7392_3_198
 2002_4_1465-7392_3_E58
 2002_71_0066-4154__333
 2002_7_1356-9597_6_523
 2002_7_1356-9597_6_523
 2002_99_0027-8424_1_101
 2002_99_0027-8424_1_101
 2002_9_1097-2765_2_233
 2002_9_1097-2765_3_481
 2003_113_0092-8674_1_115
 2003_116_0021-9533_19_3971
 2003_14_1059-1524_6_2206
 2003_14_1059-1524_9_3876
 2003_22_0261-4189_16_4294
 2003_22_0261-4189_16_4294
 2003_22_0261-4189_3_704
 2003_22_0261-4189_3_704
 2003_23_0270-7306_19_6769
 2003_270_0014-2956_19_3880
 2003_278_0021-9258_11_9754
 2003_278_0021-9258_33_30854
 2003_278_0021-9258_49_48524
 2003_31_0305-1048_16_4888
 2003_31_0305-1048_16_4888
 2003_31_0305-1048_2_570
 2003_31_0305-1048_2_570
 2003_327_0022-2836_1_111
 2003_423_0028-0836_6942_885
 2003_4_1469-221X_1_26
 2003_4_1469-221X_1_26
 2003_4_1469-221X_1_42
 2003_4_1469-221X_1_42
 2003_63_0008-5472_21_7356
 2003_77_0022-538X_4_2369
 2003_77_0022-538X_4_2369
 2003_8_1356-9597_5_465
 2004_113_0009-5915_3_113
 2004_117_0021-9533_21_4909
 2004_131_0950-1991_19_4807
 2004_165_0002-9440_4_1351
 2004_165_0021-9525_2_181
 2004_16_1040-4651_9_2380
 2004_22_0734-9750_8_621
 2004_23_0261-4189_15_3122
 2004_23_0950-9232_1_58
 2004_24_0270-7306_16_7140
 2004_279_0021-9258_10_9625
 2004_279_0021-9258_16_16144
 2004_279_0021-9258_17_17283
 2004_279_0021-9258_19_19691
 2004_279_0021-9258_26_27315
 2004_279_0021-9258_27_28071
 2004_279_0021-9258_29_30807
 2004_279_0021-9258_31_32569
 2004_279_0021-9258_44_45957
 2004_295_0014-4827_1_138
 2004_342_0022-2836_1_275
 2004_427_0028-0836_6976_745
 2004_430_0028-0836_7002_913
 2004_68_1092-2172_1_109
 2004_6_1465-7392_10_991
 2004_6_1465-7392_3_260
 2005_120_0092-8674_3_315
 2005_15_0960-9822_2_146
 2005_16_1084-9521_3_449
 2005_19_0890-9369_1_114
 2005_21_0168-9525_3_149
 2005_24_0261-4189_2_395
 2005_24_0950-9232_17_2827
 2005_280_0021-9258_20_19689
 2005_33_0305-1048_1_316
 2005_33_0305-1048_2_765
 2005_569_0027-5107_1-2_111
 2005_579_0014-5793_4_877
 2005_6_1471-0072_6_476
 
	Citances for PMID: 7502077
 1996_271_0021-9258_34_20868
 1996_271_0021-9258_51_32503
 1996_274_0036-8075_5293_1659
 1996_6_0960-9822_11_1416
 1996_6_0960-9822_12_1592
 1996_6_0960-9822_3_229
 1996_6_0960-9822_4_467
 1996_70_0022-538X_11_7398
 1996_85_0092-8674_6_785
 1996_87_0092-8674_1_85
 1996_87_0092-8674_2_287
 1996_8_0955-0674_6_815
 1996_8_0955-0674_6_815
 1997_11_0890-9369_21_2767
 1997_137_0021-9525_1_183
 1997_13_1046-2023_3_221
 1997_13_1081-0706__293
 1997_16_0261-4189_14_4340
 1997_16_0261-4189_14_4340
 1997_237_0042-6822_2_198
 1997_25_0305-1048_3_530
 1997_25_0305-1048_3_530
 1997_25_0305-1048_8_1626
 1997_25_0305-1048_8_1626
 1997_272_0021-9258_16_10928
 1997_272_0021-9258_45_28247
 1997_46_0888-7543_2_294
 1997_51_0066-4227__125
 1997_7_0959-437X_2_152
 1997_7_0959-437X_2_152
 1997_7_0962-8924_1_9
 1997_88_0092-8674_4_493
 1997_91_0092-8674_3_311
 1997_94_0027-8424_12_6142
 1997_94_0027-8424_12_6142
 1997_94_0027-8424_1_142
 1997_94_0027-8424_1_142
 1997_94_0027-8424_23_12491
 1997_94_0027-8424_23_12491
 1997_94_0027-8424_26_14320
 1997_94_0027-8424_26_14320
 1997_94_0027-8424_8_3888
 1997_94_0027-8424_8_3888
 1997_9_0955-0674_3_358
 1997_9_0955-0674_3_358
 1998_10_0955-0674_6_742
 1998_10_0955-0674_6_742
 1998_140_0021-9525_2_271
 1998_17_0261-4189_10_2961
 1998_17_0261-4189_24_7219
 1998_17_0261-4189_24_7219
 1998_18_0270-7306_11_6679
 1998_18_0270-7306_5_2758
 1998_241_0014-4827_1_260
 1998_26_0305-1048_10_2392
 1998_26_0305-1048_10_2392
 1998_26_0305-1048_19_4413
 1998_26_0305-1048_19_4413
 1998_26_0305-1048_19_4413
 1998_26_0305-1048_20_4635
 1998_26_0305-1048_20_4635
 1998_273_0021-9258_29_18205
 1998_273_0021-9258_36_23248
 1998_273_0021-9258_38_24543
 1998_273_0021-9258_38_24891
 1998_273_0021-9258_42_27137
 1998_273_0021-9258_49_32421
 1998_72_0022-538X_11_8559
 1998_72_0022-538X_11_8559
 1998_95_0027-8424_7_3603
 1998_95_0027-8424_7_3603
 1998_9_1059-1524_1_63
 1999_13_0890-9369_10_1289
 1999_13_0890-9369_20_2639
 1999_151_0016-6731_4_1445
 1999_18_0261-4189_13_3808
 1999_18_0261-4189_13_3808
 1999_18_0261-4189_9_2435
 1999_18_0261-4189_9_2435
 1999_19_0270-7306_10_6699
 1999_19_0270-7306_10_7228
 1999_19_0270-7306_5_3506
 1999_248_0014-4827_1_58
 1999_265_0014-2956_3_936
 1999_274_0021-9258_33_23027
 1999_274_0021-9258_36_25927
 1999_27_0305-1048_7_1600
 1999_27_0305-1048_7_1600
 1999_446_0014-5793_1_189
 1999__0730-2312__1
 2000_129_1047-8477_2-3_198
 2000_154_0016-6731_2_599
 2000_158_0168-9452_1-2_33
 2000_20_0270-7306_10_3667
 2000_20_0270-7306_22_8602
 2000_20_0270-7306_3_1021
 2000_275_0021-9258_15_11154
 2000_275_0021-9258_45_34983
 2000_275_0021-9258_45_35233
 2000_275_0021-9258_6_4239
 2000_275_0021-9258_8_5904
 2000_287_0036-8075_5460_2023
 2000_5_1356-9597_6_481
 2000_69_0066-4154__829
 2001_106_0092-8674_3_287
 2001_12_1059-1524_11_3386
 2001_13_1040-4651_12_2671
 2001_20_0261-4189_15_4263
 2001_20_0261-4189_15_4263
 2001_20_0261-4189_16_4588
 2001_20_0261-4189_16_4588
 2001_20_0261-4189_17_4648
 2001_20_0261-4189_17_4648
 2001_21_0270-7306_2_624
 2001_268_0378-1119_1-2_1
 2001_271_0014-4827_2_230
 2001_276_0021-9258_28_26666
 2001_276_0021-9258_29_26947
 2001_276_0021-9258_31_29067
 2001_276_0021-9258_9_6337
 2001_2_1471-0056_8_640
 2001_52_0022-0957_355_193
 2001_6_1356-9597_10_837
 2002_109_0092-8674_7_849
 2002_129_0032-0889_1_40
 2002_129_0032-0889_1_40
 2002_22_0270-7306_4_1036
 2002_277_0021-9258_12_10354
 2002_277_0021-9258_28_25431
 2002_277_0021-9258_4_2702
 2002_30_0305-1048_23_5205
 2002_30_0305-1048_23_5205
 2002_71_0066-4154__333
 2002_76_0022-538X_20_10320
 2002_76_0022-538X_20_10320
 2002_76_0022-538X_7_3158
 2002_76_0022-538X_7_3158
 2002_7_1356-9597_6_523
 2002_7_1356-9597_6_523
 2002_9_1097-2765_3_481
 2003_22_0261-4189_3_704
 2003_22_0261-4189_3_704
 2003_23_0270-7306_14_5005
 2003_23_0270-7306_3_804
 2003_278_0021-9258_42_41528
 2003_278_0021-9258_42_41535
 2003_278_0021-9258_47_46440
 2003_31_0305-1048_2_619
 2003_31_0305-1048_2_619
 2003_52_1383-5769_1_41
 2003_63_0008-5472_21_7356
 2004_165_0021-9525_6_789
 2004_16_1040-4651_4_1035
 2004_24_0270-7306_23_10300
 2004_51_0950-382X_5_1413
 2004_574_0014-5793_1-3_192
 2004_5_1471-0072_10_848
 2004_6_1465-7392_10_954
 2005_102_0027-8424_24_8489
 2005_569_0027-5107_1-2_111
 
	Citances for PMID: 10541550
 1999_13_0890-9369_20_2639
 2000_10_0959-437X_2_178
 2000_10_0959-437X_2_178
 2000_10_0960-9822_24_1547
 2000_113_0021-9533_12_2111
 2000_129_1047-8477_2-3_186
 2000_14_0890-9369_14_1765
 2000_19_0261-4189_11_2728
 2000_19_0261-4189_11_2728
 2000_245_0378-1119_1_13
 2000_25_0968-0004_3_99
 2000_275_0021-9258_45_35233
 2000_28_0305-1048_3_843
 2000_28_0305-1048_3_843
 2000_69_0066-4154__829
 2001_105_0092-8674_3_297
 2001_106_0092-8674_3_287
 2001_110_0009-5915_3_159
 2001_11_0960-9822_18_1427
 2001_11_0960-9822_5_R178
 2001_128_0950-1991_24_5085
 2001_12_1059-1524_6_1671
 2001_15_0890-9369_2_134
 2001_20_0261-4189_15_4263
 2001_20_0261-4189_15_4263
 2001_20_0261-4189_16_4588
 2001_20_0261-4189_16_4588
 2001_21_0270-7306_15_4938
 2001_270_0378-1119_1-2_41
 2001_276_0021-9258_28_26666
 2001_276_0021-9258_31_29067
 2001_294_0036-8075_5540_96
 2001_29_0305-1048_3_809
 2001_29_0305-1048_3_809
 2001_3_1465-7392_3_289
 2001_52_0022-0957_355_193
 2001_6_1356-9597_10_837
 2001_98_0027-8424_18_10085
 2001_98_0027-8424_18_10085
 2001_98_0027-8424_21_11997
 2001_98_0027-8424_21_11997
 2001_98_0027-8424_24_13589
 2001_98_0027-8424_24_13589
 2002_111_0009-5915_5_291
 2002_12_0959-437X_2_243
 2002_12_0959-437X_2_243
 2002_13_1059-1524_2_607
 2002_140_1047-8477_1-3_17
 2002_159_0021-9525_2_225
 2002_16_0890-9369_6_659
 2002_21_0261-4189_13_3377
 2002_21_0261-4189_13_3377
 2002_22_0270-7306_24_8426
 2002_277_0021-9258_35_31430
 2002_420_0028-0836_6917_833
 2002_71_0066-4154__333
 2002_99_0027-8424_1_101
 2002_99_0027-8424_1_101
 2003_12_1097-2765_5_1067
 2003_14_1059-1524_6_2206
 2003_17_0890-9369_15_1894
 2003_22_0261-4189_13_3441
 2003_22_0261-4189_13_3441
 2003_22_0261-4189_4_964
 2003_22_0261-4189_4_964
 2003_23_0270-7306_14_5005
 2003_23_0270-7306_5_1832
 2003_278_0021-9258_44_42737
 2003_310_0378-1119__1
 2003_37_0066-4197__545
 2003_57_0066-4227__487
 2004_116_0092-8674_1_25
 2004_131_0950-1991_19_4807
 2004_131_0950-1991_9_2089
 2004_14_0960-9822_18_R778
 2004_15_1059-1524_8_3740
 2004_18_0890-9369_14_1667
 2004_18_0890-9369_24_3094
 2004_23_0261-4189_4_897
 2004_24_0270-7306_10_4138
 2004_24_0270-7306_23_10193
 2004_24_0270-7306_7_2958
 2004_38_0066-4197__273
 2004_430_0028-0836_6997_372
 2004_51_0950-382X_5_1413
 2004_5_1471-0072_10_848
 2004_6_1534-5807_1_145
 2004_6_1534-5807_1_4
 2005_16_1059-1524_6_2624
 2005_16_1084-9521_3_343
 2005_21_0168-9525_3_149
 2005_280_0021-9258_11_9848
 
	Citances for PMID: 9566895
 1998_10_0955-0674_6_742
 1998_10_0955-0674_6_742
 1998_18_0270-7306_5_2758
 1998_273_0021-9258_29_18205
 1998_273_0021-9258_42_27137
 1999_10_1059-1524_10_3263
 1999_10_1059-1524_8_2631
 1999_112_0021-9533_12_2011
 1999_152_0016-6731_3_839
 1999_18_0261-4189_2_396
 1999_18_0261-4189_2_396
 1999_19_0270-7306_1_646
 1999_1_1465-7392_7_415
 1999_1_1465-7392_7_E175
 1999_265_0014-2956_3_936
 1999_274_0021-9258_12_8291
 1999_274_0021-9258_13_9092
 1999_274_0021-9258_36_25927
 1999_436_1383-5742_1_1
 1999_447_0014-5793_2-3_292
 1999_96_0027-8424_11_6193
 1999_96_0027-8424_11_6193
 2000_10_0959-437X_2_178
 2000_10_0959-437X_2_178
 2000_10_0960-9822_4_195
 2000_113_0021-9533_11_1929
 2000_11_1059-1524_12_4117
 2000_129_1047-8477_2-3_186
 2000_14_0890-9369_18_2330
 2000_14_0890-9369_19_2526
 2000_19_0261-4189_11_2728
 2000_19_0261-4189_11_2728
 2000_20_0270-7306_22_8602
 2000_20_0270-7306_3_1021
 2000_275_0021-9258_18_13699
 2000_275_0021-9258_21_16235
 2000_275_0021-9258_45_34983
 2000_275_0021-9258_45_35233
 2000_275_0021-9258_8_5904
 2000_28_0305-1048_23_4769
 2000_28_0305-1048_23_4769
 2000_28_0305-1048_2_570
 2000_28_0305-1048_2_570
 2000_290_0036-8075_5500_2309
 2000_69_0066-4154__829
 2000_9_0964-6906_20_3001
 2000_9_0964-6906_20_3001
 2001_101_0009-2665_8_2511
 2001_11_0959-437X_1_64
 2001_11_0959-437X_1_64
 2001_11_0960-9822_9_R367
 2001_1471_0304-419X_3_M123
 2001_152_0021-9525_6_1267
 2001_20_0261-4189_13_3293
 2001_20_0261-4189_13_3293
 2001_20_0261-4189_15_4263
 2001_20_0261-4189_15_4263
 2001_20_0261-4189_17_4648
 2001_20_0261-4189_17_4648
 2001_21_0270-7306_15_4868
 2001_21_0270-7306_17_5767
 2001_21_0270-7306_2_624
 2001_21_0270-7306_5_1854
 2001_271_0014-4827_2_230
 2001_276_0021-9258_28_26666
 2001_276_0021-9258_29_26947
 2001_276_0021-9258_37_34428
 2001_276_0021-9258_3_1993
 2001_276_0021-9258_48_44905
 2001_276_0021-9258_51_48526
 2001_3_1465-7392_2_107
 2001_411_0028-0836_6841_1068
 2001_4_1368-7646_6_347
 2002_115_0021-9533_14_2829
 2002_12_0962-8924_2_72
 2002_13_1059-1524_11_3989
 2002_13_1059-1524_3_1030
 2002_13_1059-1524_4_1298
 2002_140_1047-8477_1-3_17
 2002_162_0168-9452_1_97
 2002_16_0890-9369_6_659
 2002_21_0261-4189_6_1437
 2002_21_0261-4189_6_1437
 2002_22_0270-7306_1_105
 2002_22_0270-7306_4_1036
 2002_22_0270-7306_6_1868
 2002_269_0014-2956_3_1040
 2002_277_0021-9258_12_10354
 2002_277_0021-9258_28_25431
 2002_277_0021-9258_4_2702
 2002_34_1357-2725_5_487
 2002_4_1465-7392_5_384
 2002_71_0066-4154__333
 2002_7_1356-9597_6_523
 2002_7_1356-9597_6_523
 2002_9_1097-2765_3_471
 2002_9_1097-2765_3_481
 2003_11_1097-2765_4_997
 2003_12_1097-2765_5_1067
 2003_160_0021-9525_2_177
 2003_1642_0167-4889_3_163
 2003_22_0261-4189_16_4294
 2003_22_0261-4189_16_4294
 2003_22_0261-4189_22_6115
 2003_22_0261-4189_22_6115
 2003_260_0012-1606_2_362
 2003_278_0021-9258_33_30854
 2003_278_0021-9258_42_40815
 2003_278_0021-9258_42_41528
 2003_278_0021-9258_52_52052
 2003_306_0006-291X_4_851
 2003_310_0378-1119__1
 2003_52_1383-5769_1_41
 2003_546_0014-5793_2-3_167
 2004_131_0950-1991_19_4807
 2004_14_0960-9822_18_R778
 2004_165_0002-9440_4_1351
 2004_165_0021-9525_2_181
 2004_24_0270-7306_13_5875
 2004_24_0270-7306_4_1614
 2004_279_0021-9258_10_9625
 2004_279_0021-9258_19_19691
 2004_279_0021-9258_29_30807
 2004_279_0021-9258_31_32569
 2004_66_0026-895X_1_153
 2005_204_0021-9541_2_381
 2005_24_0950-9232_17_2827
 2005_24_0950-9232_1_1
 2005_280_0021-9258_8_6253
 2005_569_0027-5107_1-2_111
 2005_58_0021-9746_5_525
 2005_6_1471-0072_6_476
 
	Citances for PMID: 8861912
 1996_274_0036-8075_5293_1659
 1996_87_0092-8674_2_287
 1997_11_0890-9369_21_2767
 1997_136_0021-9525_1_125
 1997_13_1046-2023_3_313
 1997_13_1081-0706__293
 1997_16_0261-4189_11_3312
 1997_16_0261-4189_11_3312
 1997_272_0021-9258_39_24508
 1997_283_0076-6879__549
 1997_2_1356-9597_7_467
 1997_46_0888-7543_2_294
 1997_51_0066-4227__125
 1997_79_0300-9084_9-10_541
 1997_7_0959-437X_2_152
 1997_7_0959-437X_2_152
 1997_7_0962-8924_1_9
 1997_88_0092-8674_4_493
 1997_90_0092-8674_4_649
 1997_91_0092-8674_1_59
 1997_91_0092-8674_3_311
 1997_94_0027-8424_11_5611
 1997_94_0027-8424_11_5611
 1997_94_0027-8424_26_14320
 1997_94_0027-8424_26_14320
 1997_94_0027-8424_7_3151
 1997_94_0027-8424_7_3151
 1997_94_0027-8424_8_3888
 1997_94_0027-8424_8_3888
 1997_9_0955-0674_3_358
 1997_9_0955-0674_3_358
 1998_10_0955-0674_3_304
 1998_10_0955-0674_3_304
 1998_10_0955-0674_6_742
 1998_10_0955-0674_6_742
 1998_12_0890-9369_13_1986
 1998_12_0890-9369_4_480
 1998_1398_0167-4781_2_113
 1998_140_0021-9525_2_271
 1998_17_0261-4189_10_2961
 1998_17_0261-4189_17_5182
 1998_17_0261-4189_17_5182
 1998_17_0261-4189_19_5699
 1998_17_0261-4189_19_5699
 1998_17_0261-4189_24_7219
 1998_17_0261-4189_24_7219
 1998_18_0270-7306_5_2758
 1998_1_1097-2765_4_519
 1998_238_0014-4827_1_63
 1998_245_0014-4827_2_282
 1998_26_0305-1048_10_2392
 1998_26_0305-1048_10_2392
 1998_273_0021-9258_14_8369
 1998_273_0021-9258_27_17095
 1998_273_0021-9258_38_24543
 1998_273_0021-9258_38_24891
 1998_273_0021-9258_42_27137
 1998_273_0021-9258_49_32421
 1998_279_0036-8075_5357_1733
 1998_281_0036-8075_5379_1005
 1998_3_1356-9597_11_737
 1998_8_0960-9822_6_347
 1998_92_0092-8674_3_295
 1998_93_0092-8674_6_1043
 1998_9_1059-1524_5_1163
 1999_10_1059-1524_12_4091
 1999_112_0021-9533_12_2011
 1999_13_0890-9369_10_1289
 1999_13_0890-9369_20_2639
 1999_151_0016-6731_4_1445
 1999_18_0261-4189_2_396
 1999_18_0261-4189_2_396
 1999_18_0261-4189_9_2435
 1999_18_0261-4189_9_2435
 1999_18_1046-2023_3_407
 1999_19_0270-7306_10_7228
 1999_23_0896-6273_1_45
 1999_264_0014-2956_2_415
 1999_274_0021-9258_33_23027
 1999_274_0021-9258_36_25927
 1999_447_0014-5793_2-3_292
 1999_68_0066-4154__649
 1999_96_0027-8424_22_12367
 1999_96_0027-8424_22_12367
 1999_96_0027-8424_6_2656
 1999_96_0027-8424_6_2656
 1999_9_0960-9822_4_211
 2000_10_0960-9822_24_1547
 2000_113_0021-9533_11_1929
 2000_129_1047-8477_2-3_186
 2000_129_1047-8477_2-3_198
 2000_14_0890-9369_12_1528
 2000_14_0890-9369_19_2526
 2000_158_0168-9452_1-2_33
 2000_19_0261-4189_11_2728
 2000_19_0261-4189_11_2728
 2000_19_0261-4189_7_1681
 2000_19_0261-4189_7_1681
 2000_275_0021-9258_12_8426
 2000_275_0021-9258_21_16235
 2000_275_0021-9258_45_34983
 2000_275_0021-9258_45_35233
 2000_275_0021-9258_4_2491
 2000_275_0021-9258_6_4239
 2000_275_0021-9258_8_5904
 2000_28_0305-1048_23_4769
 2000_28_0305-1048_23_4769
 2000_28_0305-1048_2_472
 2000_28_0305-1048_2_472
 2000_296_0022-2836_3_769
 2000_5_1356-9597_12_975
 2000_69_0066-4154__829
 2000_97_0027-8424_4_1530
 2000_97_0027-8424_4_1530
 2001_12_1059-1524_6_1671
 2001_152_0021-9525_1_15
 2001_152_0021-9525_6_1267
 2001_20_0261-4189_13_3293
 2001_20_0261-4189_13_3293
 2001_20_0261-4189_17_4648
 2001_20_0261-4189_17_4648
 2001_276_0021-9258_28_26666
 2001_276_0021-9258_31_29067
 2001_276_0021-9258_9_6337
 2001_3_1465-7392_2_107
 2001_52_0022-0957_355_183
 2001_98_0027-8424_24_13589
 2001_98_0027-8424_24_13589
 2002_115_0021-9533_1_51
 2002_12_0960-9822_8_678
 2002_13_1059-1524_2_607
 2002_16_0890-9369_6_659
 2002_21_0261-4189_20_5567
 2002_21_0261-4189_20_5567
 2002_21_0261-4189_6_1437
 2002_21_0261-4189_6_1437
 2002_22_0270-7306_1_105
 2002_22_0270-7306_4_1036
 2002_274_0014-4827_2_334
 2002_277_0021-9258_12_10354
 2002_277_0021-9258_19_16920
 2002_277_0021-9258_36_33049
 2002_277_0021-9258_4_2702
 2002_30_0305-1048_19_4176
 2002_30_0305-1048_19_4176
 2002_320_0022-2836_4_741
 2002_71_0066-4154__333
 2002_9_1097-2765_2_233
 2003_17_0890-9369_15_1894
 2003_22_0261-4189_13_3441
 2003_22_0261-4189_13_3441
 2003_23_0270-7306_19_6769
 2003_278_0021-9258_47_46440
 2003_278_0021-9258_49_48524
 2003_288_0014-4827_2_225
 2003_310_0378-1119__1
 2003_31_0305-1048_2_570
 2003_31_0305-1048_2_570
 2003_52_1383-5769_1_41
 2004_101_0027-8424_52_17952
 2004_101_0027-8424_52_17952
 2004_116_0092-8674_1_25
 2004_117_0021-9533_21_4909
 2004_165_0021-9525_2_181
 2004_279_0021-9258_27_28071
 2004_295_0014-4827_1_138
 2004_36_1061-4036_6_559
 2005_102_0027-8424_11_3942
 2005_24_0261-4189_2_395
 2005_280_0021-9258_13_13071
 2005_280_0021-9258_8_6285
 2005_33_0305-1048_2_765
 
	Citances for PMID: 10835370
 2000_19_0261-4189_11_2728
 2000_19_0261-4189_11_2728
 2000_20_0270-7306_22_8602
 2000_275_0021-9258_45_35233
 2000_290_0036-8075_5500_2309
 2001_104_0092-8674_5_643
 2001_114_0021-9533_11_2027
 2001_20_0261-4189_15_4263
 2001_20_0261-4189_15_4263
 2001_20_0261-4189_16_4588
 2001_20_0261-4189_16_4588
 2001_21_0270-7306_23_8095
 2001_21_0270-7306_2_624
 2001_271_0014-4827_2_230
 2001_276_0021-9258_28_26666
 2001_276_0021-9258_31_29067
 2001_276_0021-9258_9_6337
 2002_115_0021-9533_1_51
 2002_12_0959-437X_2_243
 2002_12_0959-437X_2_243
 2002_12_0962-8924_2_72
 2002_13_1059-1524_2_607
 2002_13_1059-1524_4_1298
 2002_140_1047-8477_1-3_17
 2002_16_0890-9369_6_659
 2002_21_0261-4189_20_5567
 2002_21_0261-4189_20_5567
 2002_21_0261-4189_6_1437
 2002_21_0261-4189_6_1437
 2002_22_0270-7306_1_105
 2002_22_0270-7306_4_1036
 2002_277_0021-9258_4_2702
 2002_30_0305-1048_23_5205
 2002_30_0305-1048_23_5205
 2002_419_0028-0836_6908_722
 2002_71_0066-4154__333
 2002_9_1097-2765_3_481
 2003_116_0021-9533_19_3971
 2003_12_1097-2765_5_1067
 2003_17_0890-9369_15_1894
 2003_22_0261-4189_16_4294
 2003_22_0261-4189_16_4294
 2003_310_0378-1119__1
 2003_327_0022-2836_1_111
 2004_23_0261-4189_13_2651
 2004_24_0270-7306_13_5875
 2005_579_0014-5793_4_877
 
	Citances for PMID: 11102449
 2001_20_0261-4189_15_4263
 2001_20_0261-4189_15_4263
 2001_20_0261-4189_16_4588
 2001_20_0261-4189_16_4588
 2001_21_0270-7306_23_8095
 2001_271_0014-4827_2_230
 2001_276_0021-9258_28_26317
 2001_276_0021-9258_28_26666
 2001_276_0021-9258_31_29067
 2001_276_0021-9258_9_6337
 2002_12_0959-437X_2_243
 2002_12_0959-437X_2_243
 2002_12_0962-8924_2_72
 2002_16_0890-9369_6_659
 2002_21_0261-4189_20_5567
 2002_21_0261-4189_20_5567
 2002_21_0261-4189_6_1437
 2002_21_0261-4189_6_1437
 2002_22_0270-7306_1_105
 2002_22_0270-7306_4_1036
 2002_269_0014-2956_3_1040
 2002_277_0021-9258_12_10354
 2002_277_0021-9258_35_31430
 2002_30_0305-1048_19_4176
 2002_30_0305-1048_19_4176
 2002_30_0305-1048_23_5205
 2002_30_0305-1048_23_5205
 2002_71_0066-4154__333
 2002_9_1097-2765_3_481
 2003_116_0021-9533_19_3971
 2003_12_1097-2765_5_1067
 2003_17_0890-9369_15_1894
 2003_22_0261-4189_16_4294
 2003_22_0261-4189_16_4294
 2003_23_0270-7306_14_5005
 2003_278_0021-9258_42_41528
 2003_305_0006-291X_2_412
 2003_310_0378-1119__1
 2003_327_0022-2836_1_111
 2004_117_0021-9533_22_5221
 2004_14_0960-9822_18_R778
 2004_23_0261-4189_13_2651
 2004_23_0261-4189_1_191
 2004_24_0270-7306_13_5875
 2004_279_0021-9258_40_41686
 2004_315_0006-291X_4_1011
 2005_16_1059-1524_6_2624
 2005_18_1097-2765_6_623
 2005_280_0021-9258_16_16143
 2005_280_0021-9258_30_27587
 2005_44_0006-2960_21_7885
 
	Citances for PMID: 11046155
 2000_20_0270-7306_22_8602
 2001_104_0092-8674_5_643
 2001_11_0960-9822_9_R367
 2001_13_1040-4651_12_2671
 2001_20_0261-4189_15_4263
 2001_20_0261-4189_15_4263
 2001_20_0261-4189_17_4648
 2001_20_0261-4189_17_4648
 2001_20_0261-4189_17_4836
 2001_20_0261-4189_17_4836
 2001_21_0270-7306_10_3576
 2001_21_0270-7306_11_3820
 2001_276_0021-9258_28_26317
 2001_276_0021-9258_29_26947
 2001_276_0021-9258_37_34428
 2001_276_0021-9258_48_44905
 2001_98_0027-8424_18_10085
 2001_98_0027-8424_18_10085
 2002_115_0021-9533_1_51
 2002_115_0021-9533_7_1435
 2002_12_0962-8924_2_72
 2002_13_1059-1524_4_1298
 2002_13_1059-1524_5_1536
 2002_159_0021-9525_2_225
 2002_16_0890-9369_2_198
 2002_16_0890-9369_5_571
 2002_21_0261-4189_6_1437
 2002_21_0261-4189_6_1437
 2002_21_0950-9232_11_1777
 2002_22_0270-7306_19_6767
 2002_22_0270-7306_1_105
 2002_22_0270-7306_4_1036
 2002_269_0014-2956_3_1040
 2002_277_0014-4827_1_119
 2002_277_0021-9258_12_10354
 2002_277_0021-9258_28_25431
 2002_30_0305-1048_11_2261
 2002_30_0305-1048_11_2261
 2002_30_0305-1048_19_4176
 2002_30_0305-1048_19_4176
 2002_30_0305-1048_22_4815
 2002_30_0305-1048_22_4815
 2002_30_1061-4036_3_290
 2002_3_1469-221X_8_780
 2002_419_0028-0836_6908_718
 2002_4_1465-7392_7_523
 2002_71_0066-4154__333
 2002_7_1356-9597_6_523
 2002_7_1356-9597_6_523
 2002_99_0027-8424_3_1347
 2002_99_0027-8424_3_1347
 2002_9_1097-2765_3_481
 2003_100_0027-8424_23_13225
 2003_100_0027-8424_23_13225
 2003_113_0092-8674_1_115
 2003_114_0092-8674_1_99
 2003_114_0092-8674_2_255
 2003_114_0092-8674_4_431
 2003_116_0021-9533_19_3971
 2003_12_1097-2765_5_1067
 2003_14_1044-0305_7_696
 2003_160_0021-9525_2_177
 2003_17_0890-9369_15_1894
 2003_22_0261-4189_14_3715
 2003_22_0261-4189_14_3715
 2003_278_0021-9258_10_8795
 2003_278_0021-9258_11_9754
 2003_278_0021-9258_27_25207
 2003_278_0021-9258_32_30051
 2003_278_0021-9258_33_30854
 2003_278_0021-9258_36_34475
 2003_278_0021-9258_49_48524
 2003_310_0378-1119__1
 2003_31_0305-1048_19_5568
 2003_31_0305-1048_19_5568
 2003_31_0305-1048_2_619
 2003_31_0305-1048_2_619
 2003_332_0022-2836_1_85
 2003_35_1061-4036_1_9
 2003_37_0899-1987_2_65
 2003_42_0006-2960_23_7205
 2003_4_1469-221X_1_42
 2003_4_1469-221X_1_42
 2003_5_1465-7392_11_1008
 2003_77_0022-538X_4_2369
 2003_77_0022-538X_4_2369
 2004_117_0021-9533_17_3807
 2004_117_0021-9533_21_4909
 2004_117_0021-9533_22_5221
 2004_117_0021-9533_24_5875
 2004_14_0960-9822_18_R778
 2004_14_1097-2765_6_713
 2004_165_0021-9525_2_181
 2004_165_0021-9525_6_789
 2004_167_0021-9525_1_51
 2004_16_1097-2765_1_81
 2004_22_0734-9750_8_621
 2004_23_0261-4189_13_2651
 2004_23_0261-4189_13_2674
 2004_23_0261-4189_15_3154
 2004_23_0261-4189_19_3886
 2004_23_0261-4189_23_4627
 2004_24_0270-7306_11_4696
 2004_24_0270-7306_12_5404
 2004_24_0270-7306_4_1614
 2004_279_0021-9258_14_13346
 2004_279_0021-9258_16_16433
 2004_279_0021-9258_29_30807
 2004_279_0021-9258_34_35879
 2004_295_0014-4827_1_138
 2004_32_0305-1048_16_4821
 2004_32_0305-1048_16_4821
 2004_3_1568-7864_5_505
 2004_68_1092-2172_1_109
 2004_6_1465-7392_10_991
 2004_78_0022-538X_18_10074
 2004_78_0022-538X_18_10074
 2004_83_0888-7543_1_66
 2005_121_0092-8674_6_859
 2005_19_0890-9369_11_1269
 2005_205_0022-3417_3_318
 2005_24_0950-9232_17_2827
 2005_25_0270-7306_4_1560
 2005_280_0021-9258_13_12976
 2005_280_0021-9258_30_27624
 2005_33_0305-1048_2_765
 2005_44_0006-2960_21_7885
 2005_569_0027-5107_1-2_111
 2005_6_1471-0072_6_476
 2005_72_0006-3363_1_188
 2005_72_0006-3363_1_188
 
	Citances for PMID: 8943353
 1997_25_0305-1048_24_4915
 1997_25_0305-1048_24_4915
 1997_25_0305-1048_24_4921
 1997_25_0305-1048_24_4921
 1997_272_0021-9258_48_30483
 1997_283_0076-6879__205
 1997_94_0027-8424_10_4948
 1997_94_0027-8424_10_4948
 1997_94_0027-8424_14_7245
 1997_94_0027-8424_14_7245
 1998_12_0890-9369_14_2120
 1998_12_0890-9369_15_2245
 1998_12_0890-9369_15_2278
 1998_18_0270-7306_11_6679
 1998_18_0270-7306_1_141
 1998_18_0270-7306_5_2758
 1998_273_0021-9258_36_23248
 1998_273_0021-9258_42_27137
 1998_273_0021-9258_49_32421
 1998_8_0959-437X_1_28
 1998_8_0959-437X_1_28
 1998_95_0027-8424_7_3603
 1998_95_0027-8424_7_3603
 1999_13_0890-9369_10_1289
 1999_13_0890-9369_7_827
 1999_18_0261-4189_9_2435
 1999_18_0261-4189_9_2435
 1999_18_0950-9232_11_2003
 1999_18_0950-9232_14_2299
 1999_19_0270-7306_7_4739
 1999_19_0270-7306_7_5083
 1999_19_0270-7306_9_6379
 1999_237_0378-1119_2_281
 1999_258_0042-6822_2_257
 1999_274_0021-9258_33_23027
 1999_73_0022-538X_4_3154
 1999_73_0022-538X_4_3154
 1999_96_0027-8424_12_6626
 1999_96_0027-8424_12_6626
 2000_11_1044-9523_10_507
 2000_1470_0304-419X_1_M1
 2000_148_0021-9525_6_1187
 2000_1492_0167-4781_2-3_341
 2000_14_0890-9369_19_2393
 2000_19_0950-9232_16_2067
 2000_20_0270-7306_1_363
 2000_275_0021-9258_15_11154
 2000_275_0021-9258_45_34983
 2000_275_0021-9258_45_35233
 2000_28_0305-1048_7_1525
 2000_28_0305-1048_7_1525
 2000_74_0022-538X_5_2084
 2000_74_0022-538X_5_2084
 2000_74_0022-538X_9_4192
 2000_74_0022-538X_9_4192
 2000_96_0006-4971_2_475
 2001_15_1074-7613_6_959
 2001_20_0950-9232_31_4115
 2001_271_0014-4827_2_230
 2001_276_0021-9258_13_9662
 2001_276_0021-9258_20_17559
 2001_276_0021-9258_28_26666
 2001_276_0021-9258_29_26947
 2001_276_0021-9258_9_6337
 2001_280_0006-291X_1_368
 2001_29_0305-1048_13_2810
 2001_29_0305-1048_13_2810
 2001_490_0014-5793_3_123
 2002_16_0890-9369_6_659
 2002_17_1043-4666_2_91
 2002_21_0261-4189_12_3171
 2002_21_0261-4189_12_3171
 2002_277_0021-9258_12_10354
 2002_277_0021-9258_31_27668
 2002_76_0022-538X_11_5369
 2002_76_0022-538X_11_5369
 2002_76_0022-538X_7_3158
 2002_76_0022-538X_7_3158
 2002_9_1097-2765_3_481
 2003_22_0261-4189_22_6115
 2003_22_0261-4189_22_6115
 2003_278_0021-9258_10_8826
 2003_278_0021-9258_42_41528
 2003_278_0021-9258_42_41535
 2003_310_0378-1119__1
 2003_4_1469-221X_1_42
 2003_4_1469-221X_1_42
 2004_14_0960-9822_18_R778
 2004_16_1040-4651_4_1035
 2004_23_0950-9232_21_3802
 2004_574_0014-5793_1-3_192
 2005_280_0021-9258_13_12643
 2005_280_0021-9258_30_27624
 
	Citances for PMID: 8955071
 1996_271_0021-9258_51_32503
 1997_13_1081-0706__293
 1998_1398_0167-4781_2_113
 1998_244_0014-4827_2_372
 1998_273_0021-9258_49_32421
 1999_18_0261-4189_9_2435
 1999_18_0261-4189_9_2435
 1999_264_0014-2956_2_415
 1999_9_0960-9822_7_373
 2000_275_0021-9258_8_5904
 2000_69_0066-4154__829
 2001_21_0270-7306_2_624
 2001_271_0014-4827_2_230
 2003_52_1383-5769_1_41
 2004_24_0270-7306_13_5875
 
	Citances for PMID: 9417919
 1997_46_0888-7543_2_294
 1998_10_0955-0674_6_742
 1998_10_0955-0674_6_742
 1998_273_0021-9258_42_27137
 1998_273_0021-9258_49_32421
 1998_281_0036-8075_5379_1005
 1999_13_0890-9369_10_1289
 1999_23_0896-6273_1_45
 1999_274_0021-9258_33_23027
 2000_154_0016-6731_2_599
 2000_275_0021-9258_45_34983
 2000_275_0021-9258_45_35233
 2000_275_0021-9258_8_5904
 2000_28_1045-2257_3_235
 2000_5_1356-9597_6_481
 2000_69_0066-4154__829
 2001_276_0021-9258_29_26947
 2001_276_0021-9258_31_29067
 2001_44_0009-9201_2_335
 2001_77_0888-7543_3_171
 2002_137_0165-4608_2_133
 2002_9_1097-2765_3_481
 2003_278_0021-9258_42_41535
 2004_279_0021-9258_9_8469
 2005_158_0165-4608_1_1
 
	Citances for PMID: 9353276
 1997_272_0021-9258_45_28247
 1998_10_0955-0674_6_742
 1998_10_0955-0674_6_742
 1998_18_0270-7306_5_2758
 1998_273_0021-9258_29_18205
 1998_273_0021-9258_42_27137
 1998_273_0021-9258_49_32421
 1998_2_1097-2765_1_23
 1999_13_0890-9369_10_1289
 1999_13_0890-9369_20_2639
 1999_23_0896-6273_1_45
 1999_274_0021-9258_33_23027
 1999_274_0021-9258_36_25927
 1999_68_0066-4154__649
 1999_96_0027-8424_22_12367
 1999_96_0027-8424_22_12367
 1999_96_0027-8424_6_2656
 1999_96_0027-8424_6_2656
 2000_20_0270-7306_22_8602
 2000_275_0021-9258_37_29042
 2000_275_0021-9258_45_34983
 2000_275_0021-9258_45_35233
 2000_275_0021-9258_8_5904
 2000_287_0036-8075_5460_2023
 2000_5_1356-9597_6_481
 2000_69_0066-4154__829
 2001_106_0092-8674_3_287
 2001_20_0261-4189_16_4588
 2001_20_0261-4189_16_4588
 2001_276_0021-9258_28_26666
 2001_276_0021-9258_29_26947
 2001_276_0021-9258_31_29067
 2001_98_0027-8424_18_10085
 2001_98_0027-8424_18_10085
 2001_98_0027-8424_9_4938
 2001_98_0027-8424_9_4938
 2002_22_0270-7306_4_1036
 2002_277_0021-9258_12_10354
 2002_277_0021-9258_28_25431
 2002_277_0021-9258_4_2702
 2002_71_0066-4154__333
 2002_9_1097-2765_3_481
 2003_22_0261-4189_3_704
 2003_22_0261-4189_3_704
 2003_278_0021-9258_42_41528
 2003_278_0021-9258_42_41535
 2003_31_0305-1048_2_619
 2003_31_0305-1048_2_619
 2003_327_0022-2836_1_111
 2004_574_0014-5793_1-3_192
 2005_280_0021-9258_30_27624
 2005_44_0006-2960_21_7885
 2005_569_0027-5107_1-2_111
 
	Citances for PMID: 8552193
 1996_271_0021-9258_34_20868
 1996_271_0021-9258_51_32503
 1996_274_0036-8075_5293_1659
 1996_6_0960-9822_11_1416
 1996_6_0960-9822_12_1592
 1996_87_0092-8674_1_53
 1996_87_0092-8674_2_287
 1996_8_0955-0674_6_815
 1996_8_0955-0674_6_815
 1996_93_0027-8424_19_9997
 1997_136_0021-9525_6_1201
 1997_137_0021-9525_1_183
 1997_13_1046-2023_3_221
 1997_13_1046-2023_3_313
 1997_13_1081-0706__293
 1997_16_0261-4189_14_4340
 1997_16_0261-4189_14_4340
 1997_25_0305-1048_3_530
 1997_25_0305-1048_3_530
 1997_272_0021-9258_39_24508
 1997_275_0036-8075_5302_993
 1997_277_0036-8075_5332_1672
 1997_283_0076-6879__44
 1997_283_0076-6879__549
 1997_46_0888-7543_2_294
 1997_51_0066-4227__125
 1997_79_0300-9084_9-10_541
 1997_7_0959-437X_2_152
 1997_7_0959-437X_2_152
 1997_7_0962-8924_1_9
 1997_88_0092-8674_4_493
 1997_91_0092-8674_3_311
 1997_94_0027-8424_11_5611
 1997_94_0027-8424_11_5611
 1997_94_0027-8424_1_142
 1997_94_0027-8424_1_142
 1997_94_0027-8424_26_14320
 1997_94_0027-8424_26_14320
 1997_94_0027-8424_8_3888
 1997_94_0027-8424_8_3888
 1997_9_0955-0674_3_358
 1997_9_0955-0674_3_358
 1998_10_0955-0674_3_304
 1998_10_0955-0674_3_304
 1998_10_0955-0674_6_742
 1998_10_0955-0674_6_742
 1998_12_0890-9369_4_480
 1998_1398_0167-4781_2_113
 1998_140_0021-9525_2_271
 1998_149_0016-6731_3_1221
 1998_17_0261-4189_24_7219
 1998_17_0261-4189_24_7219
 1998_18_0270-7306_5_2758
 1998_18_0270-7306_9_5511
 1998_1_1097-2765_4_519
 1998_26_0305-1048_10_2392
 1998_26_0305-1048_10_2392
 1998_273_0021-9258_35_22177
 1998_273_0021-9258_38_24891
 1998_273_0021-9258_42_27137
 1998_273_0021-9258_49_32421
 1998_279_0036-8075_5357_1733
 1998_93_0092-8674_6_1043
 1998_9_1059-1524_2_345
 1998_9_1059-1524_5_1163
 1999_10_1059-1524_12_4091
 1999_13_0890-9369_10_1289
 1999_13_0890-9369_16_2159
 1999_13_0890-9369_20_2639
 1999_146_0021-9525_4_709
 1999_151_0016-6731_4_1445
 1999_152_0016-6731_3_839
 1999_18_0261-4189_13_3808
 1999_18_0261-4189_13_3808
 1999_18_0261-4189_2_396
 1999_18_0261-4189_2_396
 1999_18_0261-4189_9_2435
 1999_18_0261-4189_9_2435
 1999_18_1046-2023_3_407
 1999_19_0270-7306_10_6699
 1999_19_0270-7306_10_7228
 1999_19_0270-7306_7_4888
 1999_23_0896-6273_1_45
 1999_264_0014-2956_2_415
 1999_274_0021-9258_33_23027
 1999_447_0014-5793_2-3_292
 1999_68_0066-4154__649
 1999_96_0027-8424_6_2656
 1999_96_0027-8424_6_2656
 1999_96_0027-8424_6_2800
 1999_96_0027-8424_6_2800
 1999_9_0960-9822_4_211
 2000_10_0960-9822_24_1547
 2000_113_0021-9533_11_1929
 2000_129_1047-8477_2-3_186
 2000_129_1047-8477_2-3_198
 2000_149_0021-9525_6_1179
 2000_19_0261-4189_11_2728
 2000_19_0261-4189_11_2728
 2000_275_0021-9258_12_8426
 2000_275_0021-9258_20_15049
 2000_275_0021-9258_3_1615
 2000_275_0021-9258_45_35233
 2000_275_0021-9258_6_4239
 2000_275_0021-9258_8_5904
 2000_28_0305-1048_2_472
 2000_28_0305-1048_2_472
 2000_28_0305-1048_2_570
 2000_28_0305-1048_2_570
 2000_296_0022-2836_3_769
 2000_69_0066-4154__829
 2001_106_0092-8674_3_287
 2001_152_0021-9525_6_1267
 2001_20_0261-4189_13_3293
 2001_20_0261-4189_13_3293
 2001_21_0270-7306_17_5767
 2001_276_0021-9258_28_26666
 2001_276_0021-9258_4_2708
 2001_276_0021-9258_51_48526
 2001_3_1465-7392_8_715
 2001_98_0027-8424_18_10085
 2001_98_0027-8424_18_10085
 2002_111_0009-5915_5_291
 2002_13_1059-1524_2_607
 2002_13_1059-1524_4_1298
 2002_140_1047-8477_1-3_17
 2002_16_0890-9369_6_659
 2002_21_0261-4189_6_1437
 2002_21_0261-4189_6_1437
 2002_22_0270-7306_1_105
 2002_249_0012-1606_1_156
 2002_274_0014-4827_2_334
 2002_277_0021-9258_36_33049
 2002_277_0021-9258_4_2702
 2002_71_0066-4154__333
 2003_22_0261-4189_13_3441
 2003_22_0261-4189_13_3441
 2003_23_0270-7306_14_5005
 2003_23_0270-7306_19_6769
 2003_260_0012-1606_2_362
 2003_278_0021-9258_42_41083
 2003_278_0021-9258_42_41528
 2003_278_0021-9258_42_41535
 2003_278_0021-9258_47_46440
 2003_288_0014-4827_2_225
 2003_31_0305-1048_2_619
 2003_31_0305-1048_2_619
 2004_116_0092-8674_1_25
 2004_23_0261-4189_13_2651
 2004_24_0270-7306_22_9968
 2004_6_1465-7392_8_721
 2005_102_0027-8424_1_69
 
	Citances for PMID: 9733795
 1998_273_0021-9258_38_24891
 1999_13_0890-9369_10_1289
 1999_13_0890-9369_20_2639
 1999_23_0896-6273_1_45
 1999_274_0021-9258_33_23027
 2000_129_1047-8477_2-3_186
 2000_19_0261-4189_11_2728
 2000_19_0261-4189_11_2728
 2000_275_0021-9258_45_35233
 2000_275_0021-9258_8_5904
 2000_69_0066-4154__829
 2001_20_0261-4189_15_4263
 2001_20_0261-4189_15_4263
 2001_276_0021-9258_28_26666
 2001_276_0021-9258_4_2708
 2002_22_0270-7306_1_105
 2003_22_0261-4189_13_3441
 2003_22_0261-4189_13_3441
 2003_310_0378-1119__1
 2003_31_0305-1048_2_619
 2003_31_0305-1048_2_619
 2004_24_0270-7306_13_5875
 
	Citances for PMID: 7774008
 1995_5_0960-9822_9_1009
 1995_81_0092-8674_5_667
 1995_83_0092-8674_3_397
 1995_83_0092-8674_4_563
 1995_92_0027-8424_26_12475
 1995_92_0027-8424_26_12475
 1996_12_0168-9525_10_405
 1996_24_0305-1048_5_816
 1996_24_0305-1048_5_816
 1996_271_0021-9258_34_20868
 1996_271_0021-9258_51_32503
 1996_274_0036-8075_5293_1659
 1996_6_0959-437X_2_203
 1996_6_0959-437X_2_203
 1996_6_0959-437X_2_208
 1996_6_0959-437X_2_208
 1996_6_0960-9822_11_1416
 1996_6_0960-9822_3_229
 1996_6_0962-8924_5_184
 1996_85_0092-8674_1_39
 1996_85_0092-8674_6_785
 1996_87_0092-8674_1_53
 1996_87_0092-8674_2_287
 1996_8_0955-0674_3_354
 1996_8_0955-0674_3_354
 1996_8_0955-0674_6_815
 1996_8_0955-0674_6_815
 1996_93_0027-8424_19_9997
 1996_93_0027-8424_21_11569
 1996_93_0027-8424_4_1566
 1996_93_0027-8424_4_1566
 1997_11_0890-9369_24_3375
 1997_137_0021-9525_1_183
 1997_13_1081-0706__293
 1997_16_0261-4189_14_4340
 1997_16_0261-4189_14_4340
 1997_16_0261-4189_19_5966
 1997_16_0261-4189_19_5966
 1997_16_0261-4189_2_318
 1997_16_0261-4189_2_318
 1997_25_0305-1048_21_4250
 1997_25_0305-1048_21_4250
 1997_25_0305-1048_3_530
 1997_25_0305-1048_3_530
 1997_51_0066-4227__125
 1997_7_0959-437X_2_152
 1997_7_0959-437X_2_152
 1997_88_0092-8674_4_493
 1997_91_0092-8674_1_59
 1997_91_0092-8674_3_311
 1997_94_0027-8424_11_5611
 1997_94_0027-8424_11_5611
 1997_94_0027-8424_1_142
 1997_94_0027-8424_1_142
 1997_94_0027-8424_20_10729
 1997_94_0027-8424_20_10729
 1997_94_0027-8424_20_10786
 1997_94_0027-8424_20_10786
 1997_94_0027-8424_26_14320
 1997_94_0027-8424_26_14320
 1997_94_0027-8424_8_3888
 1997_94_0027-8424_8_3888
 1997_9_0955-0674_3_358
 1997_9_0955-0674_3_358
 1998_12_0890-9369_18_2956
 1998_1398_0167-4781_2_113
 1998_140_0021-9525_2_271
 1998_17_0261-4189_10_2961
 1998_17_0261-4189_24_7219
 1998_17_0261-4189_24_7219
 1998_18_0270-7306_11_6679
 1998_18_0270-7306_1_141
 1998_18_0270-7306_3_1296
 1998_18_0270-7306_5_2758
 1998_273_0021-9258_35_22177
 1998_273_0021-9258_3_1298
 1998_273_0021-9258_42_27137
 1998_273_0021-9258_49_32421
 1998_279_0036-8075_5347_95
 1998_279_0036-8075_5357_1733
 1998_3_1356-9597_11_737
 1998_62_1092-2172_4_1191
 1998_92_0092-8674_3_295
 1998_95_0027-8424_25_14757
 1998_95_0027-8424_25_14757
 1998_95_0027-8424_5_2384
 1998_95_0027-8424_5_2384
 1998_95_0027-8424_7_3603
 1998_95_0027-8424_7_3603
 1998_9_1059-1524_1_15
 1998_9_1059-1524_5_1163
 1999_10_1059-1524_8_2631
 1999_13_0890-9369_16_2159
 1999_151_0016-6731_1_31
 1999_151_0016-6731_4_1445
 1999_152_0016-6731_3_839
 1999_18_0261-4189_13_3808
 1999_18_0261-4189_13_3808
 1999_18_0261-4189_19_5334
 1999_18_0261-4189_19_5334
 1999_18_0261-4189_2_396
 1999_18_0261-4189_2_396
 1999_18_1046-2023_3_407
 1999_19_0270-7306_10_7228
 1999_19_0270-7306_2_1226
 1999_23_0896-6273_1_45
 1999_274_0021-9258_12_8291
 1999_274_0021-9258_13_9092
 1999_3_1097-2765_4_477
 1999_447_0014-5793_2-3_292
 1999_68_0066-4154__649
 1999_96_0027-8424_22_12367
 1999_96_0027-8424_22_12367
 1999_96_0027-8424_2_441
 1999_96_0027-8424_2_441
 1999_96_0027-8424_6_2656
 1999_96_0027-8424_6_2656
 1999_96_0092-8674_3_415
 1999_9_1088-9051_1_27
 2000_10_0960-9822_24_1547
 2000_11_1059-1524_12_4117
 2000_11_1059-1524_5_1673
 2000_14_0890-9369_13_1631
 2000_14_0890-9369_8_913
 2000_154_0016-6731_4_1523
 2000_19_0261-4189_9_2082
 2000_19_0261-4189_9_2082
 2000_20_0270-7306_22_8602
 2000_20_0270-7306_3_1021
 2000_275_0021-9258_13_9734
 2000_275_0021-9258_45_34983
 2000_275_0021-9258_8_5904
 2000_28_0305-1048_20_3897
 2000_28_0305-1048_20_3897
 2000_28_0305-1048_23_4769
 2000_28_0305-1048_23_4769
 2000_439_0031-6768_3_R94
 2000_4_1367-5931_5_581
 2000_5_1356-9597_12_975
 2000_69_0066-4154__829
 2000_6_1097-2765_3_637
 2000_97_0027-8424_4_1530
 2000_97_0027-8424_4_1530
 2001_12_1059-1524_11_3317
 2001_13_1040-4651_12_2671
 2001_152_0021-9525_6_1267
 2001_15_0890-9369_2_147
 2001_18_0749-503X_4_291
 2001_20_0261-4189_15_4263
 2001_20_0261-4189_15_4263
 2001_20_0261-4189_17_4648
 2001_20_0261-4189_17_4648
 2001_21_0270-7306_15_4938
 2001_21_0270-7306_17_5767
 2001_276_0021-9258_28_26666
 2001_276_0021-9258_29_26947
 2001_276_0021-9258_9_6337
 2001_294_0036-8075_5549_2181
 2001_3_1465-7392_8_715
 2001_412_0028-0836_6844_355
 2001_4_1368-7646_6_347
 2001_6_1356-9597_10_837
 2001_98_0027-8424_20_11211
 2001_98_0027-8424_20_11211
 2002_109_0092-8674_7_849
 2002_13_1059-1524_2_607
 2002_161_0016-6731_2_521
 2002_16_0890-9369_19_2479
 2002_16_0890-9369_6_659
 2002_190_0021-9541_1_7
 2002_269_0014-2956_3_1040
 2002_277_0021-9258_18_16033
 2002_277_0021-9258_19_16920
 2002_277_0021-9258_43_40520
 2002_3_1471-0072_11_826
 2002_76_0022-538X_7_3158
 2002_76_0022-538X_7_3158
 2002_99_0027-8424_1_101
 2002_99_0027-8424_1_101
 2003_17_0890-9369_14_1741
 2003_17_0890-9369_15_1817
 2003_26_0168-6445_5_533
 2003_270_0014-2956_19_3880
 2003_278_0021-9258_11_9671
 2003_278_0021-9258_14_11818
 2003_278_0021-9258_47_46424
 2003_532_0027-5107_1-2_5
 2003_63_0008-5472_21_7356
 2004_101_0027-8424_43_15392
 2004_101_0027-8424_43_15392
 2004_113_0009-5915_3_113
 2004_131_0950-1991_19_4807
 2004_1677_0167-4781_1-3_142
 2004_167_0016-6731_2_579
 2004_18_0890-9369_7_769
 2004_24_0270-7306_4_1614
 2004_279_0021-9258_9_8469
 2004_38_0066-4197__273
 2004_68_1092-2172_1_109
 2005_25_0270-7306_4_1560
 2005_579_0014-5793_4_877
 
	Citances for PMID: 11323433
 2001_20_0261-4189_15_4263
 2001_20_0261-4189_15_4263
 2001_20_0261-4189_16_4588
 2001_20_0261-4189_16_4588
 2001_276_0021-9258_28_26666
 2001_276_0021-9258_51_48000
 2001_98_0027-8424_21_11997
 2001_98_0027-8424_21_11997
 2001_98_0027-8424_24_13589
 2001_98_0027-8424_24_13589
 2002_16_0890-9369_6_659
 2002_21_0261-4189_20_5567
 2002_21_0261-4189_20_5567
 2002_21_0261-4189_6_1437
 2002_21_0261-4189_6_1437
 2002_22_0270-7306_4_1036
 2002_277_0021-9258_19_16920
 2002_277_0021-9258_35_31430
 2002_30_0305-1048_23_5205
 2002_30_0305-1048_23_5205
 2002_3_1471-0072_11_826
 2002_71_0066-4154__333
 2002_76_0022-538X_7_3350
 2002_76_0022-538X_7_3350
 2002_9_1097-2765_3_481
 2003_100_0027-8424_16_9150
 2003_100_0027-8424_16_9150
 2003_116_0021-9533_19_3971
 2003_17_0890-9369_15_1894
 2003_23_0270-7306_14_5005
 2003_26_0168-6445_5_533
 2003_278_0021-9258_42_41528
 2003_278_0021-9258_42_41535
 2003_278_0021-9258_44_42737
 2003_310_0378-1119__1
 2003_31_0305-1048_2_619
 2003_31_0305-1048_2_619
 2003_327_0022-2836_1_111
 2003_52_1383-5769_1_41
 2003_77_0022-538X_4_2369
 2003_77_0022-538X_4_2369
 2004_101_0027-8424_52_17952
 2004_101_0027-8424_52_17952
 2004_16_1097-2765_6_967
 2004_23_0261-4189_13_2651
 2004_24_0270-7306_13_5875
 2004_305_0036-8075_5680_86
 2004_326_0042-6822_2_317
 2004_36_1061-4036_6_559
 2004_574_0014-5793_1-3_192
 2004_83_0888-7543_1_66
 2005_102_0027-8424_1_69
 2005_16_1059-1524_6_2624
 2005_280_0021-9258_13_12643
 2005_280_0021-9258_13_13071
 2005_6_1471-0072_6_476
 
	Citances for PMID: 9774682
 1998_18_0270-7306_11_6679
 1999_10_1059-1524_8_2631
 1999_18_0261-4189_2_396
 1999_18_0261-4189_2_396
 1999_18_0261-4189_7_1878
 1999_18_0261-4189_7_1878
 1999_19_0270-7306_7_5083
 1999_19_0270-7306_9_6379
 1999_1_1465-7392_2_88
 1999_274_0021-9258_39_27829
 1999_293_0022-2836_5_1005
 2000_113_0021-9533_11_1929
 2000_12_1040-4651_10_1987
 2000_1470_0304-419X_1_M1
 2000_1492_0167-4781_2-3_341
 2000_14_0890-9369_18_2330
 2000_14_0890-9369_7_804
 2000_19_0950-9232_20_2430
 2000_20_0270-7306_3_1021
 2000_275_0021-9258_11_7894
 2000_275_0021-9258_13_9797
 2000_275_0021-9258_9_6337
 2000_28_0305-1048_7_1525
 2000_28_0305-1048_7_1525
 2000_69_0066-4154__829
 2000_74_0022-538X_5_2084
 2000_74_0022-538X_5_2084
 2000_74_0022-538X_9_4192
 2000_74_0022-538X_9_4192
 2001_13_1040-4651_12_2671
 2001_20_0950-9232_11_1379
 2001_276_0021-9258_13_9662
 2001_276_0021-9258_1_28
 2001_276_0021-9258_20_17559
 2001_276_0021-9258_48_44905
 2001_29_0305-1048_13_2810
 2001_29_0305-1048_13_2810
 2001_6_1356-9597_1_57
 2002_115_0021-9533_7_1435
 2002_13_1059-1524_11_3989
 2002_13_1059-1524_5_1536
 2002_21_0261-4189_21_5775
 2002_21_0261-4189_21_5775
 2002_21_0950-9232_11_1777
 2002_277_0021-9258_28_25431
 2002_277_0021-9258_31_27668
 2002_277_0021-9258_35_31679
 2002_277_0021-9258_4_2702
 2002_283_0363-6135_1_H204
 2002_76_0022-538X_11_5369
 2002_76_0022-538X_11_5369
 2002_99_0027-8424_3_1347
 2002_99_0027-8424_3_1347
 2003_22_0950-9232_35_5387
 2003_22_0950-9232_48_7632
 2003_22_0950-9232_52_8472
 2003_23_0270-7306_7_2351
 2003_54_0022-0957_383_699
 2003_77_0022-538X_4_2369
 2003_77_0022-538X_4_2369
 2004_14_0960-9822_18_R778
 2004_165_0002-9440_4_1351
 2004_23_0261-4189_6_1336
 2004_32_0305-1048_14_4390
 2004_32_0305-1048_14_4390
 2004_32_0305-1048_14_4390
 2004_32_0305-1048_21_6454
 2004_32_0305-1048_21_6454
 2004_83_0888-7543_1_66
 2005_15_0960-9822_11_1051
 2005_280_0021-9258_13_12976
 
	Citances for PMID: 8990175
 1997_11_0890-9369_21_2767
 1997_13_1081-0706__293
 1997_94_0027-8424_1_142
 1997_94_0027-8424_1_142
 1997_94_0027-8424_20_10729
 1997_94_0027-8424_20_10729
 1997_94_0027-8424_26_14320
 1997_94_0027-8424_26_14320
 1997_9_0955-0674_3_358
 1997_9_0955-0674_3_358
 1998_12_0890-9369_14_2120
 1998_12_0890-9369_15_2245
 1998_17_0261-4189_10_2961
 1998_17_0261-4189_24_7219
 1998_17_0261-4189_24_7219
 1998_18_0270-7306_11_6679
 1998_18_0270-7306_5_2758
 1998_273_0021-9258_29_18205
 1998_273_0021-9258_36_23248
 1998_273_0021-9258_42_27137
 1998_273_0021-9258_49_32421
 1998_281_0036-8075_5379_1005
 1998_95_0027-8424_25_14932
 1998_95_0027-8424_25_14932
 1998_95_0027-8424_7_3603
 1998_95_0027-8424_7_3603
 1998_9_1059-1524_1_15
 1999_10_1059-1524_12_4091
 1999_10_1059-1524_8_2631
 1999_18_0261-4189_2_396
 1999_18_0261-4189_2_396
 1999_19_0270-7306_6_4231
 1999_19_0270-7306_7_5083
 1999_265_0014-2956_3_936
 1999_274_0021-9258_12_8291
 1999_274_0021-9258_36_25927
 1999_27_0305-1048_7_1600
 1999_27_0305-1048_7_1600
 1999_447_0014-5793_2-3_292
 1999_96_0027-8424_11_6193
 1999_96_0027-8424_11_6193
 1999_96_0027-8424_2_441
 1999_96_0027-8424_2_441
 2000_10_0960-9822_5_231
 2000_113_0021-9533_11_1929
 2000_11_1059-1524_12_4117
 2000_129_1047-8477_2-3_198
 2000_14_0890-9369_13_1631
 2000_14_0890-9369_18_2330
 2000_161_1073-449X_4_1355
 2000_20_0270-7306_22_8602
 2000_20_0270-7306_3_1021
 2000_275_0021-9258_41_32098
 2000_69_0066-4154__829
 2001_114_0021-9533_11_2027
 2001_11_0959-437X_1_64
 2001_11_0959-437X_1_64
 2001_152_0021-9525_6_1267
 2001_20_0261-4189_17_4836
 2001_20_0261-4189_17_4836
 2001_276_0021-9258_3_1993
 2001_276_0021-9258_48_44905
 2001_3_1465-7392_8_715
 2001_7_1078-0432_9_2712
 2002_109_0092-8674_7_849
 2002_12_0962-8924_2_72
 2002_13_1059-1524_4_1298
 2002_269_0014-2956_3_1040
 2002_274_0014-4827_2_334
 2002_277_0021-9258_18_16033
 2002_277_0021-9258_28_25431
 2002_277_0021-9258_4_2702
 2002_4_1465-7392_7_523
 2002_7_1356-9597_6_523
 2002_7_1356-9597_6_523
 2002_9_1097-2765_3_481
 2003_10_1352-0504_5_345
 2003_14_1059-1524_10_4250
 2003_160_0021-9525_2_177
 2003_278_0021-9258_33_30854
 2003_327_0022-2836_1_111
 2003_63_0008-5472_21_7356
 2003_77_0022-538X_4_2369
 2003_77_0022-538X_4_2369
 2004_165_0002-9440_4_1351
 2004_22_0734-9750_8_621
 2004_24_0270-7306_4_1614
 2004_279_0021-9258_10_9625
 2004_324_0006-291X_2_554
 2004_340_0022-2836_5_1197
 2004_574_0014-5793_1-3_192
 2005_204_0021-9541_2_381
 
	Citances for PMID: 8858148
 1996_274_0036-8075_5293_1659
 1996_87_0092-8674_1_53
 1997_11_0890-9369_21_2767
 1997_11_0890-9369_24_3365
 1997_11_0890-9369_24_3375
 1997_137_0021-9525_1_183
 1997_139_0021-9525_1_13
 1997_13_1046-2023_3_313
 1997_13_1081-0706__293
 1997_16_0261-4189_11_3312
 1997_16_0261-4189_11_3312
 1997_16_0261-4189_19_5966
 1997_16_0261-4189_19_5966
 1997_272_0021-9258_39_24508
 1997_275_0036-8075_5302_993
 1997_277_0036-8075_5332_1672
 1997_2_1356-9597_7_467
 1997_79_0300-9084_9-10_541
 1997_7_0959-437X_2_152
 1997_7_0959-437X_2_152
 1997_7_0962-8924_1_9
 1997_88_0092-8674_4_493
 1997_90_0092-8674_4_649
 1997_91_0092-8674_1_59
 1997_94_0027-8424_11_5611
 1997_94_0027-8424_11_5611
 1997_94_0027-8424_1_142
 1997_94_0027-8424_1_142
 1997_94_0027-8424_20_10729
 1997_94_0027-8424_20_10729
 1997_94_0027-8424_23_12521
 1997_94_0027-8424_23_12521
 1997_94_0027-8424_26_14320
 1997_94_0027-8424_26_14320
 1997_94_0027-8424_7_3151
 1997_94_0027-8424_7_3151
 1997_9_0955-0674_3_358
 1997_9_0955-0674_3_358
 1998_10_0955-0674_3_304
 1998_10_0955-0674_3_304
 1998_10_0955-0674_6_742
 1998_10_0955-0674_6_742
 1998_12_0890-9369_13_1986
 1998_12_0890-9369_14_2120
 1998_12_0890-9369_4_480
 1998_1398_0167-4781_2_113
 1998_140_0021-9525_2_271
 1998_140_0021-9525_3_451
 1998_17_0261-4189_10_2961
 1998_17_0261-4189_14_4139
 1998_17_0261-4189_14_4139
 1998_17_0261-4189_17_5182
 1998_17_0261-4189_17_5182
 1998_17_0261-4189_19_5689
 1998_17_0261-4189_19_5689
 1998_17_0261-4189_19_5699
 1998_17_0261-4189_19_5699
 1998_17_0261-4189_24_7219
 1998_17_0261-4189_24_7219
 1998_18_0270-7306_5_2758
 1998_1_1097-2765_4_519
 1998_238_0014-4827_1_63
 1998_244_0014-4827_2_372
 1998_245_0014-4827_2_282
 1998_273_0021-9258_14_8369
 1998_273_0021-9258_27_17095
 1998_273_0021-9258_29_18205
 1998_273_0021-9258_34_22083
 1998_273_0021-9258_38_24543
 1998_273_0021-9258_38_24891
 1998_273_0021-9258_3_1298
 1998_273_0021-9258_49_32421
 1998_2_1097-2765_1_23
 1998_3_1356-9597_11_737
 1998_67_0066-4154__721
 1998_8_0960-9822_6_347
 1998_92_0092-8674_3_295
 1998_93_0092-8674_6_1043
 1998_95_0027-8424_25_14693
 1998_95_0027-8424_25_14693
 1998_95_0027-8424_7_3603
 1998_95_0027-8424_7_3603
 1998_9_1059-1524_2_345
 1998_9_1059-1524_5_1163
 1998__0730-2312__8
 1999_10_1059-1524_12_4091
 1999_10_1059-1524_8_2631
 1999_112_0021-9533_12_2011
 1999_13_0890-9369_16_2159
 1999_13_0890-9369_20_2639
 1999_146_0021-9525_4_709
 1999_151_0016-6731_4_1445
 1999_18_0261-4189_20_5703
 1999_18_0261-4189_20_5703
 1999_18_0261-4189_2_396
 1999_18_0261-4189_2_396
 1999_18_1046-2023_3_407
 1999_19_0270-7306_10_7228
 1999_19_0270-7306_1_646
 1999_19_0270-7306_2_1226
 1999_264_0014-2956_2_415
 1999_265_0014-2956_3_936
 1999_274_0021-9258_12_8291
 1999_274_0021-9258_13_9092
 1999_274_0021-9258_33_23027
 1999_274_0021-9258_36_25927
 1999_447_0014-5793_2-3_292
 1999_68_0066-4154__649
 1999_71_0168-1656_1-3_239
 1999_71_0168-1656_1-3_239
 1999_71_0168-1656_1-3_239
 1999_96_0027-8424_11_6193
 1999_96_0027-8424_11_6193
 1999_96_0027-8424_2_441
 1999_96_0027-8424_2_441
 1999_96_0027-8424_6_2800
 1999_96_0027-8424_6_2800
 1999_9_0960-9822_4_211
 2000_10_0960-9822_24_1565
 2000_113_0021-9533_11_1929
 2000_11_1059-1524_12_4117
 2000_11_1059-1524_5_1673
 2000_129_1047-8477_2-3_186
 2000_129_1047-8477_2-3_198
 2000_129_1047-8477_2-3_211
 2000_14_0890-9369_12_1528
 2000_14_0890-9369_13_1631
 2000_14_0890-9369_14_1765
 2000_14_0890-9369_18_2330
 2000_14_0890-9369_19_2526
 2000_14_0890-9369_8_913
 2000_19_0261-4189_11_2728
 2000_19_0261-4189_11_2728
 2000_19_0261-4189_7_1681
 2000_19_0261-4189_7_1681
 2000_20_0270-7306_10_3667
 2000_20_0270-7306_22_8602
 2000_20_0270-7306_3_1021
 2000_20_0270-7306_9_3086
 2000_259_0014-4827_1_86
 2000_261_0014-4827_1_271
 2000_275_0021-9258_12_8426
 2000_275_0021-9258_20_15049
 2000_275_0021-9258_21_16235
 2000_275_0021-9258_25_18871
 2000_275_0021-9258_3_1615
 2000_275_0021-9258_45_34833
 2000_275_0021-9258_45_34983
 2000_275_0021-9258_4_2491
 2000_275_0021-9258_6_4239
 2000_275_0021-9258_8_5904
 2000_275_0021-9258_9_6337
 2000_28_0305-1048_23_4769
 2000_28_0305-1048_23_4769
 2000_28_0305-1048_2_472
 2000_28_0305-1048_2_472
 2000_28_0305-1048_2_570
 2000_28_0305-1048_2_570
 2000_290_0036-8075_5500_2271
 2000_296_0022-2836_3_769
 2000_5_1097-2765_4_617
 2000_69_0066-4154__829
 2000_6_1097-2765_3_637
 2000_6_1097-2765_4_839
 2000_97_0027-8424_4_1530
 2000_97_0027-8424_4_1530
 2000_97_0027-8424_6_2399
 2000_97_0027-8424_6_2399
 2001_110_0009-5915_3_159
 2001_114_0021-9533_11_2027
 2001_114_0021-9533_8_1447
 2001_13_1040-4651_12_2671
 2001_152_0021-9525_6_1267
 2001_187_0021-9541_1_1
 2001_20_0261-4189_13_3293
 2001_20_0261-4189_13_3293
 2001_20_0261-4189_15_4263
 2001_20_0261-4189_15_4263
 2001_20_0261-4189_17_4648
 2001_20_0261-4189_17_4648
 2001_21_0270-7306_17_5767
 2001_21_0270-7306_23_8095
 2001_276_0021-9258_48_44905
 2001_276_0021-9258_4_2708
 2001_276_0021-9258_51_48526
 2001_276_0021-9258_9_6337
 2001_3_1465-7392_2_107
 2001_3_1465-7392_8_715
 2001_4_1368-7646_6_347
 2001_52_0022-0957_355_183
 2001_8_1097-2765_5_1093
 2001_98_0027-8424_20_11211
 2001_98_0027-8424_20_11211
 2001_98_0027-8424_23_13114
 2001_98_0027-8424_23_13114
 2002_109_0092-8674_7_849
 2002_115_0021-9533_14_2829
 2002_115_0021-9533_1_51
 2002_13_1059-1524_11_3989
 2002_13_1059-1524_2_607
 2002_13_1059-1524_4_1298
 2002_140_1047-8477_1-3_17
 2002_16_0890-9369_10_1182
 2002_21_0261-4189_6_1437
 2002_21_0261-4189_6_1437
 2002_21_0950-9232_11_1777
 2002_22_0270-7306_1_105
 2002_22_0270-7306_4_1036
 2002_274_0014-4827_2_334
 2002_277_0021-9258_12_10354
 2002_277_0021-9258_18_16033
 2002_277_0021-9258_19_16920
 2002_277_0021-9258_28_25431
 2002_277_0021-9258_34_30824
 2002_277_0021-9258_36_33049
 2002_277_0021-9258_4_2702
 2002_30_0305-1048_2_569
 2002_30_0305-1048_2_569
 2002_3_1464-6722_6_473
 2002_419_0028-0836_6908_718
 2002_419_0028-0836_6908_722
 2002_71_0066-4154__333
 2002_7_1356-9597_6_523
 2002_7_1356-9597_6_523
 2002_99_0027-8424_3_1347
 2002_99_0027-8424_3_1347
 2003_113_0092-8674_1_115
 2003_116_0021-9533_19_3971
 2003_11_1097-2765_1_203
 2003_11_1097-2765_2_329
 2003_13_0962-8924_3_110
 2003_160_0021-9525_2_177
 2003_22_0261-4189_13_3441
 2003_22_0261-4189_13_3441
 2003_22_0261-4189_16_4294
 2003_22_0261-4189_16_4294
 2003_22_0261-4189_4_964
 2003_22_0261-4189_4_964
 2003_23_0270-7306_19_6769
 2003_260_0012-1606_2_362
 2003_278_0021-9258_33_30854
 2003_278_0021-9258_38_36051
 2003_278_0021-9258_49_48524
 2003_288_0014-4827_2_225
 2003_303_0006-291X_1_251
 2003_310_0378-1119__1
 2003_31_0305-1048_16_4888
 2003_31_0305-1048_16_4888
 2003_31_0305-1048_2_570
 2003_31_0305-1048_2_570
 2003_462_0014-2999_1-3_15
 2003_63_0008-5472_21_7356
 2004_117_0021-9533_21_4909
 2004_165_0002-9440_4_1351
 2004_165_0021-9525_2_181
 2004_16_1040-4651_9_2380
 2004_24_0270-7306_13_5875
 2004_24_0270-7306_4_1614
 2004_279_0021-9258_10_9625
 2004_279_0021-9258_27_28071
 2004_279_0021-9258_29_30807
 2004_279_0021-9258_51_53353
 2004_295_0014-4827_1_138
 2004_36_1061-4036_6_559
 2004_430_0028-0836_7002_913
 2004_6_1465-7392_10_991
 2005_118_0021-9533_11_2451
 2005_120_0092-8674_3_315
 2005_15_0960-9822_2_146
 2005_24_0261-4189_2_395
 2005_280_0021-9258_13_13071
 2005_33_0305-1048_2_765
 2005_579_0014-5793_4_877
 
	Citances for PMID: 8266072
 1994_1217_0167-4781_3_239
 1994_19_0968-0004_8_320
 1994_22_0305-1048_20_4111
 1994_22_0305-1048_21_4432
 1994_22_0305-1048_24_5385
 1994_4_0960-9822_3_238
 1994_6_0955-0674_3_368
 1994_6_0955-0674_3_368
 1994_6_0955-0674_3_373
 1994_6_0955-0674_3_373
 1994_76_0092-8674_6_963
 1994_78_0092-8674_2_303
 1994_79_0092-8674_4_557
 1994_91_0027-8424_18_8700
 1994_91_0027-8424_18_8700
 1994_91_0027-8424_26_12711
 1995_5_0960-9822_5_472
 1995_69_0022-538X_1_395
 1995_69_0022-538X_2_1296
 1995_7_0955-0674_3_371
 1995_7_0955-0674_3_371
 1995_7_0955-0674_3_414
 1995_7_0955-0674_3_414
 1995_81_0092-8674_5_667
 1995_81_0092-8674_7_1105
 1995_83_0092-8674_4_563
 1995_92_0027-8424_26_12475
 1995_92_0027-8424_26_12475
 1995_92_0027-8424_6_2224
 1995_92_0027-8424_6_2224
 1995_92_0027-8424_7_2514
 1995_92_0027-8424_7_2514
 1996_24_0305-1048_15_2885
 1996_24_0305-1048_15_2885
 1996_271_0021-9258_34_20868
 1996_271_0021-9258_39_24115
 1996_274_0036-8075_5293_1659
 1996_274_0076-6879__214
 1996_6_0959-437X_2_203
 1996_6_0959-437X_2_203
 1996_6_0960-9822_11_1416
 1996_6_0960-9822_4_467
 1996_84_0092-8674_4_633
 1996_87_0092-8674_2_287
 1996_93_0027-8424_4_1498
 1997_11_0890-9369_24_3375
 1997_137_0021-9525_1_183
 1997_13_0169-4758_12_468
 1997_13_1046-2023_3_221
 1997_13_1081-0706__293
 1997_145_0016-6731_4_923
 1997_145_0041-008X_2_268
 1997_146_0016-6731_4_1221
 1997_16_0261-4189_11_3243
 1997_16_0261-4189_11_3243
 1997_16_0261-4189_14_4340
 1997_16_0261-4189_14_4340
 1997_187_0378-1119_2_239
 1997_25_0305-1048_21_4250
 1997_25_0305-1048_21_4250
 1997_25_0305-1048_3_530
 1997_25_0305-1048_3_530
 1997_272_0021-9258_39_24508
 1997_272_0021-9258_45_28247
 1997_276_0036-8075_5318_1547
 1997_46_0888-7543_2_294
 1997_51_0066-4227__125
 1997_7_0959-437X_6_814
 1997_7_0959-437X_6_814
 1997_88_0092-8674_4_493
 1997_89_0092-8674_4_511
 1997_91_0092-8674_1_59
 1997_94_0027-8424_18_9768
 1997_94_0027-8424_18_9768
 1997_94_0027-8424_20_10786
 1997_94_0027-8424_20_10786
 1997_94_0027-8424_23_12491
 1997_94_0027-8424_23_12491
 1997_94_0027-8424_23_12521
 1997_94_0027-8424_23_12521
 1997_94_0027-8424_8_3888
 1997_94_0027-8424_8_3888
 1998_12_0890-9369_2_219
 1998_12_0890-9369_4_480
 1998_142_0021-9525_2_307
 1998_18_0270-7306_5_2758
 1998_18_0270-7306_9_5511
 1998_26_0305-1048_10_2392
 1998_26_0305-1048_10_2392
 1998_273_0021-9258_29_18205
 1998_273_0021-9258_42_27137
 1998_273_0021-9258_49_32421
 1998_279_0036-8075_5347_95
 1998_279_0036-8075_5357_1733
 1998_3_1356-9597_11_737
 1999_10_1059-1524_10_3263
 1999_151_0016-6731_1_31
 1999_18_0261-4189_13_3808
 1999_18_0261-4189_13_3808
 1999_18_1046-2023_3_418
 1999_19_0270-7306_10_6699
 1999_19_0270-7306_11_7428
 1999_19_0270-7306_2_1226
 1999_19_0270-7306_9_6098
 1999_265_0014-2956_3_936
 1999_274_0021-9258_33_23027
 1999_27_0305-1048_9_2022
 1999_27_0305-1048_9_2022
 1999_3_1097-2765_4_477
 1999_446_0014-5793_1_189
 1999_447_0014-5793_2-3_292
 1999_68_0066-4154__649
 1999_96_0027-8424_16_9130
 1999_96_0027-8424_16_9130
 1999_96_0027-8424_22_12367
 1999_96_0027-8424_22_12367
 1999_97_0092-8674_5_609
 1999_9_1088-9051_1_27
 2000_14_0890-9369_4_452
 2000_14_0890-9369_8_913
 2000_150_0021-9525_3_405
 2000_151_0021-9525_5_1047
 2000_158_0168-9452_1-2_33
 2000_19_0261-4189_17_4774
 2000_19_0261-4189_17_4774
 2000_275_0021-9258_45_34983
 2000_275_0021-9258_45_35233
 2000_275_0021-9258_6_4239
 2000_275_0021-9258_8_5904
 2000_28_0305-1048_20_3897
 2000_28_0305-1048_20_3897
 2000_477_0014-5793_1-2_43
 2000_5_1356-9597_12_975
 2000_5_1356-9597_6_481
 2000_64_1092-2172_2_435
 2000_69_0066-4154__829
 2001_114_0021-9533_11_2027
 2001_11_0960-9822_20_R816
 2001_12_1059-1524_6_1671
 2001_157_0016-6731_3_1179
 2001_159_0016-6731_1_35
 2001_21_0270-7306_15_4938
 2001_21_0270-7306_23_8082
 2001_276_0021-9258_28_26666
 2001_276_0021-9258_9_6337
 2001_294_0036-8075_5549_2181
 2001_2_1471-0056_8_640
 2001_98_0027-8424_24_13589
 2001_98_0027-8424_24_13589
 2002_109_0092-8674_7_835
 2002_109_0092-8674_7_849
 2002_111_0009-5915_5_291
 2002_111_0092-8674_3_419
 2002_12_0960-9822_11_869
 2002_13_1059-1524_1_25
 2002_160_0016-6731_4_1319
 2002_161_0016-6731_2_521
 2002_16_0890-9369_22_2935
 2002_16_0890-9369_6_659
 2002_1_1535-9778_2_200
 2002_21_0261-4189_17_4600
 2002_21_0261-4189_17_4600
 2002_22_0270-7306_12_4202
 2002_277_0021-9258_34_30824
 2002_76_0022-538X_7_3158
 2002_76_0022-538X_7_3158
 2003_17_0890-9369_9_1153
 2003_278_0021-9258_11_9185
 2003_278_0021-9258_42_41528
 2003_278_0021-9258_47_46440
 2003_31_0305-1048_2_619
 2003_31_0305-1048_2_619
 2004_167_0016-6731_2_579
 2004_16_1040-4651_4_1035
 2004_18_0890-9369_24_3094
 2004_18_0890-9369_7_769
 2004_18_0890-9369_9_981
 2004_23_0261-4189_13_2651
 2004_24_0270-7306_23_10300
 2004_279_0021-9258_14_13363
 2004_279_0021-9258_9_8469
 2004_340_0022-2836_1_29
 2004_428_0028-0836_6983_617
 2004_574_0014-5793_1-3_192
 2005_102_0027-8424_24_8519
 2005_280_0021-9258_13_12413
 2005_347_0022-2836_3_509
 2005_579_0014-5793_4_877
 
	Citances for PMID: 8939603
 1996_6_0960-9822_11_1416
 1997_13_1081-0706__293
 1997_16_0261-4189_11_3312
 1997_16_0261-4189_11_3312
 1997_79_0300-9084_9-10_541
 1997_7_0959-437X_2_152
 1997_7_0959-437X_2_152
 1997_7_0962-8924_1_9
 1997_90_0092-8674_4_649
 1997_91_0092-8674_1_59
 1997_91_0092-8674_3_311
 1997_94_0027-8424_11_5611
 1997_94_0027-8424_11_5611
 1997_94_0027-8424_7_3151
 1997_94_0027-8424_7_3151
 1997_94_0027-8424_8_3888
 1997_94_0027-8424_8_3888
 1998_10_0955-0674_3_304
 1998_10_0955-0674_3_304
 1998_10_0955-0674_6_742
 1998_10_0955-0674_6_742
 1998_12_0890-9369_13_1986
 1998_12_0890-9369_4_480
 1998_1398_0167-4781_2_113
 1998_140_0021-9525_3_451
 1998_149_0016-6731_3_1221
 1998_17_0261-4189_10_2961
 1998_17_0261-4189_17_5182
 1998_17_0261-4189_17_5182
 1998_17_0261-4189_19_5699
 1998_17_0261-4189_19_5699
 1998_17_0261-4189_24_7219
 1998_17_0261-4189_24_7219
 1998_1_1097-2765_4_519
 1998_238_0014-4827_1_63
 1998_244_0014-4827_2_372
 1998_273_0021-9258_13_7320
 1998_273_0021-9258_34_22083
 1998_273_0021-9258_38_24543
 1998_273_0021-9258_38_24891
 1998_273_0021-9258_42_27137
 1998_273_0021-9258_49_32421
 1998_279_0036-8075_5357_1733
 1998_92_0092-8674_3_295
 1998_95_0027-8424_25_14693
 1998_95_0027-8424_25_14693
 1998_9_1059-1524_5_1163
 1998__0730-2312__8
 1999_10_1059-1524_12_4091
 1999_112_0021-9533_12_2011
 1999_13_0890-9369_10_1289
 1999_13_0890-9369_20_2639
 1999_146_0021-9525_4_709
 1999_152_0016-6731_3_839
 1999_19_0270-7306_9_6154
 1999_23_0896-6273_1_45
 1999_264_0014-2956_2_415
 1999_274_0021-9258_33_23027
 1999_68_0066-4154__649
 1999_96_0027-8424_22_12367
 1999_96_0027-8424_22_12367
 1999_96_0027-8424_6_2800
 1999_96_0027-8424_6_2800
 1999_9_0960-9822_4_211
 2000_10_0960-9822_24_1547
 2000_113_0021-9533_11_1929
 2000_129_1047-8477_2-3_186
 2000_129_1047-8477_2-3_198
 2000_129_1047-8477_2-3_211
 2000_14_0890-9369_12_1528
 2000_14_0890-9369_19_2526
 2000_19_0261-4189_11_2728
 2000_19_0261-4189_11_2728
 2000_19_0261-4189_7_1681
 2000_19_0261-4189_7_1681
 2000_275_0021-9258_12_8426
 2000_275_0021-9258_20_15049
 2000_275_0021-9258_25_18871
 2000_275_0021-9258_3_1615
 2000_275_0021-9258_45_34833
 2000_275_0021-9258_45_34983
 2000_275_0021-9258_45_35233
 2000_275_0021-9258_4_2491
 2000_275_0021-9258_6_4239
 2000_275_0021-9258_8_5904
 2000_275_0021-9258_9_6337
 2000_28_0305-1048_23_4769
 2000_28_0305-1048_23_4769
 2000_28_0305-1048_2_472
 2000_28_0305-1048_2_472
 2000_296_0022-2836_3_769
 2000_69_0066-4154__829
 2000_95_0006-4971_7_2321
 2001_152_0021-9525_6_1267
 2001_20_0261-4189_13_3293
 2001_20_0261-4189_13_3293
 2001_20_0261-4189_15_4263
 2001_20_0261-4189_15_4263
 2001_20_0261-4189_17_4648
 2001_20_0261-4189_17_4648
 2001_21_0270-7306_23_8095
 2001_276_0021-9258_9_6337
 2001_3_1465-7392_2_107
 2001_3_1465-7392_8_715
 2002_111_0009-5915_5_291
 2002_115_0021-9533_1_51
 2002_13_1059-1524_2_607
 2002_140_1047-8477_1-3_17
 2002_16_0890-9369_6_659
 2002_21_0261-4189_6_1437
 2002_21_0261-4189_6_1437
 2002_22_0270-7306_1_105
 2002_22_0270-7306_4_1036
 2002_269_0014-2956_21_5192
 2002_274_0014-4827_2_334
 2002_277_0021-9258_4_2702
 2002_30_0305-1048_19_4176
 2002_30_0305-1048_19_4176
 2002_71_0066-4154__333
 2003_17_0890-9369_15_1894
 2003_22_0261-4189_13_3441
 2003_22_0261-4189_13_3441
 2003_22_0261-4189_16_4294
 2003_22_0261-4189_16_4294
 2003_23_0270-7306_14_5005
 2003_23_0270-7306_19_6769
 2003_278_0021-9258_42_41535
 2003_278_0021-9258_49_48524
 2003_288_0014-4827_2_225
 2003_310_0378-1119__1
 2003_31_0305-1048_2_570
 2003_31_0305-1048_2_570
 2003_31_0305-1048_8_2035
 2003_31_0305-1048_8_2035
 2003_4_1469-221X_1_26
 2003_4_1469-221X_1_26
 2004_116_0092-8674_1_25
 2004_23_0261-4189_13_2651
 2004_24_0270-7306_13_5875
 2004_279_0021-9258_27_28071
 2004_68_1092-2172_1_109
 2004_6_1465-7392_8_721
 2005_6_1471-0072_6_476
 
	Citances for PMID: 9889196
 1999_10_1059-1524_8_2631
 1999_147_0021-9525_2_295
 1999_18_0261-4189_20_5745
 1999_18_0261-4189_20_5745
 1999_18_0261-4189_2_396
 1999_18_0261-4189_2_396
 1999_1_1465-7392_3_E73
 1999_1_1465-7392_7_415
 1999_1_1465-7392_7_438
 1999_264_0014-2956_2_415
 1999_266_0006-291X_2_377
 1999_274_0021-9258_35_24445
 1999_274_0021-9258_36_25927
 1999_293_0022-2836_5_1067
 1999_447_0014-5793_2-3_292
 1999_73_0022-538X_11_9266
 1999_73_0022-538X_11_9266
 1999_85_0009-7330_4_319
 1999_85_0009-7330_4_319
 1999_96_0027-8424_11_6193
 1999_96_0027-8424_11_6193
 2000_10_0959-437X_2_178
 2000_10_0959-437X_2_178
 2000_10_0960-9822_4_195
 2000_113_0021-9533_11_1929
 2000_11_1059-1524_12_4117
 2000_129_1047-8477_2-3_186
 2000_14_0890-9369_12_1528
 2000_14_0890-9369_18_2265
 2000_14_0890-9369_18_2330
 2000_14_0890-9369_19_2526
 2000_19_0261-4189_11_2728
 2000_19_0261-4189_11_2728
 2000_20_0270-7306_14_5310
 2000_20_0270-7306_22_8602
 2000_20_0270-7306_3_1021
 2000_20_0270-7306_9_3086
 2000_223_0012-1606_1_139
 2000_245_0378-1119_1_13
 2000_259_0014-4827_1_86
 2000_275_0021-9258_13_9734
 2000_275_0021-9258_18_13699
 2000_275_0021-9258_21_16235
 2000_275_0021-9258_45_35233
 2000_275_0021-9258_8_5904
 2000_290_0036-8075_5500_2309
 2000_5_1356-9597_10_777
 2000_5_1356-9597_10_777
 2000_69_0066-4154__829
 2001_101_0009-2665_8_2511
 2001_114_0021-9533_11_2027
 2001_11_0959-437X_1_64
 2001_11_0959-437X_1_64
 2001_11_0960-9822_9_R367
 2001_11_1054-1500_1_269
 2001_13_1040-4651_12_2671
 2001_1471_0304-419X_3_M123
 2001_152_0021-9525_6_1267
 2001_153_0021-9525_1_137
 2001_187_0021-9541_1_1
 2001_20_0261-4189_15_4263
 2001_20_0261-4189_15_4263
 2001_20_0261-4189_17_4648
 2001_20_0261-4189_17_4648
 2001_20_0950-9232_11_1379
 2001_20_0950-9232_46_6777
 2001_21_0270-7306_11_3692
 2001_21_0270-7306_12_4032
 2001_21_0270-7306_15_4868
 2001_21_0270-7306_17_5767
 2001_21_0270-7306_2_624
 2001_21_0270-7306_8_2755
 2001_266_1617-4615_4_664
 2001_271_0014-4827_2_230
 2001_276_0021-9258_18_15415
 2001_276_0021-9258_29_26947
 2001_276_0021-9258_32_29987
 2001_276_0021-9258_36_33665
 2001_276_0021-9258_37_34428
 2001_276_0021-9258_3_1993
 2001_276_0021-9258_41_38076
 2001_276_0021-9258_48_44905
 2001_276_0021-9258_49_45780
 2001_306_0022-2836_2_201
 2001_3_1465-7392_2_107
 2001_411_0028-0836_6841_1068
 2002_115_0021-9533_14_2829
 2002_115_0021-9533_7_1435
 2002_12_0962-8924_2_72
 2002_13_1059-1524_11_3989
 2002_13_1059-1524_3_1030
 2002_13_1059-1524_4_1298
 2002_140_1047-8477_1-3_17
 2002_21_0261-4189_6_1437
 2002_21_0261-4189_6_1437
 2002_21_0950-9232_10_1493
 2002_21_0950-9232_11_1777
 2002_21_0950-9232_53_8089
 2002_22_0270-7306_6_1868
 2002_22_0270-7306_7_2242
 2002_269_0014-2956_3_1040
 2002_277_0021-9258_12_10354
 2002_277_0021-9258_28_25431
 2002_290_0006-291X_5_1368
 2002_41_0006-2960_52_15625
 2002_4_1465-7392_7_523
 2002_71_0066-4154__333
 2002_7_1356-9597_6_523
 2002_7_1356-9597_6_523
 2002_99_0027-8424_3_1347
 2002_99_0027-8424_3_1347
 2002_9_1097-2765_3_481
 2003_100_0027-8424_11_6628
 2003_100_0027-8424_11_6628
 2003_104_0020-7136_3_369
 2003_11_1097-2765_4_997
 2003_12_1097-2765_5_1067
 2003_13_0962-8924_8_396
 2003_14_1059-1524_10_4250
 2003_1642_0167-4889_3_163
 2003_22_0261-4189_23_6289
 2003_22_0261-4189_23_6289
 2003_22_0261-4189_3_704
 2003_22_0261-4189_3_704
 2003_260_0012-1606_2_362
 2003_278_0021-9258_11_9754
 2003_278_0021-9258_42_40815
 2003_278_0021-9258_48_48467
 2003_278_0021-9258_52_52052
 2003_305_0006-291X_2_412
 2003_306_0006-291X_4_851
 2003_310_0378-1119__1
 2003_31_0305-1048_17_5202
 2003_31_0305-1048_17_5202
 2003_35_1061-4036_1_25
 2003_37_0899-1987_2_65
 2003_42_1433-7851_19_2122
 2003_77_0022-538X_4_2369
 2003_77_0022-538X_4_2369
 2004_131_0950-1991_19_4807
 2004_14_0960-9822_18_R778
 2004_165_0002-9440_4_1351
 2004_165_0021-9525_2_181
 2004_165_0021-9525_4_473
 2004_22_0734-9750_8_621
 2004_23_0261-4189_15_3122
 2004_24_0270-7306_13_5875
 2004_24_0270-7306_24_10542
 2004_24_0270-7306_4_1614
 2004_279_0021-9258_10_9625
 2004_279_0021-9258_17_17283
 2004_279_0021-9258_19_19592
 2004_279_0021-9258_19_19691
 2004_315_0006-291X_4_1011
 2004_335_0022-2836_1_57
 2004_68_1092-2172_1_109
 2004_78_0022-538X_19_10410
 2004_78_0022-538X_19_10410
 2004_78_0022-538X_24_13954
 2004_78_0022-538X_24_13954
 2004_83_0888-7543_1_66
 2005_118_0021-9533_11_2451
 2005_16_1059-1524_3_1527
 2005_24_0950-9232_17_2827
 2005_24_0950-9232_17_2877
 2005_24_0950-9232_1_1
 2005_280_0021-9258_8_6253
 2005_434_0028-0836_7033_598
 2005_58_0021-9746_5_525
 2005_6_1471-0072_6_476
 2005_72_0006-3363_1_188
 2005_72_0006-3363_1_188
 
	Citances for PMID: 9177184
 1997_11_0890-9369_21_2767
 1997_94_0027-8424_12_6142
 1997_94_0027-8424_12_6142
 1997_94_0027-8424_20_10729
 1997_94_0027-8424_20_10729
 1998_10_0955-0674_3_304
 1998_10_0955-0674_3_304
 1998_10_0955-0674_6_742
 1998_10_0955-0674_6_742
 1998_12_0890-9369_3_382
 1998_12_0890-9369_7_901
 1998_17_0261-4189_19_5689
 1998_17_0261-4189_19_5689
 1998_244_0014-4827_2_372
 1998_273_0021-9258_34_22083
 1998_8_0959-437X_2_194
 1998_8_0959-437X_2_194
 1998_95_0027-8424_14_8159
 1998_95_0027-8424_14_8159
 1998_95_0027-8424_5_2384
 1998_95_0027-8424_5_2384
 1998_9_1059-1524_1_63
 1999_10_1059-1524_8_2631
 1999_152_0016-6731_3_839
 1999_96_0027-8424_11_6193
 1999_96_0027-8424_11_6193
 1999_96_0027-8424_2_441
 1999_96_0027-8424_2_441
 2000_10_0960-9822_5_231
 2000_11_1059-1524_12_4117
 2000_14_0890-9369_13_1631
 2000_14_0890-9369_19_2526
 2000_20_0270-7306_3_1021
 2000_69_0066-4154__829
 2001_11_0959-437X_1_64
 2001_11_0959-437X_1_64
 2001_265_1617-4615_6_1039
 2001_276_0021-9258_28_26189
 2001_98_0027-8424_20_11211
 2001_98_0027-8424_20_11211
 2002_160_0016-6731_4_1305
 2002_269_0014-2956_3_1040
 2003_22_0261-4189_3_704
 2003_22_0261-4189_3_704
 2004_165_0021-9525_2_181
 2004_68_1092-2172_1_109
 
	Citances for PMID: 9436991
 1998_10_0955-0674_6_742
 1998_10_0955-0674_6_742
 1998_17_0261-4189_14_4139
 1998_17_0261-4189_14_4139
 1998_17_0261-4189_19_5689
 1998_17_0261-4189_19_5689
 1998_23_0968-0004_10_399
 1998_244_0014-4827_2_372
 1998_280_0036-8075_5363_593
 1998_9_1059-1524_1_63
 1999_10_1059-1524_8_2631
 1999_151_0016-6731_4_1445
 1999_152_0016-6731_3_839
 1999_1_1465-7392_7_415
 1999_264_0014-2956_2_415
 1999_96_0027-8424_11_6193
 1999_96_0027-8424_11_6193
 2000_10_0960-9822_5_231
 2000_11_1059-1524_12_4117
 2000_11_1059-1524_5_1673
 2000_12_0955-0674_6_690
 2000_12_0955-0674_6_690
 2000_14_0890-9369_13_1631
 2000_154_0016-6731_2_599
 2000_19_0261-4189_7_1681
 2000_19_0261-4189_7_1681
 2000_20_0270-7306_3_1021
 2000_20_0270-7306_9_3086
 2000_275_0021-9258_13_9734
 2000_3_1369-5274_6_631
 2000_69_0066-4154__829
 2000_6_1097-2765_6_1377
 2001_11_0959-437X_1_64
 2001_11_0959-437X_1_64
 2001_12_1059-1524_5_1257
 2001_183_0021-9193_18_5459
 2001_183_0021-9193_18_5459
 2001_20_0261-4189_17_4836
 2001_20_0261-4189_17_4836
 2001_21_0270-7306_17_5767
 2001_3_1465-7392_12_1043
 2001_52_0022-0957_355_193
 2001_98_0027-8424_23_13114
 2001_98_0027-8424_23_13114
 2002_111_0092-8674_3_419
 2002_12_0960-9822_7_599
 2002_140_1047-8477_1-3_17
 2002_71_0066-4154__333
 2003_22_0261-4189_3_704
 2003_22_0261-4189_3_704
 2003_31_0305-1048_17_5202
 2003_31_0305-1048_17_5202
 2004_14_0960-9822_18_R778
 2004_15_1059-1524_8_3740
 2004_68_1092-2172_1_109
 2004_9_1356-9597_11_1069
 2004_9_1356-9597_11_1069
 2005_16_1059-1524_1_421
 2005_280_0021-9258_13_13071
 2005_280_0021-9258_8_6253
 2005_94_0730-2312_2_298
 
	Citances for PMID: 10339564
 1999_1_1465-7392_7_415
 1999_96_0027-8424_11_6193
 1999_96_0027-8424_11_6193
 2000_10_0959-437X_2_178
 2000_10_0959-437X_2_178
 2000_10_0960-9822_4_195
 2000_113_0021-9533_11_1929
 2000_11_1059-1524_12_4117
 2000_11_1059-1524_5_1673
 2000_129_1047-8477_2-3_186
 2000_129_1047-8477_2-3_198
 2000_12_0955-0674_6_690
 2000_12_0955-0674_6_690
 2000_14_0890-9369_18_2265
 2000_14_0890-9369_18_2330
 2000_14_0890-9369_19_2526
 2000_19_0261-4189_11_2728
 2000_19_0261-4189_11_2728
 2000_19_0950-9232_24_2828
 2000_20_0270-7306_22_8602
 2000_20_0270-7306_3_1021
 2000_20_0270-7306_9_3086
 2000_247_0378-1119_1-2_1
 2000_275_0021-9258_18_13699
 2000_275_0021-9258_45_35233
 2000_275_0021-9258_8_5904
 2000_28_0891-5849_9_1387
 2000_290_0036-8075_5500_2309
 2000_69_0066-4154__829
 2000_74_0022-538X_5_2107
 2000_74_0022-538X_5_2107
 2001_114_0021-9533_11_2027
 2001_11_0959-437X_1_64
 2001_11_0959-437X_1_64
 2001_13_1040-4651_12_2671
 2001_152_0021-9525_6_1267
 2001_153_0021-9525_1_137
 2001_187_0021-9541_1_1
 2001_20_0261-4189_15_4263
 2001_20_0261-4189_15_4263
 2001_20_0261-4189_17_4648
 2001_20_0261-4189_17_4648
 2001_21_0270-7306_12_4032
 2001_21_0270-7306_15_4868
 2001_21_0270-7306_2_624
 2001_22_0143-3334_2_233
 2001_271_0014-4827_2_230
 2001_276_0021-9258_29_26947
 2001_276_0021-9258_37_34428
 2001_276_0021-9258_3_1993
 2001_276_0021-9258_48_44905
 2001_3_1465-7392_2_107
 2001_411_0028-0836_6841_1068
 2001_4_1368-7646_6_347
 2002_115_0021-9533_14_2829
 2002_13_1059-1524_11_3989
 2002_13_1059-1524_4_1298
 2002_140_1047-8477_1-3_17
 2002_21_0261-4189_6_1437
 2002_21_0261-4189_6_1437
 2002_22_0270-7306_4_1036
 2002_22_0270-7306_6_1868
 2002_269_0014-2956_3_1040
 2002_277_0021-9258_28_25431
 2002_2_1535-6108_3_229
 2002_71_0066-4154__333
 2002_7_1356-9597_6_523
 2002_7_1356-9597_6_523
 2002_99_0027-8424_3_1347
 2002_99_0027-8424_3_1347
 2002_9_1097-2765_3_481
 2003_113_0092-8674_1_115
 2003_11_1097-2765_4_997
 2003_12_1097-2765_5_1067
 2003_14_1059-1524_10_4250
 2003_1642_0167-4889_3_163
 2003_22_0261-4189_3_704
 2003_22_0261-4189_3_704
 2003_260_0012-1606_2_362
 2003_278_0021-9258_33_30854
 2003_278_0021-9258_42_41535
 2003_278_0021-9258_48_48467
 2003_305_0006-291X_2_412
 2003_306_0006-291X_4_851
 2003_310_0378-1119__1
 2003_31_0305-1048_17_5202
 2003_31_0305-1048_17_5202
 2003_77_0022-538X_4_2369
 2003_77_0022-538X_4_2369
 2004_14_0960-9822_18_R778
 2004_22_0734-9750_8_621
 2004_24_0270-7306_13_5875
 2004_24_0270-7306_4_1614
 2004_279_0021-9258_10_9625
 2004_279_0021-9258_17_17283
 2004_279_0021-9258_19_19691
 2004_279_0021-9258_29_30807
 2004_6_1465-542X_2_R130
 2004_78_0022-538X_24_13954
 2004_78_0022-538X_24_13954
 2005_16_1059-1524_3_1527
 2005_24_0950-9232_1_1
 2005_280_0021-9258_8_6253
 2005_72_0006-3363_1_188
 2005_72_0006-3363_1_188
 2005_83_0021-8812_1_89
 
	Citances for PMID: 9653157
 1998_10_0955-0674_6_742
 1998_10_0955-0674_6_742
 1998_10_0955-0674_6_759
 1998_10_0955-0674_6_759
 1998_3_1356-9597_11_721
 1998_95_0027-8424_14_8159
 1998_95_0027-8424_14_8159
 1999_10_1059-1524_10_3263
 1999_10_1059-1524_8_2631
 1999_13_0890-9369_17_2242
 1999_15_1081-0706__435
 1999_1_1465-7392_4_193
 1999_274_0021-9258_13_9092
 1999_72_0079-6107_3_299
 1999_9_0960-9822_7_373
 2000_10_0959-437X_1_54
 2000_10_0959-437X_1_54
 2000_11_1059-1524_2_543
 2000_19_0261-4189_13_3475
 2000_19_0261-4189_13_3475
 2000_20_0270-7306_3_1021
 2000_275_0021-9258_41_32317
 2000_69_0066-4154__829
 2000_6_1097-2765_6_1377
 2001_11_0960-9822_9_R367
 2001_13_0955-0674_2_131
 2001_13_0955-0674_2_131
 2001_20_0261-4189_17_4836
 2001_20_0261-4189_17_4836
 2001_21_0270-7306_17_5767
 2001_3_1465-7392_12_1043
 2001_98_0027-8424_23_13114
 2001_98_0027-8424_23_13114
 2002_269_0014-2956_14_3511
 2002_71_0066-4154__333
 2003_12_1097-2765_5_1067
 2003_260_0012-1606_2_362
 2003_278_0021-9258_11_9671
 2004_14_0960-9822_18_R778
 2004_1695_0167-4889_1-3_133
 2004_279_0021-9258_18_18974
 2004_325_0006-291X_4_1424
 2004_68_1092-2172_1_109
 
	Citances for PMID: 10859170
 2000_12_0955-0674_6_690
 2000_12_0955-0674_6_690
 2000_14_0890-9369_12_1528
 2000_1_1469-221X_4_319
 2000_1_1469-221X_4_319
 2000_275_0021-9258_50_39773
 2000_28_0305-1048_23_4769
 2000_28_0305-1048_23_4769
 2000_6_1097-2765_3_649
 2001_101_0009-2665_8_2511
 2001_114_0021-9533_8_1447
 2001_152_0021-9525_6_1267
 2001_20_0261-4189_13_3293
 2001_20_0261-4189_13_3293
 2001_276_0021-9258_20_17092
 2001_276_0021-9258_46_42744
 2001_276_0021-9258_51_48526
 2001_3_1465-7392_8_715
 2001_3_1465-7392_8_E182
 2001_490_0014-5793_3_117
 2001_98_0027-8424_20_11211
 2001_98_0027-8424_20_11211
 2001_98_0027-8424_9_4978
 2001_98_0027-8424_9_4978
 2002_13_1059-1524_4_1298
 2002_13_1059-1524_5_1462
 2002_140_1047-8477_1-3_17
 2002_159_0021-9525_4_541
 2002_161_0016-6731_1_47
 2002_190_0021-9541_3_287
 2002_21_0261-4189_12_3171
 2002_21_0261-4189_12_3171
 2002_21_0261-4189_6_1437
 2002_21_0261-4189_6_1437
 2002_21_0261-4189_9_2168
 2002_21_0261-4189_9_2168
 2002_21_0950-9232_51_7786
 2002_243_0012-1606_1_34
 2002_273_0014-4827_1_54
 2002_277_0021-9258_36_33049
 2002_277_0021-9258_43_40520
 2002_277_0021-9258_44_41706
 2002_71_0066-4154__333
 2002_7_1356-9597_6_523
 2002_7_1356-9597_6_523
 2002_99_0027-8424_25_16087
 2002_99_0027-8424_25_16087
 2002_9_1097-2765_2_233
 2003_116_0021-9533_19_3971
 2003_11_1097-2765_1_203
 2003_11_1097-2765_2_329
 2003_12_1097-2765_5_1067
 2003_14_1059-1524_9_3876
 2003_22_0261-4189_10_2526
 2003_22_0261-4189_10_2526
 2003_22_0261-4189_3_704
 2003_22_0261-4189_3_704
 2003_278_0021-9258_42_41083
 2003_288_0014-4827_2_225
 2003_310_0378-1119__1
 2003_327_0022-2836_1_111
 2003_532_0027-5107_1-2_29
 2003_8_1356-9597_2_145
 2004_113_0009-5915_3_145
 2004_117_0021-9533_21_4897
 2004_117_0021-9533_25_6019
 2004_165_0021-9525_2_181
 2004_16_1097-2765_2_173
 2004_23_0261-4189_18_3667
 2004_279_0021-9258_29_30807
 2004_295_0014-4827_1_138
 2004_68_1092-2172_1_109
 2005_10_1356-9597_6_551
 2005_15_0960-9822_2_146
 2005_24_0950-9232_17_2827
 
	Citances for PMID: 8598285
 1996_271_0021-9258_51_32503
 1996_274_0036-8075_5293_1659
 1996_87_0092-8674_1_53
 1996_8_0955-0674_6_815
 1996_8_0955-0674_6_815
 1996_93_0027-8424_19_9997
 1997_11_0890-9369_21_2767
 1997_13_1081-0706__293
Error parsing file 1997_13_1081-0706__293_111058275372002. Error code .
 1997_16_0261-4189_19_5966
 1997_16_0261-4189_19_5966
 1997_16_0261-4189_2_318
 1997_16_0261-4189_2_318
 1997_3_1360-9947_10_863
 1997_51_0066-4227__125
 1997_7_0959-437X_2_152
 1997_7_0959-437X_2_152
 1997_7_0962-8924_1_9
 1997_94_0027-8424_12_6142
 1997_94_0027-8424_12_6142
 1997_94_0027-8424_1_142
 1997_94_0027-8424_1_142
 1997_94_0027-8424_26_14320
 1997_94_0027-8424_26_14320
 1997_9_0955-0674_3_358
 1997_9_0955-0674_3_358
 1998_140_0021-9525_2_271
 1998_149_0016-6731_3_1221
 1998_17_0261-4189_18_5388
 1998_17_0261-4189_18_5388
 1998_17_0261-4189_19_5689
 1998_17_0261-4189_19_5689
 1998_17_0261-4189_24_7219
 1998_17_0261-4189_24_7219
 1998_17_0261-4189_2_482
 1998_280_0036-8075_5363_593
 1998_2_1097-2765_5_571
 1998_95_0027-8424_14_8159
 1998_95_0027-8424_14_8159
 1998_95_0027-8424_7_3603
 1998_95_0027-8424_7_3603
 1998_9_1059-1524_1_63
 1998_9_1059-1524_6_1309
 1999_10_1059-1524_10_3263
 1999_152_0016-6731_3_839
 1999_15_0168-9525_9_340
 1999_447_0014-5793_2-3_292
 2000_10_0960-9822_5_231
 2000_14_0890-9369_13_1631
 2000_19_0261-4189_15_3945
 2000_19_0261-4189_15_3945
 2000_19_0261-4189_15_3968
 2000_19_0261-4189_15_3968
 2000_20_0270-7306_22_8602
 2000_28_0305-1048_2_570
 2000_28_0305-1048_2_570
 2000_69_0066-4154__829
 2001_13_1040-4651_12_2671
 2001_276_0021-9258_37_34428
 2001_98_0027-8424_20_11211
 2001_98_0027-8424_20_11211
 2001_98_0027-8424_23_13114
 2001_98_0027-8424_23_13114
 2002_109_0092-8674_7_849
 2002_12_0960-9822_7_599
 2002_13_1059-1524_2_435
 2002_99_0027-8424_3_1347
 2002_99_0027-8424_3_1347
 2003_11_1097-2765_4_997
 2005_569_0027-5107_1-2_111
 
	Citances for PMID: 11125146
 2000_290_0036-8075_5500_2271
 2000_290_0036-8075_5500_2309
 2001_105_0092-8674_3_297
 2001_106_0092-8674_3_287
 2001_114_0021-9533_8_1447
 2001_11_0960-9822_9_R367
 2001_15_0890-9369_20_2741
 2001_20_0261-4189_13_3293
 2001_20_0261-4189_13_3293
 2001_20_0261-4189_15_4263
 2001_20_0261-4189_15_4263
 2001_20_0261-4189_17_4648
 2001_20_0261-4189_17_4648
 2001_21_0270-7306_17_5767
 2001_276_0021-9258_37_34428
 2001_276_0021-9258_41_38076
 2001_276_0021-9258_48_44905
 2001_276_0021-9258_51_48526
 2001_294_0036-8075_5540_96
 2001_35_0066-4197__673
 2001_3_1465-7392_2_E49
 2001_3_1465-7392_8_715
 2001_98_0027-8424_18_10085
 2001_98_0027-8424_18_10085
 2001_98_0027-8424_20_11152
 2001_98_0027-8424_20_11152
 2001_98_0027-8424_23_13114
 2001_98_0027-8424_23_13114
 2002_109_0092-8674_7_849
 2002_111_0092-8674_3_419
 2002_115_0021-9533_14_2829
 2002_115_0021-9533_15_3159
 2002_115_0021-9533_1_51
 2002_115_0021-9533_7_1435
 2002_12_0960-9822_8_678
 2002_12_0960-9822_8_689
 2002_12_0962-8924_2_72
 2002_13_1059-1524_10_3662
 2002_13_1059-1524_11_3989
 2002_13_1059-1524_2_435
 2002_13_1059-1524_2_607
 2002_140_1047-8477_1-3_17
 2002_158_0021-9525_5_863
 2002_1599_1570-9639_1-2_149
 2002_159_0021-9525_4_541
 2002_161_0002-9440_1_267
 2002_16_0890-9369_17_2179
 2002_21_0261-4189_6_1437
 2002_21_0261-4189_6_1437
 2002_21_0950-9232_43_6624
 2002_21_0950-9232_8_1150
 2002_22_0270-7306_6_1868
 2002_243_0012-1606_1_34
 2002_269_0014-2956_3_1040
 2002_274_0014-4827_2_334
 2002_277_0021-9258_34_30824
 2002_277_0021-9258_36_33049
 2002_277_0021-9258_43_40520
 2002_277_0021-9258_43_40871
 2002_277_0021-9258_45_43121
 2002_30_0305-1048_11_2261
 2002_30_0305-1048_11_2261
 2002_30_0305-1048_19_4176
 2002_30_0305-1048_19_4176
 2002_4_1465-7392_3_198
 2002_4_1465-7392_3_E58
 2002_71_0066-4154__333
 2002_7_1356-9597_6_523
 2002_7_1356-9597_6_523
 2002_9_1097-2765_2_233
 2002_9_1097-2765_3_481
 2002__0020-7136__131
 2003_100_0027-8424_23_13241
 2003_100_0027-8424_23_13241
 2003_113_0092-8674_1_115
 2003_116_0021-9533_19_3971
 2003_11_1097-2765_1_203
 2003_11_1097-2765_4_997
 2003_12_1097-2765_3_735
 2003_12_1097-2765_5_1067
 2003_13_0962-8924_3_110
 2003_14_1059-1524_6_2206
 2003_14_1059-1524_9_3876
 2003_17_0890-9369_8_965
 2003_17_0890-9369_9_1141
 2003_22_0261-4189_10_2526
 2003_22_0261-4189_10_2526
 2003_278_0021-9258_45_44312
 2003_288_0014-4827_2_225
 2003_305_0006-291X_2_412
 2003_310_0378-1119__1
 2003_327_0022-2836_1_111
 2003_423_0028-0836_6942_818
 2003_423_0028-0836_6942_885
 2003_4_1469-221X_1_42
 2003_4_1469-221X_1_42
 2003_5_1465-7392_11_1008
 2003_65_0006-2952_8_1281
 2003_77_0022-538X_4_2369
 2003_77_0022-538X_4_2369
 2003_8_1360-1385_2_83
 2003_9_1007-9327_4_818
 2004_117_0021-9533_21_4909
 2004_117_0021-9533_24_5875
 2004_119_0092-8674_5_707
 2004_11_1545-9985_10_1021
 2004_131_0950-1991_19_4807
 2004_14_0960-9822_18_R778
 2004_15_1097-2765_2_245
 2004_165_0002-9440_4_1351
 2004_165_0021-9525_2_181
 2004_165_0021-9525_4_473
 2004_1695_0167-4889_1-3_133
 2004_204_0022-3417_2_121
 2004_23_0261-4189_15_3122
 2004_23_0261-4189_18_3667
 2004_23_0950-9232_1_58
 2004_23_0950-9232_21_3802
 2004_24_0270-7306_16_7140
 2004_24_0270-7306_4_1614
 2004_279_0021-9258_10_9625
 2004_279_0021-9258_17_17283
 2004_279_0021-9258_19_19691
 2004_279_0021-9258_26_27315
 2004_279_0021-9258_28_29255
 2004_279_0021-9258_29_30807
 2004_279_0021-9258_31_32569
 2004_279_0021-9258_40_41686
 2004_279_0021-9258_44_45957
 2004_295_0014-4827_1_138
 2004_315_0006-291X_4_1011
 2004_317_0006-291X_1_218
 2004_326_0042-6822_2_317
 2004_342_0022-2836_1_275
 2004_427_0028-0836_6976_745
 2004_427_0028-0836_6976_749
 2004_430_0028-0836_7002_913
 2004_574_0014-5793_1-3_192
 2004_68_1092-2172_1_109
 2004_6_1465-7392_10_954
 2004_6_1465-7392_10_991
 2004_6_1465-7392_3_260
 2004_78_0022-538X_14_7784
 2004_78_0022-538X_14_7784
 2005_10_1356-9597_1_63
 2005_120_0092-8674_3_315
 2005_121_0092-8674_6_887
 2005_15_0960-9822_2_146
 2005_16_1084-9521_3_311
 2005_16_1084-9521_3_449
 2005_19_0890-9369_14_1723
 2005_19_0890-9369_1_114
 2005_202_0021-9541_1_215
 2005_205_0022-3417_3_318
 2005_24_0261-4189_2_395
 2005_24_0950-9232_17_2827
 2005_280_0021-9258_20_19689
 2005_280_0021-9258_24_23416
 2005_280_0021-9258_7_5178
 2005_280_0021-9258_8_6253
 2005_33_0305-1048_1_316
 2005_33_0305-1048_2_765
 2005_569_0027-5107_1-2_111
 2005_579_0014-5793_4_877
 2005_5_1474-175X_2_135
 2005_6_1471-0072_6_476
 
	Citances for PMID: 9635433
 1998_10_0955-0674_6_742
 1998_10_0955-0674_6_742
 1998_10_0955-0674_6_759
 1998_10_0955-0674_6_759
 1998_273_0021-9258_51_34302
 1998_282_0036-8075_5393_1497
 1998_2_1097-2765_6_709
 1998_8_0960-9822_18_R636
 1998_93_0092-8674_6_1043
 1999_10_1059-1524_11_3927
 1999_13_0890-9369_16_2039
 1999_19_0270-7306_7_5083
 1999_248_0014-4827_2_339
 1999_274_0021-9258_20_14500
 1999_274_0021-9258_53_37893
 1999_285_0036-8075_5426_418
 1999_4_1356-9597_8_445
 1999_68_0066-4154__583
 1999_9_0960-9822_4_174
 2000_10_0959-437X_1_54
 2000_10_0959-437X_1_54
 2000_11_1059-1524_12_4117
 2000_11_1059-1524_8_2821
 2000_14_0890-9369_12_1528
 2000_14_0890-9369_18_2330
 2000_14_0890-9369_6_655
 2000_19_0950-9232_23_2731
 2000_20_0270-7306_13_4614
 2000_20_0270-7306_20_7613
 2000_20_0270-7306_22_8602
 2000_20_0270-7306_23_8923
 2000_228_0012-1606_2_197
 2000_268_0006-291X_2_562
 2000_275_0021-9258_37_29042
 2000_275_0021-9258_49_38384
 2000_275_0021-9258_50_39773
 2000_289_0036-8075_5487_2133
 2000_28_0305-1048_2_472
 2000_28_0305-1048_2_472
 2000_290_0036-8075_5500_2271
 2000_290_0036-8075_5500_2309
 2000_5_1097-2765_1_85
 2000_5_1356-9597_6_439
 2001_106_0092-8674_3_287
 2001_107_0092-8674_6_689
 2001_114_0021-9533_8_1447
 2001_11_0959-4388_1_66
 2001_11_0960-9822_9_R367
 2001_15_0890-9369_18_2396
 2001_15_0890-9369_20_2741
 2001_187_0021-9541_1_1
 2001_20_0261-4189_13_3293
 2001_20_0261-4189_13_3293
 2001_20_0261-4189_15_4263
 2001_20_0261-4189_15_4263
 2001_20_0261-4189_17_4648
 2001_20_0261-4189_17_4648
 2001_20_0261-4189_18_5165
 2001_20_0261-4189_18_5165
 2001_21_0270-7306_11_3692
 2001_21_0270-7306_17_5767
 2001_222_1058-8388_3_315
 2001_276_0021-9258_25_22468
 2001_276_0021-9258_37_34428
 2001_276_0021-9258_48_44905
 2001_276_0021-9258_51_48526
 2001_35_0066-4197__673
 2001_3_1465-7392_2_107
 2001_3_1465-7392_2_E49
 2001_3_1465-7392_8_715
 2001_8_1097-2765_5_1027
 2001_98_0027-8424_23_13114
 2001_98_0027-8424_23_13114
 2002_111_0092-8674_3_419
 2002_115_0021-9533_14_2829
 2002_115_0021-9533_15_3159
 2002_115_0021-9533_1_51
 2002_115_0021-9533_7_1435
 2002_12_0960-9822_8_678
 2002_12_0962-8924_2_72
 2002_130_0032-0889_3_1230
 2002_130_0032-0889_3_1230
 2002_13_1059-1524_10_3662
 2002_13_1059-1524_11_3989
 2002_13_1059-1524_2_607
 2002_140_1047-8477_1-3_17
 2002_158_0021-9525_5_863
 2002_1599_1570-9639_1-2_149
 2002_161_0002-9440_1_267
 2002_16_0890-9369_17_2179
 2002_16_0890-9369_18_2327
 2002_21_0261-4189_17_4500
 2002_21_0261-4189_17_4500
 2002_21_0261-4189_6_1437
 2002_21_0261-4189_6_1437
 2002_21_0950-9232_22_3525
 2002_21_0950-9232_43_6624
 2002_22_0270-7306_6_1868
 2002_243_0012-1606_1_34
 2002_273_0014-4827_1_54
 2002_277_0021-9258_36_33049
 2002_277_0021-9258_43_40871
 2002_3_1529-2908_1_33
 2002_3_1534-5807_4_557
 2002_4_1465-7392_3_198
 2002_4_1465-7392_3_E58
 2002_71_0066-4154__333
 2002_7_1356-9597_6_523
 2002_7_1356-9597_6_523
 2002_82_0031-9333_2_373
 2002_9_1097-2765_3_481
 2003_100_0027-8424_23_13241
 2003_100_0027-8424_23_13241
 2003_113_0092-8674_1_101
 2003_113_0092-8674_1_115
 2003_114_0092-8674_4_398
 2003_11_1097-2765_2_329
 2003_11_1097-2765_4_997
 2003_12_1097-2765_5_1067
 2003_14_1059-1524_9_3876
 2003_15_1040-4651_10_2370
 2003_160_0021-9525_5_645
 2003_22_0261-4189_14_3715
 2003_22_0261-4189_14_3715
 2003_278_0021-9258_11_9448
 2003_278_0021-9258_42_41083
 2003_288_0014-4827_2_225
 2003_305_0006-291X_2_412
 2003_327_0022-2836_1_111
 2003_40_0896-6273_2_199
 2003_4_1469-221X_1_42
 2003_4_1469-221X_1_42
 2003_4_1471-0072_11_855
 2003_77_0022-538X_4_2369
 2003_77_0022-538X_4_2369
 2003_8_1360-1385_2_83
 2004_117_0021-9533_24_5875
 2004_117_0021-9533_25_5975
 2004_119_0092-8674_5_707
 2004_11_1545-9985_10_1021
 2004_131_0950-1991_19_4807
 2004_13_1097-2765_1_137
 2004_14_0960-9822_17_1598
 2004_14_0960-9822_18_R778
 2004_15_1097-2765_2_245
 2004_165_0002-9440_4_1351
 2004_165_0021-9525_2_181
 2004_165_0021-9525_4_473
 2004_165_0021-9525_6_801
 2004_1695_0167-4889_1-3_133
 2004_16_1040-4651_2_422
 2004_195_0041-008X_2_232
 2004_204_0022-3417_2_121
 2004_23_0261-4189_15_3122
 2004_23_0950-9232_1_58
 2004_23_0950-9232_21_3802
 2004_24_0270-7306_16_7140
 2004_279_0021-9258_10_9625
 2004_279_0021-9258_19_19691
 2004_279_0021-9258_26_27315
 2004_279_0021-9258_28_29255
 2004_279_0021-9258_29_30807
 2004_279_0021-9258_40_41686
 2004_279_0021-9258_44_45957
 2004_279_0021-9258_51_53353
 2004_295_0014-4827_1_138
 2004_315_0006-291X_4_1011
 2004_317_0006-291X_1_218
 2004_32_1046-2023_2_191
 2004_342_0022-2836_1_275
 2004_427_0028-0836_6976_745
 2004_427_0028-0836_6976_749
 2004_428_0028-0836_6979_194
 2004_430_0028-0836_7002_913
 2004_6_1465-7392_3_260
 2004_78_0022-538X_14_7784
 2004_78_0022-538X_14_7784
 2005_10_1356-9597_1_63
 2005_120_0092-8674_3_315
 2005_122_0925-4773_3_441
 2005_132_0950-1991_10_2401
 2005_15_0960-9822_2_146
 2005_15_1088-9051_1_44
 2005_16_1059-1524_1_421
 2005_16_1084-9521_3_311
 2005_16_1084-9521_3_335
 2005_16_1084-9521_3_449
 2005_18_1097-2765_2_185
 2005_19_0890-9369_14_1723
 2005_19_0890-9369_1_114
 2005_19_0890-9369_9_1040
 2005_202_0021-9541_1_215
 2005_205_0022-3417_3_318
 2005_24_0261-4189_2_395
 2005_24_0950-9232_17_2827
 2005_24_0950-9232_3_314
 2005_280_0021-9258_20_19689
 2005_280_0021-9258_8_6253
 2005_33_0305-1048_1_316
 2005_33_0305-1048_2_765
 2005_569_0027-5107_1-2_111
 2005_6_1471-0072_6_476
 2005_8_1534-5807_1_53
 2005_8_1534-5807_3_435
 
	Citances for PMID: 6323245
 1984_106_0016-6731_3_365
 1988_53_0092-8674_6_927
 1988_85_0027-8424_3_743
 1990_124_0016-6731_2_237
 1990_185_0076-6879__234
 1990_87_0027-8424_12_4665
 1990_96_0378-1119_2_197
 1991_1088_0006-3002_2_155
 1991_19_0305-1048_22_6255
 1991_19_0305-1048_7_1385
 1991_66_0092-8674_3_483
 1992_20_0305-1048_10_2403
 1992_20_0305-1048_21_5571
 1992_89_0027-8424_21_10459
 1993_123_0021-9525_6_1635
 1993_21_0305-1048_23_5289
 1993_73_0092-8674_4_761
 1994_1217_0167-4781_3_239
 1994_19_0968-0004_8_320
 1995_23_0305-1048_12_2097
 1995_5_0960-9822_11_1270
 1996_21_0968-0004_3_102
 1996_271_0021-9258_8_4349
 1996_274_0036-8075_5293_1659
 1996_6_0960-9822_11_1416
 1996_6_0962-8924_5_184
 1996_87_0092-8674_2_287
 1996_93_0027-8424_19_10189
 1996_93_0027-8424_19_10189
 1996_93_0027-8424_19_9997
 1997_11_0890-9369_24_3365
 1997_136_0021-9525_1_125
 1997_13_1081-0706__293
 1997_16_0261-4189_11_3312
 1997_16_0261-4189_11_3312
 1997_187_0378-1119_2_239
 1997_272_0021-9258_16_10928
 1997_2_1356-9597_7_467
 1997_7_0959-437X_2_152
 1997_7_0959-437X_2_152
 1997_91_0092-8674_1_59
 1997_94_0027-8424_11_5611
 1997_94_0027-8424_11_5611
 1997_94_0027-8424_7_3151
 1997_94_0027-8424_7_3151
 1998_1398_0167-4781_2_113
 1998_18_0270-7306_5_2748
 1998_26_0305-1048_17_3955
 1998_26_0305-1048_17_3955
 1998_273_0021-9258_27_17095
 1998_273_0021-9258_51_34302
 1998_279_0036-8075_5357_1733
 1998_62_1092-2172_4_1191
 1998_8_0960-9822_6_347
 1999_13_0890-9369_9_1140
 1999_151_0016-6731_4_1445
 1999_153_0016-6731_3_1171
 1999_18_1046-2023_3_329
 1999_19_0270-7306_5_3312
 1999_19_0270-7306_9_6154
 1999_274_0021-9258_50_35975
 1999_27_0305-1048_15_3001
 1999_27_0305-1048_15_3001
 1999_31_0950-382X_1_349
 1999_68_0066-4154__649
 1999_96_0027-8424_26_14783
 1999_96_0027-8424_26_14783
 2000_14_0890-9369_8_913
 2000_20_0270-7306_18_7037
 2000_275_0021-9258_20_15049
 2000_275_0021-9258_25_18871
 2000_275_0021-9258_45_34833
 2000_275_0021-9258_4_2491
 2000_69_0066-4154__829
 2000_97_0027-8424_4_1530
 2000_97_0027-8424_4_1530
 2001_114_0021-9533_8_1447
 2001_159_0016-6731_2_471
 2001_265_1617-4615_2_249
 2001_276_0021-9258_18_15397
 2001_276_0021-9258_52_49371
 2002_12_0960-9822_8_689
 2002_13_1059-1524_2_607
 2002_160_0016-6731_4_1305
 2002_162_0016-6731_3_1117
 2002_16_0890-9369_1_101
 2002_190_0021-9541_3_287
 2002_21_0950-9232_43_6624
 2002_21_0950-9232_8_1150
 2002_269_0014-2956_6_1697
 2002_277_0021-9258_14_12118
 2002_277_0021-9258_34_30824
 2002_277_0021-9258_43_40520
 2002_277_0021-9258_4_2702
 2002_71_0066-4154__333
 2002_7_1356-9597_6_523
 2002_7_1356-9597_6_523
 2003_13_0960-9822_1_R31
 2003_14_1059-1524_2_460
 2003_14_1059-1524_9_3876
 2003_160_0021-9525_6_833
 2003_270_0014-2956_19_3880
 2003_278_0021-9258_28_25408
 2003_278_0021-9258_29_26750
 2003_278_0021-9258_30_27372
 2003_278_0021-9258_38_36051
 2003_278_0021-9258_8_6093
 2003_31_0305-1048_11_2915
 2003_31_0305-1048_11_2915
 2004_24_0270-7306_14_6514
 2004_279_0021-9258_44_45586
 2004_68_1092-2172_1_109
 2005_33_0305-1048_8_2410
 
	Citances for PMID: 9335335
 1997_11_0890-9369_24_3365
 1997_91_0092-8674_1_59
 1997_91_0092-8674_6_717
 1998_10_0955-0674_3_304
 1998_10_0955-0674_3_304
 1998_10_0955-0674_6_742
 1998_10_0955-0674_6_742
 1998_12_0890-9369_4_480
 1998_1443_0167-4781_1-2_23
 1998_17_0261-4189_10_2961
 1998_17_0261-4189_14_4139
 1998_17_0261-4189_14_4139
 1998_17_0261-4189_17_5182
 1998_17_0261-4189_17_5182
 1998_17_0261-4189_19_5689
 1998_17_0261-4189_19_5689
 1998_17_0261-4189_19_5699
 1998_17_0261-4189_19_5699
 1998_17_0261-4189_23_6963
 1998_17_0261-4189_23_6963
 1998_17_0261-4189_24_7219
 1998_17_0261-4189_24_7219
 1998_18_0270-7306_10_6102
 1998_18_0270-7306_9_5121
 1998_1_1097-2765_4_519
 1998_26_0305-1048_4_919
 1998_26_0305-1048_4_919
 1998_273_0021-9258_14_8369
 1998_273_0021-9258_31_19756
 1998_273_0021-9258_33_21332
 1998_273_0021-9258_34_22083
 1998_273_0021-9258_38_24543
 1998_273_0021-9258_38_24891
 1998_273_0021-9258_42_27137
 1998_273_0021-9258_45_30046
 1998_279_0036-8075_5357_1733
 1998_280_0036-8075_5363_593
 1998_2_1097-2765_1_23
 1998_2_1097-2765_2_173
 1998_32_0066-4197__561
 1998_3_1356-9597_11_737
 1998_67_0066-4154__721
 1998_8_0960-9822_21_R771
 1998_92_0092-8674_3_295
 1998_94_0092-8674_5_595
 1998_95_0027-8424_25_14757
 1998_95_0027-8424_25_14757
 1998_9_1059-1524_8_2107
 1999_13_0890-9369_10_1289
 1999_13_0890-9369_16_2159
 1999_13_0890-9369_20_2619
 1999_13_0890-9369_20_2639
 1999_13_0890-9369_2_146
 1999_13_0890-9369_6_637
 1999_13_0890-9369_7_827
 1999_146_0021-9525_4_709
 1999_151_0016-6731_4_1445
 1999_152_0016-6731_3_839
 1999_153_0016-6731_3_1171
 1999_18_0261-4189_19_5334
 1999_18_0261-4189_19_5334
 1999_18_0261-4189_21_6189
 1999_18_0261-4189_21_6189
 1999_18_0261-4189_2_396
 1999_18_0261-4189_2_396
 1999_18_0261-4189_9_2435
 1999_18_0261-4189_9_2435
 1999_18_1046-2023_3_329
 1999_18_1046-2023_3_407
 1999_19_0270-7306_10_7228
 1999_19_0270-7306_12_8003
 1999_19_0270-7306_1_646
 1999_19_0270-7306_2_1038
 1999_19_0270-7306_6_4270
 1999_19_0270-7306_7_4888
 1999_19_0270-7306_8_5652
 1999_19_0270-7306_9_6154
 1999_19_1046-2023_3_425
 1999_1_1465-7392_7_415
 1999_248_0014-4827_1_58
 1999_264_0014-2956_2_415
 1999_265_0014-2956_3_936
 1999_274_0021-9258_12_8291
 1999_274_0021-9258_13_9092
 1999_274_0021-9258_32_22283
 1999_274_0021-9258_36_25927
 1999_274_0021-9258_42_30310
 1999_3_1097-2765_4_477
 1999_3_1097-2765_5_679
 1999_436_1383-5742_1_1
 1999_63_1092-2172_2_349
 1999_68_0066-4154__649
 1999_96_0027-8424_16_9130
 1999_96_0027-8424_16_9130
 1999_96_0027-8424_20_11440
 1999_96_0027-8424_20_11440
 1999_96_0027-8424_22_12367
 1999_96_0027-8424_22_12367
 1999_96_0027-8424_26_14783
 1999_96_0027-8424_26_14783
 1999_96_0027-8424_2_441
 1999_96_0027-8424_2_441
 1999_96_0027-8424_6_2656
 1999_96_0027-8424_6_2656
 1999_96_0027-8424_6_2800
 1999_96_0027-8424_6_2800
 1999_96_0027-8424_7_3824
 1999_96_0027-8424_7_3824
 1999_96_0092-8674_3_415
 1999_98_0092-8674_2_249
 1999__0730-2312__1
 2000_100_0092-8674_4_479
 2000_102_0092-8674_3_303
 2000_10_0960-9822_24_1547
 2000_10_0960-9822_4_195
 2000_10_0960-9822_5_231
 2000_11_1059-1524_12_4117
 2000_129_1047-8477_2-3_198
 2000_12_0955-0674_3_280
 2000_12_0955-0674_3_280
 2000_12_0955-0674_6_690
 2000_12_0955-0674_6_690
 2000_14_0890-9369_13_1631
 2000_14_0890-9369_14_1765
 2000_14_0890-9369_18_2330
 2000_14_0890-9369_1_81
 2000_14_0890-9369_4_452
 2000_14_0890-9369_7_804
 2000_14_0890-9369_8_913
 2000_158_0168-9452_1-2_33
 2000_19_0261-4189_10_2323
 2000_19_0261-4189_10_2323
 2000_19_0261-4189_17_4774
 2000_19_0261-4189_17_4774
 2000_19_0261-4189_7_1681
 2000_19_0261-4189_7_1681
 2000_19_0261-4189_9_2082
 2000_19_0261-4189_9_2082
 2000_20_0270-7306_10_3667
 2000_20_0270-7306_15_5777
 2000_20_0270-7306_1_242
 2000_20_0270-7306_22_8602
 2000_20_0270-7306_8_2809
 2000_20_0270-7306_9_3086
 2000_245_0378-1119_1_13
 2000_261_0014-4827_1_271
 2000_275_0021-9258_12_8426
 2000_275_0021-9258_13_9734
 2000_275_0021-9258_20_15049
 2000_275_0021-9258_21_16235
 2000_275_0021-9258_24_18011
 2000_275_0021-9258_25_18871
 2000_275_0021-9258_45_34833
 2000_275_0021-9258_45_34983
 2000_275_0021-9258_45_35051
 2000_275_0021-9258_50_39773
 2000_275_0021-9258_8_5904
 2000_288_0036-8075_5471_1643
 2000_28_0305-1048_20_3846
 2000_28_0305-1048_20_3846
 2000_28_0305-1048_23_4769
 2000_28_0305-1048_23_4769
 2000_295_0022-2836_3_423
 2000_299_0022-2836_2_405
 2000_299_0022-2836_3_667
 2000_300_0022-2836_5_1133
 2000_4_1367-5931_5_581
 2000_5_1097-2765_1_85
 2000_5_1097-2765_4_617
 2000_5_1097-2765_5_789
 2000_5_1356-9597_12_975
 2000_5_1356-9597_6_439
 2000_69_0066-4154__829
 2000_97_0027-8424_26_14115
 2000_97_0027-8424_26_14115
 2000_97_0027-8424_4_1530
 2000_97_0027-8424_4_1530
 2000_97_0027-8424_6_2399
 2000_97_0027-8424_6_2399
 2001_11_0959-437X_1_64
 2001_11_0959-437X_1_64
 2001_11_0960-9822_17_1328
 2001_12_1059-1524_11_3386
 2001_12_1059-1524_11_3658
 2001_12_1059-1524_5_1257
 2001_12_1059-1524_6_1671
 2001_157_0016-6731_3_1179
 2001_159_0016-6731_2_471
 2001_15_0888-8809_1_1
 2001_15_0890-9369_9_1055
 2001_20_0261-4189_15_4263
 2001_20_0261-4189_15_4263
 2001_20_0261-4189_17_4648
 2001_20_0261-4189_17_4648
 2001_20_0261-4189_8_2097
 2001_20_0261-4189_8_2097
 2001_21_0270-7306_14_4495
 2001_21_0270-7306_14_4598
 2001_21_0270-7306_15_4875
 2001_21_0270-7306_17_5767
 2001_21_0270-7306_7_2581
 2001_21_0270-7306_9_3144
 2001_265_1617-4615_6_1039
 2001_276_0021-9258_18_15397
 2001_276_0021-9258_28_26189
 2001_276_0021-9258_28_26666
 2001_276_0021-9258_29_27345
 2001_276_0021-9258_32_30399
 2001_276_0021-9258_37_34428
 2001_276_0021-9258_46_42744
 2001_276_0021-9258_48_44905
 2001_276_0021-9258_52_49371
 2001_276_0021-9258_9_6337
 2001_294_0036-8075_5550_2301
 2001_29_0305-1048_22_4570
 2001_29_0305-1048_22_4570
 2001_29_0305-1048_23_4834
 2001_29_0305-1048_23_4834
 2001_308_0022-2836_4_597
 2001_412_0028-0836_6844_355
 2001_4_1368-7646_6_347
 2001_52_0022-0957_355_183
 2001_52_0022-0957_355_193
 2001_6_1356-9597_10_837
 2001_7_1097-2765_1_21
 2001_8_1097-2765_5_1093
 2001_98_0027-8424_15_8255
 2001_98_0027-8424_15_8255
 2001_98_0027-8424_15_8361
 2001_98_0027-8424_15_8361
 2001_98_0027-8424_18_10085
 2001_98_0027-8424_18_10085
 2001_98_0027-8424_1_54
 2001_98_0027-8424_1_54
 2001_98_0027-8424_20_11152
 2001_98_0027-8424_20_11152
 2001_98_0027-8424_20_11211
 2001_98_0027-8424_20_11211
 2001_98_0027-8424_23_13114
 2001_98_0027-8424_23_13114
 2001_98_0027-8424_5_2550
 2001_98_0027-8424_5_2550
 2001_98_0027-8424_6_3034
 2001_98_0027-8424_6_3034
 2001_98_0027-8424_9_4978
 2001_98_0027-8424_9_4978
 2002_109_0092-8674_7_849
 2002_115_0021-9533_14_2829
 2002_115_0021-9533_7_1435
 2002_12_1088-9051_1_37
 2002_13_1059-1524_2_607
 2002_140_1047-8477_1-3_17
 2002_159_0021-9525_2_225
 2002_160_0016-6731_4_1305
 2002_160_0016-6731_4_1319
 2002_161_0016-6731_1_47
 2002_162_0016-6731_3_1117
 2002_16_0890-9369_10_1182
 2002_16_0890-9369_22_2935
 2002_16_0890-9369_2_183
 2002_16_0890-9369_6_659
 2002_190_0021-9541_3_287
 2002_1_1568-7864_3_175
 2002_21_0261-4189_9_2168
 2002_21_0261-4189_9_2168
 2002_22_0270-7306_12_4202
 2002_22_0270-7306_13_4477
 2002_22_0270-7306_16_5669
 2002_22_0270-7306_4_1036
 2002_243_0012-1606_1_34
 2002_269_0014-2956_21_5192
 2002_277_0021-9258_10_8658
 2002_277_0021-9258_12_10354
 2002_277_0021-9258_18_15881
 2002_277_0021-9258_18_16033
 2002_277_0021-9258_19_16920
 2002_277_0021-9258_31_28099
 2002_277_0021-9258_35_31430
 2002_277_0021-9258_36_33049
 2002_277_0021-9258_40_37422
 2002_277_0021-9258_44_41706
 2002_277_0021-9258_45_42471
 2002_277_0021-9258_45_43121
 2002_277_0021-9258_4_2702
 2002_27_0968-0004_1_1
 2002_297_0036-8075_5583_1023
 2002_30_0305-1048_19_4176
 2002_30_0305-1048_19_4176
 2002_30_0305-1048_21_4728
 2002_30_0305-1048_21_4728
 2002_30_0305-1048_23_5205
 2002_30_0305-1048_23_5205
 2002_351_0076-6879__539
 2002_3_1469-221X_8_792
 2002_3_1469-221X_8_792
 2002_3_1471-0072_11_826
 2002_415_0028-0836_6872_651
 2002_46_0950-382X_4_997
 2002_71_0066-4154__333
 2002_7_1356-9597_6_523
 2002_7_1356-9597_6_523
 2002_99_0027-8424_1_101
 2002_99_0027-8424_1_101
 2002_99_0027-8424_3_1347
 2002_99_0027-8424_3_1347
 2002_9_1097-2765_3_481
 2002_9_1097-2765_4_799
 2002_9_1097-2765_5_1067
 2003_100_0027-8424_5_2334
 2003_100_0027-8424_5_2334
 2003_11_1097-2765_5_1323
 2003_14_1059-1524_9_3876
 2003_17_0890-9369_14_1755
 2003_17_0890-9369_18_2259
 2003_17_0890-9369_9_1141
 2003_17_0890-9369_9_1153
 2003_22_0261-4189_16_4294
 2003_22_0261-4189_16_4294
 2003_22_0261-4189_22_6115
 2003_22_0261-4189_22_6115
 2003_22_0261-4189_22_6148
 2003_22_0261-4189_22_6148
 2003_22_0261-4189_3_704
 2003_22_0261-4189_3_704
 2003_22_0261-4189_4_964
 2003_22_0261-4189_4_964
 2003_23_0270-7306_3_804
 2003_23_0270-7306_8_2733
 2003_26_0168-6445_5_533
 2003_270_0014-2956_6_1089
 2003_278_0021-9258_16_14082
 2003_278_0021-9258_27_24644
 2003_278_0021-9258_28_25408
 2003_278_0021-9258_30_27372
 2003_278_0021-9258_42_41528
 2003_278_0021-9258_49_49171
 2003_278_0021-9258_7_4491
 2003_302_0036-8075_5644_449
 2003_31_0305-1048_16_4888
 2003_31_0305-1048_16_4888
 2003_327_0022-2836_1_111
 2003_42_0006-2960_48_14207
 2003_4_1469-221X_1_26
 2003_4_1469-221X_1_26
 2003_532_0027-5107_1-2_29
 2003_532_0027-5107_1-2_5
 2003_553_0014-5793_1-2_213
 2003_56_0021-9746_5_368
 2003_5_1465-7392_10_845
 2003_5_1534-5807_5_735
 2003_8_1356-9597_2_145
 2003_8_1356-9597_5_465
 2004_113_0009-5915_3_145
 2004_14_0959-437X_1_17
 2004_14_0959-437X_1_17
 2004_14_0960-9822_18_R778
 2004_15_1059-1524_5_2230
 2004_1677_0167-4781_1-3_142
 2004_16_1040-4651_1_99
 2004_16_1097-2765_2_173
 2004_16_1097-2765_6_967
 2004_18_0890-9369_7_769
 2004_18_0890-9369_9_981
 2004_22_0734-9750_8_621
 2004_23_0261-4189_13_2651
 2004_23_0261-4189_18_3667
 2004_23_0261-4189_1_191
 2004_23_0950-9232_6_1206
 2004_24_0270-7306_11_4769
 2004_24_0270-7306_16_6891
 2004_24_0270-7306_17_7419
 2004_24_0270-7306_21_9568
 2004_24_0270-7306_23_10208
 2004_279_0021-9258_10_9625
 2004_279_0021-9258_14_14245
 2004_279_0021-9258_29_30807
 2004_279_0021-9258_34_35879
 2004_340_0022-2836_1_29
 2004_3_1535-9778_5_1154
 2004_574_0014-5793_1-3_192
 2004_5_1471-0072_10_848
 2004_67_0006-2952_7_1373
 2004_68_1092-2172_1_109
 2005_10_1356-9597_4_297
 2005_120_0092-8674_3_315
 2005_15_0960-9822_2_146
 2005_168_0021-9525_6_875
 2005_21_0168-9525_3_149
 2005_24_0950-9232_17_2827
 2005_25_0270-7306_15_6707
 2005_25_0270-7306_4_1560
 2005_33_0305-1048_8_2410
 2005_33_0305-1048_9_3033
 2005_347_0022-2836_3_509
 2005_40_1040-9238_2_115
 2005_579_0014-5793_4_877
 2005_6_1471-0072_6_476
 
	Citances for PMID: 9288745
 1997_11_0890-9369_24_3365
 1997_11_0890-9369_24_3375
 1997_90_0092-8674_4_649
 1997_91_0092-8674_1_35
 1997_91_0092-8674_6_717
 1997_94_0027-8424_23_12491
 1997_94_0027-8424_23_12491
 1998_10_0955-0674_3_304
 1998_10_0955-0674_3_304
 1998_10_0955-0674_6_742
 1998_10_0955-0674_6_742
 1998_12_0890-9369_14_2120
 1998_12_0890-9369_4_480
 1998_12_0890-9369_5_734
 1998_1398_0167-4781_2_113
 1998_140_0021-9525_2_271
 1998_17_0261-4189_10_2961
 1998_17_0261-4189_14_4139
 1998_17_0261-4189_14_4139
 1998_17_0261-4189_17_5182
 1998_17_0261-4189_17_5182
 1998_17_0261-4189_19_5689
 1998_17_0261-4189_19_5689
 1998_17_0261-4189_19_5699
 1998_17_0261-4189_19_5699
 1998_17_0261-4189_23_6963
 1998_17_0261-4189_23_6963
 1998_17_0261-4189_24_7219
 1998_17_0261-4189_24_7219
 1998_17_0261-4189_2_498
 1998_18_0270-7306_10_6102
 1998_18_0270-7306_11_6679
 1998_1_1097-2765_3_457
 1998_1_1097-2765_4_519
 1998_245_0014-4827_2_282
 1998_273_0021-9258_14_8369
 1998_273_0021-9258_27_17095
 1998_273_0021-9258_34_22083
 1998_273_0021-9258_38_24543
 1998_273_0021-9258_38_24891
 1998_273_0021-9258_3_1298
 1998_273_0021-9258_49_32421
 1998_280_0036-8075_5363_593
 1998_281_0022-2836_4_631
 1998_29_0950-382X_4_955
 1998_2_1097-2765_1_23
 1998_2_1097-2765_2_173
 1998_3_1356-9597_11_737
 1998_3_1356-9597_3_157
 1998_62_1092-2172_4_1191
 1998_8_0959-437X_2_194
 1998_8_0959-437X_2_194
 1998_8_0960-9822_4_239
 1998_92_0092-8674_3_295
 1998_93_0092-8674_6_1067
 1998_95_0027-8424_25_14757
 1998_95_0027-8424_25_14757
 1998_95_0027-8424_5_2384
 1998_95_0027-8424_5_2384
 1998_95_0027-8424_7_3603
 1998_95_0027-8424_7_3603
 1998_9_1059-1524_8_2107
 1999_10_1059-1524_3_757
 1999_10_1059-1524_8_2631
 1999_13_0890-9369_16_2159
 1999_13_0890-9369_20_2619
 1999_13_0890-9369_20_2639
 1999_145_0021-9525_5_979
 1999_146_0021-9525_4_709
 1999_151_0016-6731_4_1445
 1999_152_0016-6731_3_839
 1999_18_0261-4189_19_5334
 1999_18_0261-4189_19_5334
 1999_18_0261-4189_20_5703
 1999_18_0261-4189_20_5703
 1999_18_0261-4189_2_396
 1999_18_0261-4189_2_396
 1999_18_0261-4189_9_2435
 1999_18_0261-4189_9_2435
 1999_18_0950-9232_14_2299
 1999_18_1046-2023_3_407
 1999_19_0270-7306_10_7228
 1999_19_0270-7306_12_8003
 1999_19_0270-7306_1_646
 1999_19_0270-7306_2_1038
 1999_19_0270-7306_2_1226
 1999_19_0270-7306_6_4270
 1999_19_0270-7306_7_4888
 1999_19_0270-7306_9_6154
 1999_19_1046-2023_3_425
 1999_1_1465-7392_7_415
 1999_264_0014-2956_2_415
 1999_274_0021-9258_12_8291
 1999_274_0021-9258_13_9092
 1999_274_0021-9258_36_25927
 1999_274_0021-9258_42_30310
 1999_3_1097-2765_4_477
 1999_436_1383-5742_1_1
 1999_4_1097-2765_1_11
 1999_4_1356-9597_2_111
 1999_68_0066-4154__649
 1999_96_0027-8424_11_6193
 1999_96_0027-8424_11_6193
 1999_96_0027-8424_16_9130
 1999_96_0027-8424_16_9130
 1999_96_0027-8424_26_14783
 1999_96_0027-8424_26_14783
 1999_96_0027-8424_2_441
 1999_96_0027-8424_2_441
 1999_97_0092-8674_3_299
 1999_98_0092-8674_6_847
 2000_102_0092-8674_3_303
 2000_10_0960-9822_15_896
 2000_10_0960-9822_24_1557
 2000_10_0960-9822_4_195
 2000_10_0960-9822_5_231
 2000_113_0021-9533_11_1929
 2000_11_1059-1524_12_4117
 2000_129_1047-8477_2-3_198
 2000_12_0955-0674_3_280
 2000_12_0955-0674_3_280
 2000_14_0890-9369_13_1631
 2000_14_0890-9369_14_1765
 2000_14_0890-9369_18_2330
 2000_14_0890-9369_19_2526
 2000_14_0890-9369_8_913
 2000_158_0168-9452_1-2_33
 2000_19_0261-4189_13_3418
 2000_19_0261-4189_13_3418
 2000_19_0261-4189_17_4774
 2000_19_0261-4189_17_4774
 2000_19_0261-4189_7_1681
 2000_19_0261-4189_7_1681
 2000_19_0261-4189_9_2082
 2000_19_0261-4189_9_2082
 2000_1_1469-221X_6_479
 2000_20_0270-7306_11_3795
 2000_20_0270-7306_13_4483
 2000_20_0270-7306_1_242
 2000_20_0270-7306_22_8602
 2000_20_0270-7306_8_2809
 2000_20_0270-7306_9_3086
 2000_25_0968-0004_3_99
 2000_275_0021-9258_12_8426
 2000_275_0021-9258_13_9734
 2000_275_0021-9258_20_15049
 2000_275_0021-9258_21_16235
 2000_275_0021-9258_25_18871
 2000_275_0021-9258_41_32098
 2000_275_0021-9258_45_34833
 2000_275_0021-9258_45_34983
 2000_275_0021-9258_45_35051
 2000_275_0021-9258_6_4239
 2000_275_0021-9258_8_5904
 2000_275_0021-9258_9_6337
 2000_288_0036-8075_5471_1643
 2000_28_0305-1048_23_4769
 2000_28_0305-1048_23_4769
 2000_28_0891-5849_9_1387
 2000_299_0022-2836_3_667
 2000_484_0014-5793_1_17
 2000_5_1097-2765_1_85
 2000_5_1097-2765_2_243
 2000_5_1356-9597_12_975
 2000_69_0066-4154__829
 2000_6_1097-2765_3_637
 2000_97_0027-8424_26_14115
 2000_97_0027-8424_26_14115
 2000_97_0027-8424_4_1530
 2000_97_0027-8424_4_1530
 2001_114_0021-9533_8_1447
 2001_12_1059-1524_11_3386
 2001_12_1059-1524_11_3658
 2001_12_1059-1524_5_1257
 2001_159_0016-6731_1_17
 2001_15_0888-8809_1_1
 2001_15_0890-9369_18_2457
 2001_15_0890-9369_9_1055
 2001_183_0021-9193_18_5459
 2001_183_0021-9193_18_5459
 2001_20_0261-4189_15_4253
 2001_20_0261-4189_15_4253
 2001_20_0261-4189_15_4263
 2001_20_0261-4189_15_4263
 2001_20_0261-4189_17_4648
 2001_20_0261-4189_17_4648
 2001_20_0261-4189_17_4836
 2001_20_0261-4189_17_4836
 2001_20_0261-4189_8_2097
 2001_20_0261-4189_8_2097
 2001_21_0270-7306_17_5767
 2001_21_0270-7306_7_2581
 2001_265_1617-4615_6_1039
 2001_276_0021-9258_17_13902
 2001_276_0021-9258_28_26189
 2001_276_0021-9258_37_34428
 2001_276_0021-9258_48_44905
 2001_276_0021-9258_51_48000
 2001_276_0021-9258_51_48526
 2001_276_0021-9258_52_49371
 2001_294_0036-8075_5543_867
 2001_35_0066-4197__673
 2001_412_0028-0836_6844_355
 2001_4_1368-7646_6_347
 2001_52_0022-0957_355_183
 2001_6_1356-9597_10_837
 2001_7_1078-0432_9_2712
 2001_7_1097-2765_1_21
 2001_7_1097-2765_4_767
 2001_7_1097-2765_6_1213
 2001_8_1097-2765_5_1093
 2001_98_0027-8424_15_8361
 2001_98_0027-8424_15_8361
 2001_98_0027-8424_18_10085
 2001_98_0027-8424_18_10085
 2001_98_0027-8424_1_54
 2001_98_0027-8424_1_54
 2001_98_0027-8424_20_11152
 2001_98_0027-8424_20_11152
 2001_98_0027-8424_23_13114
 2001_98_0027-8424_23_13114
 2001_98_0027-8424_6_3034
 2001_98_0027-8424_6_3034
 2002_109_0092-8674_7_849
 2002_115_0021-9533_14_2829
 2002_115_0021-9533_1_51
 2002_12_0960-9822_12_973
 2002_13_1059-1524_2_435
 2002_13_1059-1524_2_607
 2002_140_1047-8477_1-3_17
 2002_160_0016-6731_4_1319
 2002_16_0890-9369_1_101
 2002_16_0890-9369_6_659
 2002_22_0270-7306_12_4136
 2002_22_0270-7306_12_4202
 2002_22_0270-7306_13_4477
 2002_243_0012-1606_1_34
 2002_269_0014-2956_21_5192
 2002_277_0021-9258_12_10354
 2002_277_0021-9258_13_11174
 2002_277_0021-9258_14_12118
 2002_277_0021-9258_18_15881
 2002_277_0021-9258_18_16033
 2002_277_0021-9258_19_16920
 2002_277_0021-9258_28_25431
 2002_277_0021-9258_31_28099
 2002_277_0021-9258_34_30824
 2002_277_0021-9258_36_33049
 2002_277_0021-9258_44_41706
 2002_277_0021-9258_4_2702
 2002_295_0006-291X_3_575
 2002_30_0305-1048_19_4176
 2002_30_0305-1048_19_4176
 2002_32_0960-7412_3_317
 2002_71_0066-4154__333
 2002_76_0022-538X_7_3158
 2002_76_0022-538X_7_3158
 2002_7_1356-9597_6_523
 2002_7_1356-9597_6_523
 2002_7_1356-9597_8_821
 2002_99_0027-8424_1_101
 2002_99_0027-8424_1_101
 2002_99_0027-8424_3_1347
 2002_99_0027-8424_3_1347
 2003_100_0027-8424_18_10440
 2003_100_0027-8424_18_10440
 2003_114_0092-8674_1_135
 2003_11_1097-2765_5_1201
 2003_11_1097-2765_5_1301
 2003_14_1059-1524_8_3230
 2003_14_1059-1524_9_3876
 2003_17_0890-9369_14_1789
 2003_17_0890-9369_9_1153
 2003_22_0261-4189_16_4294
 2003_22_0261-4189_16_4294
 2003_22_0261-4189_22_6115
 2003_22_0261-4189_22_6115
 2003_22_0261-4189_3_704
 2003_22_0261-4189_3_704
 2003_23_0270-7306_24_9178
 2003_270_0014-2956_6_1089
 2003_278_0021-9258_11_9754
 2003_278_0021-9258_28_25408
 2003_278_0021-9258_42_41528
 2003_278_0021-9258_42_41535
 2003_278_0021-9258_7_4491
 2003_278_0021-9258_8_6093
 2003_306_0006-291X_4_851
 2003_31_0305-1048_16_4888
 2003_31_0305-1048_16_4888
 2003_327_0022-2836_1_111
 2003_532_0027-5107_1-2_5
 2003_77_0022-538X_12_6946
 2003_77_0022-538X_12_6946
 2004_113_0009-5915_3_113
 2004_117_0092-8674_4_441
 2004_14_0960-9822_18_R778
 2004_14_0960-9822_9_752
 2004_15_1059-1524_5_2230
 2004_165_0002-9440_4_1351
 2004_18_0890-9369_7_769
 2004_18_0890-9369_9_981
 2004_22_0734-9750_8_621
 2004_24_0270-7306_4_1614
 2004_279_0021-9258_10_9625
 2004_279_0021-9258_29_30807
 2004_279_0021-9258_34_35879
 2004_340_0022-2836_1_29
 2004_340_0022-2836_2_195
 2004_51_0950-382X_2_349
 2004_68_1092-2172_1_109
 2005_10_1356-9597_4_297
 2005_120_0092-8674_3_315
 2005_15_0960-9822_2_146
 2005_19_0890-9369_2_255
 2005_25_0270-7306_15_6707
 2005_280_0021-9258_12_11943
 2005_33_0305-1048_2_765
 2005_33_0305-1048_8_2410
 2005_347_0022-2836_3_509
 2005_44_0006-2960_8_2916
 
	Citances for PMID: 9159120
 1997_11_0890-9369_24_3365
 1997_16_0261-4189_19_5966
 1997_16_0261-4189_19_5966
 1997_90_0092-8674_4_649
 1997_91_0092-8674_1_59
 1997_91_0092-8674_6_717
 1997_94_0027-8424_11_5611
 1997_94_0027-8424_11_5611
 1997_94_0027-8424_23_12491
 1997_94_0027-8424_23_12491
 1997_94_0027-8424_23_12521
 1997_94_0027-8424_23_12521
 1998_10_0955-0674_3_304
 1998_10_0955-0674_3_304
 1998_10_0955-0674_6_742
 1998_10_0955-0674_6_742
 1998_12_0890-9369_14_2120
 1998_12_0890-9369_4_480
 1998_1398_0167-4781_2_113
 1998_149_0016-6731_3_1221
 1998_17_0261-4189_10_2961
 1998_17_0261-4189_14_4139
 1998_17_0261-4189_14_4139
 1998_17_0261-4189_17_5182
 1998_17_0261-4189_17_5182
 1998_17_0261-4189_19_5699
 1998_17_0261-4189_19_5699
 1998_17_0261-4189_23_6963
 1998_17_0261-4189_23_6963
 1998_17_0261-4189_24_7219
 1998_17_0261-4189_24_7219
 1998_17_0261-4189_2_498
 1998_18_0270-7306_10_6102
 1998_18_0270-7306_11_6679
 1998_1_1097-2765_4_519
 1998_23_0968-0004_2_79
 1998_245_0014-4827_2_282
 1998_273_0021-9258_13_7320
 1998_273_0021-9258_14_8369
 1998_273_0021-9258_27_17095
 1998_273_0021-9258_34_22083
 1998_273_0021-9258_38_24543
 1998_273_0021-9258_38_24891
 1998_273_0021-9258_3_1298
 1998_273_0021-9258_49_32421
 1998_280_0036-8075_5363_593
 1998_2_1097-2765_1_23
 1998_2_1097-2765_2_173
 1998_3_1356-9597_11_737
 1998_3_1356-9597_3_157
 1998_62_1092-2172_4_1191
 1998_8_0959-437X_2_194
 1998_8_0959-437X_2_194
 1998_92_0092-8674_3_295
 1998_95_0027-8424_7_3603
 1998_95_0027-8424_7_3603
 1998_9_1059-1524_7_1833
 1998_9_1059-1524_8_2107
 1999_10_1059-1524_8_2631
 1999_112_0021-9533_12_2011
 1999_13_0890-9369_16_2159
 1999_13_0890-9369_20_2639
 1999_151_0016-6731_4_1445
 1999_152_0016-6731_3_839
 1999_18_0261-4189_19_5334
 1999_18_0261-4189_19_5334
 1999_18_0261-4189_20_5703
 1999_18_0261-4189_20_5703
 1999_18_0261-4189_2_396
 1999_18_0261-4189_2_396
 1999_18_0261-4189_9_2435
 1999_18_0261-4189_9_2435
 1999_18_0950-9232_14_2299
 1999_18_1046-2023_3_329
 1999_19_0270-7306_10_7228
 1999_19_0270-7306_12_8003
 1999_19_0270-7306_2_1226
 1999_19_0270-7306_6_4270
 1999_19_0270-7306_8_5535
 1999_19_0270-7306_9_6154
 1999_1_1465-7392_7_415
 1999_264_0014-2956_2_415
 1999_274_0021-9258_12_8291
 1999_274_0021-9258_36_25927
 1999_3_1097-2765_4_477
 1999_68_0066-4154__649
 1999_96_0027-8424_11_6193
 1999_96_0027-8424_11_6193
 1999_96_0027-8424_22_12367
 1999_96_0027-8424_22_12367
 1999_96_0027-8424_26_14783
 1999_96_0027-8424_26_14783
 1999_96_0027-8424_2_441
 1999_96_0027-8424_2_441
 2000_10_0960-9822_24_1547
 2000_10_0960-9822_4_195
 2000_10_0960-9822_5_231
 2000_113_0021-9533_11_1929
 2000_11_1059-1524_12_4117
 2000_129_1047-8477_2-3_186
 2000_129_1047-8477_2-3_198
 2000_14_0890-9369_12_1528
 2000_14_0890-9369_13_1631
 2000_14_0890-9369_14_1765
 2000_14_0890-9369_8_913
 2000_158_0168-9452_1-2_33
 2000_19_0261-4189_13_3418
 2000_19_0261-4189_13_3418
 2000_19_0261-4189_7_1681
 2000_19_0261-4189_7_1681
 2000_19_0261-4189_9_2082
 2000_19_0261-4189_9_2082
 2000_1_1469-221X_6_479
 2000_20_0270-7306_10_3667
 2000_20_0270-7306_1_242
 2000_20_0270-7306_22_8602
 2000_20_0270-7306_8_2809
 2000_20_0270-7306_9_3086
 2000_245_0378-1119_1_13
 2000_259_0014-4827_1_86
 2000_275_0021-9258_12_8426
 2000_275_0021-9258_25_18871
 2000_275_0021-9258_45_35051
 2000_275_0021-9258_8_5904
 2000_288_0036-8075_5471_1643
 2000_28_0305-1048_23_4769
 2000_28_0305-1048_23_4769
 2000_28_0305-1048_2_472
 2000_28_0305-1048_2_472
 2000_299_0022-2836_3_667
 2000_4_1367-5931_5_581
 2000_5_1097-2765_1_85
 2000_5_1356-9597_12_975
 2000_69_0066-4154__829
 2000_6_1097-2765_3_637
 2000_97_0027-8424_26_14115
 2000_97_0027-8424_26_14115
 2000_97_0027-8424_4_1530
 2000_97_0027-8424_4_1530
 2001_114_0021-9533_8_1447
 2001_12_1059-1524_11_3658
 2001_12_1059-1524_5_1257
 2001_15_0890-9369_2_147
 2001_183_0021-9193_18_5459
 2001_183_0021-9193_18_5459
 2001_18_0749-503X_4_291
 2001_20_0261-4189_13_3293
 2001_20_0261-4189_13_3293
 2001_20_0261-4189_15_4253
 2001_20_0261-4189_15_4253
 2001_20_0261-4189_15_4263
 2001_20_0261-4189_15_4263
 2001_20_0261-4189_17_4648
 2001_20_0261-4189_17_4648
 2001_20_0261-4189_8_2097
 2001_20_0261-4189_8_2097
 2001_276_0021-9258_48_44905
 2001_276_0021-9258_51_48000
 2001_276_0021-9258_51_48526
 2001_276_0021-9258_52_49371
 2001_308_0022-2836_4_597
 2001_412_0028-0836_6844_355
 2001_4_1368-7646_6_347
 2001_52_0022-0957_355_183
 2001_6_1356-9597_10_837
 2001_98_0027-8424_15_8361
 2001_98_0027-8424_15_8361
 2001_98_0027-8424_18_10085
 2001_98_0027-8424_18_10085
 2001_98_0027-8424_20_11211
 2001_98_0027-8424_20_11211
 2001_98_0027-8424_6_3034
 2001_98_0027-8424_6_3034
 2002_109_0092-8674_7_849
 2002_10_1097-2765_5_1223
 2002_115_0021-9533_14_2829
 2002_12_0962-8924_2_72
 2002_13_1059-1524_1_52
 2002_13_1059-1524_2_435
 2002_13_1059-1524_4_1298
 2002_140_1047-8477_1-3_17
 2002_160_0016-6731_4_1319
 2002_21_0261-4189_12_3148
 2002_21_0261-4189_12_3148
 2002_21_0261-4189_6_1437
 2002_21_0261-4189_6_1437
 2002_21_0950-9232_43_6624
 2002_22_0270-7306_13_4477
 2002_243_0012-1606_1_34
 2002_277_0021-9258_14_12118
 2002_277_0021-9258_18_16033
 2002_277_0021-9258_19_16920
 2002_277_0021-9258_28_25431
 2002_277_0021-9258_34_30824
 2002_277_0021-9258_36_33049
 2002_277_0021-9258_44_41706
 2002_277_0021-9258_4_2702
 2002_30_0305-1048_19_4176
 2002_30_0305-1048_19_4176
 2002_351_0076-6879__184
 2002_3_1469-221X_8_780
 2002_3_1471-0072_11_826
 2002_4_1465-7392_3_198
 2002_99_0027-8424_1_101
 2002_99_0027-8424_1_101
 2002_99_0027-8424_3_1347
 2002_99_0027-8424_3_1347
 2002_9_1097-2765_3_471
 2003_114_0092-8674_1_135
 2003_116_0021-9533_19_3971
 2003_11_1097-2765_5_1323
 2003_14_1059-1524_9_3876
 2003_22_0261-4189_22_6148
 2003_22_0261-4189_22_6148
 2003_23_0270-7306_19_6769
 2003_26_0168-6445_5_533
 2003_278_0021-9258_28_25408
 2003_278_0021-9258_33_30854
 2003_278_0021-9258_42_41528
 2003_278_0021-9258_47_46424
 2003_278_0021-9258_7_4491
 2003_371_0076-6879__491
 2003_48_0950-382X_3_605
 2003_532_0027-5107_1-2_5
 2003_553_0014-5793_1-2_213
 2003_56_0021-9746_5_368
 2004_113_0009-5915_3_113
 2004_13_1097-2765_4_549
 2004_165_0021-9525_2_181
 2004_16_1097-2765_2_173
 2004_16_1097-2765_6_967
 2004_23_0261-4189_15_3122
 2004_279_0021-9258_10_9625
 2004_279_0021-9258_29_30807
 2004_340_0022-2836_1_29
 2004_68_1092-2172_1_109
 2005_10_1356-9597_4_297
 2005_24_0950-9232_17_2827
 2005_33_0305-1048_2_765
 2005_579_0014-5793_4_877
 2005_6_1471-0072_6_476
 2005_77_0003-2700_10_3198
 
	Citances for PMID: 10490657
 1999_19_0270-7306_10_6699
 1999_19_0270-7306_10_7228
 2000_101_0092-8674_3_307
 2000_10_0959-437X_2_178
 2000_10_0959-437X_2_178
 2000_19_0261-4189_7_1681
 2000_19_0261-4189_7_1681
 2000_3_1369-5274_6_631
 2000_69_0066-4154__829
 2001_159_0016-6731_2_471
 2001_276_0021-9258_28_26189
 2001_294_0036-8075_5540_96
 2001_98_0027-8424_23_13114
 2001_98_0027-8424_23_13114
 2002_160_0016-6731_4_1305
 2002_71_0066-4154__333
 2002_99_0027-8424_1_101
 2002_99_0027-8424_1_101
 2003_22_0261-4189_16_4294
 2003_22_0261-4189_16_4294
 2003_278_0021-9258_42_41535
 2003_31_0305-1048_16_4888
 2003_31_0305-1048_16_4888
 2004_14_0959-437X_1_17
 2004_14_0959-437X_1_17
 2004_15_1059-1524_12_5219
 2004_5_1471-0072_10_848
 2004_68_1092-2172_1_109
 
	Citances for PMID: 10846177
 2000_1_1469-221X_4_319
 2000_1_1469-221X_4_319
 2000_275_0021-9258_37_29042
 2000_275_0021-9258_50_39773
 2000_3_1369-5274_6_631
 2001_12_1059-1524_5_1257
 2001_276_0021-9258_33_31376
 2001_276_0021-9258_46_42744
 2001_75_0022-538X_13_6121
 2001_75_0022-538X_13_6121
 2002_190_0021-9541_3_287
 2002_21_0261-4189_12_3171
 2002_21_0261-4189_12_3171
 2002_21_0950-9232_51_7786
 2002_22_0270-7306_18_6592
 2002_22_0270-7306_1_309
 2002_277_0021-9258_1_502
 2002_277_0021-9258_43_40520
 2002_71_0066-4154__333
 2002_76_0022-538X_6_2964
 2002_76_0022-538X_6_2964
 2002_7_1356-9597_6_523
 2002_7_1356-9597_6_523
 2003_100_0027-8424_5_2334
 2003_100_0027-8424_5_2334
 2003_11_1097-2765_1_203
 2003_278_0021-9258_42_41083
 2003_327_0022-2836_1_111
 2003_44_0172-8083_1_38
 2003_4_1469-221X_1_42
 2003_4_1469-221X_1_42
 2003_532_0027-5107_1-2_29
 2003_77_0022-538X_19_10566
 2003_77_0022-538X_19_10566
 2003_77_0022-538X_4_2369
 2003_77_0022-538X_4_2369
 2003_8_1356-9597_2_145
 2003_8_1356-9597_5_451
 2004_68_1092-2172_1_109
 2005_10_1356-9597_6_551
 2005_280_0021-9258_13_13062
 2005_33_0305-1048_9_3033
 
	Citances for PMID: 9407029
 1997_11_0890-9369_24_3365
 1998_10_0955-0674_3_304
 1998_10_0955-0674_3_304
 1998_10_0955-0674_6_742
 1998_10_0955-0674_6_742
 1998_12_0890-9369_4_480
 1998_1398_0167-4781_2_113
 1998_18_0270-7306_10_6102
 1998_273_0021-9258_14_8369
 1998_273_0021-9258_34_22083
 1998_273_0021-9258_38_24891
 1998_2_1097-2765_2_173
 1998_95_0027-8424_25_14693
 1998_95_0027-8424_25_14693
 1999_13_0890-9369_16_2159
 1999_151_0016-6731_3_965
 1999_18_0261-4189_19_5334
 1999_18_0261-4189_19_5334
 1999_18_0261-4189_20_5703
 1999_18_0261-4189_20_5703
 1999_18_1046-2023_3_329
 1999_19_0270-7306_12_8003
 1999_19_0270-7306_2_1226
 1999_19_0270-7306_6_4270
 1999_19_0270-7306_7_4888
 1999_19_0270-7306_7_5083
 1999_19_0270-7306_8_5535
 1999_68_0066-4154__649
 1999_96_0027-8424_15_8443
 1999_96_0027-8424_15_8443
 1999_96_0027-8424_6_2800
 1999_96_0027-8424_6_2800
 2000_10_0960-9822_4_195
 2000_113_0021-9533_12_2111
 2000_14_0890-9369_12_1528
 2000_14_0890-9369_8_913
 2000_1_1469-221X_4_319
 2000_1_1469-221X_4_319
 2000_20_0270-7306_10_3667
 2000_20_0270-7306_11_3795
 2000_20_0270-7306_1_242
 2000_20_0270-7306_21_7922
 2000_20_0270-7306_9_3086
 2000_245_0378-1119_1_13
 2000_275_0006-291X_1_228
 2000_275_0021-9258_24_18011
 2000_275_0021-9258_25_18871
 2000_275_0021-9258_37_29042
 2000_275_0021-9258_45_34833
 2000_275_0021-9258_45_35051
 2000_275_0021-9258_50_39773
 2000_275_0021-9258_9_6337
 2000_300_0022-2836_3_421
 2000_5_1356-9597_12_975
 2000_5_1356-9597_6_463
 2000_69_0066-4154__829
 2000_97_0027-8424_6_2399
 2000_97_0027-8424_6_2399
 2001_114_0021-9533_8_1447
 2001_12_1059-1524_5_1257
 2001_15_0890-9369_2_134
 2001_20_0261-4189_8_2097
 2001_20_0261-4189_8_2097
 2001_264_0378-1119_2_249
 2001_265_1617-4615_6_1039
 2001_276_0021-9258_28_26189
 2001_276_0021-9258_46_42744
 2001_276_0021-9258_51_48000
 2001_276_0021-9258_52_49371
 2001_31_0014-2980_9_2539
 2001_98_0027-8424_1_54
 2001_98_0027-8424_1_54
 2001_98_0027-8424_20_11211
 2001_98_0027-8424_20_11211
 2002_13_1059-1524_2_607
 2002_159_0021-9525_2_225
 2002_161_0016-6731_2_521
 2002_190_0021-9541_3_287
 2002_21_0261-4189_12_3171
 2002_21_0261-4189_12_3171
 2002_21_0261-4189_9_2168
 2002_21_0261-4189_9_2168
 2002_22_0270-7306_13_4477
 2002_22_0270-7306_1_309
 2002_243_0012-1606_1_34
 2002_277_0021-9258_34_30824
 2002_277_0021-9258_43_40520
 2002_277_0021-9258_44_41706
 2002_71_0066-4154__333
 2002_76_0022-538X_7_3350
 2002_76_0022-538X_7_3350
 2002_7_1356-9597_6_523
 2002_7_1356-9597_6_523
 2002_7_1356-9597_8_821
 2002_99_0027-8424_25_16087
 2002_99_0027-8424_25_16087
 2003_11_1097-2765_1_203
 2003_26_0168-6445_5_533
 2003_278_0021-9258_11_9754
 2003_278_0021-9258_29_26750
 2003_278_0021-9258_42_41083
 2003_327_0022-2836_1_111
 2003_44_0172-8083_1_38
 2003_4_1469-221X_1_42
 2003_4_1469-221X_1_42
 2003_532_0027-5107_1-2_21
 2003_532_0027-5107_1-2_29
 2003_8_1356-9597_2_145
 2004_131_0950-1991_19_4807
 2004_16_1097-2765_2_173
 2004_22_0734-9750_8_621
 2004_279_0021-9258_38_39636
 2004_68_1092-2172_1_109
 2005_10_1356-9597_6_551
 2005_21_0168-9525_3_149
 2005_24_0950-9232_17_2827
 2005_280_0021-9258_12_11943
 2005_33_0305-1048_8_2410
 2005_347_0022-2836_3_509
 2005_4_1535-9778_1_166
 2005_87_0300-9084_7_591
 
	Citances for PMID: 10373538
 1999_18_0261-4189_19_5334
 1999_18_0261-4189_19_5334
 1999_18_0261-4189_20_5703
 1999_18_0261-4189_20_5703
 1999_19_0270-7306_7_4888
 2000_10_0959-437X_2_178
 2000_10_0959-437X_2_178
 2000_10_0960-9822_4_195
 2000_113_0021-9533_12_2111
 2000_14_0890-9369_12_1528
 2000_1_1469-221X_4_319
 2000_1_1469-221X_4_319
 2000_20_0270-7306_11_3795
 2000_20_0270-7306_20_7613
 2000_20_0270-7306_9_3086
 2000_275_0006-291X_1_228
 2000_275_0021-9258_24_18011
 2000_275_0021-9258_45_35051
 2000_5_1356-9597_6_463
 2000_69_0066-4154__829
 2001_114_0021-9533_8_1447
 2001_11_0960-9822_9_R367
 2001_154_0021-9525_1_85
 2001_21_0270-7306_11_3692
 2001_264_0378-1119_2_249
 2001_276_0021-9258_46_42744
 2002_161_0016-6731_1_47
 2002_16_0890-9369_17_2179
 2002_190_0021-9541_3_287
 2002_21_0261-4189_12_3171
 2002_21_0261-4189_12_3171
 2002_21_0950-9232_51_7786
 2002_22_0270-7306_13_4477
 2002_22_0270-7306_1_309
 2002_277_0021-9258_43_40520
 2002_71_0066-4154__333
 2003_532_0027-5107_1-2_29
 2003_8_1356-9597_5_451
 2004_14_0960-9822_18_R778
 2004_167_0016-6731_4_1597
 2004_68_1092-2172_1_109
 2005_10_1356-9597_6_551
 2005_24_0950-9232_17_2827
 2005_4_1535-9778_1_166
 
	Citances for PMID: 9892652
 1999_10_1059-1524_10_3263
 1999_10_1059-1524_8_2631
 1999_18_0261-4189_19_5334
 1999_18_0261-4189_19_5334
 1999_18_0261-4189_23_6642
 1999_18_0261-4189_23_6642
 1999_1_1465-7392_7_415
 1999_62_0888-7543_1_11
 1999_96_0027-8424_11_6193
 1999_96_0027-8424_11_6193
 1999_96_0027-8424_2_441
 1999_96_0027-8424_2_441
 2000_10_0959-437X_2_178
 2000_10_0959-437X_2_178
 2000_11_1059-1524_12_4117
 2000_11_1059-1524_5_1673
 2000_129_1047-8477_2-3_186
 2000_12_0955-0674_3_280
 2000_12_0955-0674_3_280
 2000_14_0890-9369_13_1631
 2000_14_0890-9369_18_2330
 2000_1_1469-221X_6_479
 2000_20_0270-7306_22_8602
 2000_20_0270-7306_9_3086
 2000_245_0378-1119_1_13
 2000_275_0021-9258_12_8426
 2000_288_0036-8075_5471_1643
 2000_69_0066-4154__829
 2000_6_1097-2765_3_637
 2000_8_0966-842X_6_278
 2000_97_0027-8424_26_14115
 2000_97_0027-8424_26_14115
 2001_114_0021-9533_11_2027
 2001_12_1059-1524_11_3658
 2001_183_0021-9193_18_5459
 2001_183_0021-9193_18_5459
 2001_20_0261-4189_15_4253
 2001_20_0261-4189_15_4253
 2001_276_0021-9258_48_44905
 2001_276_0021-9258_9_6337
 2001_308_0022-2836_4_597
 2001_98_0027-8424_15_8361
 2001_98_0027-8424_15_8361
 2001_98_0027-8424_20_11211
 2001_98_0027-8424_20_11211
 2002_109_0092-8674_7_849
 2002_13_1059-1524_4_1298
 2002_140_1047-8477_1-3_17
 2002_16_0890-9369_20_2639
 2002_21_0261-4189_12_3148
 2002_21_0261-4189_12_3148
 2002_22_0270-7306_4_1036
 2002_269_0014-2956_3_1040
 2002_277_0021-9258_18_16033
 2002_277_0021-9258_35_31430
 2002_71_0066-4154__333
 2002_99_0027-8424_1_101
 2002_99_0027-8424_1_101
 2002_99_0027-8424_3_1347
 2002_99_0027-8424_3_1347
 2003_114_0092-8674_1_135
 2003_14_1059-1524_11_4592
 2003_26_0168-6445_5_533
 2003_278_0021-9258_33_30854
 2003_278_0021-9258_47_46424
 2003_278_0021-9258_49_48524
 2003_31_0305-1048_2_619
 2003_31_0305-1048_2_619
 2003_532_0027-5107_1-2_5
 2004_11_1074-5521_7_915
 2004_15_1059-1524_5_2230
 2004_16_1097-2765_6_967
 2004_18_0890-9369_7_769
 2004_23_0261-4189_13_2651
 2004_23_0261-4189_9_1957
 2004_24_0270-7306_4_1614
 2004_279_0021-9258_10_9625
 2004_340_0022-2836_1_29
 2004_68_1092-2172_1_109
 2005_24_0950-9232_17_2827
 2005_25_0270-7306_4_1560
 2005_346_0022-2836_2_389
 2005_579_0014-5793_4_877
 
	Citances for PMID: 7610039
 1995_23_0305-1048_12_2097
 1996_1307_0167-4781_1_31
 1996_21_0968-0004_3_102
 1996_271_0021-9258_39_24115
 1996_271_0021-9258_8_4349
 1996_6_0959-437X_2_208
 1996_6_0959-437X_2_208
 1996_8_0955-0674_6_815
 1996_8_0955-0674_6_815
 1996_93_0027-8424_22_12309
 1996_93_0027-8424_22_12309
 1997_11_0890-9369_24_3375
 1997_13_1081-0706__293
 1997_16_0261-4189_11_3320
 1997_16_0261-4189_11_3320
 1997_16_0261-4189_14_4340
 1997_16_0261-4189_14_4340
 1997_272_0021-9258_16_10928
 1997_272_0021-9258_39_24508
 1997_2_1356-9597_7_467
 1997_7_0959-437X_2_152
 1997_7_0959-437X_2_152
 1998_17_0261-4189_23_6963
 1998_17_0261-4189_23_6963
 1998_18_0270-7306_5_2758
 1998_217_0378-1119_1-2_177
 1998_238_0014-4827_1_63
 1998_245_0014-4827_2_282
 1998_273_0021-9258_14_8369
 1998_273_0021-9258_27_17095
 1999_18_1046-2023_3_407
 1999_19_0270-7306_12_8003
 1999_447_0014-5793_2-3_292
 1999_96_0027-8424_11_6193
 1999_96_0027-8424_11_6193
 2000_19_0950-9232_44_5073
 2000_28_0305-1048_23_4769
 2000_28_0305-1048_23_4769
 2000_300_0022-2836_3_421
 2000_68_0019-9567_10_6069
 2000_69_0066-4154__829
 2001_153_0021-9525_7_1341
 2001_276_0021-9258_12_8884
 2002_277_0021-9258_4_2702
 2003_270_0014-2956_6_1089
 2003_278_0021-9258_7_4491
 2003_327_0022-2836_1_111
 2004_68_1092-2172_1_109
 
	Citances for PMID: 9038340
 1997_11_0890-9369_21_2767
 1997_11_0890-9369_24_3375
 1997_13_1081-0706__293
 1997_272_0021-9258_42_26413
 1997_272_0021-9258_45_28247
 1997_88_0092-8674_4_493
 1997_91_0092-8674_1_59
 1997_91_0092-8674_6_717
 1997_94_0027-8424_20_10786
 1997_94_0027-8424_20_10786
 1998_10_0955-0674_3_304
 1998_10_0955-0674_3_304
 1998_1398_0167-4781_2_113
 1998_17_0261-4189_18_5509
 1998_17_0261-4189_18_5509
 1998_273_0021-9258_38_24543
 1998_273_0021-9258_42_27137
 1998_273_0021-9258_49_32421
 1998_2_1097-2765_1_23
 1998_3_1356-9597_11_737
 1998_8_0959-437X_2_194
 1998_8_0959-437X_2_194
 1998_92_0092-8674_3_295
 1999_10_1059-1524_8_2631
 1999_13_0890-9369_10_1289
 1999_13_0890-9369_20_2639
 1999_151_0016-6731_4_1445
 1999_18_0261-4189_21_6169
 1999_18_0261-4189_21_6169
 1999_18_0261-4189_2_396
 1999_18_0261-4189_2_396
 1999_18_0261-4189_5_1415
 1999_18_0261-4189_5_1415
 1999_18_0261-4189_9_2435
 1999_18_0261-4189_9_2435
 1999_248_0014-4827_1_58
 1999_274_0021-9258_12_8291
 1999_3_1097-2765_4_477
 1999_96_0027-8424_22_12367
 1999_96_0027-8424_22_12367
 1999_96_0027-8424_2_441
 1999_96_0027-8424_2_441
 2000_10_0960-9822_24_1547
 2000_12_0955-0674_3_280
 2000_12_0955-0674_3_280
 2000_14_0890-9369_13_1631
 2000_19_0261-4189_17_4774
 2000_19_0261-4189_17_4774
 2000_245_0378-1119_1_13
 2000_275_0021-9258_24_18011
 2000_275_0021-9258_45_35233
 2000_275_0021-9258_5_3522
 2000_5_1097-2765_4_617
 2000_69_0066-4154__829
 2000_6_1097-2765_3_637
 2000_97_0027-8424_26_14115
 2000_97_0027-8424_26_14115
 2001_11_0960-9822_18_1427
 2001_20_0261-4189_17_4901
 2001_20_0261-4189_17_4901
 2001_21_0270-7306_14_4460
 2001_21_0270-7306_8_2790
 2001_279_0378-1119_1_1
 2001_314_0022-2836_3_387
 2001_6_1356-9597_10_837
 2001_98_0027-8424_15_8361
 2001_98_0027-8424_15_8361
 2001_98_0027-8424_21_11997
 2001_98_0027-8424_21_11997
 2001_98_0027-8424_24_13589
 2001_98_0027-8424_24_13589
 2001_98_0027-8424_9_4938
 2001_98_0027-8424_9_4938
 2002_140_1047-8477_1-3_17
 2002_160_0016-6731_4_1305
 2002_16_0890-9369_6_659
 2002_21_0261-4189_12_3148
 2002_21_0261-4189_12_3148
 2002_277_0021-9258_18_16033
 2002_277_0021-9258_19_16920
 2002_30_0305-1048_14_3192
 2002_30_0305-1048_14_3192
 2002_3_1471-0072_11_826
 2002_71_0066-4154__333
 2003_17_0890-9369_14_1741
 2003_17_0890-9369_15_1894
 2003_22_0261-4189_13_3441
 2003_22_0261-4189_13_3441
 2003_26_0168-6445_5_533
 2003_278_0021-9258_20_18606
 2003_278_0021-9258_47_46440
 2003_278_0021-9258_49_48524
 2003_310_0378-1119__1
 2003_31_0305-1048_2_619
 2003_31_0305-1048_2_619
 2003_52_1383-5769_1_41
 2004_1677_0167-4781_1-3_142
 2004_16_1097-2765_6_967
 2004_18_0890-9369_9_981
 2004_279_0021-9258_35_36354
 2004_279_0021-9258_9_8469
 2004_340_0022-2836_1_29
 2005_102_0027-8424_1_69
 2005_113_0009-5915_7_370
 2005_16_1084-9521_3_343
 2005_280_0021-9258_13_13071
 2005_44_0006-2960_21_7885
 
	Citances for PMID: 8631321
 1996_1307_0167-4781_1_31
 1996_271_0021-9258_39_24115
 1996_8_0955-0674_6_815
 1996_8_0955-0674_6_815
 1997_139_0021-9525_1_13
 1997_13_1081-0706__293
 1997_16_0261-4189_11_3312
 1997_16_0261-4189_11_3312
 1997_236_0006-291X_1_118
 1997_272_0021-9258_16_10928
 1997_272_0021-9258_39_24508
 1997_2_1356-9597_7_467
 1998_1398_0167-4781_2_113
 1998_18_0270-7306_5_2748
 1998_238_0014-4827_2_415
 1998_241_0014-4827_1_260
 1998_26_0305-1048_17_3955
 1998_26_0305-1048_17_3955
 1998_273_0021-9258_14_8369
 1998_273_0021-9258_27_17095
 1998_273_0021-9258_38_24543
 1998_273_0021-9258_51_34302
 1999_10_1059-1524_12_4043
 1999_68_0066-4154__649
 2000_20_0270-7306_22_8602
 2000_275_0021-9258_20_15049
 2000_69_0066-4154__829
 2001_114_0021-9533_11_2027
 2002_162_0168-9452_1_97
 2002_277_0021-9258_4_2702
 2002_3_1471-0072_11_826
 2003_278_0021-9258_7_4491
 2003_327_0022-2836_1_111
 2003_8_1356-9597_2_145
 2004_117_0021-9533_21_4909
 2004_340_0022-2836_5_1197
 2004_68_1092-2172_1_109
 
	Citances for PMID: 9658174
 1998_26_0305-1048_17_3955
 1998_26_0305-1048_17_3955
 1998_9_1059-1524_7_1833
 1999_10_1059-1524_12_4043
 1999_152_0016-6731_3_839
 1999_19_0270-7306_12_8003
 1999_96_0027-8424_26_14783
 1999_96_0027-8424_26_14783
 1999_96_0027-8424_6_2800
 1999_96_0027-8424_6_2800
 1999_96_0092-8674_3_415
 2000_20_0270-7306_10_3667
 2000_20_0270-7306_21_7922
 2000_275_0021-9258_25_18871
 2000_275_0021-9258_4_2491
 2000_300_0022-2836_3_421
 2000_69_0066-4154__829
 2001_12_1059-1524_5_1257
 2001_159_0016-6731_2_471
 2001_276_0021-9258_28_26189
 2001_276_0021-9258_46_42744
 2001_98_0027-8424_6_3034
 2001_98_0027-8424_6_3034
 2002_160_0016-6731_4_1305
 2003_327_0022-2836_1_111
 2003_44_0172-8083_1_38
 2003_8_1356-9597_5_413
 2004_113_0009-5915_3_145
 2004_15_1059-1524_8_3740
 2004_340_0022-2836_5_1197
 2004_68_1092-2172_1_109
 2005_280_0021-9258_8_6285
 
	Citances for PMID: 7601140
 1995_5_0960-9822_11_1270
 1996_21_0968-0004_3_102
 1996_271_0021-9258_39_24115
 1996_271_0021-9258_8_4349
 1996_8_0955-0674_6_815
 1996_8_0955-0674_6_815
 1996_93_0027-8424_19_10189
 1996_93_0027-8424_19_10189
 1997_13_1081-0706__293
 1997_16_0261-4189_11_3312
 1997_16_0261-4189_11_3312
 1997_16_0261-4189_11_3320
 1997_16_0261-4189_11_3320
 1997_236_0006-291X_1_118
 1997_272_0021-9258_16_10928
 1997_272_0021-9258_39_24508
 1997_2_1356-9597_7_467
 1997_7_0959-437X_2_152
 1997_7_0959-437X_2_152
 1998_1398_0167-4781_2_113
 1998_17_0261-4189_23_6963
 1998_17_0261-4189_23_6963
 1998_238_0014-4827_1_63
 1998_238_0014-4827_2_415
 1998_241_0014-4827_1_260
 1998_245_0014-4827_2_282
 1998_26_0305-1048_17_3955
 1998_26_0305-1048_17_3955
 1998_273_0021-9258_13_7320
 1998_273_0021-9258_14_8369
 1998_273_0021-9258_27_17095
 1998_273_0021-9258_38_24543
 1998_3_1356-9597_3_157
 1998_9_1059-1524_7_1833
 1999_18_1046-2023_3_329
 1999_19_0270-7306_12_8003
 1999_227_0378-1119_2_149
 1999_264_0014-2956_2_415
 1999_68_0066-4154__649
 2000_275_0021-9258_21_16235
 2000_275_0021-9258_4_2491
 2000_300_0022-2836_3_421
 2000_69_0066-4154__829
 2003_116_0021-9533_19_3971
 2003_278_0021-9258_38_36051
 2003_278_0021-9258_7_4491
 2003_31_0305-1048_2_570
 2003_31_0305-1048_2_570
 2003_8_1356-9597_2_145
 2004_279_0021-9258_10_9625
 2004_340_0022-2836_5_1197
 2004_68_1092-2172_1_109
 
	Citances for PMID: 8798650
 1996_271_0021-9258_39_24115
 1997_272_0021-9258_16_10928
 1997_272_0021-9258_39_24508
 1997_7_0959-437X_2_152
 1997_7_0959-437X_2_152
 1998_10_0955-0674_3_304
 1998_10_0955-0674_3_304
 1998_1398_0167-4781_2_113
 1998_17_0261-4189_23_6963
 1998_17_0261-4189_23_6963
 1998_245_0014-4827_2_282
 1998_26_0305-1048_17_3955
 1998_26_0305-1048_17_3955
 1998_273_0021-9258_13_7320
 1998_273_0021-9258_14_8369
 1998_273_0021-9258_38_24543
 1998_3_1356-9597_3_157
 1998_9_1059-1524_7_1833
 1999_10_1059-1524_12_4043
 1999_19_0270-7306_12_8003
 1999_19_0270-7306_9_6154
 1999_96_0027-8424_26_14783
 1999_96_0027-8424_26_14783
 2000_275_0021-9258_12_8426
 2000_275_0021-9258_25_18871
 2000_28_0305-1048_2_472
 2000_28_0305-1048_2_472
 2000_300_0022-2836_3_421
 2000_69_0066-4154__829
 2000_97_0027-8424_4_1530
 2000_97_0027-8424_4_1530
 2001_276_0021-9258_46_42744
 2001_276_0021-9258_52_49371
 2001_7_1097-2765_1_21
 2001_98_0027-8424_1_54
 2001_98_0027-8424_1_54
 2001_98_0027-8424_6_3034
 2001_98_0027-8424_6_3034
 2002_10_1097-2765_5_1223
 2002_162_0016-6731_3_1117
 2002_269_0014-2956_21_5192
 2002_277_0021-9258_14_12118
 2002_277_0021-9258_45_42471
 2002_71_0066-4154__333
 2003_1623_0304-4165_2-3_135
 2003_278_0021-9258_30_27372
 2003_303_0006-291X_1_8
 2003_305_0006-291X_2_412
 2003_327_0022-2836_1_111
 2004_117_0021-9533_21_4909
 2004_14_0959-437X_1_17
 2004_14_0959-437X_1_17
 2004_24_0270-7306_21_9568
 2004_340_0022-2836_5_1197
 2004_68_1092-2172_1_109
 2005_22_0749-503X_7_537
 2005_280_0021-9258_8_6285
 
	Citances for PMID: 8901561
 1996_93_0027-8424_22_12223
 1996_93_0027-8424_22_12223
 1997_11_0890-9369_21_2767
 1997_11_0890-9369_24_3365
 1997_139_0021-9525_1_13
 1997_13_1081-0706__293
 1997_272_0021-9258_39_24508
 1997_272_0021-9258_52_33384
 1997_90_0092-8674_4_649
 1997_94_0027-8424_7_3151
 1997_94_0027-8424_7_3151
 1997_9_0955-0674_3_358
 1997_9_0955-0674_3_358
 1998_10_0955-0674_6_742
 1998_10_0955-0674_6_742
 1998_1398_0167-4781_2_113
 1998_140_0021-9525_2_271
 1998_17_0261-4189_24_7219
 1998_17_0261-4189_24_7219
 1998_1_1097-2765_4_519
 1998_217_0378-1119_1-2_177
 1998_245_0014-4827_2_282
 1998_273_0021-9258_27_17095
 1998_8_0960-9822_6_347
 1999_152_0016-6731_3_839
 1999_18_0261-4189_19_5334
 1999_18_0261-4189_19_5334
 1999_18_0950-9232_50_7070
 1999_248_0014-4827_1_58
 1999_264_0014-2956_2_415
 1999_274_0021-9258_36_25927
 1999_68_0066-4154__649
 2000_129_1047-8477_2-3_198
 2000_19_0950-9232_17_2165
 2000_20_0270-7306_10_3667
 2000_275_0021-9258_12_8426
 2000_275_0021-9258_20_15049
 2000_275_0021-9258_21_16235
 2000_275_0021-9258_25_18871
 2000_275_0021-9258_37_29042
 2000_275_0021-9258_6_4239
 2000_275_0021-9258_9_6337
 2000_69_0066-4154__829
 2000_6_1097-2765_3_649
 2001_114_0021-9533_8_1447
 2001_12_1059-1524_5_1257
 2001_276_0021-9258_37_34428
 2001_276_0021-9258_48_44905
 2001_31_0020-7519_11_1246
 2001_98_0027-8424_1_54
 2001_98_0027-8424_1_54
 2002_111_0092-8674_3_419
 2002_115_0021-9533_14_2829
 2002_160_0016-6731_4_1305
 2002_190_0021-9541_3_287
 2002_277_0021-9258_4_2702
 2002_71_0066-4154__333
 2003_100_0027-8424_23_13241
 2003_100_0027-8424_23_13241
 2003_17_0890-9369_14_1789
 2003_22_0261-4189_3_704
 2003_22_0261-4189_3_704
 2003_278_0021-9258_27_24644
 2003_42_1433-7851_19_2122
 2003_77_0022-538X_4_2369
 2003_77_0022-538X_4_2369
 2003_8_1356-9597_2_145
 2004_146_1047-8477_1-2_234
 2004_165_0021-9525_6_789
 2004_295_0014-4827_1_138
 2004_68_1092-2172_1_109
 2004_78_0022-538X_24_13954
 2004_78_0022-538X_24_13954
 2004_99_0002-9270_2_218
 2005_10_1356-9597_1_63
 2005_24_0950-9232_17_2827
 2005_280_0021-9258_13_13071
 2005_280_0021-9258_8_6253
 
	Citances for PMID: 7790346
 1995_129_0021-9525_6_1433
 1995_5_0960-9822_11_1270
 1995_5_0960-9822_9_1009
 1996_21_0968-0004_3_102
 1996_271_0021-9258_39_24115
 1996_271_0021-9258_8_4349
 1996_6_0959-437X_2_208
 1996_6_0959-437X_2_208
 1996_6_0960-9822_11_1416
 1996_6_0962-8924_5_184
 1996_8_0955-0674_6_815
 1996_8_0955-0674_6_815
 1996_93_0027-8424_15_7562
 1996_93_0027-8424_15_7562
 1996_93_0027-8424_19_10189
 1996_93_0027-8424_19_10189
 1996_93_0027-8424_22_12309
 1996_93_0027-8424_22_12309
 1997_11_0890-9369_24_3365
 1997_11_0890-9369_24_3375
 1997_136_0021-9525_1_125
 1997_137_0021-9525_1_183
 1997_139_0021-9525_1_13
 1997_13_1081-0706__293
 1997_16_0261-4189_11_3312
 1997_16_0261-4189_11_3312
 1997_16_0261-4189_11_3320
 1997_16_0261-4189_11_3320
 1997_16_0261-4189_14_4340
 1997_16_0261-4189_14_4340
 1997_236_0006-291X_1_118
 1997_272_0021-9258_16_10928
 1997_272_0021-9258_39_24508
 1997_272_0021-9258_52_33384
 1997_2_1356-9597_7_467
 1997_7_0959-437X_2_152
 1997_7_0959-437X_2_152
 1997_90_0092-8674_4_649
 1997_91_0092-8674_1_59
 1998_1398_0167-4781_2_113
 1998_140_0021-9525_2_271
 1998_140_0021-9525_3_451
 1998_143_0021-9525_3_563
 1998_17_0261-4189_23_6963
 1998_17_0261-4189_23_6963
 1998_17_0261-4189_24_7219
 1998_17_0261-4189_24_7219
 1998_18_0270-7306_3_1562
 1998_18_0270-7306_5_2758
 1998_238_0014-4827_1_63
 1998_238_0014-4827_2_415
 1998_245_0014-4827_2_282
 1998_249_0006-291X_1_258
 1998_273_0021-9258_13_7320
 1998_273_0021-9258_14_8369
 1998_273_0021-9258_24_15279
 1998_273_0021-9258_27_17095
 1998_273_0021-9258_34_22083
 1998_273_0021-9258_36_23248
 1998_273_0021-9258_38_24543
 1998_3_1356-9597_3_157
 1998_95_0027-8424_25_14932
 1998_95_0027-8424_25_14932
 1999_10_1059-1524_2_259
 1999_146_0021-9525_4_709
 1999_18_0261-4189_19_5334
 1999_18_0261-4189_19_5334
 1999_18_0261-4189_20_5703
 1999_18_0261-4189_20_5703
 1999_18_1046-2023_3_407
 1999_19_0270-7306_10_7228
 1999_19_0270-7306_9_6154
 1999_264_0014-2956_2_415
 1999_274_0021-9258_36_25927
 1999_447_0014-5793_2-3_292
 1999_68_0066-4154__649
 1999_96_0027-8424_11_6193
 1999_96_0027-8424_11_6193
 2000_113_0021-9533_11_1929
 2000_129_1047-8477_2-3_198
 2000_19_0261-4189_11_2728
 2000_19_0261-4189_11_2728
 2000_19_0261-4189_7_1681
 2000_19_0261-4189_7_1681
 2000_20_0270-7306_22_8602
 2000_275_0021-9258_20_15049
 2000_275_0021-9258_21_16235
 2000_275_0021-9258_4_2491
 2000_275_0021-9258_8_5904
 2000_69_0066-4154__829
 2001_11_0959-437X_1_64
 2001_11_0959-437X_1_64
 2001_12_1059-1524_5_1257
 2001_21_0270-7306_12_4032
 2001_21_0270-7306_7_2581
 2001_276_0021-9258_46_42744
 2001_276_0021-9258_51_48526
 2001_276_0021-9258_9_6337
 2001_98_0027-8424_18_10085
 2001_98_0027-8424_18_10085
 2002_115_0021-9533_1_51
 2002_115_0021-9533_21_4037
 2002_21_0950-9232_43_6624
 2002_22_0270-7306_1_105
 2002_269_0014-2956_21_5192
 2002_277_0021-9258_36_33049
 2002_277_0021-9258_4_2702
 2002_30_0305-1048_19_4176
 2002_30_0305-1048_19_4176
 2002_419_0028-0836_6908_722
 2002_99_0027-8424_3_1347
 2002_99_0027-8424_3_1347
 2003_278_0021-9258_30_27372
 2003_31_0305-1048_2_570
 2003_31_0305-1048_2_570
 2003_423_0028-0836_6942_885
 2003_4_1469-221X_1_42
 2003_4_1469-221X_1_42
 2003_553_0014-5793_1-2_213
 2003_8_1356-9597_2_145
 2004_101_0027-8424_27_10078
 2004_101_0027-8424_27_10078
 2004_165_0021-9525_6_789
 2004_23_0950-9232_1_58
 2004_24_0270-7306_4_1614
 2004_295_0014-4827_1_138
 2004_324_0006-291X_2_554
 2004_68_1092-2172_1_109
 2005_105_0006-4971_5_2180
 2005_120_0092-8674_3_315
 2005_16_1059-1524_3_1527
 
	Citances for PMID: 11346650
 2001_276_0021-9258_29_26947
 2002_12_0962-8924_2_72
 2002_140_1047-8477_1-3_17
 2002_22_0270-7306_7_2242
 2002_41_0006-2960_52_15625
 2002_71_0066-4154__333
 2003_113_0092-8674_1_115
 2003_11_1097-2765_4_997
 2003_14_1059-1524_10_4250
 2003_226_0378-1097_2_285
 2003_306_0006-291X_4_851
 2003_310_0378-1119__1
 2003_334_0022-2836_3_585
 2003_77_0022-538X_4_2369
 2003_77_0022-538X_4_2369
 2004_131_0950-1991_19_4807
 2004_14_0960-9822_18_R778
 2004_24_0270-7306_4_1614
 2004_75_0006-3525_5_420
 2005_24_0950-9232_17_2827
 2005_280_0021-9258_24_23416
 2005_569_0027-5107_1-2_111
 2005_72_0006-3363_1_188
 2005_72_0006-3363_1_188
 
	Citances for PMID: 10966477
 2000_10_0960-9822_24_1565
 2000_290_0036-8075_5500_2306
 2000_69_0066-4154__829
 2001_101_0009-2665_8_2511
 2001_11_0960-9822_4_R121
 2001_13_1040-4651_12_2671
 2001_159_0016-6731_2_471
 2001_183_0021-9193_18_5459
 2001_183_0021-9193_18_5459
 2001_20_0261-4189_16_4588
 2001_20_0261-4189_16_4588
 2001_21_0270-7306_15_4938
 2001_21_0270-7306_23_8095
 2001_276_0021-9258_20_17092
 2001_276_0021-9258_28_26666
 2001_276_0021-9258_31_29067
 2001_276_0021-9258_37_34428
 2001_276_0021-9258_41_38076
 2001_276_0021-9258_46_42744
 2001_294_0036-8075_5550_2301
 2001_294_0036-8075_5550_2357
 2001_29_0305-1048_23_4881
 2001_2_1471-0056_8_640
 2001_411_0028-0836_6841_1068
 2001_6_1356-9597_7_575
 2001_6_1356-9597_7_575
 2001_7_1097-2765_1_21
 2001_8_1097-2765_5_1093
 2001_98_0027-8424_15_8361
 2001_98_0027-8424_20_11152
 2001_98_0027-8424_21_11997
 2001_98_0027-8424_21_11997
 2001_98_0027-8424_23_13114
 2001_98_0027-8424_23_13114
 2001_98_0027-8424_24_13589
 2001_98_0027-8424_24_13589
 2002_109_0092-8674_7_835
 2002_115_0021-9533_14_2829
 2002_115_0021-9533_1_51
 2002_115_0021-9533_5_869
 2002_12_0960-9822_7_599
 2002_12_0960-9822_8_689
 2002_12_0962-8924_3_138
 2002_13_1059-1524_10_3662
 2002_13_1059-1524_2_435
 2002_13_1059-1524_2_607
 2002_13_1059-1524_4_1298
 2002_14_1040-8746_1_65
 2002_159_0021-9525_4_541
 2002_161_0002-9440_1_267
 2002_161_0016-6731_1_47
 2002_161_0016-6731_2_611
 2002_16_0890-9369_20_2639
 2002_18_0168-9525_8_413
 2002_21_0261-4189_10_2485
 2002_21_0261-4189_10_2485
 2002_21_0261-4189_12_3148
 2002_21_0261-4189_12_3148
 2002_21_0261-4189_6_1437
 2002_21_0261-4189_6_1437
 2002_22_0270-7306_10_3537
 2002_22_0270-7306_13_4477
 2002_22_0270-7306_1_105
 2002_22_0270-7306_21_7459
 2002_22_0270-7306_21_7712
 2002_269_0014-2956_3_1040
 2002_273_0014-4827_1_54
 2002_277_0021-9258_18_15881
 2002_277_0021-9258_19_16920
 2002_277_0021-9258_23_20541
 2002_277_0021-9258_2_1599
 2002_277_0021-9258_31_27668
 2002_277_0021-9258_35_31430
 2002_277_0021-9258_36_33049
 2002_277_0021-9258_43_40871
 2002_277_0021-9258_45_42471
 2002_277_0021-9258_46_44376
 2002_297_0006-291X_2_396
 2002_297_0036-8075_5583_1026
 2002_299_0006-291X_5_723
 2002_30_0305-1048_10_2114
 2002_30_0305-1048_10_2114
 2002_32_0020-7519_14_1683
 2002_3_1469-221X_8_780
 2002_415_0028-0836_6872_651
 2002_418_0028-0836_6897_548
 2002_419_0028-0836_6908_718
 2002_419_0028-0836_6908_722
 2002_41_0006-2960_52_15625
 2002_46_0950-382X_1_113
 2002_4_1465-7392_3_198
 2002_527_0014-5793_1-3_143
 2002_71_0066-4154__333
 2002_76_0022-538X_23_11785
 2002_76_0022-538X_23_11785
 2002_76_0022-538X_7_3350
 2002_76_0022-538X_7_3350
 2002_7_1356-9597_8_781
 2002_99_0027-8424_3_1347
 2002_99_0027-8424_3_1347
 2002_9_1097-2765_2_233
 2002_9_1097-2765_3_471
 2002_9_1097-2765_3_481
 2002_9_1097-2765_4_703
 2002_9_1097-2765_5_1067
 2003_114_0092-8674_4_398
 2003_116_0021-9533_19_3971
 2003_11_1097-2765_1_203
 2003_11_1097-2765_4_997
 2003_145_0165-4608_2_152
 2003_160_0021-9525_2_177
 2003_17_0890-9369_15_1894
 2003_19_0168-9525_8_439
 2003_19_1073-2322_2_138
 2003_22_0261-4189_16_4294
 2003_22_0261-4189_16_4294
 2003_22_0261-4189_22_6115
 2003_22_0261-4189_22_6115
 2003_23_0270-7306_3_804
 2003_270_0014-2956_19_3880
 2003_270_0014-2956_6_1089
 2003_278_0021-9258_27_24644
 2003_278_0021-9258_29_26750
 2003_278_0021-9258_33_30854
 2003_278_0021-9258_44_42737
 2003_278_0021-9258_51_50956
 2003_278_0021-9258_8_6093
 2003_2_1535-9778_1_115
 2003_305_0006-291X_2_412
 2003_31_0305-1048_6_1725
 2003_31_0305-1048_6_1725
 2003_327_0022-2836_1_111
 2003_38_0531-5565_11-12_1285
 2003_44_0172-8083_1_38
 2003_48_0950-382X_3_605
 2003_4_1469-221X_7_666
 2003_4_1469-221X_7_666
 2003_532_0027-5107_1-2_21
 2003_553_0014-5793_1-2_213
 2003_61_0306-9877_1_120
 2004_101_0027-8424_30_10845
 2004_101_0027-8424_47_16577
 2004_101_0027-8424_47_16577
 2004_113_0009-5915_3_145
 2004_116_0092-8674_2_221
 2004_117_0021-9533_17_3897
 2004_15_1059-1524_8_3740
 2004_15_1097-2765_2_245
 2004_165_0021-9525_4_473
 2004_165_0021-9525_6_789
 2004_16_1040-4651_1_99
 2004_16_1040-4651_9_2380
 2004_23_0261-4189_13_2651
 2004_24_0270-7306_12_5404
 2004_24_0270-7306_14_6324
 2004_24_0270-7306_16_7140
 2004_24_0270-7306_6_2277
 2004_24_0270-7306_8_3373
 2004_279_0021-9258_10_9625
 2004_279_0021-9258_34_35368
 2004_279_0021-9258_34_35879
 2004_324_0006-291X_2_554
 2004_432_0028-0836_7015_298
 2004_444_0945-6317_4_313
 2004_67_0006-2952_7_1373
 2004_67_0163-3864_3_510
 2004_68_1092-2172_1_109
 2004_6_1465-7392_7_648
 2004_8_1431-0651_5_385
 2005_102_0027-8424_1_69
 2005_16_1059-1524_3_1527
 2005_16_1084-9521_3_343
 2005_24_0950-9232_17_2827
 2005_25_0270-7306_4_1560
 2005_347_0022-2836_3_509
 2005_4_1535-9778_1_166
 2005_4_1535-9778_1_55
 2005_569_0027-5107_1-2_111
 2005_87_0300-9084_7_591
 2005_98_0013-8746_2_227
 
	Citances for PMID: 9554851
 1998_10_0955-0674_6_742
 1998_10_0955-0674_6_742
 1998_12_0890-9369_17_2698
 1998_17_0261-4189_17_5182
 1998_17_0261-4189_17_5182
 1998_17_0261-4189_19_5699
 1998_17_0261-4189_19_5699
 1998_18_0270-7306_10_6102
 1998_273_0021-9258_29_18205
 1998_280_0036-8075_5363_593
 1998_8_0960-9822_21_R771
 1998_95_0027-8424_25_14693
 1998_95_0027-8424_25_14693
 1998__0730-2312__8
 1999_10_1059-1524_10_3263
 1999_112_0021-9533_12_2011
 1999_13_0890-9369_10_1289
 1999_13_0890-9369_16_2159
 1999_13_0890-9369_20_2619
 1999_146_0021-9525_4_709
 1999_152_0016-6731_3_839
 1999_18_0261-4189_19_5334
 1999_18_0261-4189_19_5334
 1999_19_0270-7306_2_1226
 1999_264_0014-2956_2_415
 1999_3_1097-2765_4_477
 1999_4_1097-2765_1_11
 1999_68_0066-4154__649
 1999_96_0027-8424_11_6193
 1999_96_0027-8424_11_6193
 1999_96_0027-8424_12_6626
 1999_96_0027-8424_12_6626
 1999_96_0027-8424_16_9130
 1999_96_0027-8424_16_9130
 1999_96_0027-8424_20_11440
 1999_96_0027-8424_20_11440
 1999_96_0027-8424_26_14783
 1999_96_0027-8424_26_14783
 1999_96_0027-8424_2_441
 1999_96_0027-8424_2_441
 2000_10_0960-9822_24_1547
 2000_10_0960-9822_4_195
 2000_129_1047-8477_2-3_186
 2000_12_0955-0674_3_280
 2000_12_0955-0674_3_280
 2000_12_0955-0674_6_690
 2000_12_0955-0674_6_690
 2000_14_0890-9369_12_1528
 2000_14_0890-9369_8_913
 2000_19_0261-4189_17_4774
 2000_19_0261-4189_17_4774
 2000_19_0261-4189_9_2082
 2000_19_0261-4189_9_2082
 2000_1_1469-221X_4_319
 2000_1_1469-221X_4_319
 2000_20_0270-7306_10_3667
 2000_20_0270-7306_11_3795
 2000_20_0270-7306_13_4483
 2000_20_0270-7306_3_1021
 2000_20_0270-7306_9_3086
 2000_245_0378-1119_1_13
 2000_261_0014-4827_1_271
 2000_275_0021-9258_24_18011
 2000_275_0021-9258_25_18871
 2000_275_0021-9258_45_35051
 2000_275_0021-9258_50_39773
 2000_275_0021-9258_9_6337
 2000_28_0305-1048_20_3897
 2000_28_0305-1048_20_3897
 2000_28_0305-1048_23_4769
 2000_28_0305-1048_23_4769
 2000_4_1367-5931_5_581
 2000_5_1097-2765_4_617
 2000_5_1356-9597_12_975
 2000_5_1356-9597_6_439
 2000_69_0066-4154__829
 2000_6_1097-2765_3_649
 2000_97_0027-8424_6_2399
 2000_97_0027-8424_6_2399
 2001_101_0009-2665_8_2511
 2001_108_0925-4773_1-2_81
 2001_114_0021-9533_8_1447
 2001_11_0960-9822_2_88
 2001_159_0016-6731_1_17
 2001_20_0261-4189_8_2097
 2001_20_0261-4189_8_2097
 2001_21_0270-7306_14_4495
 2001_21_0270-7306_14_4598
 2001_265_1617-4615_6_1039
 2001_276_0021-9258_17_13902
 2001_276_0021-9258_28_26189
 2001_276_0021-9258_46_42744
 2001_276_0021-9258_48_44905
 2001_276_0021-9258_51_48526
 2001_276_0021-9258_52_49371
 2001_276_0021-9258_9_6337
 2001_294_0036-8075_5550_2301
 2001_490_0014-5793_3_117
 2001_98_0027-8424_1_54
 2001_98_0027-8424_1_54
 2001_98_0027-8424_20_11211
 2001_98_0027-8424_20_11211
 2001_98_0027-8424_9_4978
 2001_98_0027-8424_9_4978
 2002_109_0092-8674_7_849
 2002_10_1097-2765_5_1223
 2002_115_0021-9533_14_2829
 2002_13_1059-1524_2_607
 2002_13_1059-1524_5_1462
 2002_140_1047-8477_1-3_17
 2002_159_0021-9525_4_541
 2002_161_0016-6731_1_47
 2002_16_0890-9369_10_1182
 2002_21_0950-9232_51_7786
 2002_22_0270-7306_13_4477
 2002_243_0012-1606_1_34
 2002_277_0021-9258_14_12118
 2002_277_0021-9258_18_15881
 2002_277_0021-9258_18_16033
 2002_277_0021-9258_34_30824
 2002_277_0021-9258_36_33049
 2002_277_0021-9258_43_40520
 2002_415_0028-0836_6872_651
 2002_71_0066-4154__333
 2002_99_0027-8424_3_1347
 2002_99_0027-8424_3_1347
 2003_11_1097-2765_1_203
 2003_11_1097-2765_2_329
 2003_11_1097-2765_5_1323
 2003_12_1097-2765_5_1067
 2003_17_0890-9369_14_1755
 2003_22_0261-4189_10_2526
 2003_22_0261-4189_10_2526
 2003_26_0168-6445_5_533
 2003_270_0014-2956_19_3880
 2003_278_0021-9258_42_41083
 2003_303_0006-291X_1_251
 2003_31_0305-1048_6_1725
 2003_31_0305-1048_6_1725
 2003_327_0022-2836_1_111
 2003_462_0014-2999_1-3_15
 2003_8_1356-9597_2_145
 2004_113_0009-5915_3_145
 2004_117_0021-9533_25_6019
 2004_131_0950-1991_19_4807
 2004_15_1059-1524_5_2230
 2004_16_1040-4651_1_99
 2004_16_1097-2765_2_173
 2004_23_0261-4189_15_3122
 2004_23_0261-4189_18_3667
 2004_23_0950-9232_11_2050
 2004_24_0270-7306_17_7419
 2004_279_0021-9258_14_14245
 2004_279_0021-9258_19_19691
 2004_279_0021-9258_34_35879
 2004_305_0036-8075_5680_86
 2004_340_0022-2836_2_195
 2004_68_1092-2172_1_109
 2005_10_1356-9597_4_297
 2005_16_1059-1524_3_1527
 2005_24_0950-9232_17_2827
 2005_25_0270-7306_4_1560
 2005_25_0270-7306_9_3553
 2005_347_0022-2836_3_509
 
	Citances for PMID: 8901577
 1996_93_0027-8424_22_12309
 1996_93_0027-8424_22_12309
 1997_13_1081-0706__293
 1997_91_0092-8674_1_59
 
	Citances for PMID: 2044962
 1992_20_0305-1048_10_2403
 1992_20_0305-1048_21_5571
 1992_20_0305-1048_5_1069
 1992_69_0092-8674_1_151
 1992_89_0027-8424_21_10459
 1993_122_0021-9525_5_993
 1993_123_0021-9525_6_1635
 1993_21_0305-1048_11_2541
 1993_21_0305-1048_23_5289
 1993_74_0092-8674_2_371
 1993_90_0027-8424_16_7637
 1994_1217_0167-4781_3_239
 1994_22_0305-1048_25_5555
 1994_6_0955-0674_3_368
 1994_6_0955-0674_3_368
 1995_155_0378-1119_1_113
 1995_163_0378-1119_2_243
 1995_23_0305-1048_12_2097
 1995_23_0305-1048_17_3493
 1995_81_0092-8674_5_667
 1995_83_0092-8674_3_397
 1995_92_0027-8424_7_2514
 1995_92_0027-8424_7_2514
 1996_12_0168-9525_10_405
 1996_1307_0167-4781_1_31
 1996_21_0968-0004_3_102
 1996_271_0021-9258_39_24115
 1996_271_0021-9258_8_4349
 1996_85_0092-8674_1_39
 1996_93_0027-8424_14_7048
 1996_93_0027-8424_14_7048
 1996_93_0027-8424_22_12223
 1996_93_0027-8424_22_12223
 1996_93_0027-8424_22_12309
 1996_93_0027-8424_22_12309
 1997_11_0890-9369_24_3365
 1997_11_0890-9369_24_3375
 1997_137_0021-9525_1_183
 1997_139_0021-9525_1_13
 1997_139_0021-9525_2_449
 1997_13_1081-0706__293
 1997_187_0378-1119_2_239
 1997_272_0021-9258_16_10928
 1997_272_0021-9258_39_24508
 1997_283_0076-6879__440
 1997_91_0092-8674_1_59
 1997_94_0027-8424_11_5611
 1997_94_0027-8424_11_5611
 1997_94_0027-8424_23_12521
 1997_94_0027-8424_23_12521
 1997_94_0027-8424_26_14320
 1997_94_0027-8424_26_14320
 1997_94_0027-8424_7_3151
 1997_94_0027-8424_7_3151
 1998_10_0955-0674_6_742
 1998_10_0955-0674_6_742
 1998_12_0890-9369_18_2956
 1998_140_0021-9525_2_271
 1998_17_0261-4189_19_5699
 1998_17_0261-4189_19_5699
 1998_18_0270-7306_10_6102
 1998_18_0270-7306_8_4914
 1998_245_0014-4827_2_282
 1998_273_0021-9258_14_8369
 1998_273_0021-9258_27_17095
 1998_279_0036-8075_5357_1733
 1998_280_0036-8075_5363_593
 1998_9_1059-1524_8_2107
 1999_13_0890-9369_16_2159
 1999_151_0016-6731_4_1445
 1999_153_0016-6731_3_1171
 1999_18_0261-4189_2_396
 1999_18_0261-4189_2_396
 1999_18_1046-2023_3_329
 1999_19_0270-7306_12_8003
 1999_19_0270-7306_2_1038
 1999_19_0270-7306_7_4888
 1999_274_0021-9258_12_8291
 1999_274_0021-9258_36_25927
 1999_68_0066-4154__649
 1999_96_0027-8424_16_9130
 1999_96_0027-8424_16_9130
 2000_10_0960-9822_4_195
 2000_14_0890-9369_8_913
 2000_16_0749-503X_8_731
 2000_19_0261-4189_9_2082
 2000_19_0261-4189_9_2082
 2000_20_0270-7306_10_3459
 2000_20_0270-7306_8_2809
 2000_20_0270-7306_9_3086
 2000_275_0021-9258_20_15049
 2000_275_0021-9258_25_18871
 2000_28_0305-1048_20_3897
 2000_28_0305-1048_20_3897
 2000_300_0022-2836_3_421
 2000_5_1356-9597_6_439
 2000_69_0066-4154__829
 2000_6_1097-2765_3_637
 2001_114_0021-9533_8_1447
 2001_159_0016-6731_1_17
 2001_20_0261-4189_13_3544
 2001_20_0261-4189_13_3544
 2001_21_0270-7306_14_4598
 2001_21_0270-7306_21_7150
 2001_276_0021-9258_18_15397
 2001_2_1471-0056_9_659
 2001_8_1097-2765_5_1093
 2002_109_0092-8674_7_849
 2002_162_0016-6731_3_1117
 2002_190_0021-9541_3_287
 2002_277_0021-9258_18_16033
 2002_277_0021-9258_43_40520
 2002_277_0021-9258_44_41706
 2002_297_0036-8075_5581_602
 2002_41_0172-8083_6_389
 2003_22_0261-4189_8_1939
 2003_22_0261-4189_8_1939
 2003_278_0021-9258_30_27372
 2003_2_1568-7864_3_315
 2003_31_0305-1048_2_570
 2003_31_0305-1048_2_570
 2004_15_1059-1524_8_3740
 2004_23_0261-4189_5_1188
 2004_279_0021-9258_9_8469
 2004_68_1092-2172_1_109
 2005_120_0092-8674_3_315
 2005_19_0890-9369_11_1365
 2005_347_0022-2836_3_509
 2005_55_0950-382X_6_1735
 
	Citances for PMID: 9755170
 1998_17_0261-4189_19_5699
 1998_17_0261-4189_19_5699
 1999_112_0021-9533_12_2011
 1999_19_0270-7306_11_7886
 1999_19_0270-7306_2_1226
 1999_265_0014-2956_3_936
 1999_3_1097-2765_4_477
 1999_68_0066-4154__649
 1999_96_0027-8424_16_9130
 1999_96_0027-8424_16_9130
 1999_96_0027-8424_20_11440
 1999_96_0027-8424_20_11440
 2000_129_1047-8477_2-3_186
 2000_12_0955-0674_6_690
 2000_12_0955-0674_6_690
 2000_14_0890-9369_12_1528
 2000_19_0261-4189_9_2082
 2000_19_0261-4189_9_2082
 2000_20_0270-7306_10_3667
 2000_20_0270-7306_11_3795
 2000_20_0270-7306_8_2809
 2000_20_0270-7306_9_3086
 2000_245_0378-1119_1_13
 2000_275_0021-9258_21_16235
 2000_275_0021-9258_50_39773
 2000_275_0021-9258_9_6337
 2000_289_0036-8075_5487_2133
 2000_28_0305-1048_20_3897
 2000_28_0305-1048_20_3897
 2000_28_0305-1048_23_4769
 2000_28_0305-1048_23_4769
 2000_466_0014-5793_2-3_287
 2000_5_1097-2765_4_617
 2000_5_1356-9597_12_975
 2000_5_1356-9597_6_439
 2000_69_0066-4154__829
 2000_6_1097-2765_3_649
 2001_114_0021-9533_8_1447
 2001_20_0261-4189_13_3293
 2001_20_0261-4189_13_3293
 2001_20_0261-4189_8_2097
 2001_20_0261-4189_8_2097
 2001_21_0270-7306_14_4598
 2001_21_0270-7306_7_2581
 2001_265_1617-4615_6_1039
 2001_276_0021-9258_28_26189
 2001_276_0021-9258_46_42744
 2001_276_0021-9258_51_48526
 2001_276_0021-9258_9_6337
 2001_3_1465-7392_8_715
 2001_52_0022-0957_355_193
 2001_61_0008-5472_16_6170
 2001_8_1097-2765_5_1093
 2001_98_0027-8424_20_11211
 2001_98_0027-8424_20_11211
 2001_98_0027-8424_9_4978
 2001_98_0027-8424_9_4978
 2002_13_1059-1524_2_607
 2002_13_1059-1524_5_1462
 2002_140_1047-8477_1-3_17
 2002_159_0021-9525_4_541
 2002_161_0016-6731_1_47
 2002_16_0890-9369_10_1182
 2002_183_0041-008X_2_117
 2002_20_0736-5748_3-5_407
 2002_21_0950-9232_51_7786
 2002_22_0270-7306_16_5669
 2002_277_0021-9258_36_33049
 2002_277_0021-9258_43_40520
 2002_419_0028-0836_6908_722
 2002_71_0066-4154__333
 2003_11_1097-2765_1_203
 2003_11_1097-2765_2_329
 2003_14_1059-1524_9_3876
 2003_17_0890-9369_9_1141
 2003_22_0261-4189_10_2526
 2003_22_0261-4189_10_2526
 2003_278_0021-9258_42_41083
 2003_278_0021-9258_46_45507
 2003_288_0014-4827_2_225
 2003_305_0006-291X_2_412
 2003_31_0305-1048_6_1725
 2003_31_0305-1048_6_1725
 2003_327_0022-2836_1_111
 2003_38_0531-5565_11-12_1285
 2003_462_0014-2999_1-3_15
 2003_8_1356-9597_2_145
 2003_8_1356-9597_5_465
 2004_101_0027-8424_30_10845
 2004_113_0009-5915_3_113
 2004_113_0009-5915_3_145
 2004_117_0021-9533_21_4909
 2004_117_0021-9533_25_6019
 2004_15_1059-1524_8_3740
 2004_16_1040-4651_1_99
 2004_16_1097-2765_2_173
 2004_22_0734-9750_8_621
 2004_23_0261-4189_18_3667
 2004_23_0950-9232_37_6250
 2004_24_0270-7306_14_6268
 2004_24_0270-7306_17_7419
 2004_24_0270-7306_4_1614
 2004_279_0021-9258_16_16144
 2004_279_0021-9258_19_19691
 2004_279_0021-9258_31_32569
 2004_279_0021-9258_7_6046
 2004_295_0014-4827_1_138
 2004_5_1567-133X_1_81
 2004_68_1092-2172_1_109
 2004_9_1356-9597_3_179
 2004_9_1356-9597_3_179
 2005_10_1356-9597_1_63
 2005_120_0092-8674_3_315
 2005_15_0960-9822_2_146
 2005_16_1059-1524_3_1527
 2005_16_1084-9521_3_311
 2005_19_0890-9369_1_114
 2005_24_0950-9232_17_2827
 2005_347_0022-2836_3_509
 2005_353_0378-1119_1_23
 
	Citances for PMID: 9472017
 1998_10_0955-0674_3_304
 1998_10_0955-0674_3_304
 1998_10_0955-0674_6_742
 1998_10_0955-0674_6_742
 1998_12_0890-9369_4_480
 1998_17_0261-4189_17_5182
 1998_17_0261-4189_17_5182
 1998_273_0021-9258_36_23248
 1998_8_0959-437X_2_185
 1998_8_0959-437X_2_185
 1998_8_0960-9822_21_R771
 1999_13_0890-9369_16_2159
 1999_13_0890-9369_18_2360
 1999_151_0016-6731_3_965
 1999_152_0016-6731_3_839
 1999_18_0261-4189_19_5334
 1999_18_0261-4189_19_5334
 1999_18_0261-4189_20_5703
 1999_18_0261-4189_20_5703
 1999_18_1046-2023_3_407
 1999_19_0270-7306_11_7428
 1999_19_0270-7306_2_1226
 1999_19_0270-7306_6_4270
 1999_19_0270-7306_7_4888
 1999_19_0270-7306_7_5083
 1999_19_0270-7306_8_5535
 1999_19_0270-7306_9_6098
 1999_3_1097-2765_4_477
 1999_4_1097-2765_6_983
 1999_96_0027-8424_15_8443
 1999_96_0027-8424_15_8443
 1999_96_0027-8424_16_9130
 1999_96_0027-8424_16_9130
 1999_96_0027-8424_6_2800
 1999_96_0027-8424_6_2800
 2000_113_0021-9533_12_2111
 2000_12_0955-0674_6_690
 2000_12_0955-0674_6_690
 2000_14_0890-9369_12_1528
 2000_19_0261-4189_9_2082
 2000_19_0261-4189_9_2082
 2000_1_1469-221X_4_319
 2000_1_1469-221X_4_319
 2000_20_0270-7306_10_3667
 2000_20_0270-7306_11_3795
 2000_20_0270-7306_1_242
 2000_20_0270-7306_21_7922
 2000_20_0270-7306_9_3086
 2000_275_0021-9258_24_18011
 2000_275_0021-9258_37_29042
 2000_275_0021-9258_45_35051
 2000_275_0021-9258_50_39773
 2000_275_0021-9258_9_6337
 2000_28_0305-1048_23_4769
 2000_28_0305-1048_23_4769
 2000_28_0305-1048_2_570
 2000_28_0305-1048_2_570
 2000_299_0022-2836_3_667
 2000_5_1097-2765_1_85
 2000_5_1356-9597_6_463
 2000_69_0066-4154__829
 2001_114_0021-9533_8_1447
 2001_12_1059-1524_11_3317
 2001_12_1059-1524_5_1257
 2001_152_0021-9525_2_385
 2001_159_0016-6731_1_35
 2001_21_0270-7306_17_5767
 2001_22_0143-3334_2_233
 2001_264_0378-1119_2_249
 2001_276_0021-9258_46_42744
 2001_294_0036-8075_5540_115
 2001_29_0305-1048_7_1433
 2001_29_0305-1048_7_1433
 2001_2_1469-221X_2_119
 2001_2_1469-221X_2_119
 2001_98_0027-8424_20_11211
 2001_98_0027-8424_20_11211
 2002_10_1097-2765_5_1223
 2002_115_0021-9533_7_1435
 2002_13_1059-1524_5_1462
 2002_14_0955-0674_3_377
 2002_14_0955-0674_3_377
 2002_161_0016-6731_1_47
 2002_16_0890-9369_10_1182
 2002_16_0890-9369_19_2485
 2002_190_0021-9541_3_287
 2002_1_1568-7864_3_175
 2002_21_0261-4189_12_3171
 2002_21_0261-4189_12_3171
 2002_21_0261-4189_9_2168
 2002_21_0261-4189_9_2168
 2002_21_0950-9232_51_7786
 2002_22_0270-7306_13_4477
 2002_22_0270-7306_1_309
 2002_22_0270-7306_23_8215
 2002_277_0021-9258_18_15881
 2002_277_0021-9258_31_27668
 2002_277_0021-9258_34_30824
 2002_283_0363-6143_4_C1009
 2002_4_1465-7392_3_198
 2002_71_0066-4154__333
 2002_80_0946-2716_8_463
 2002_99_0027-8424_25_16087
 2002_99_0027-8424_25_16087
 2002_99_0027-8424_3_1347
 2002_99_0027-8424_3_1347
 2003_116_0021-9533_19_3971
 2003_11_1097-2765_5_1323
 2003_278_0021-9258_42_41083
 2003_423_0028-0836_6941_720
 2003_44_0172-8083_1_38
 2003_532_0027-5107_1-2_21
 2003_532_0027-5107_1-2_29
 2003_532_0027-5107_1-2_5
 2003_8_1356-9597_5_451
 2004_117_0021-9533_25_6019
 2004_15_1059-1524_8_3740
 2004_18_0890-9369_9_981
 2004_23_0261-4189_15_3122
 2004_279_0021-9258_38_39636
 2004_324_0006-291X_2_554
 2005_10_1356-9597_4_297
 2005_24_0950-9232_17_2827
 
	Citances for PMID: 7954792
 1994_79_0092-8674_2_233
 1995_165_0378-1119_2_183
 1995_270_0021-9258_44_26209
 1995_270_0021-9258_50_29660
 1995_5_0960-9822_11_1257
 1995_7_0955-0674_6_773
 1995_7_0955-0674_6_773
 1995_7_0955-0674_6_790
 1995_7_0955-0674_6_790
 1995_83_0092-8674_6_1001
 1996_1242_0304-419X_3_185
 1996_1288_0304-419X_1_F21
 1996_1288_0304-419X_1_O1
 1996_12_0168-9525_10_405
 1996_12_0168-9525_9_345
 1996_12_1081-0706__663
 1996_183_0378-1119_1-2_159
 1996_21_0968-0004_11_445
 1996_21_0968-0004_3_96
 1996_271_0021-9258_10_5704
 1996_271_0021-9258_15_8661
 1996_271_0021-9258_26_15608
 1996_271_0021-9258_42_25790
 1996_271_0021-9258_42_25906
 1996_274_0036-8075_5293_1646
 1996_274_0036-8075_5293_1652
 1996_274_0036-8075_5293_1659
 1996_274_0036-8075_5293_1664
 1996_387_0014-5793_2-3_184
 1996_3_1074-5521_11_869
 1996_6_0959-437X_2_203
 1996_6_0959-437X_2_203
 1996_6_0959-437X_2_208
 1996_6_0959-437X_2_208
 1996_6_0960-9822_10_1209
 1996_6_0960-9822_2_189
 1996_6_0960-9822_3_229
 1996_6_0962-8924_2_62
 1996_84_0092-8674_1_73
 1996_84_0092-8674_5_687
 1996_84_0092-8674_5_699
 1996_84_0092-8674_6_853
 1996_86_0092-8674_2_263
 1996_86_0092-8674_3_453
 1996_8_0955-0674_6_815
 1996_8_0955-0674_6_815
 1996_93_0027-8424_15_7772
 1996_93_0027-8424_15_7772
 1996_93_0027-8424_2_861
 1996_93_0027-8424_2_861
 1996_93_0027-8424_9_4294
 1996_93_0027-8424_9_4294
 1997_113_0032-0889_3_841
 1997_11_0890-9369_22_3046
 1997_11_0890-9369_24_3375
 1997_11_0892-6638_13_1067
 1997_1351_0167-4781_1-2_231
 1997_13_1081-0706__261
 1997_13_1081-0706__293
 1997_16_0261-4189_10_2693
 1997_16_0261-4189_10_2693
 1997_16_0261-4189_15_4657
 1997_16_0261-4189_15_4657
 1997_16_0261-4189_17_5334
 1997_16_0261-4189_17_5334
 1997_16_0261-4189_18_5629
 1997_16_0261-4189_18_5629
 1997_16_0261-4189_19_5966
 1997_16_0261-4189_19_5966
 1997_16_0261-4189_19_5988
 1997_16_0261-4189_19_5988
 1997_16_0261-4189_23_7196
 1997_16_0261-4189_3_534
 1997_16_0261-4189_3_534
 1997_179_0021-9193_5_1541
 1997_232_0014-4827_1_72
 1997_236_0006-291X_1_40
 1997_272_0021-9258_11_7093
 1997_272_0021-9258_18_12100
 1997_272_0021-9258_6_3845
 1997_277_0036-8075_5332_1672
 1997_278_0036-8075_5337_455
 1997_29_1357-2725_4_559
 1997_30_0362-546X_3_1825
 1997_36_0006-2960_34_10526
 1997_51_0066-4227__125
 1997_7_0959-437X_1_7
 1997_7_0959-437X_1_7
 1997_7_0960-9822_7_488
 1997_7_0962-8924_3_95
 1997_88_0092-8674_1_109
 1997_90_0092-8674_3_415
 1997_90_0092-8674_4_649
 1997_90_0092-8674_4_671
 1997_91_0092-8674_2_149
 1997_91_0092-8674_2_209
 1997_91_0092-8674_2_221
 1997_91_0092-8674_4_491
 1997_94_0027-8424_11_5611
 1997_94_0027-8424_11_5611
 1997_94_0027-8424_12_6142
 1997_94_0027-8424_12_6142
 1997_94_0027-8424_23_12521
 1997_94_0027-8424_23_12521
 1997_94_0027-8424_6_2156
 1997_94_0027-8424_6_2156
 1997_9_0955-0674_3_358
 1997_9_0955-0674_3_358
 1997_9_0955-0674_6_788
 1997_9_0955-0674_6_788
 1998_10_0955-0674_6_759
 1998_10_0955-0674_6_759
 1998_12_0890-9369_16_2587
 1998_12_0890-9369_17_2698
 1998_12_0890-9369_4_480
 1998_12_0890-9369_5_692
 1998_12_0890-9369_7_901
 1998_12_0890-9369_7_914
 1998_1377_0304-419X_2_M61
 1998_1398_0167-4781_2_113
 1998_143_0021-9525_1_135
 1998_14_0168-9525_6_236
 1998_150_0016-6731_3_987
 1998_17_0261-4189_10_2961
 1998_17_0261-4189_14_4199
 1998_17_0261-4189_14_4199
 1998_17_0261-4189_17_5182
 1998_17_0261-4189_17_5182
 1998_17_0261-4189_18_5360
 1998_17_0261-4189_18_5360
 1998_17_0261-4189_18_5388
 1998_17_0261-4189_18_5388
 1998_17_0261-4189_19_5658
 1998_17_0261-4189_19_5658
 1998_17_0261-4189_1_269
 1998_17_0261-4189_22_6678
 1998_17_0261-4189_22_6678
 1998_17_0261-4189_2_368
 1998_17_0261-4189_2_482
 1998_17_0261-4189_2_498
 1998_17_0261-4189_5_1336
 1998_17_0261-4189_8_2208
 1998_18_0270-7306_1_433
 1998_18_0270-7306_5_2923
 1998_18_0270-7306_7_3681
 1998_1_1369-5274_6_636
 1998_200_0012-1606_2_182
 1998_273_0021-9258_29_18435
 1998_273_0021-9258_31_19443
 1998_273_0021-9258_38_24289
 1998_273_0021-9258_43_28107
 1998_273_0021-9258_52_34976
 1998_273_0021-9258_7_4040
 1998_279_0036-8075_5354_1216
 1998_279_0036-8075_5354_1219
 1998_280_0036-8075_5363_593
 1998_281_0022-2836_4_631
 1998_281_0036-8075_5384_1854
 1998_282_0036-8075_5395_1886
 1998_28_0950-382X_1_69
 1998_2_1097-2765_2_173
 1998_2_1097-2765_5_571
 1998_2_1097-2765_6_709
 1998_36_0981-9428_1-2_9
 1998_3_1356-9597_11_721
 1998_438_0014-5793_3_183
 1998_52_0066-4227__687
 1998_62_1092-2172_4_1191
 1998_62_1092-2172_4_1264
 1998_67_0066-4154__425
 1998_8_0959-437X_1_36
 1998_8_0959-437X_1_36
 1998_8_0960-9822_13_750
 1998_8_0960-9822_9_497
 1998_8_0962-8924_6_238
 1998_95_0027-8424_13_7451
 1998_95_0027-8424_13_7451
 1998_95_0027-8424_1_85
 1998_95_0027-8424_3_993
 1998_95_0027-8424_3_993
 1998_95_0027-8424_5_2384
 1998_95_0027-8424_5_2384
 1998_95_0027-8424_5_2417
 1998_95_0027-8424_5_2417
 1998_9_1059-1524_10_2803
 1998_9_1059-1524_1_63
 1998_9_1059-1524_6_1309
 1998_9_1059-1524_9_2393
 1999_10_1059-1524_10_3263
 1999_10_1059-1524_11_3689
 1999_13_0890-9369_12_1614
 1999_13_0890-9369_15_1950
 1999_13_0890-9369_16_2159
 1999_13_0890-9369_2_176
 1999_145_0021-9525_5_979
 1999_146_0021-9525_5_1019
 1999_151_0016-6731_2_459
 1999_153_0016-6731_4_1561
 1999_15_1081-0706__435
 1999_18_0261-4189_16_4485
 1999_18_0261-4189_16_4485
 1999_18_0261-4189_19_5334
 1999_18_0261-4189_19_5334
 1999_18_0261-4189_22_6561
 1999_18_0261-4189_22_6561
 1999_18_0261-4189_2_320
 1999_18_0261-4189_2_320
 1999_18_0261-4189_2_396
 1999_18_0261-4189_2_396
 1999_18_0950-9232_48_6758
 1999_19_0270-7306_1_635
 1999_19_0270-7306_1_817
 1999_19_0270-7306_2_1190
 1999_19_0270-7306_2_1369
 1999_19_0270-7306_3_1759
 1999_19_0270-7306_7_4888
 1999_19_0270-7306_8_5512
 1999_1_1465-7392_8_486
 1999_247_0014-4827_2_313
 1999_254_0006-291X_2_338
 1999_274_0021-9258_12_8291
 1999_274_0021-9258_13_9092
 1999_274_0021-9258_34_24220
 1999_284_0036-8075_5414_657
 1999_2_1369-5274_6_610
 1999_31_0950-382X_3_823
 1999_38_0006-2960_20_6471
 1999_4_1097-2765_1_11
 1999_4_1097-2765_1_21
 1999_4_1097-2765_3_353
 1999_72_0079-6107_3_299
 1999_91_0248-4900_4-5_291
 1999_96_0027-8424_16_9124
 1999_96_0027-8424_16_9124
 1999_96_0027-8424_6_2800
 1999_96_0027-8424_6_2800
 1999_96_0027-8424_6_2817
 1999_96_0027-8424_6_2817
 1999_9_0960-9822_20_R762
 1999_9_0960-9822_23_1392
 2000_10_0960-9822_4_195
 2000_10_0960-9822_5_231
 2000_113_0021-9533_12_2111
 2000_11_1059-1524_1_369
 2000_11_1059-1524_9_2845
 2000_129_1047-8477_2-3_159
 2000_148_0021-9525_3_441
 2000_149_0021-9525_7_1361
 2000_14_0890-9369_19_2526
 2000_154_0016-6731_4_1509
 2000_155_0016-6731_3_1033
 2000_16_0749-503X_10_905
 2000_19_0261-4189_20_5514
 2000_19_0261-4189_20_5514
 2000_19_0261-4189_22_6085
 2000_19_0261-4189_22_6085
 2000_19_0261-4189_23_6475
 2000_19_0261-4189_23_6475
 2000_1_1389-5729_3_201
 2000_20_0270-7306_11_3795
 2000_20_0270-7306_13_4483
 2000_20_0270-7306_13_4782
 2000_20_0270-7306_1_242
 2000_20_0270-7306_21_8220
 2000_20_0270-7306_2_542
 2000_267_0014-2956_2_434
 2000_275_0021-9258_13_9734
 2000_275_0021-9258_21_16235
 2000_275_0021-9258_24_18011
 2000_275_0021-9258_49_38929
 2000_71_1096-7192_1-2_261
 2001_101_0009-2665_8_2511
 2001_107_0092-8674_6_689
 2001_107_0092-8674_7_819
 2001_10_0960-7404_1-2_43
 2001_114_0021-9533_24_4599
 2001_11_0960-9822_2_88
 2001_12_1044-9523_8_427
 2001_1536_0925-4439_1_1
 2001_154_0021-9525_1_85
 2001_154_0021-9525_4_707
 2001_157_0016-6731_4_1437
 2001_159_0016-6731_1_17
 2001_159_0016-6731_4_1547
 2001_15_0890-9369_9_1078
 2001_187_0021-9541_1_1
 2001_20_0261-4189_17_4836
 2001_20_0261-4189_17_4836
 2001_21_0270-7306_13_4140
 2001_266_1617-4615_1_115
 2001_267_0378-1119_1_95
 2001_276_0021-9258_44_41049
 2001_3_1465-7392_8_715
 2001_411_0028-0836_6841_1068
 2001_414_0028-0836_6863_498
 2001_414_0028-0836_6863_514
 2001_490_0014-5793_3_179
 2001_83_0300-9084_3-4_333
 2001_8_1097-2765_2_439
 2001_98_0027-8424_20_11211
 2001_98_0027-8424_20_11211
 2001_98_0027-8424_23_13066
 2001_98_0027-8424_23_13066
 2002_10_1097-2765_5_1223
 2002_12_0960-9822_8_689
 2002_12_0962-8924_3_104
 2002_13_1059-1524_1_52
 2002_13_1059-1524_6_1916
 2002_14_0955-0674_6_676
 2002_14_0955-0674_6_676
 2002_157_0021-9525_3_367
 2002_160_0016-6731_1_123
 2002_161_0016-6731_1_47
 2002_16_0890-9369_10_1182
 2002_16_0890-9369_17_2179
 2002_16_0890-9369_23_3017
 2002_21_0261-4189_18_4851
 2002_21_0261-4189_18_4851
 2002_21_0950-9232_25_3978
 2002_22_0270-7306_20_7024
 2002_295_0036-8075_5558_1294
 2002_298_0036-8075_5593_611
 2002_351_0076-6879__279
 2002_415_0028-0836_6872_651
 2002_418_0028-0836_6897_556
 2002_513_0014-5793_1_2
 2002_82_0031-9333_2_373
 2002_9_1097-2765_5_1067
 2003_112_0092-8674_2_243
 2003_114_0092-8674_5_611
 2003_13_0960-9822_19_1669
 2003_17_0890-9369_18_2259
 2003_23_0270-7306_15_5388
 2003_23_0270-7306_23_8718
 2003_278_0021-9258_11_9671
 2003_278_0021-9258_25_22284
 2003_278_0021-9258_9_6687
 2003_288_0014-4827_2_225
 2003_2_1535-9778_1_123
 2003_300_0036-8075_5621_987
 2003_31_0305-1048_14_4071
 2003_31_0305-1048_14_4071
 2003_36_0960-7412_6_853
 2003_425_0028-0836_6959_737
 2003_44_0172-8083_1_8
 2003_4_1471-0072_11_855
 2003_4_1534-5807_5_741
 2003_532_0027-5107_1-2_5
 2003_5_1465-7392_12_1090
 2003_8_1356-9597_11_857
 2004_101_0027-8424_13_4465
 2004_101_0027-8424_13_4465
 2004_117_0021-9533_4_545
 2004_117_0092-8674_7_899
 2004_121_0925-4773_12_1495
 2004_131_0950-1991_15_3527
 2004_14_1097-2765_6_699
 2004_15_1059-1524_8_3796
 2004_15_1059-1524_8_3841
 2004_164_0021-9525_2_207
 2004_164_0021-9525_2_219
 2004_167_0021-9525_3_433
 2004_168_0016-6731_1_129
 2004_1695_0167-4889_1-3_133
 2004_16_1040-4651_1_5
 2004_18_0890-9369_14_1709
 2004_18_0890-9369_22_2699
 2004_18_0890-9369_9_981
 2004_24_0270-7306_24_10802
 2004_24_0270-7306_6_2487
 2004_279_0021-9258_14_14245
 2004_279_0021-9258_41_43019
 2004_33_1056-8700__225
 2004_38_0066-4197__203
 2004_46_0172-8083_1_1
 2004_51_0950-382X_2_447
 2004_54_0887-3585_3_455
 2004_6_1465-7392_10_997
 2004_6_1465-7392_8_777
 2004_73_0301-0082_5_311
 2005_169_0016-6731_3_1329
 2005_16_1059-1524_6_2772
 2005_24_0261-4189_7_1440
 2005_24_0950-9232_17_2756
 2005_24_0950-9232_2_217
 2005_25_0270-7306_10_3875
 2005_25_0270-7306_15_6707
 2005_25_0270-7306_1_440
 2005_273_1617-4615_5_361
 2005_6_1471-0072_1_9
 
	Citances for PMID: 8574583
 1995_5_0960-9822_11_1257
 1996_12_0168-9525_10_405
 1996_12_0168-9525_9_345
 1996_274_0036-8075_5290_1201
 1996_274_0036-8075_5293_1646
 1996_274_0036-8075_5293_1652
 1996_274_0036-8075_5293_1659
 1996_6_0959-437X_2_203
 1996_6_0959-437X_2_203
 1996_6_0959-437X_2_208
 1996_6_0959-437X_2_208
 1996_6_0960-9822_2_189
 1996_6_0960-9822_3_229
 1996_6_0962-8924_5_184
 1996_85_0092-8674_1_39
 1996_85_0092-8674_6_785
 1996_87_0092-8674_1_53
 1996_8_0955-0674_4_499
 1996_8_0955-0674_4_499
 1996_8_0955-0674_6_815
 1996_8_0955-0674_6_815
 1997_11_0890-9369_21_2767
 1997_11_0890-9369_24_3375
 1997_136_0021-9525_1_125
 1997_137_0021-9525_1_183
 1997_139_0021-9525_1_13
 1997_13_1081-0706__261
Error parsing file 1997_13_1081-0706__261_111058275372002. Error code .
 1997_13_1081-0706__293
 1997_16_0261-4189_10_2693
 1997_16_0261-4189_10_2693
 1997_16_0261-4189_19_5966
 1997_16_0261-4189_19_5966
 1997_16_0261-4189_19_5988
 1997_16_0261-4189_19_5988
 1997_51_0066-4227__125
 1997_7_0959-437X_1_17
 1997_7_0959-437X_1_17
 1997_7_0962-8924_1_9
 1997_7_0962-8924_3_95
 1997_88_0092-8674_4_493
 1997_90_0092-8674_4_649
 1997_90_0092-8674_4_671
 1997_91_0092-8674_1_59
 1997_94_0027-8424_11_5611
 1997_94_0027-8424_11_5611
 1997_94_0027-8424_12_6142
 1997_94_0027-8424_12_6142
 1997_94_0027-8424_15_7965
 1997_94_0027-8424_15_7965
 1997_94_0027-8424_17_9147
 1997_94_0027-8424_17_9147
 1997_94_0027-8424_1_142
 1997_94_0027-8424_1_142
 1997_9_0955-0674_3_358
 1997_9_0955-0674_3_358
 1998_12_0890-9369_4_480
 1998_12_0890-9369_5_734
 1998_1398_0167-4781_2_113
 1998_140_0021-9525_2_271
 1998_17_0261-4189_10_2961
 1998_17_0261-4189_14_4139
 1998_17_0261-4189_14_4139
 1998_17_0261-4189_17_5182
 1998_17_0261-4189_17_5182
 1998_17_0261-4189_18_5360
 1998_17_0261-4189_18_5360
 1998_17_0261-4189_19_5699
 1998_17_0261-4189_19_5699
 1998_17_0261-4189_24_7219
 1998_17_0261-4189_24_7219
 1998_17_0261-4189_2_482
 1998_17_0261-4189_2_498
 1998_18_0270-7306_5_2559
 1998_18_0270-7306_5_2923
 1998_1_1097-2765_3_457
 1998_1_1097-2765_4_519
 1998_1_1097-2765_5_685
 1998_200_0012-1606_2_182
 1998_238_0014-4827_1_63
 1998_244_0014-4827_2_372
 1998_273_0021-9258_27_17095
 1998_279_0036-8075_5354_1216
 1998_280_0036-8075_5363_593
 1998_282_0036-8075_5394_1721
 1998_2_1097-2765_1_23
 1998_62_1092-2172_4_1191
 1998_8_0960-9822_24_1327
 1998_8_0960-9822_4_235
 1998_8_0960-9822_9_497
 1998_93_0092-8674_6_1043
 1998_95_0027-8424_5_2384
 1998_95_0027-8424_5_2384
 1998_9_1059-1524_1_63
 1999_10_1059-1524_10_3263
 1999_13_0890-9369_17_2242
 1999_13_0890-9369_21_2751
 1999_145_0021-9525_5_979
 1999_15_0168-9525_9_340
 1999_18_0261-4189_10_2707
 1999_18_0261-4189_10_2707
 1999_18_0261-4189_19_5334
 1999_18_0261-4189_19_5334
 1999_18_0261-4189_2_396
 1999_18_0261-4189_2_396
 1999_18_1046-2023_3_329
 1999_18_1046-2023_3_407
 1999_19_0270-7306_2_1226
 1999_1_1465-7392_7_415
 1999_262_0006-291X_2_368
 1999_264_0014-2956_2_415
 1999_4_1356-9597_2_111
 1999_68_0066-4154__649
 1999_96_0027-8424_2_441
 1999_96_0027-8424_2_441
 1999_96_0092-8674_4_529
 2000_10_0960-9822_5_231
 2000_113_0021-9533_11_1929
 2000_11_1059-1524_1_369
 2000_129_1047-8477_2-3_186
 2000_14_0890-9369_13_1631
 2000_14_0890-9369_19_2526
 2000_16_0749-503X_10_905
 2000_182_0378-1097_1_137
 2000_19_0261-4189_11_2728
 2000_19_0261-4189_11_2728
 2000_19_0261-4189_7_1681
 2000_19_0261-4189_7_1681
 2000_19_0261-4189_9_2082
 2000_19_0261-4189_9_2082
 2000_20_0270-7306_13_4483
 2000_20_0270-7306_1_242
 2000_20_0270-7306_22_8602
 2000_20_0270-7306_9_3086
 2000_275_0021-9258_13_9734
 2000_275_0021-9258_21_16235
 2000_275_0021-9258_45_35051
 2000_299_0022-2836_3_667
 2000_375_0003-9861_1_154
 2000_4_1367-5931_5_581
 2000_5_1097-2765_1_85
 2000_69_0066-4154__829
 2000_79_0171-9335_3_192
 2000_97_0027-8424_26_14115
 2000_97_0027-8424_26_14115
 2001_107_0092-8674_6_689
 2001_114_0021-9533_8_1447
 2001_128_0034-5687_3_393
 2001_12_1059-1524_11_3658
 2001_159_0016-6731_1_17
 2001_20_0261-4189_17_4648
 2001_20_0261-4189_17_4648
 2001_20_0261-4189_17_4836
 2001_20_0261-4189_17_4836
 2001_21_0270-7306_13_4149
 2001_21_0270-7306_17_5767
 2001_266_1617-4615_1_115
 2001_276_0021-9258_18_15397
 2001_276_0021-9258_37_34428
 2001_276_0021-9258_48_44905
 2001_29_0305-1048_7_1433
 2001_29_0305-1048_7_1433
 2001_35_0066-4197__673
 2001_3_1465-7392_1_38
 2001_3_1465-7392_2_107
 2001_3_1465-7392_2_E49
 2001_411_0028-0836_6841_1068
 2001_98_0027-8424_20_11211
 2001_98_0027-8424_20_11211
 2001_98_0027-8424_23_13114
 2001_98_0027-8424_23_13114
 2002_109_0092-8674_7_849
 2002_12_0960-9822_21_1817
 2002_12_0962-8924_2_72
 2002_13_1059-1524_12_4388
 2002_13_1059-1524_2_503
 2002_13_1059-1524_2_607
 2002_140_1047-8477_1-3_17
 2002_16_0890-9369_10_1182
 2002_16_0890-9369_17_2179
 2002_190_0021-9541_1_7
 2002_207_0378-1097_2_165
 2002_21_0950-9232_22_3525
 2002_277_0021-9258_18_16033
 2002_71_0066-4154__333
 2002_7_1356-9597_6_523
 2002_7_1356-9597_6_523
 2002_9_1097-2765_5_1067
 2003_100_0027-8424_23_13241
 2003_100_0027-8424_23_13241
 2003_11_1097-2765_4_997
 2003_165_0016-6731_2_489
 2003_5_1465-7392_12_1090
 2004_103_0006-4971_10_3717
 2004_131_0950-1991_19_4807
 2004_14_0960-9822_18_R778
 2004_1695_0167-4889_1-3_133
 2004_18_0890-9369_9_981
 2004_23_0261-4189_15_3122
 2004_279_0021-9258_17_17283
 2004_279_0021-9258_29_30807
 2004_279_0021-9258_7_5802
 2004_3_1568-7864_8-9_1057
 2004_5_1398-9219_12_925
 2004_5_1471-0072_12_983
 2004_5_1567-1356_2_133
 2004_68_1092-2172_1_109
 2005_10_1356-9597_1_63
 2005_16_1059-1524_1_421
 2005_19_0890-9369_1_114
 2005_24_0950-9232_17_2827
 2005_280_0021-9258_24_23416
 2005_280_0021-9258_30_27624
 2005_6_1471-0072_6_476
 2005_7_1462-5814_2_259
 
	Citances for PMID: 8941092
 1996_94_0009-7322_11_2703
 1998_98_0009-7322_21_2235
 1999_100_0009-7322_9_981
 1999_48_0026-0495_7_887
 1999_99_0009-7322_8_1062
 2002_30_0090-3493_12_2689
 2002_32_0014-2972_3_141
 2002_39_0735-1097_3_413
 
	Citances for PMID: 10097108
 1999_18_0950-9232_45_6135
 1999_18_0950-9232_53_7644
 1999_18_0950-9232_55_7883
 1999_19_0270-7306_10_6833
 1999_19_0270-7306_11_7410
 1999_274_0021-9258_49_34779
 1999_286_0036-8075_5442_1162
 1999_4_1097-2765_3_387
 1999_96_0027-8424_24_13777
 1999_96_0027-8424_24_13777
 1999_9_0960-9822_19_1135
 2000_113_0021-9533_22_3889
 2000_11_1059-1524_1_1
 2000_11_1059-1524_5_1535
 2000_12_0955-0674_6_658
 2000_12_0955-0674_6_658
 2000_12_0955-0674_6_697
 2000_12_0955-0674_6_697
 2000_14_0890-9369_12_1439
 2000_14_0890-9369_12_1448
 2000_14_0890-9369_21_2745
 2000_14_0890-9369_23_2989
 2000_14_0890-9369_3_278
 2000_14_0890-9369_3_289
 2000_151_0021-9525_7_1381
 2000_153_0033-7587_3_245
 2000_154_0016-6731_4_1577
 2000_20_0270-7306_13_4543
 2000_20_0270-7306_23_8758
 2000_275_0021-9258_14_10342
 2000_275_0021-9258_20_15363
 2000_275_0021-9258_30_22719
 2000_275_0021-9258_34_26343
 2000_275_0021-9258_8_5600
 2000_277_0006-291X_1_107
 2000_28_0305-1048_8_1692
 2000_28_0305-1048_8_1692
 2000_28_0891-5849_9_1387
 2000_2_1465-7392_10_762
 2000_302_0022-2836_4_927
 2000_33_0960-7722_5_261
 2000_404_0028-0836_6778_613
 2000_451_0027-5107_1-2_211
 2000_471_0014-5793_2-3_141
 2000_487_0014-5793_2_277
 2000_60_0008-5472_21_5934
 2000_60_0008-5472_3_566
 2000_60_0008-5472_8_2108
 2000_69_0066-4154__829
 2000_6_1097-2765_4_839
 2000_97_0027-8424_19_10389
 2000_97_0027-8424_19_10389
 2001_12_1059-1524_3_551
 2001_1519_0167-4781_1-2_1
 2001_154_0021-9525_5_913
 2001_15_0890-9369_17_2177
 2001_20_0950-9232_37_5100
 2001_21_0270-7306_12_4005
 2001_21_0270-7306_13_4129
 2001_21_0270-7306_15_5214
 2001_21_0270-7306_4_1066
 2001_21_0270-7306_4_1329
 2001_25_0145-2126_4_333
 2001_271_0378-1119_2_143
 2001_276_0021-9258_17_14019
 2001_276_0021-9258_21_17693
 2001_276_0021-9258_28_25903
 2001_276_0021-9258_32_30537
 2001_276_0021-9258_45_41656
 2001_276_0021-9258_4_2708
 2001_276_0021-9258_4_2971
 2001_276_0021-9258_51_48231
 2001_289_0006-291X_5_1199
 2001_2_1471-0072_12_877
 2001_35_0066-4197__209
 2001_392_0003-9861_2_311
 2001_477_0027-5107_1-2_131
 2001_491_0014-5793_3_261
 2001_505_0014-5793_1_7
 2001_61_0008-5472_10_3894
 2001_61_0008-5472_13_4990
 2001_61_0008-5472_14_5362
 2001_61_0008-5472_22_8062
 2001_61_0008-5472_3_1065
 2001_61_0008-5472_9_3787
 2001_7_1097-2765_1_13
 2001_8_1350-9047_11_1052
 2001_98_0027-8424_21_12044
 2001_98_0027-8424_21_12044
 2002_118_0022-202X_5_818
 2002_12_0960-9822_1_73
 2002_14_0955-0674_2_237
 2002_14_0955-0674_2_237
 2002_21_0950-9232_53_8089
 2002_22_0270-7306_12_4419
 2002_22_0270-7306_2_555
 2002_277_0021-9258_18_16102
 2002_277_0021-9258_22_19389
 2002_277_0021-9258_25_22469
 2002_277_0021-9258_43_40520
 2002_277_0021-9258_50_48418
 2002_290_0006-291X_1_225
 2002_295_0006-291X_3_673
 2002_4_1465-7392_11_865
 2002_62_0008-5472_20_5743
 2002_62_0008-5472_22_6357
 2002_62_0008-5472_6_1598
 2002_99_0020-7136_1_58
 2002_99_0027-8424_15_9825
 2002_99_0027-8424_15_9825
 2002_9_1097-2765_5_1045
 2003_163_0016-6731_3_973
 2003_1_1541-7786_8_598
 2003_22_0950-9232_34_5338
 2003_22_0950-9232_56_9048
 2003_278_0021-9258_10_8468
 2003_278_0021-9258_23_20475
 2003_278_0021-9258_23_20480
 2003_278_0021-9258_24_21715
 2003_278_0021-9258_33_30869
 2003_278_0021-9258_8_6323
 2003_75_0014-4800_2_131
 2004_11_1350-9047__S153
 2004_23_0950-9232_29_4966
 2004_23_0950-9232_46_7691
 2004_24_0270-7306_22_9968
 2004_24_0270-7306_7_2968
 2004_279_0021-9258_24_25093
 2004_279_0021-9258_38_39584
 2004_279_0021-9258_7_6098
 2004_3_1568-7864_8-9_1009
 2004_3_1568-7864_8-9_1039
 2004_4_1474-175X_3_216
 2004_73_0066-4154__39
 2005_118_0021-9533_9_1833
 2005_14_0964-6906_4_555
 2005_16_1059-1524_3_1513
 2005_280_0021-9258_12_12041
 2005_280_0021-9258_9_7748
 2005_328_0006-291X_2_567
 
	Citances for PMID: 10517317
 2000_113_0021-9533_12_2111
 2000_69_0066-4154__829
 2001_264_0378-1119_2_249
 2001_276_0021-9258_33_31376
 2002_190_0021-9541_3_287
 2002_21_0950-9232_51_7786
 2002_22_0270-7306_13_4477
 2002_273_0014-4827_1_54
 2002_277_0021-9258_31_27668
 2003_327_0022-2836_1_111
 2003_532_0027-5107_1-2_29
 2005_280_0021-9258_13_13062
 
	Citances for PMID: 10330168
 1999_13_0890-9369_16_2039
 1999_18_0261-4189_19_5334
 1999_18_0261-4189_19_5334
 1999_18_0261-4189_20_5703
 1999_18_0261-4189_20_5703
 1999_18_0261-4189_22_6561
 1999_18_0261-4189_22_6561
 1999_19_0270-7306_6_4270
 2000_10_0959-437X_2_178
 2000_10_0959-437X_2_178
 2000_113_0021-9533_12_2111
 2000_14_0890-9369_12_1528
 2000_19_0261-4189_18_5027
 2000_19_0261-4189_18_5027
 2000_1_1469-221X_4_319
 2000_1_1469-221X_4_319
 2000_20_0270-7306_11_3795
 2000_20_0270-7306_20_7613
 2000_20_0270-7306_9_3086
 2000_275_0006-291X_1_228
 2000_451_0027-5107_1-2_187
 2000_5_1356-9597_6_463
 2000_69_0066-4154__829
 2001_114_0021-9533_8_1447
 2001_11_0960-9822_9_R367
 2001_12_1059-1524_5_1257
 2001_154_0021-9525_1_85
 2001_21_0270-7306_11_3692
 2001_264_0378-1119_2_249
 2001_276_0021-9258_33_31376
 2002_161_0016-6731_1_47
 2002_16_0890-9369_17_2179
 2002_1_1535-9778_1_1
 2002_22_0270-7306_13_4477
 2002_22_0270-7306_1_309
 2002_71_0066-4154__333
 2003_14_1059-1524_5_2163
 2003_24_0197-4580_5_687
 2003_532_0027-5107_1-2_21
 2003_8_1356-9597_5_451
 2004_14_0960-9822_18_R778
 2004_68_1092-2172_1_109
 2005_24_0950-9232_17_2827
 
	Citances for PMID: 9572736
 1998_10_0955-0674_6_749
 1998_10_0955-0674_6_749
 1998_142_0021-9525_6_1559
 1998_149_0016-6731_4_1729
 1998_150_0016-6731_4_1361
 1998_17_0261-4189_22_6678
 1998_17_0261-4189_22_6678
 1998_17_0261-4189_24_7239
 1998_17_0261-4189_24_7239
 1998_23_0968-0004_10_399
 1998_280_0036-8075_5365_909
 1998_282_0036-8075_5395_1886
 1998_282_0036-8075_5395_1893
 1998_95_0027-8424_21_12334
 1998_95_0027-8424_21_12334
 1999_10_1059-1524_4_833
 1999_10_1059-1524_9_2905
 1999_13_0890-9369_19_2581
 1999_13_0890-9369_5_620
 1999_146_0021-9525_3_573
 1999_147_0021-9525_2_295
 1999_152_0016-6731_4_1501
 1999_18_0950-9232_25_3673
 1999_18_0950-9232_28_4047
 1999_18_0950-9232_46_6296
 1999_18_0950-9232_55_7883
 1999_19_0270-7306_11_7410
 1999_19_0270-7306_2_1126
 1999_19_0270-7306_6_4262
 1999_19_0270-7306_8_5535
 1999_19_0270-7306_9_5981
 1999_286_0036-8075_5449_2528
 1999_4_1097-2765_5_805
 1999_58_0006-2952_11_1713
 1999_59_0008-5472_23_5887
 1999_96_0027-8424_7_3745
 1999_96_0027-8424_7_3745
 1999_9_0960-9822_1_1
 1999_9_0960-9822_23_1427
 1999_9_0960-9822_6_302
 2000_100_0092-8674_6_681
 2000_10_0962-8924_7_296
 2000_113_0021-9533_22_3889
 2000_11_1044-9523_4_211
 2000_11_1059-1524_1_1
 2000_11_1059-1524_5_1535
 2000_14_0890-9369_12_1448
 2000_14_0890-9369_3_278
 2000_155_0016-6731_2_623
 2000_1_1469-221X_4_319
 2000_1_1469-221X_4_319
 2000_20_0270-7306_12_4288
 2000_20_0270-7306_13_4838
 2000_20_0270-7306_21_7853
 2000_20_0270-7306_23_8758
 2000_20_0270-7306_4_1254
 2000_20_0270-7306_9_3234
 2000_275_0021-9258_44_34710
 2000_275_0021-9258_8_5600
 2000_451_0027-5107_1-2_211
 2000_5_1356-9597_7_525
 2000_60_0008-5472_3_566
 2000_69_0066-4154__829
 2000_74_0022-538X_6_2636
 2000_74_0022-538X_6_2636
 2000_97_0027-8424_6_2579
 2000_97_0027-8424_6_2579
 2000_97_0027-8424_7_3730
 2000_97_0027-8424_7_3730
 2001_12_1044-9523_12_581
 2001_12_1059-1524_1_115
 2001_12_1059-1524_3_551
 2001_12_1059-1524_5_1257
 2001_154_0021-9525_5_913
 2001_159_0016-6731_2_471
 2001_21_0270-7306_10_3289
 2001_21_0270-7306_10_3398
 2001_21_0270-7306_13_4129
 2001_21_0270-7306_14_4495
 2001_21_0270-7306_5_1499
 2001_276_0021-9258_1_835
 2001_276_0021-9258_46_42971
 2001_287_0042-6822_2_359
 2001_3_1465-7392_11_966
 2001_410_0028-0836_6830_842
 2001_505_0014-5793_1_7
 2001_61_0008-5472_3_1065
 2001_8_1097-2765_5_1117
 2002_161_0016-6731_4_1437
 2002_19_0749-503X_13_1139
 2002_1_1535-9778_5_758
 2002_1_1568-7864_3_175
 2002_21_0950-9232_11_1717
 2002_277_0021-9258_43_41183
 2002_295_0006-291X_3_673
 2002_417_0028-0836_6885_197
 2002_4_1465-7392_5_384
 2002_7_1356-9597_7_663
 2002_99_0027-8424_23_14795
 2002_99_0027-8424_23_14795
 2003_116_0021-9533_24_4883
 2003_116_0021-9533_2_259
 2003_11_1097-2765_2_303
 2003_14_1059-1524_12_5116
 2003_17_0890-9369_24_3017
 2003_17_0890-9369_5_615
 2003_218_0032-0935_1_50
 2003_22_0261-4189_3_713
 2003_22_0261-4189_3_713
 2003_22_0950-9232_38_5927
 2003_23_0270-7306_16_5939
 2003_23_0270-7306_18_6553
 2003_23_0270-7306_18_6564
 2003_23_0270-7306_21_7861
 2003_278_0021-9258_39_37006
 2003_36_0899-1987_4_171
 2003_532_0027-5107_1-2_75
 2003_94_8750-7587_5_2068
 2004_101_0027-8424_13_4419
 2004_101_0027-8424_13_4419
 2004_15_1059-1524_9_4051
 2004_23_0261-4189_2_418
 2004_23_0950-9232_33_5586
 2004_24_0270-7306_19_8342
 2004_279_0021-9258_31_32079
 2004_279_0021-9258_45_47372
 2004_279_0021-9258_51_53023
 2004_315_0006-291X_4_984
 2004_3_1568-7864_8-9_1025
 2004_3_1568-7864_8-9_901
 2004_67_0006-2952_7_1373
 2005_118_0021-9533_9_1833
 2005_16_1059-1524_3_1513
 2005_16_1059-1524_4_1651
 2005_19_0890-9369_8_919
 2005_25_0270-7306_2_563
 2005_4_1535-9778_1_166
 2005_87_0300-9084_7_591
 
	Citances for PMID: 8600024
 1996_274_0036-8075_5293_1664
 1996_8_0955-0674_6_781
 1996_8_0955-0674_6_781
 1996_93_0027-8424_26_15075
 1996_93_0027-8424_26_15075
 1997_11_0890-9369_22_3032
 1997_16_0261-4189_17_5216
 1997_16_0261-4189_17_5216
 1997_16_0261-4189_3_639
 1997_16_0261-4189_3_639
 1997_22_0968-0004_11_424
 1997_272_0021-9258_20_12961
 1997_31_0066-4197__635
 1997_90_0092-8674_3_425
 1997_94_0027-8424_26_14361
 1997_94_0027-8424_26_14361
 1998_10_0955-0674_2_240
 1998_10_0955-0674_2_240
 1998_10_0955-0674_6_749
 1998_10_0955-0674_6_749
 1998_12_0890-9369_18_2956
 1998_12_0890-9369_22_3551
 1998_12_0890-9369_3_382
 1998_142_0021-9525_6_1559
 1998_150_0016-6731_4_1419
 1998_17_0261-4189_14_4199
 1998_17_0261-4189_14_4199
 1998_17_0261-4189_19_5525
 1998_17_0261-4189_19_5525
 1998_17_0261-4189_19_5679
 1998_17_0261-4189_19_5679
 1998_17_0261-4189_6_1819
 1998_17_0261-4189_7_2055
 1998_17_0261-4189_9_2687
 1998_18_0270-7306_9_5485
 1998_1_1097-2765_3_347
 1998_26_0305-1048_23_5402
 1998_26_0305-1048_23_5402
 1998_281_0036-8075_5374_272
 1998_2_1097-2765_2_183
 1998_2_1097-2765_3_329
 1998_62_1092-2172_4_1191
 1998_8_0959-437X_2_185
 1998_8_0959-437X_2_185
 1998_94_0092-8674_5_595
 1999_151_0016-6731_2_459
 1999_151_0016-6731_3_965
 1999_18_0261-4189_11_3173
 1999_18_0261-4189_11_3173
 1999_18_0261-4189_16_4485
 1999_18_0261-4189_16_4485
 1999_18_0261-4189_22_6561
 1999_18_0261-4189_22_6561
 1999_18_0950-9232_28_4047
 1999_19_0270-7306_10_7041
 1999_19_0270-7306_2_1136
 1999_21_1061-4036_2_177
 1999_21_1061-4036_2_204
 1999_4_1097-2765_3_387
 1999_63_1092-2172_2_349
 1999_96_0027-8424_7_3745
 1999_96_0027-8424_7_3745
 1999_96_0027-8424_7_3824
 1999_96_0027-8424_7_3824
 1999_9_0960-9822_1_1
 2000_101_0092-8674_2_211
 2000_11_1059-1524_5_1535
 2000_11_1059-1524_8_2605
 2000_12_0955-0674_6_697
 2000_12_0955-0674_6_697
 2000_14_0890-9369_12_1448
 2000_14_0890-9369_16_2046
 2000_14_0890-9369_1_81
 2000_14_0890-9369_3_278
 2000_151_0021-9525_7_1381
 2000_154_0016-6731_4_1523
 2000_19_0261-4189_18_5027
 2000_19_0261-4189_18_5027
 2000_19_0261-4189_21_5801
 2000_19_0261-4189_21_5801
 2000_20_0270-7306_12_4393
 2000_20_0270-7306_16_5888
 2000_264_0026-8925_4_378
 2000_28_0305-1048_19_3725
 2000_28_0305-1048_19_3725
 2000_28_0305-1048_8_1692
 2000_28_0305-1048_8_1692
 2000_451_0027-5107_1-2_187
 2000_451_0027-5107_1-2_91
 2000_471_0014-5793_2-3_141
 2000_69_0066-4154__829
 2000_97_0027-8424_18_10077
 2000_97_0027-8424_18_10077
 2001_11_0960-9822_13_1053
 2001_157_0016-6731_2_567
 2001_15_0890-9369_14_1845
 2001_15_0890-9369_21_2809
 2001_20_0261-4189_11_2896
 2001_20_0261-4189_11_2896
 2001_20_0261-4189_13_3544
 2001_20_0261-4189_13_3544
 2001_20_0261-4189_22_6485
 2001_20_0261-4189_22_6485
 2001_21_0270-7306_11_3725
 2001_21_0270-7306_12_3913
 2001_21_0270-7306_15_5156
 2001_21_0270-7306_16_5359
 2001_21_0270-7306_17_5838
 2001_21_0270-7306_21_7150
 2001_21_0270-7306_3_755
 2001_264_0014-4827_1_67
 2001_276_0021-9258_17_14019
 2001_29_0305-1048_23_4808
 2001_29_0305-1048_23_4808
 2001_3_1465-7392_11_958
 2001_3_1465-7392_9_844
 2001_61_0008-5472_9_3787
 2001_7_1097-2765_1_13
 2001_7_1097-2765_2_293
 2001_7_1097-2765_6_1255
 2002_10_1097-2765_2_373
 2002_14_0955-0674_2_237
 2002_14_0955-0674_2_237
 2002_160_0016-6731_1_123
 2002_16_0890-9369_24_3236
 2002_1_1568-7864_3_175
 2002_22_0270-7306_12_4419
 2002_529_0014-5793_1_43
 2002_99_0027-8424_20_12997
 2002_99_0027-8424_20_12997
 2002_9_1097-2765_4_857
 2002_9_1097-2765_5_1055
 2003_100_0027-8424_5_2249
 2003_100_0027-8424_5_2249
 2003_115_0092-8674_5_537
 2003_11_1097-2765_3_827
 2003_11_1097-2765_5_1323
 2003_12_1097-2765_6_1525
 2003_14_1059-1524_3_987
 2003_17_0890-9369_14_1755
 2003_17_0890-9369_16_1957
 2003_23_0270-7306_10_3405
 2003_23_0270-7306_17_6300
 2003_23_0270-7306_4_1441
 2003_278_0021-9258_10_8795
 2003_278_0021-9258_20_17609
 2003_2_1535-9778_2_306
 2003_31_0305-1048_6_1715
 2003_31_0305-1048_6_1715
 2004_15_1059-1524_12_5443
 2004_15_1059-1524_9_4051
 2004_167_0016-6731_1_21
 2004_16_1097-2765_5_687
 2004_23_0261-4189_2_429
 2004_24_0270-7306_11_4769
 2004_24_0270-7306_23_10208
 2004_24_0270-7306_8_3277
 2004_279_0021-9258_25_26762
 2004_279_0021-9258_38_39636
 2004_3_1568-7864_12_1591
 2004_3_1568-7864_7_769
 2005_118_0021-9533_9_1833
 2005_16_1084-9521_3_355
 2005_25_0270-7306_15_6707
 
	Citances for PMID: 9450932
 1998_10_0955-0674_6_749
 1998_10_0955-0674_6_749
 1998_12_0890-9369_18_2956
 1998_12_0890-9369_3_382
 1998_14_0168-9525_8_312
 1998_150_0016-6731_4_1361
 1998_17_0261-4189_24_7239
 1998_17_0261-4189_24_7239
 1998_17_0261-4189_7_2055
 1998_23_0968-0004_10_399
 1998_26_0305-1048_23_5261
 1998_26_0305-1048_23_5261
 1998_280_0036-8075_5365_909
 1998_281_0036-8075_5374_185
 1998_282_0036-8075_5395_1893
 1998_94_0092-8674_5_555
 1998_9_1059-1524_8_2107
 1999_10_1059-1524_10_3223
 1999_10_1059-1524_11_3661
 1999_10_1059-1524_12_3991
 1999_10_1059-1524_2_245
 1999_10_1059-1524_4_833
 1999_10_1059-1524_6_1985
 1999_10_1059-1524_9_2905
 1999_13_0890-9369_19_2581
 1999_13_0890-9369_5_620
 1999_147_0021-9525_2_295
 1999_152_0016-6731_4_1501
 1999_18_0261-4189_11_3173
 1999_18_0261-4189_11_3173
 1999_18_0950-9232_25_3673
 1999_18_0950-9232_28_4047
 1999_18_0950-9232_45_6135
 1999_18_0950-9232_55_7883
 1999_18_1046-2023_3_335
 1999_19_0270-7306_11_7410
 1999_19_0270-7306_2_1126
 1999_19_0270-7306_6_4262
 1999_19_0270-7306_8_5535
 1999_1_1465-7392_7_393
 1999_274_0021-9258_44_31463
 1999_286_0036-8075_5449_2528
 1999_4_1097-2765_2_167
 1999_4_1097-2765_5_805
 1999_96_0027-8424_14_7821
 1999_96_0027-8424_14_7821
 1999_96_0027-8424_15_8443
 1999_96_0027-8424_15_8443
 1999_96_0027-8424_7_3745
 1999_96_0027-8424_7_3745
 1999_9_0960-9822_1_1
 1999_9_0960-9822_23_1427
 2000_100_0092-8674_6_681
 2000_10_0960-9822_24_1565
 2000_10_0960-9822_24_R908
 2000_10_0962-8924_7_296
 2000_113_0021-9533_22_3889
 2000_11_1059-1524_1_1
 2000_11_1059-1524_5_1535
 2000_12_0955-0674_6_697
 2000_12_0955-0674_6_697
 2000_14_0890-9369_12_1439
 2000_14_0890-9369_12_1448
 2000_14_0890-9369_21_2745
 2000_14_0890-9369_3_278
 2000_14_0890-9369_3_289
 2000_19_0261-4189_21_5801
 2000_19_0261-4189_21_5801
 2000_19_0950-9232_53_6176
 2000_1_1471-0072_3_179
 2000_20_0270-7306_12_4288
 2000_20_0270-7306_13_4838
 2000_20_0270-7306_21_7853
 2000_20_0270-7306_21_7922
 2000_20_0270-7306_23_8758
 2000_20_0270-7306_23_8958
 2000_20_0270-7306_4_1254
 2000_20_0270-7306_9_3234
 2000_275_0021-9258_8_5600
 2000_451_0027-5107_1-2_197
 2000_451_0027-5107_1-2_211
 2000_471_0014-5793_2-3_141
 2000_5_1356-9597_7_525
 2000_69_0066-4154__829
 2000_6_1097-2765_4_839
 2000_6_1097-2765_5_1169
 2000_97_0027-8424_6_2579
 2000_97_0027-8424_6_2579
 2001_12_1059-1524_1_115
 2001_12_1059-1524_5_1257
 2001_159_0016-6731_2_471
 2001_15_0890-9369_13_1674
 2001_21_0270-7306_10_3289
 2001_21_0270-7306_10_3398
 2001_21_0270-7306_13_4129
 2001_21_0270-7306_14_4495
 2001_21_0270-7306_5_1499
 2001_264_0014-4827_1_67
 2001_276_0021-9258_19_16580
 2001_276_0021-9258_46_42971
 2001_287_0006-291X_3_775
 2001_3_1465-7392_11_958
 2001_3_1465-7392_11_966
 2001_3_1465-7392_12_E277
 2001_412_0028-0836_6846_557
 2001_41_0362-1642__367
 2001_491_0014-5793_3_261
 2001_8_1097-2765_5_1117
 2002_115_0021-9533_18_3609
 2002_12_0960-9822_1_73
 2002_13_1059-1524_2_480
 2002_13_1059-1524_5_1462
 2002_14_0955-0674_2_237
 2002_14_0955-0674_2_237
 2002_160_0016-6731_3_891
 2002_1_1535-9778_5_758
 2002_1_1568-7864_12_983
 2002_1_1568-7864_3_175
 2002_21_0950-9232_50_7710
 2002_22_0270-7306_13_4477
 2002_277_0021-9258_18_16102
 2002_277_0021-9258_43_41183
 2002_295_0006-291X_3_673
 2002_297_0036-8075_5581_599
 2002_36_0066-4197__617
 2002_417_0028-0836_6885_197
 2002_4_1465-7392_5_384
 2002_7_1356-9597_7_663
 2002_99_0027-8424_11_7472
 2002_99_0027-8424_11_7472
 2002_99_0027-8424_19_12079
 2002_99_0027-8424_19_12079
 2002_99_0027-8424_23_14795
 2002_99_0027-8424_23_14795
 2002_9_1097-2765_4_703
 2002_9_1097-2765_4_857
 2002_9_1097-2765_5_1055
 2003_100_0027-8424_19_10758
 2003_100_0027-8424_19_10758
 2003_116_0021-9533_17_3519
 2003_11_1097-2765_2_303
 2003_14_1059-1524_9_3898
 2003_160_0033-7587_5_549
 2003_17_0890-9369_1_64
 2003_17_0890-9369_9_1130
 2003_22_0261-4189_3_713
 2003_22_0261-4189_3_713
 2003_22_0261-4189_5_1075
 2003_22_0261-4189_5_1075
 2003_23_0270-7306_13_4728
 2003_23_0270-7306_16_5939
 2003_23_0270-7306_18_6564
 2003_23_0270-7306_21_7861
 2003_23_0270-7306_22_8395
 2003_278_0021-9258_39_37006
 2003_532_0027-5107_1-2_41
 2003_532_0027-5107_1-2_59
 2003_532_0027-5107_1-2_75
 2003_8_1356-9597_7_573
 2004_117_0021-9533_4_601
 2004_15_1059-1524_9_4051
 2004_18_0890-9369_10_1154
 2004_23_0261-4189_2_418
 2004_23_0950-9232_33_5586
 2004_23_0950-9232_7_1342
 2004_24_0270-7306_19_8342
 2004_279_0021-9258_31_32079
 2004_279_0021-9258_42_43574
 2004_279_0021-9258_45_47372
 2004_279_0021-9258_51_53023
 2004_315_0006-291X_4_984
 2004_3_1568-7864_8-9_1025
 2004_3_1568-7864_8-9_901
 2004_430_0028-0836_7003_1044
 2004_67_0006-2952_7_1373
 2005_118_0021-9533_9_1833
 2005_168_0021-9525_4_537
 2005_16_1059-1524_4_1651
 2005_17_1097-2765_1_49
 2005_19_0890-9369_8_919
 2005_25_0270-7306_13_5363
 2005_25_0270-7306_2_563
 2005_25_0270-7306_7_2770
 2005_87_0300-9084_7_591
 
	Citances for PMID: 2406029
 1990_60_0092-8674_4_665
 1990_62_0092-8674_3_469
 1990_87_0027-8424_24_9553
 1990_87_0027-8424_24_9553
 1991_5_0268-960X_3_177
 1991_64_0092-8674_5_903
 1991_64_0092-8674_6_1111
 1991_65_0092-8674_1_145
 1991_65_0092-8674_6_921
 1991_66_0092-8674_3_519
 1991_67_0092-8674_1_189
 1991_67_0092-8674_1_197
 1991_88_0027-8424_15_6843
 1992_150_0021-9541_3_484
 1992_46_0753-3322_5-7_219
 1992_68_0092-8674_2_323
 1992_68_0092-8674_4_787
 1992_70_0092-8674_1_139
 1992_89_0027-8424_11_4952
 1993_106_0300-9629_3_431
 1993_134_0016-6731_1_63
 1993_72_0092-8674_6_919
 1993_74_0092-8674_2_371
 1993_74_0092-8674_2_383
 1993_74_0092-8674_3_463
 1993_75_0092-8674_1_155
 1994_125_0021-9525_4_705
 1994_126_0021-9525_6_1341
 1994_269_0021-9258_8_5989
 1994_32_0303-2647_2_97
 1994_48_0006-2952_11_2139
 1994_6_0955-0674_6_877
 1994_6_0955-0674_6_877
 1995_129_0021-9525_3_739
 1995_129_0021-9525_6_1433
 1995_131_0021-9525_3_709
 1995_177_0021-9193_7_1662
 1995_23_0305-1048_17_3493
 1995_5_0960-9822_4_376
 1995_6_1043-4682_2_65
 1995_80_0092-8674_1_29
 1995_83_0092-8674_3_397
 1995_92_0027-8424_17_7892
 1995_92_0027-8424_17_7892
 1996_134_0021-9525_4_963
 1996_274_0036-8075_5293_1664
 1996_6_0959-437X_1_4
 1996_6_0959-437X_1_4
 1996_6_0959-437X_2_208
 1996_6_0959-437X_2_208
 1996_8_0955-0674_6_781
 1996_8_0955-0674_6_781
 1996_8_0955-0674_6_795
 1996_8_0955-0674_6_795
 1996_93_0027-8424_16_8278
 1997_11_0890-9369_21_2767
 1997_16_0261-4189_10_2682
 1997_16_0261-4189_10_2682
 1997_16_0261-4189_1_182
 1997_16_0261-4189_1_182
 1997_16_0261-4189_3_545
 1997_16_0261-4189_3_545
 1997_16_0261-4189_6_1332
 1997_16_0261-4189_6_1332
 1997_22_1087-1845_1_1
 1997_232_0014-4827_2_225
 1997_25_0305-1048_6_1162
 1997_25_0305-1048_6_1162
 1997_272_0021-9258_52_33384
 1997_277_0036-8075_5331_1497
 1997_283_0076-6879__440
 1997_7_0959-437X_1_93
 1997_7_0959-437X_1_93
 1997_7_0962-8924_7_283
 1997_89_0248-4900_3_179
 1997_94_0027-8424_23_12491
 1997_94_0027-8424_23_12491
 1998_10_0955-0674_6_749
 1998_10_0955-0674_6_749
 1998_12_0890-9369_3_382
 1998_12_0890-9369_6_831
 1998_148_0016-6731_4_1731
 1998_150_0016-6731_4_1361
 1998_17_0261-4189_1_159
 1998_17_0261-4189_4_1053
 1998_17_0261-4189_7_2055
 1998_18_0270-7306_7_3782
 1998_22_1065-6995_11-12_867
 1998_280_0036-8075_5365_909
 1998_282_0036-8075_5394_1701
 1998_400_0027-5107_1-2_153
 1998_54_0888-7543_3_424
 1998_62_1092-2172_4_1191
 1998_9_1059-1524_12_3321
 1998_9_1059-1524_2_345
 1998_9_1059-1524_8_2107
 1999_10_1059-1524_2_245
 1999_10_1059-1524_4_833
 1999_10_1059-1524_6_1985
 1999_13_0890-9369_19_2581
 1999_13_0890-9369_2_176
 1999_146_0021-9525_3_573
 1999_152_0016-6731_1_61
 1999_18_0261-4189_8_2174
 1999_18_0261-4189_8_2174
 1999_18_0950-9232_1_269
 1999_18_0950-9232_2_283
 1999_19_0270-7306_6_4262
 1999_19_0270-7306_9_5981
 1999_434_0921-8777_1_29
 1999_4_1097-2765_5_805
 1999_59_0008-5472_23_5887
 1999_96_0027-8424_7_3745
 1999_96_0027-8424_7_3745
 1999_9_0960-9822_23_1427
 1999_9_0960-9822_4_163
 2000_11_0960-0779_14_2371
 2000_11_1059-1524_1_1
 2000_149_0021-9525_7_1361
 2000_14_0890-9369_12_1439
 2000_155_0016-6731_2_623
 2000_19_0950-9232_39_4480
 2000_20_0270-7306_12_4288
 2000_20_0270-7306_9_3234
 2000_451_0027-5107_1-2_211
 2000_486_0014-5793_3_305
 2000_68_0168-1702_2_161
 2000_69_0066-4154__829
 2000_74_0022-538X_6_2636
 2000_74_0022-538X_6_2636
 2000_97_0027-8424_6_2579
 2000_97_0027-8424_6_2579
 2001_114_0021-9533_14_2649
 2001_12_1059-1524_8_2412
 2001_1519_0167-4781_1-2_1
 2001_20_0261-4189_16_4618
 2001_20_0261-4189_16_4618
 2001_229_0012-1606_1_250
 2001_276_0021-9258_45_41898
 2001_61_0008-5472_4_1493
 2001_73_0888-7543_2_179
 2002_100_0006-4971_10_3804
 2002_109_0092-8674_5_563
 2002_19_0749-503X_16_1381
 2002_1_1568-7864_12_983
 2002_524_0014-5793_1-3_79
 2003_226_1058-8388_3_491
 2003_278_0021-9258_29_26620
 2003_63_0008-5472_13_3701
 2004_15_1059-1524_3_1425
 2004_16_1097-2765_5_687
 2004_23_0950-9232_7_1342
 2004_279_0021-9258_42_43574
 2005_25_0270-7306_2_563
 2005_87_0300-9084_7_591
 
	Citances for PMID: 9691032
 1998_10_0955-0674_6_749
 1998_10_0955-0674_6_749
 1998_149_0016-6731_4_1729
 1999_18_0950-9232_45_6135
 1999_19_0270-7306_6_4262
 1999_96_0027-8424_7_3745
 1999_96_0027-8424_7_3745
 2000_10_0960-9822_24_R908
 2000_11_1059-1524_2_543
 2000_20_0270-7306_23_8758
 2000_20_0270-7306_8_2852
 2000_451_0027-5107_1-2_211
 2000_69_0066-4154__829
 2000_6_1097-2765_5_1169
 2000_97_0027-8424_6_2579
 2000_97_0027-8424_6_2579
 2001_157_0016-6731_2_567
 2001_21_0270-7306_10_3289
 2001_21_0270-7306_10_3398
 2001_21_0270-7306_14_4495
 2001_3_1465-7392_11_966
 2001_41_0362-1642__367
 2002_160_0016-6731_3_891
 2002_22_0270-7306_16_6014
 2002_277_0021-9258_43_41183
 2002_99_0027-8424_11_7472
 2002_99_0027-8424_11_7472
 2003_100_0027-8424_19_10758
 2003_100_0027-8424_19_10758
 2003_23_0270-7306_18_6564
 2003_42_0172-8083_6_313
 2005_16_1059-1524_4_1651
 2005_4_1535-9778_7_1239
 
	Citances for PMID: 1706223
 1991_5_0268-960X_3_177
 1991_64_0092-8674_6_1111
 1991_65_0092-8674_4_691
 1991_65_0092-8674_6_921
 1991_66_0092-8674_2_347
 1991_66_0092-8674_4_743
 1991_67_0092-8674_1_197
 1991_67_0092-8674_2_283
 1991_67_0092-8674_6_1181
 1991_7_0168-9525_11-12_351
 1991_88_0027-8424_19_8845
 1991_88_0027-8424_23_10500
 1991_88_0027-8424_23_10500
 1992_1114_0006-3002_2-3_179
 1992_1114_0006-3002_2-3_179
 1992_1134_0006-3002_2_113
 1992_17_0968-0004_3_114
 1992_267_0021-9258_24_16878
 1992_38_0093-691X_2_277
 1992_38_0093-691X_2_277
 1992_38_0093-691X_2_277
 1992_68_0092-8674_3_407
 1992_68_0092-8674_4_787
 1992_69_0092-8674_2_317
 1992_69_0092-8674_6_977
 1992_70_0092-8674_1_139
 1992_71_0092-8674_4_637
 1992_89_0027-8424_6_2272
 1992_89_0027-8424_7_2917
 1992_89_0027-8424_7_2917
 1993_106_0300-9629_3_431
 1993_1155_0006-3002_2_207
 1993_1155_0006-3002_2_207
 1993_117_0950-1991_1_219
 1993_134_0016-6731_1_63
 1993_14_0163-769X_1_40
 1993_157_0021-9541_2_289
 1993_59_0166-6851_1_111
 1993_59_0166-6851_1_111
 1993_5_0898-6568_4_381
 1993_72_0092-8674_6_919
 1993_73_0031-9333_4_673
 1993_74_0092-8674_2_383
 1993_74_0092-8674_3_463
 1993_75_0092-8674_1_155
 1994_125_0021-9525_4_705
 1994_269_0021-9258_8_5989
 1994_32_0303-2647_2_97
 1994_68_0022-538X_3_1728
 1994_6_0898-6568_5_539
 1994_77_0092-8674_7_1015
 1994_91_0027-8424_20_9480
 1994_91_0027-8424_21_10084
 1994_91_0027-8424_5_1731
 1995_129_0021-9525_3_739
 1995_23_0305-1048_17_3493
 1995_83_0092-8674_6_1001
 1995_92_0027-8424_17_7892
 1995_92_0027-8424_17_7892
 1995_92_0027-8424_21_9638
 1996_271_0021-9258_24_14430
 1996_271_0021-9258_7_3488
 1996_274_0036-8075_5293_1664
 1996_58_0925-4773_1-2_75
 1996_86_0092-8674_4_553
 1996_8_0955-0674_2_174
 1996_8_0955-0674_2_174
 1996_8_0955-0674_6_795
 1996_8_0955-0674_6_795
 1996_93_0027-8424_1_352
 1997_137_0021-9525_6_1337
 1997_16_0261-4189_3_545
 1997_16_0261-4189_3_545
 1997_16_0261-4189_6_1332
 1997_16_0261-4189_6_1332
 1997_16_0261-4189_6_1342
 1997_16_0261-4189_6_1342
 1997_272_0021-9258_20_13320
 1997_277_0036-8075_5331_1495
 1997_7_0962-8924_7_283
 1997_8_1059-1524_12_2475
 1997_94_0027-8424_17_9147
 1997_94_0027-8424_17_9147
 1998_12_0890-9369_7_927
 1998_148_0016-6731_4_1731
 1998_149_0016-6731_3_1221
 1998_149_0016-6731_4_1729
 1998_14_8756-7938_6_807
 1998_17_0261-4189_22_6678
 1998_17_0261-4189_22_6678
 1998_18_0270-7306_7_3782
 1998_18_0270-7306_7_4097
 1998_23_0143-4160_2-3_123
 1998_273_0021-9258_50_33455
 1998_273_0021-9258_8_4666
 1998_280_0036-8075_5365_909
 1998_90_0248-4900_6-7_467
 1998_95_0027-8424_25_14781
 1998_95_0027-8424_25_14781
 1998_9_1059-1524_12_3321
 1998_9_1059-1524_2_345
 1999_10_1059-1524_11_3661
 1999_10_1059-1524_4_833
 1999_13_0890-9369_19_2581
 1999_146_0021-9525_3_573
 1999_18_0950-9232_2_283
 1999_18_0950-9232_3_573
 1999_19_0270-7306_6_4262
 1999_19_0270-7306_7_5113
 1999_206_0012-1606_1_15
 1999_213_0012-1606_1_54
 1999_274_0021-9258_17_11977
 1999_274_0021-9258_4_1949
 1999_286_0022-2836_2_475
 1999_4_1097-2765_5_805
 1999_96_0027-8424_7_4180
 1999_96_0027-8424_7_4180
 2000_11_1059-1524_10_3411
 2000_11_1059-1524_1_1
 2000_154_0016-6731_3_1389
 2000_155_0016-6731_2_623
 2000_16_0749-503X_7_597
 2000_254_0014-4827_1_33
 2000_264_0026-8925_3_306
 2000_275_0021-9258_44_34306
 2000_28_0891-5849_9_1387
 2000_486_0014-5793_3_305
 2000_5_1356-9597_10_839
 2000_5_1356-9597_7_525
 2000_68_0168-1702_2_161
 2000_69_0066-4154__829
 2000_74_0022-538X_6_2636
 2000_74_0022-538X_6_2636
 2000_97_0027-8424_14_7865
 2000_97_0027-8424_14_7865
 2000_97_0027-8424_6_2579
 2000_97_0027-8424_6_2579
 2001_11_0962-8924_12_512
 2001_11_1054-1500_1_277
 2001_12_1059-1524_12_3892
 2001_12_1059-1524_1_53
 2001_1519_0167-4781_1-2_1
 2001_21_0270-7306_5_1499
 2001_268_0014-2956_8_2281
 2001_276_0021-9258_19_16365
 2001_276_0021-9258_4_2708
 2001_287_0042-6822_2_359
 2001_503_0014-5793_2-3_131
 2001_79_0818-9641_3_264
 2001_92_0301-4622_1-2_1
 2002_115_0021-9533_23_4555
 2002_115_0021-9533_9_1847
 2002_129_0950-1991_21_5009
 2002_129_0950-1991_9_2155
 2002_13_1059-1524_6_2080
 2002_141_0009-2797_3_211
 2002_14_0898-6568_5_467
 2002_161_0016-6731_2_721
 2002_162_0016-6731_2_689
 2002_21_0261-4189_18_4863
 2002_21_0261-4189_18_4863
 2002_249_0012-1606_1_156
 2002_269_0014-2956_14_3511
 2002_277_0021-9258_4_2637
 2002_76_0022-538X_19_9806
 2002_76_0022-538X_19_9806
 2002_76_0022-538X_2_619
 2002_76_0022-538X_2_619
 2002_9_1350-9047_4_367
 2003_100_0027-8424_19_10758
 2003_100_0027-8424_19_10758
 2003_116_0021-9533_24_4883
 2003_159_0033-7587_1_86
 2003_218_0032-0935_1_50
 2003_278_0021-9258_45_44645
 2003_27_0361-090X_3_222
 2003_36_0960-7412_6_853
 2003_77_0022-538X_3_2063
 2003_77_0022-538X_3_2063
 2004_117_0021-9533_12_2461
 2004_117_0021-9533_6_967
 2004_134_0022-3166_9_2229
 2004_15_1059-1524_3_1425
 2004_23_0950-9232_39_6590
 2004_24_0270-7306_9_3660
 2004_279_0021-9258_42_43574
 2004_315_0006-291X_4_984
 2004_37_0022-2828_3_633
 2005_102_0027-8424_25_8910
 2005_118_0021-9533_1_39
 2005_165_0028-646X_2_425
 2005_16_1059-1524_3_1513
 2005_17_1097-2765_1_49
 2005_24_0950-9232_17_2877
 2005_24_0950-9232_20_3285
 2005_25_0270-7306_2_563
 2005_87_0300-9084_7_591
 
	Citances for PMID: 10198041
 1999_10_1059-1524_4_833
 1999_10_1059-1524_9_2905
 1999_19_0270-7306_6_4262
 1999_286_0036-8075_5449_2528
 2000_20_0270-7306_12_4288
 2000_20_0270-7306_21_7922
 2000_2_1465-7392_9_672
 2000_6_1097-2765_2_487
 2000_9_1055-9965_11_1171
 2001_11_0959-437X_1_78
 2001_11_0959-437X_1_78
 2001_11_0960-9822_1_50
 2001_12_1059-1524_1_115
 2001_15_0890-9369_11_1361
 2001_21_0270-7306_10_3289
 2001_21_0270-7306_10_3398
 2001_21_0270-7306_23_8056
 2001_21_0270-7306_5_1499
 2001_229_0012-1606_1_250
 2001_276_0021-9258_1_835
 2001_276_0021-9258_46_42971
 2001_276_0021-9258_48_45201
 2001_287_0042-6822_2_359
 2001_390_0003-9861_1_9
 2001_3_1465-7392_11_966
 2001_75_0022-538X_16_7429
 2001_75_0022-538X_16_7429
 2001_98_0027-8424_1_125
 2001_98_0027-8424_1_125
 2001_98_0027-8424_20_11289
 2001_98_0027-8424_20_11289
 2002_1_1535-9778_5_758
 2002_21_0950-9232_11_1717
 2002_22_0270-7306_13_4477
 2002_277_0021-9258_30_27088
 2002_528_0014-5793_1-3_267
 2003_116_0021-9533_24_4883
 2003_116_0021-9533_2_259
 2003_14_1059-1524_10_4003
 2003_14_1059-1524_9_3898
 2003_17_0890-9369_24_3062
 2003_22_0261-4189_21_5734
 2003_22_0261-4189_21_5734
 2003_22_0261-4189_3_713
 2003_22_0261-4189_3_713
 2003_22_0950-9232_14_2110
 2003_22_0950-9232_37_5834
 2003_22_0950-9232_40_6119
 2003_23_0270-7306_22_8395
 2003_278_0021-9258_39_37006
 2003_278_0021-9258_45_44645
 2004_117_0021-9533_14_3011
 2004_162_0033-7587_4_405
 2004_23_0261-4189_16_3386
 2004_279_0021-9258_30_31164
 2004_279_0021-9258_42_43574
 2004_279_0021-9258_46_48319
 2004_279_0021-9258_51_53023
 2004_315_0006-291X_4_984
 2004_316_0006-291X_1_226
 2004_5_1567-1356_3_205
 2005_118_0021-9533_1_39
 2005_17_1097-2765_1_49
 2005_25_0270-7306_2_563
 2005_43_0899-1987_1_1
 2005_87_0300-9084_7_591
 
	Citances for PMID: 8036497
 1994_19_0968-0004_11_474
 1994_19_0968-0004_11_500
 1995_1263_0167-4781_1_79
 1995_1266_0167-4889_1_113
 1995_131_0021-9525_3_709
 1995_20_0968-0004_3_95
 1995_270_0021-9258_11_5706
 1995_270_0021-9258_45_26742
 1995_3_0969-2126_8_751
 1995_5_0960-9822_2_95
 1995_6_1043-4682_2_65
 1995_77_0300-9084_6_462
 1995_92_0027-8424_17_7892
 1995_92_0027-8424_17_7892
 1995_92_0027-8424_25_11539
 1995_92_0027-8424_25_11539
 1996_133_0021-9525_2_345
 1996_170_0378-1119_1_113
 1996_171_0378-1119_1_123
 1996_17_0896-6273_5_931
 1996_271_0021-9258_13_7362
 1996_271_0021-9258_33_20029
 1996_274_0036-8075_5293_1664
 1996_363_0921-8777_3_147
 1996_391_0014-5793_3_252
 1996_84_0092-8674_6_889
 1996_8_0955-0674_6_781
 1996_8_0955-0674_6_781
 1997_114_0032-0889_4_1421
 1997_11_0888-8809_12_1858
 1997_11_0890-9369_24_3387
 1997_16_0261-4189_3_545
 1997_16_0261-4189_3_545
 1997_190_0378-1119_2_279
 1997_1_1097-2765_1_3
 1997_230_0006-291X_2_262
 1997_25_0305-1048_6_1162
 1997_25_0305-1048_6_1162
 1997_268_0022-2836_3_619
 1997_272_0021-9258_13_8153
 1997_272_0021-9258_21_13717
 1997_272_0021-9258_40_25267
 1997_272_0021-9258_42_26219
 1997_272_0021-9258_46_28882
 1997_277_0036-8075_5331_1450
 1997_277_0036-8075_5331_1495
 1997_277_0036-8075_5331_1501
 1997_339_0003-9861_1_2
 1997_7_0959-437X_1_93
 1997_7_0959-437X_1_93
 1997_89_0092-8674_7_1055
 1997_8_1059-1524_10_1889
 1997_91_0092-8674_7_865
 1998_10_0955-0674_2_240
 1998_10_0955-0674_2_240
 1998_10_0955-0674_6_749
 1998_10_0955-0674_6_749
 1998_149_0016-6731_4_1729
 1998_150_0016-6731_4_1361
 1998_17_0261-4189_24_7239
 1998_17_0261-4189_24_7239
 1998_19_1061-4036_2_175
 1998_23_0968-0004_10_399
 1998_273_0021-9258_50_33455
 1998_273_0021-9258_6_3476
 1998_37_0006-2960_40_14317
 1998_54_0888-7543_2_344
 1998_80_0300-9084_7_621
 1998_8_0960-9822_23_1259
 1999_10_1059-1524_2_245
 1999_10_1059-1524_4_833
 1999_11_1040-4651_8_1591
 1999_13_0890-9369_6_675
 1999_147_0021-9525_5_1085
 1999_18_0950-9232_1_249
 1999_18_0950-9232_53_7706
 1999_18_0950-9232_9_1689
 1999_19_0270-7306_6_4465
 1999_234_0378-1119_2_209
 1999_260_0006-291X_2_309
 1999_274_0021-9258_44_31463
 1999_274_0021-9258_47_33474
 1999_274_0021-9258_7_4430
 1999_286_0036-8075_5449_2528
 1999_368_0003-9861_2_401
 1999_38_0006-2960_16_5216
 1999_38_0006-2960_37_12159
 1999_38_0006-2960_40_13085
 1999_59_0888-7543_1_32
 1999_9_0960-9822_1_1
 1999_9_0960-9822_23_1427
 2000_11_1044-9523_4_211
 2000_12_0898-6568_11-12_703
 2000_1492_0167-4781_2-3_395
 2000_14_0887-6924_11_1892
 2000_16_0749-503X_7_597
 2000_260_0014-4827_1_96
 2000_275_0021-9258_30_23106
 2000_275_0021-9258_38_29772
 2000_28_0305-1048_14_2709
 2000_28_0305-1048_14_2709
 2000_312_0076-6879__381
 2000_40_0362-1642__617
 2000_472_0014-5793_2-3_254
 2000_52_0031-6997_4_477
 2000_74_0022-538X_6_2636
 2000_74_0022-538X_6_2636
 2001_114_0021-9533_19_3445
 2001_11_0959-437X_1_78
 2001_11_0959-437X_1_78
 2001_11_0960-9822_1_50
 2001_13_0955-0674_2_131
 2001_13_0955-0674_2_131
 2001_18_0749-503X_10_889
 2001_1_1534-5807_3_389
 2001_20_0950-9232_32_4393
 2001_20_0950-9232_44_6331
 2001_268_0014-2956_24_6449
 2001_276_0021-9258_18_15547
 2001_276_0021-9258_48_45193
 2001_287_0042-6822_2_359
 2001_61_0008-5472_6_2343
 2001_98_0027-8424_20_11289
 2001_98_0027-8424_20_11289
 2002_115_0021-9533_23_4555
 2002_12_0960-9822_2_141
 2002_1590_0167-4889_1-3_27
 2002_162_0016-6731_2_689
 2002_19_0749-503X_13_1139
 2002_19_0749-503X_1_55
 2002_210_0378-1097_1_61
 2002_22_0270-7306_20_7105
 2002_269_0014-2956_20_4921
 2002_277_0021-9258_41_38416
 2002_277_0021-9258_42_39417
 2002_41_0006-2960_17_5566
 2002_513_0014-5793_1_53
 2002_76_0022-538X_19_9806
 2002_76_0022-538X_19_9806
 2002_956_0006-8993_1_110
 2003_14_1059-1524_6_2461
 2003_15_1040-4651_6_1399
 2003_165_0016-6731_4_1717
 2003_218_0032-0935_1_50
 2003_224_0378-1097_2_161
 2003_23_0270-7306_9_3253
 2003_300_0006-291X_3_679
 2003_3_1474-175X_12_931
 2003_8_1356-9597_4_341
 2004_117_0021-9533_14_3011
 2004_117_0021-9533_16_3489
 2004_1679_0167-4781_2_180
 2004_21_0749-503X_8_685
 2004_22_1087-0156_8_993
 2004_24_0270-7306_16_7235
 2004_279_0021-9258_31_32046
 2004_315_0006-291X_4_984
 2004_33_1046-2023_3_260
 2004_44_0172-8083_6_317
 2005_118_0021-9533_1_39
 2005_17_1097-2765_1_49
 
	Citances for PMID: 9857181
 1998_17_0261-4189_24_7239
 1998_17_0261-4189_24_7239
 1999_10_1059-1524_10_3223
 1999_10_1059-1524_11_3661
 1999_10_1059-1524_9_2905
 1999_152_0016-6731_4_1501
 1999_18_0261-4189_11_3173
 1999_18_0261-4189_11_3173
 1999_18_0950-9232_48_6707
 1999_19_0270-7306_6_4262
 1999_1_1465-7392_7_393
 1999_9_0960-9822_23_1427
 2000_100_0092-8674_6_681
 2000_10_0962-8924_7_296
 2000_19_0261-4189_21_5801
 2000_19_0261-4189_21_5801
 2000_20_0270-7306_12_4288
 2000_20_0270-7306_21_7853
 2000_20_0270-7306_4_1254
 2000_20_0270-7306_9_3234
 2000_275_0021-9258_38_29767
 2000_52_0031-6997_4_477
 2000_88_0020-7136_6_920
 2000_97_0027-8424_18_10077
 2000_97_0027-8424_18_10077
 2000_97_0027-8424_6_2579
 2000_97_0027-8424_6_2579
 2001_11_0960-9822_4_R121
 2001_12_1059-1524_1_115
 2001_21_0270-7306_3_755
 2001_287_0006-291X_3_775
 2001_3_1465-7392_11_966
 2001_3_1465-7392_12_E277
 2001_98_0027-8424_20_11289
 2001_98_0027-8424_20_11289
 2002_115_0021-9533_18_3609
 2002_115_0021-9533_23_4555
 2002_13_1059-1524_2_480
 2002_13_1059-1524_2_493
 2002_160_0016-6731_3_891
 2002_1_1568-7864_12_983
 2002_1_1568-7864_3_175
 2002_277_0021-9258_30_27088
 2002_36_0066-4197__617
 2002_52_0360-3016_3_606
 2002_7_1356-9597_7_663
 2002_99_0027-8424_11_7472
 2002_99_0027-8424_11_7472
 2002_99_0027-8424_19_12079
 2002_99_0027-8424_19_12079
 2002_9_1097-2765_4_857
 2003_100_0027-8424_19_10758
 2003_100_0027-8424_19_10758
 2003_116_0021-9533_17_3519
 2003_14_1059-1524_9_3898
 2003_164_0016-6731_2_589
 2003_17_0890-9369_8_965
 2003_17_0890-9369_9_1130
 2003_23_0270-7306_13_4728
 2003_23_0270-7306_17_6150
 2003_23_0270-7306_17_6300
 2003_278_0021-9258_39_37006
 2003_31_0305-1048_6_1715
 2003_31_0305-1048_6_1715
 2003_532_0027-5107_1-2_59
 2003_8_1356-9597_7_573
 2004_117_0021-9533_16_3489
 2004_23_0261-4189_2_418
 2004_23_0950-9232_33_5586
 2004_24_0270-7306_14_6215
 2004_24_0270-7306_20_9207
 2004_24_0270-7306_2_662
 2004_32_0305-1048_11_3316
 2004_32_0305-1048_11_3316
 2004_54_1320-5463_1_26
 2005_16_1059-1524_4_1651
 2005_25_0270-7306_7_2770
 2005_87_0300-9084_7_591
 
	Citances for PMID: 9774107
 1998_150_0016-6731_4_1361
 1998_8_0960-9822_23_1259
 1999_10_1059-1524_4_833
 1999_10_1059-1524_9_2905
 1999_13_0890-9369_19_2581
 1999_13_0890-9369_2_176
 1999_13_0890-9369_6_675
 1999_18_0261-4189_8_2174
 1999_18_0261-4189_8_2174
 1999_18_0950-9232_17_2770
 1999_18_0950-9232_28_4047
 1999_18_0950-9232_48_6707
 1999_19_0270-7306_2_1126
 1999_19_0270-7306_6_4262
 1999_19_0270-7306_6_4465
 1999_19_0270-7306_8_5535
 1999_286_0036-8075_5449_2528
 1999_38_0006-2960_47_15673
 1999_4_1097-2765_2_153
 1999_4_1097-2765_5_805
 1999_59_0008-5472_23_5887
 1999_73_0022-538X_12_10010
 1999_73_0022-538X_12_10010
 1999_96_0027-8424_7_3745
 1999_96_0027-8424_7_3745
 1999_9_0960-9822_1_1
 2000_100_0092-8674_6_681
 2000_10_0962-8924_7_296
 2000_11_1059-1524_9_3101
 2000_12_0898-6568_11-12_703
 2000_12_1040-8746_6_521
 2000_14_0890-9369_9_1027
 2000_155_0016-6731_1_159
 2000_20_0270-7306_12_4288
 2000_20_0270-7306_13_4838
 2000_20_0270-7306_4_1254
 2000_20_0270-7306_9_3234
 2000_22_0141-9838_10_521
 2000_275_0021-9258_30_23106
 2000_275_0021-9258_37_28849
 2000_275_0021-9258_38_29767
 2000_275_0021-9258_38_29772
 2000_2_1465-7392_9_609
 2000_40_0362-1642__617
 2000_466_0014-5793_1_91
 2000_5_1356-9597_7_525
 2000_6_1097-2765_3_649
 2000_74_0022-538X_1_8
 2000_74_0022-538X_1_8
 2000_97_0027-8424_6_2579
 2000_97_0027-8424_6_2579
 2001_11_0959-437X_1_78
 2001_11_0959-437X_1_78
 2001_12_1059-1524_1_115
 2001_159_0016-6731_2_557
 2001_20_0950-9232_15_1839
 2001_20_0950-9232_44_6331
 2001_21_0270-7306_10_3289
 2001_21_0270-7306_10_3398
 2001_21_0270-7306_12_3853
 2001_21_0270-7306_5_1499
 2001_229_0012-1606_1_250
 2001_276_0021-9258_14_10641
 2001_276_0021-9258_1_835
 2001_276_0021-9258_31_29282
 2001_276_0021-9258_40_37166
 2001_276_0021-9258_46_42971
 2001_276_0021-9258_52_48863
 2001_287_0042-6822_2_359
 2001_29_0305-1048_16_3439
 2001_29_0305-1048_16_3439
 2001_3_1465-7392_11_966
 2001_410_0028-0836_6830_842
 2001_508_0014-5793_3_394
 2001_61_0008-5472_15_5718
 2001_61_0008-5472_15_5843
 2001_71_0014-4800_2_156
 2001_7_1097-2765_3_615
 2001_8_1097-2765_5_983
 2001_98_0027-8424_1_125
 2001_98_0027-8424_1_125
 2002_115_0021-9533_23_4555
 2002_116_0007-1048_2_421
 2002_119_0007-1048_4_956
 2002_12_0960-9822_2_141
 2002_13_1044-9523_2_77
 2002_13_1059-1524_2_480
 2002_1_1568-7864_3_175
 2002_21_0950-9232_11_1717
 2002_22_0270-7306_20_7105
 2002_277_0021-9258_29_26553
 2002_277_0021-9258_30_27088
 2002_41_0006-2960_16_5255
 2002_41_0006-2960_17_5566
 2002_513_0014-5793_1_53
 2002_528_0014-5793_1-3_267
 2002_62_0008-5472_1_241
 2002_7_1356-9597_7_663
 2002_99_0027-8424_23_14795
 2002_99_0027-8424_23_14795
 2003_116_0021-9533_2_259
 2003_15_0898-6568_7_709
 2003_165_0016-6731_4_1717
 2003_17_0890-9369_24_3062
 2003_218_0032-0935_1_50
 2003_22_0261-4189_11_2860
 2003_22_0261-4189_11_2860
 2003_22_0261-4189_21_5734
 2003_22_0261-4189_21_5734
 2003_22_0261-4189_3_713
 2003_22_0261-4189_3_713
 2003_23_0270-7306_22_8395
 2003_278_0021-9258_39_37006
 2003_36_0960-7722_3_131
 2003_77_0022-538X_2_1257
 2003_77_0022-538X_2_1257
 2003_94_8750-7587_5_2068
 2004_15_1059-1524_9_4051
 2004_16_1097-2765_5_687
 2004_23_0950-9232_23_4155
 2004_23_0950-9232_7_1342
 2004_279_0021-9258_45_47372
 2004_279_0021-9258_51_53023
 2004_315_0006-291X_4_984
 2004_37_0022-2828_3_633
 2004_3_1568-7864_8-9_1025
 2004_67_0006-2952_7_1373
 2004_88_0022-3042_5_1114
 2005_17_1097-2765_1_49
 2005_24_0950-9232_23_3786
 2005_25_0270-7306_2_563
 2005_43_0899-1987_1_1
 2005_79_0022-538X_5_2780
 
	Citances for PMID: 9836640
 1998_282_0036-8075_5395_1893
 1999_10_1059-1524_11_3607
 1999_10_1059-1524_4_833
 1999_10_1059-1524_6_1985
 1999_11_0952-7915_4_443
 1999_13_0890-9369_19_2581
 1999_13_0890-9369_9_1067
 1999_15_0168-9525_9_340
 1999_18_0950-9232_28_4047
 1999_18_0950-9232_44_6029
 1999_18_0950-9232_50_7002
 1999_18_0950-9232_50_7070
 1999_19_0270-7306_6_4465
 1999_1_1465-7392_7_393
 1999_274_0021-9258_26_18715
 1999_274_0021-9258_31_22060
 1999_274_0021-9258_44_31463
 1999_286_0036-8075_5449_2528
 1999_4_1097-2765_2_167
 1999_59_0008-5472_11_2602
 1999_59_0008-5472_17_4375
 1999_59_0008-5472_20_5294
 1999_59_0008-5472_23_5887
 1999_59_0888-7543_1_32
 1999_73_0022-538X_12_10010
 1999_73_0022-538X_12_10010
 1999_77_0818-9641_3_263
 1999_94_0006-4971_12_3997
 1999_96_0027-8424_17_9915
 1999_96_0027-8424_17_9915
 1999_96_0027-8424_20_11352
 1999_96_0027-8424_20_11352
 1999_96_0027-8424_24_13603
 1999_96_0027-8424_24_13603
 1999_96_0027-8424_7_3824
 1999_96_0027-8424_7_3824
 2000_100_0092-8674_6_681
 2000_10_0960-9822_8_R315
 2000_11_1044-9523_9_467
 2000_121_0009-9104_1_1
 2000_14_0890-9369_4_397
 2000_14_0890-9369_6_666
 2000_14_0890-9369_8_927
 2000_19_0261-4189_3_463
 2000_19_0261-4189_3_463
 2000_19_0950-9232_10_1257
 2000_19_0950-9232_18_2179
 2000_19_0950-9232_53_6159
 2000_1_1471-0072_3_179
 2000_20_0270-7306_12_4288
 2000_20_0270-7306_23_9076
 2000_20_0270-7306_7_2358
 2000_275_0021-9258_11_7803
 2000_275_0021-9258_30_23106
 2000_275_0021-9258_38_29767
 2000_287_0036-8075_5459_1824
 2000_28_0305-1048_5_1183
 2000_28_0305-1048_5_1183
 2000_34_0066-4197__1
 2000_355_0140-6736_9221_2090
 2000_37_0950-382X_4_952
 2000_405_0028-0836_6785_473
 2000_40_0362-1642__617
 2000_462_1383-5742_2-3_167
 2000_466_0014-5793_1_91
 2000_485_0014-5793_1_35
 2000_57_0003-9942_8_1129
 2000_57_0167-8140_2_143
 2000_5_1097-2765_3_435
 2000_5_1356-9597_7_525
 2000_60_0008-5472_17_4689
 2000_60_0008-5472_17_4881
 2000_60_0008-5472_22_6346
 2000_6_1078-0432_9_3536
 2000_6_1097-2765_3_649
 2000_6_1097-2765_5_1169
 2000_70_1096-7192_2_122
 2000_96_0306-4522_3_575
 2000_97_0027-8424_22_11936
 2000_97_0027-8424_22_11936
 2001_12_1059-1524_10_2987
 2001_13_1040-8746_6_484
 2001_14_0893-228X_3_243
 2001_153_0021-9525_3_613
 2001_15_0890-9369_13_1674
 2001_20_0950-9232_1_113
 2001_20_0950-9232_32_4281
 2001_20_0950-9232_32_4393
 2001_20_0950-9232_39_5503
 2001_20_0950-9232_3_278
 2001_21_0270-7306_10_3398
 2001_21_0270-7306_4_1164
 2001_21_0270-7306_5_1719
 2001_21_0270-7306_8_2755
 2001_22_0143-3334_12_2005
 2001_264_0014-4827_1_67
 2001_276_0021-9258_14_10641
 2001_276_0021-9258_19_16580
 2001_276_0021-9258_21_17914
 2001_276_0021-9258_31_29282
 2001_276_0021-9258_3_1998
 2001_276_0021-9258_46_43305
 2001_276_0021-9258_48_45201
 2001_276_0021-9258_7_4828
 2001_276_0021-9258_7_5296
 2001_280_0006-291X_3_861
 2001_287_0042-6822_2_359
 2001_39_0041-0101_11_1729
 2001_410_0028-0836_6830_842
 2001_41_0362-1642__367
 2001_508_0014-5793_3_394
 2001_61_0008-5472_15_5718
 2001_61_0008-5472_15_5843
 2001_61_0008-5472_22_8211
 2001_61_0008-5472_7_3188
 2001_65_1011-1344_2-3_88
 2001_8_1097-2765_5_1117
 2001_98_0027-8424_3_1036
 2001_98_0027-8424_3_1036
 2001_98_0027-8424_3_781
 2001_98_0027-8424_3_781
 2002_109_0092-8674_4_459
 2002_116_0007-1048_2_421
 2002_119_0007-1048_4_956
 2002_12_0959-437X_1_92
 2002_12_0959-437X_1_92
 2002_12_0960-9822_19_1645
 2002_13_1044-9523_2_77
 2002_13_1059-1524_2_480
 2002_16_0890-9369_5_560
 2002_175_0304-3835_1_1
 2002_175_0304-3835_1_1
 2002_181_0304-3835_2_125
 2002_181_0304-3835_2_125
 2002_1_1568-7864_3_175
 2002_21_0261-4189_6_1447
 2002_21_0261-4189_6_1447
 2002_21_0950-9232_43_6633
 2002_22_0270-7306_18_6521
 2002_22_0270-7306_4_1049
 2002_23_0143-3334_6_949
 2002_26_0145-2126_11_985
 2002_277_0021-9258_2_1599
 2002_277_0021-9258_41_38222
 2002_277_0021-9258_42_39655
 2002_277_0021-9258_44_41756
 2002_277_0021-9258_5_3124
 2002_277_0021-9258_9_7420
 2002_296_0006-291X_1_62
 2002_30_0305-1048_3_643
 2002_30_0305-1048_3_643
 2002_30_1061-4036_3_285
 2002_31_1061-4036_1_55
 2002_36_0066-4197__617
 2002_3_1469-221X_4_341
 2002_3_1469-221X_4_341
 2002_4_1465-7392_12_993
 2002_511_1383-5742_2_145
 2002_62_0008-5472_16_4588
 2002_99_0027-8424_17_11305
 2002_99_0027-8424_17_11305
 2003_100_0027-8424_11_6628
 2003_100_0027-8424_11_6628
 2003_10_0929-1903_11_803
 2003_10_0929-1903_12_926
 2003_12_1055-9965_8_733
 2003_12_1097-2765_6_1511
 2003_13_0960-9822_12_1047
 2003_14_1059-1524_10_4003
 2003_14_1059-1524_12_5116
 2003_159_0033-7587_1_72
 2003_159_0033-7587_2_139
 2003_164_0016-6731_2_589
 2003_17_0890-9369_24_3062
 2003_17_0890-9369_5_615
 2003_1_1541-7786_9_674
 2003_22_0261-4189_3_713
 2003_22_0261-4189_3_713
 2003_22_0261-4189_7_1676
 2003_22_0261-4189_7_1676
 2003_22_0950-9232_14_2110
 2003_22_0950-9232_24_3721
 2003_22_0950-9232_2_220
 2003_22_0950-9232_37_5774
 2003_22_0950-9232_37_5834
 2003_22_0950-9232_40_6119
 2003_23_0270-7306_10_3405
 2003_23_0270-7306_22_8161
 2003_278_0021-9258_20_17885
 2003_278_0021-9258_29_26620
 2003_278_0021-9258_32_30057
 2003_278_0021-9258_33_30421
 2003_278_0021-9258_38_36163
 2003_278_0021-9258_39_37139
 2003_278_0021-9258_39_37736
 2003_278_0021-9258_3_2015
 2003_278_0021-9258_43_42346
 2003_278_0021-9258_44_42812
 2003_3_1535-6108_3_247
 2003_421_0028-0836_6926_957
 2003_421_0028-0836_6926_961
 2003_42_0309-0167_3_217
 2003_4_1469-221X_7_671
 2003_4_1469-221X_7_671
 2003_532_0027-5107_1-2_75
 2003_545_0014-5793_2-3_209
 2003_63_0008-5472_1_31
 2003_63_0008-5472_1_52
 2003_88_0730-2312_1_95
 2004_101_0027-8424_17_6484
 2004_101_0027-8424_17_6484
 2004_110_0009-7322_19_3136
 2004_111_0020-7136_4_543
 2004_117_0021-9533_14_3011
 2004_11_1350-9047_1_21
 2004_130_0171-5216_4_225
 2004_14_0960-9822_15_1341
 2004_15_1059-1524_4_1680
 2004_1688_0925-4439_2_137
 2004_18_0890-9369_24_3041
 2004_18_0890-9369_3_261
 2004_23_0167-7659_3-4_209
 2004_23_0261-4189_13_2554
 2004_23_0261-4189_16_3386
 2004_23_0261-4189_18_3689
 2004_23_0950-9232_16_2797
 2004_23_0950-9232_52_8411
 2004_23_0950-9232_52_8535
 2004_23_0950-9232_7_1342
 2004_24_0270-7306_14_6350
 2004_24_0270-7306_16_7235
 2004_24_0270-7306_7_2779
 2004_279_0021-9258_15_15505
 2004_279_0021-9258_18_18641
 2004_279_0021-9258_24_25813
 2004_279_0021-9258_30_31251
 2004_279_0021-9258_46_47652
 2004_279_0021-9258_49_50986
 2004_317_0006-291X_3_817
 2004_323_0006-291X_3_906
 2004_35_0046-8177_2_165
 2004_36_0891-5849_8_1043
 2004_37_0022-2828_3_633
 2004_38_0065-227X__21
 2004_3_1568-7864_8-9_1025
 2004_3_1568-7864_8-9_1057
 2004_58_0360-3016_2_453
 2004_59_0360-3016_4_928
 2004_67_0006-2952_4_717
 2004_6_1465-7392_7_576
 2004_90_0007-0920_4_888
 2004_96_0248-4900_7_509
 2005_15_1088-9051_2_195
 2005_18_1097-2765_5_577
 2005_24_0950-9232_18_3020
 2005_24_0950-9232_23_3786
 2005_331_0006-291X_1_247
 2005_4_1474-1776_4_307
 2005_54_1383-5769_1_21
 2005_579_0014-5793_17_3683
 
	Citances for PMID: 10523506
 2001_159_0016-6731_2_471
 2002_160_0016-6731_4_1305
 2004_24_0270-7306_17_7419
 2004_9_1356-9597_11_1069
 2004_9_1356-9597_11_1069
 
	Citances for PMID: 9278512
 1997_277_0036-8075_5331_1501
 1999_10_1059-1524_11_3607
 1999_10_1059-1524_8_2703
 1999_10_1059-1524_9_2905
 1999_13_0890-9369_19_2581
 1999_146_0021-9525_3_573
 1999_147_0021-9525_2_295
 1999_18_0261-4189_20_5559
 1999_18_0261-4189_20_5559
 1999_18_0950-9232_37_5159
 1999_18_0950-9232_44_6029
 1999_18_0950-9232_45_6145
 1999_18_0950-9232_46_6296
 1999_18_0950-9232_48_6707
 1999_18_0950-9232_53_7706
 1999_19_0270-7306_9_5872
 1999_1_1465-7392_3_E73
 1999_212_0012-1606_2_381
 1999_213_0012-1606_1_54
 1999_274_0021-9258_35_24865
 1999_274_0021-9258_44_31463
 1999_274_0021-9258_45_32085
 1999_274_0021-9258_47_33571
 1999_274_0021-9258_51_36544
 1999_38_0006-2960_37_12159
 1999_38_0006-2960_38_12499
 1999_38_0006-2960_47_15673
 1999_457_0014-5793_1_23
 1999_460_0014-5793_3_411
 1999_461_0014-5793_3_299
 1999_4_1097-2765_2_153
 1999_59_0008-5472_17_4375
 1999_59_0008-5472_23_5887
 1999_73_0022-538X_12_10010
 1999_73_0022-538X_12_10010
 1999_96_0027-8424_20_11352
 1999_96_0027-8424_20_11352
 1999_9_0960-9822_16_919
 2000_100_0092-8674_6_681
 2000_110_0007-1048_4_819
 2000_11_1043-1802_6_762
 2000_11_1044-9523_4_211
 2000_11_1059-1524_9_3101
 2000_12_0898-6568_11-12_703
 2000_14_0890-9369_9_1027
 2000_155_0016-6731_1_159
 2000_166_0041-008X_2_69
 2000_19_0261-4189_11_2652
 2000_19_0261-4189_11_2652
 2000_19_0261-4189_24_6778
 2000_19_0261-4189_24_6778
 2000_19_0261-4189_3_349
 2000_19_0261-4189_3_349
 2000_19_0950-9232_10_1257
 2000_19_0950-9232_39_4480
 2000_19_0950-9232_56_6607
 2000_1_1471-0072_3_179
 2000_20_0270-7306_12_4288
 2000_20_0270-7306_13_4888
 2000_20_0270-7306_21_7853
 2000_20_0270-7306_2_702
 2000_257_0014-4827_1_206
 2000_260_0378-1119_1-2_133
 2000_267_0014-2956_9_2680
 2000_275_0021-9258_25_19375
 2000_275_0021-9258_28_21661
 2000_275_0021-9258_30_23106
 2000_275_0021-9258_33_25247
 2000_275_0021-9258_37_28849
 2000_275_0021-9258_38_29767
 2000_275_0021-9258_38_29772
 2000_275_0021-9258_39_30638
 2000_288_0036-8075_5470_1425
 2000_29_0340-2096_5_313
 2000_2_1465-7392_9_609
 2000_2_1465-7392_9_672
 2000_37_0950-382X_4_952
 2000_40_0362-1642__617
 2000_466_0014-5793_1_91
 2000_470_0014-5793_1_77
 2000_472_0014-5793_2-3_254
 2000_5_1356-9597_7_525
 2000_60_0008-5472_16_4353
 2000_60_0008-5472_22_6346
 2000_60_0008-5472_3_542
 2000_63_0888-7543_1_46
 2000_6_1078-0432_12_4859
 2000_74_0022-538X_1_8
 2000_74_0022-538X_1_8
 2000_74_0022-538X_6_2636
 2000_74_0022-538X_6_2636
 2000_80_0730-2312_2_229
 2000_8_0968-0896_2_299
 2001_114_0021-9533_19_3445
 2001_11_0959-437X_1_78
 2001_11_0959-437X_1_78
 2001_11_0960-894X_3_313
 2001_11_0960-9822_1_50
 2001_12_1044-9523_12_581
 2001_12_1059-1524_8_2229
 2001_13_0955-0674_2_131
 2001_13_0955-0674_2_131
 2001_13_1040-4651_11_2483
 2001_13_1040-4651_12_2687
 2001_14_0893-228X_3_243
 2001_155_0033-7587_4_554
 2001_15_0890-9369_11_1361
 2001_20_0950-9232_15_1803
 2001_20_0950-9232_15_1839
 2001_20_0950-9232_32_4393
 2001_20_0950-9232_38_5249
 2001_20_0950-9232_44_6331
 2001_20_0950-9232_5_543
 2001_20_0950-9232_8_921
 2001_21_0270-7306_12_3853
 2001_21_0270-7306_14_4818
 2001_21_0270-7306_5_1499
 2001_21_0270-7306_9_3206
 2001_229_0012-1606_1_250
 2001_22_0143-3334_6_851
 2001_22_0143-3334_8_1257
 2001_268_0014-2956_24_6449
 2001_271_0014-4827_1_142
 2001_276_0021-9258_14_10641
 2001_276_0021-9258_19_16580
 2001_276_0021-9258_1_835
 2001_276_0021-9258_20_17291
 2001_276_0021-9258_21_17914
 2001_276_0021-9258_26_23805
 2001_276_0021-9258_2_1434
 2001_276_0021-9258_31_29282
 2001_276_0021-9258_3_1998
 2001_276_0021-9258_40_37166
 2001_276_0021-9258_46_42971
 2001_276_0021-9258_46_43305
 2001_276_0021-9258_52_48863
 2001_284_0006-291X_3_743
 2001_294_0036-8075_5544_1105
 2001_29_0305-1048_13_2836
 2001_29_0305-1048_13_2836
 2001_29_0305-1048_16_3439
 2001_29_0305-1048_16_3439
 2001_390_0003-9861_1_9
 2001_39_0950-382X_6_1638
 2001_40_0006-2960_13_4077
 2001_410_0028-0836_6830_842
 2001_412_0028-0836_6850_914
 2001_505_0014-5793_2_332
 2001_61_0008-5472_13_5106
 2001_61_0008-5472_15_5843
 2001_61_0008-5472_19_7204
 2001_61_0008-5472_1_76
 2001_61_0008-5472_7_3188
 2001_71_0014-4800_2_156
 2001_71_0888-7543_2_235
 2001_75_0022-538X_16_7429
 2001_75_0022-538X_16_7429
 2001_7_1097-2765_5_1071
 2001_8_1097-2765_5_983
 2001_9_0969-2126_3_R33
 2002_115_0021-9533_23_4555
 2002_116_0007-1048_2_421
 2002_119_0007-1048_4_956
 2002_119_0022-202X_2_513
 2002_12_0959-437X_1_92
 2002_12_0959-437X_1_92
 2002_156_0021-9525_2_249
 2002_156_0021-9525_5_817
 2002_16_0888-8809_3_552
 2002_192_0021-9541_3_327
 2002_19_0749-503X_1_55
 2002_1_1474-1776_12_961
 2002_210_0378-1097_1_61
 2002_21_0261-4189_14_3694
 2002_21_0261-4189_14_3694
 2002_21_0261-4189_21_5911
 2002_21_0261-4189_21_5911
 2002_21_0950-9232_11_1717
 2002_21_0950-9232_43_6633
 2002_21_0950-9232_50_7630
 2002_22_0270-6474_19_8458
 2002_22_0270-7306_20_7105
 2002_24_1043-3074_7_694
 2002_277_0021-9258_23_20535
 2002_277_0021-9258_39_36832
 2002_277_0021-9258_43_40997
 2002_277_0021-9258_44_42334
 2002_277_0021-9258_7_5369
 2002_283_0363-6127_4_F810
 2002_294_0378-1119_1-2_13
 2002_295_0006-291X_2_435
 2002_30_1061-4036_3_285
 2002_36_0066-4197__617
 2002_3_1469-221X_4_341
 2002_3_1469-221X_4_341
 2002_3_1534-5807_5_659
 2002_41_0006-2960_17_5566
 2002_513_0014-5793_1_53
 2002_528_0014-5793_1-3_267
 2002_62_0008-5472_12_3562
 2002_62_0008-5472_1_241
 2002_62_0026-895X_3_680
 2002_66_1092-2172_3_407
 2002_76_0022-538X_6_2585
 2002_76_0022-538X_6_2585
 2002_99_0027-8424_1_184
 2002_99_0027-8424_1_184
 2002_99_0027-8424_23_14795
 2002_99_0027-8424_23_14795
 2002_99_0027-8424_26_16794
 2002_99_0027-8424_26_16794
 2002_99_0027-8424_7_4373
 2002_99_0027-8424_7_4373
 2003_10_0929-1903_11_803
 2003_10_0969-7128_23_1961
 2003_116_0021-9533_24_4883
 2003_14_0959-4973_6_449
 2003_14_1043-1802_2_368
 2003_14_1059-1524_10_4003
 2003_14_1059-1524_7_2984
 2003_159_0033-7587_1_72
 2003_159_0033-7587_2_139
 2003_15_0898-6568_7_667
 2003_15_0898-6568_7_709
 2003_165_0016-6731_4_1717
 2003_17_0890-9369_24_3062
 2003_193_0300-483X_1-2_3
 2003_218_0032-0935_1_50
 2003_22_0261-4189_15_3992
 2003_22_0261-4189_15_3992
 2003_22_0261-4189_17_4431
 2003_22_0261-4189_17_4431
 2003_22_0261-4189_19_5208
 2003_22_0261-4189_19_5208
 2003_22_0261-4189_21_5734
 2003_22_0261-4189_21_5734
 2003_22_0261-4189_5_987
 2003_22_0261-4189_5_987
 2003_22_0721-7595_2_195
 2003_22_0950-9232_12_1822
 2003_22_0950-9232_32_4933
 2003_22_0950-9232_37_5774
 2003_22_0950-9232_37_5834
 2003_22_0950-9232_40_6119
 2003_23_0270-7306_17_6013
 2003_23_0270-7306_21_7488
 2003_278_0021-9258_15_12722
 2003_278_0021-9258_20_17609
 2003_278_0021-9258_24_21767
 2003_278_0021-9258_28_25651
 2003_278_0021-9258_31_28580
 2003_278_0021-9258_32_29824
 2003_278_0021-9258_32_29940
 2003_278_0021-9258_34_31838
 2003_278_0021-9258_3_1443
 2003_278_0021-9258_44_42812
 2003_304_0006-291X_2_339
 2003_36_0960-7722_3_131
 2003_3_1474-175X_12_931
 2003_42_0006-2960_34_10060
 2003_4_1469-221X_7_671
 2003_4_1469-221X_7_671
 2003_51_0344-5704_4_337
 2003_532_0027-5107_1-2_85
 2003_5_1465-7392_2_161
 2003_5_1465-7392_5_401
 2003_5_1465-7392_6_545
 2003_63_0008-5472_14_4074
 2003_77_0022-538X_2_1257
 2003_77_0022-538X_2_1257
 2003_85_0006-3495_6_3600
 2003_88_0007-0920_3_455
 2003_88_0730-2312_1_95
 2003_89_0007-0920_8_1479
 2003_89_0730-2312_1_19
 2003_8_1356-9597_5_423
 2003_8_1359-6446_17_793
 2003_94_8750-7587_5_2068
 2004_101_0027-8424_33_12288
 2004_101_0027-8424_33_12288
 2004_101_0027-8424_40_14443
 2004_101_0027-8424_40_14443
 2004_112_0020-7136_5_760
 2004_117_0021-9533_10_1875
 2004_117_0021-9533_14_3011
 2004_117_0021-9533_21_4979
 2004_117_0021-9533_8_1411
 2004_11_1350-9047_1_21
 2004_15_1097-2765_6_977
 2004_162_0033-7587_6_623
 2004_1693_0167-4889_1_47
 2004_16_1040-4651_10_2641
 2004_22_1087-0156_8_993
 2004_23_0167-7659_3-4_209
 2004_23_0261-4189_16_3386
 2004_23_0950-9232_16_2825
 2004_23_0950-9232_20_3700
 2004_23_0950-9232_25_4353
 2004_279_0021-9258_10_8808
 2004_279_0021-9258_24_25813
 2004_279_0021-9258_31_32046
 2004_279_0021-9258_33_34353
 2004_279_0021-9258_46_47652
 2004_279_0021-9258_50_52191
 2004_286_1040-0605_1_L87
 2004_28_0145-305X_7-8_727
 2004_28_0145-305X_7-8_727
 2004_28_0145-305X_7-8_727
 2004_294_0014-4827_2_581
 2004_320_0006-291X_3_773
 2004_37_0022-2828_3_633
 2004_38_1046-5928_1_84
 2004_3_1568-7864_8-9_1025
 2004_555_0027-5107_1-2_121
 2004_558_0014-5793_1-3_57
 2004_560_0014-5793_1-3_7
 2004_58_0360-3016_2_453
 2004_66_0085-2538_2_509
 2004_67_0006-2952_4_717
 2004_6_1465-7392_10_968
 2004_78_0022-538X_3_1464
 2004_78_0022-538X_3_1464
 2004_7_1534-5807_2_275
 2004_88_0022-3042_5_1114
 2004_91_0730-2312_2_223
 2004_96_0248-4900_3_193
 2005_115_0020-7136_4_528
 2005_118_0021-9533_1_39
 2005_12_0929-1903_3_238
 2005_17_1097-2765_1_37
 2005_17_1097-2765_1_49
 2005_232_1058-8388_1_98
 2005_24_0950-9232_13_2175
 2005_24_0950-9232_20_3285
 2005_24_0950-9232_2_299
 2005_24_0950-9232_8_1403
 2005_25_0270-7306_13_5725
 2005_25_0270-7306_2_563
 2005_25_0270-7306_7_2853
 2005_280_0021-9258_19_18891
 2005_280_0021-9258_21_20651
 2005_304_0014-4827_1_1
 2005_331_0006-291X_4_1503
 2005_43_0899-1987_1_1
 2005_4_1474-1776_4_307
 2005_61_0360-3016_3_915
 2005_79_0022-538X_5_2780
 2005_94_0730-2312_2_298
 
	Citances for PMID: 9923681
 1999_10_1059-1524_4_833
 1999_10_1059-1524_9_2905
 1999_13_0890-9369_22_2905
 1999_13_0890-9369_9_1067
 1999_146_0021-9525_3_573
 1999_147_0021-9525_2_295
 1999_18_0261-4189_20_5559
 1999_18_0261-4189_20_5559
 1999_18_0261-4189_8_2174
 1999_18_0261-4189_8_2174
 1999_18_0950-9232_44_6029
 1999_18_0950-9232_45_6129
 1999_18_0950-9232_48_6707
 1999_19_0270-7306_6_4262
 1999_19_0270-7306_6_4465
 1999_1_1465-7392_3_E73
 1999_251_0014-4827_2_372
 1999_274_0021-9258_35_24865
 1999_286_0036-8075_5449_2528
 1999_38_0006-2960_38_12499
 1999_38_0006-2960_40_13085
 1999_4_1097-2765_2_153
 1999_4_1097-2765_5_805
 1999_59_0008-5472_23_5887
 1999_60_0888-7543_2_241
 1999_77_0946-2716_9_656
 1999_96_0027-8424_20_11352
 1999_96_0027-8424_20_11352
 1999_98_0092-8674_4_501
 1999_9_0960-9822_16_919
 1999_9_0960-9822_23_1427
 2000_100_0092-8674_6_681
 2000_10_0962-8924_7_296
 2000_11_1044-9523_4_211
 2000_129_1047-8477_2-3_144
 2000_12_0898-6568_11-12_703
 2000_1471_0304-419X_1_M31
 2000_14_0887-6924_11_1892
 2000_14_0890-9369_6_666
 2000_150_0021-9525_5_963
 2000_155_0016-6731_1_159
 2000_155_0016-6731_2_623
 2000_19_0261-4189_12_2869
 2000_19_0261-4189_12_2869
 2000_19_0261-4189_12_3142
 2000_19_0261-4189_12_3142
 2000_19_0261-4189_20_5483
 2000_19_0261-4189_20_5483
 2000_19_0261-4189_3_349
 2000_19_0261-4189_3_349
 2000_19_0950-9232_10_1257
 2000_19_0950-9232_18_2179
 2000_19_0950-9232_39_4480
 2000_19_0950-9232_56_6607
 2000_1_1469-221X_1_71
 2000_1_1469-221X_1_71
 2000_20_0270-7306_12_4288
 2000_20_0270-7306_13_4888
 2000_20_0270-7306_21_7853
 2000_20_0270-7306_2_702
 2000_20_0270-7306_4_1254
 2000_257_0014-4827_1_206
 2000_275_0021-9258_18_13948
 2000_275_0021-9258_20_14969
 2000_275_0021-9258_25_19375
 2000_275_0021-9258_30_23106
 2000_275_0021-9258_37_28849
 2000_275_0021-9258_38_29767
 2000_275_0021-9258_38_29772
 2000_275_0021-9258_39_30638
 2000_275_0021-9258_41_31921
 2000_275_0021-9258_50_39296
 2000_2_1465-7392_6_E107
 2000_2_1465-7392_9_609
 2000_36_0959-8049_9_1149
 2000_3_1369-5266_5_400
 2000_40_0362-1642__617
 2000_466_0014-5793_1_91
 2000_472_0014-5793_2-3_254
 2000_52_0031-6997_4_477
 2000_57_0026-895X_3_453
 2000_60_0008-5472_16_4353
 2000_75_0022-3042_6_2511
 2000_92_0248-4900_3-4_245
 2000_97_0027-8424_14_7835
 2000_97_0027-8424_14_7835
 2000_97_0027-8424_7_3224
 2000_97_0027-8424_7_3224
 2001_114_0021-9533_19_3445
 2001_11_0959-437X_1_78
 2001_11_0959-437X_1_78
 2001_11_0960-9822_1_50
 2001_12_1059-1524_1_115
 2001_13_0955-0674_2_131
 2001_13_0955-0674_2_131
 2001_13_1040-4651_11_2483
 2001_13_1040-4651_12_2687
 2001_14_0893-228X_3_243
 2001_1547_0167-4838_2_313
 2001_20_0950-9232_15_1803
 2001_20_0950-9232_15_1839
 2001_20_0950-9232_32_4393
 2001_20_0950-9232_38_5249
 2001_20_0950-9232_44_6331
 2001_21_0270-7306_17_5992
 2001_21_0270-7306_23_8056
 2001_21_0270-7306_5_1499
 2001_229_0012-1606_1_250
 2001_276_0021-9258_13_10284
 2001_276_0021-9258_14_10641
 2001_276_0021-9258_16_13402
 2001_276_0021-9258_1_835
 2001_276_0021-9258_3_1998
 2001_276_0021-9258_40_37166
 2001_276_0021-9258_46_42971
 2001_276_0021-9258_50_47496
 2001_287_0042-6822_2_359
 2001_312_0009-8981_1-2_97
 2001_390_0003-9861_1_9
 2001_44_0022-2623_5_834
 2001_498_0014-5793_2-3_157
 2001_52_0022-0957_361_1615
 2001_61_0008-5472_6_2343
 2001_75_0022-538X_16_7429
 2001_75_0022-538X_16_7429
 2001_7_1097-2765_5_1071
 2001_98_0027-8424_18_10148
 2001_98_0027-8424_18_10148
 2001_98_0027-8424_20_11289
 2001_98_0027-8424_20_11289
 2001_9_0969-2126_3_R33
 2002_108_0092-8674_4_513
 2002_116_0007-1048_2_421
 2002_119_0007-1048_4_956
 2002_129_0950-1991_9_2155
 2002_12_0959-437X_1_92
 2002_12_0959-437X_1_92
 2002_12_0960-9822_2_141
 2002_16_0888-8809_3_552
 2002_18_0168-9525_9_479
 2002_210_0378-1097_1_61
 2002_21_0950-9232_11_1717
 2002_21_0950-9232_54_8310
 2002_22_0270-7306_20_7105
 2002_22_0270-7306_24_8514
 2002_277_0021-9258_43_40997
 2002_277_0021-9258_5_3061
 2002_283_0363-6127_4_F810
 2002_30_1061-4036_3_285
 2002_35_1087-1845_3_183
 2002_528_0014-5793_1-3_267
 2002_62_0008-5472_1_241
 2002_76_0022-538X_19_9806
 2002_76_0022-538X_19_9806
 2002_76_0022-538X_6_2585
 2002_76_0022-538X_6_2585
 2002_9_1074-5521_7_821
 2003_14_1059-1524_10_4003
 2003_15_0898-6568_7_709
 2003_165_0016-6731_4_1717
 2003_218_0032-0935_1_50
 2003_22_0261-4189_3_713
 2003_22_0261-4189_3_713
 2003_22_0950-9232_51_8283
 2003_23_0270-7306_16_5939
 2003_23_0270-7306_17_6013
 2003_23_0270-7306_20_7096
 2003_23_0270-7306_9_3253
 2003_278_0021-9258_28_25651
 2003_278_0021-9258_44_42812
 2003_278_0021-9258_46_45460
 2003_3_1474-175X_12_931
 2003_42_0006-2960_51_15264
 2003_4_1469-221X_7_671
 2003_4_1469-221X_7_671
 2003_73_0741-5400_6_689
 2003_8_1356-9597_4_341
 2003_8_1356-9597_5_423
 2003_94_8750-7587_5_2068
 2004_117_0021-9533_12_2461
 2004_117_0021-9533_8_1411
 2004_117_0092-8674_1_95
 2004_13_0964-6906_14_1505
 2004_15_1059-1524_11_4866
 2004_15_1059-1524_1_71
 2004_167_0016-6731_1_77
 2004_1693_0167-4889_1_47
 2004_17_0893-3952_7_803
 2004_234_0378-1097_1_19
 2004_23_0167-7659_3-4_209
 2004_23_0261-4189_16_3386
 2004_23_0261-4189_4_919
 2004_23_0261-4189_9_1934
 2004_24_0270-7306_14_6215
 2004_279_0021-9258_31_32046
 2004_34_0965-1748_1_51
 2004_37_0022-2828_3_633
 2004_40_0959-8049_17_2550
 2005_146_0013-7227_7_3133
 2005_17_1097-2765_1_49
 2005_202_0021-9541_1_285
 2005_35_1046-2023_2_139
 2005_43_0899-1987_1_1
 2005_4_1474-1776_4_307
 2005_79_0022-538X_5_2780
 
	Citances for PMID: 10523629
 2000_10_0962-8924_7_296
 2000_12_0898-6568_11-12_703
 2000_14_0890-9369_9_1027
 2000_20_0270-7306_21_7853
 2000_275_0021-9258_38_29767
 2000_3_1369-5266_5_400
 2000_40_0362-1642__617
 2000_97_0027-8424_14_7835
 2000_97_0027-8424_14_7835
 2001_114_0021-9533_14_2649
 2001_11_0959-437X_1_78
 2001_11_0959-437X_1_78
 2001_11_0960-9822_1_50
 2001_11_0962-8924_12_504
 2001_13_0955-0674_2_131
 2001_13_0955-0674_2_131
 2001_15_0888-8809_4_501
 2001_18_0749-503X_10_889
 2001_20_0950-9232_15_1839
 2001_20_0950-9232_32_4393
 2001_21_0270-7306_12_3853
 2001_21_0270-7306_5_1499
 2001_229_0012-1606_1_250
 2001_276_0021-9258_1_835
 2001_276_0021-9258_21_17914
 2001_276_0021-9258_40_37166
 2001_276_0021-9258_46_42971
 2001_9_0969-2126_3_R33
 2002_12_0960-9822_2_141
 2002_156_0021-9525_5_817
 2002_162_0016-6731_2_689
 2002_19_0749-503X_13_1139
 2002_22_0270-7306_20_7105
 2002_277_0021-9258_20_18029
 2002_3_1469-221X_4_341
 2002_3_1469-221X_4_341
 2002_528_0014-5793_1-3_267
 2002_62_0008-5472_1_271
 2002_99_0027-8424_23_14795
 2002_99_0027-8424_23_14795
 2003_116_0021-9533_2_259
 2003_17_0890-9369_24_3062
 2003_218_0032-0935_1_50
 2003_22_0950-9232_51_8283
 2003_23_0270-7306_21_7488
 2003_278_0021-9258_31_28580
 2003_3_1474-175X_12_931
 2003_4_1469-221X_7_671
 2003_4_1469-221X_7_671
 2003_5_1465-7392_6_545
 2003_89_0007-0920_8_1479
 2004_316_0006-291X_1_226
 2004_33_1046-2023_3_226
 2004_37_0022-2828_3_633
 2005_118_0021-9533_1_39
 2005_146_0013-7227_7_3133
 2005_16_1059-1524_4_1735
 2005_17_1097-2765_1_49
 2005_43_0899-1987_1_1
 2005_79_0022-538X_5_2780
 
	Citances for PMID: 11095689
 2001_159_0016-6731_2_471
 2001_21_0270-7306_10_3514
 2003_100_0027-8424_5_2334
 2003_100_0027-8424_5_2334
 2003_278_0021-9258_9_7397
 2004_101_0027-8424_27_10078
 2004_101_0027-8424_27_10078
 2004_16_1097-2765_2_173
 2004_23_0950-9232_37_6250
 2004_340_0022-2836_2_195
 2005_280_0021-9258_23_22343
 
	Citances for PMID: 10660590
 2001_276_0021-9258_18_15415
 2001_276_0021-9258_7_4699
 2003_190_0304-3835_1_89
 2003_190_0304-3835_1_89
 2004_101_0027-8424_17_6478
 2004_101_0027-8424_17_6478
 2004_18_0890-9369_9_981
 
	Citances for PMID: 7850420
 1994_4_0960-9822_10_876
 1994_4_0960-9822_12_1062
 1995_15_0270-7306_5_2612
 1995_270_0021-9258_12_6843
 1995_270_0021-9258_30_18165
 1995_377_0014-5793_3_295
 1995_5_0960-9822_3_275
 1995_77_0300-9084_10_808
 1995_92_0027-8424_22_10187
 1995_92_0027-8424_22_10187
 1996_24_0305-1048_9_1727
 1996_24_0305-1048_9_1727
 1996_271_0021-9258_22_13283
 1996_271_0021-9258_44_27847
 1996_271_0021-9258_49_31627
 1996_6_0960-9822_2_189
 1996_84_0092-8674_1_73
 1996_87_0092-8674_7_1225
 1997_16_0261-4189_17_5322
 1997_16_0261-4189_17_5322
 1997_188_0012-1606_2_312
 1998_200_0012-1606_2_182
 1998_273_0021-9258_32_20243
 1999_13_0890-9369_17_2242
 1999_96_0027-8424_6_2817
 1999_96_0027-8424_6_2817
 2000_14_0890-9369_20_2570
 2000_5_1356-9597_10_839
 2000_6_1097-2765_3_649
 2001_128_0950-1991_19_3795
 2001_152_0021-9525_5_985
 2001_21_0270-7306_8_2956
 2001_265_0014-4827_2_242
 2003_104_0301-4622_3_573
 2003_22_0261-4189_10_2526
 2003_22_0261-4189_10_2526
 2004_117_0021-9533_25_6019
 2004_14_0960-9822_17_1598
 2004_18_0890-9369_22_2699
 2005_24_0950-9232_17_2787
 
	Citances for PMID: 9733514
 1998_281_0036-8075_5383_1674
 2000_103_0092-8674_6_897
 2000_161_0304-3835_2_141
 2000_161_0304-3835_2_141
 2000_19_0950-9232_49_5643
 2000_19_0950-9232_52_5955
 2000_19_0950-9232_54_6185
 2000_19_0950-9232_54_6194
 2000_19_0950-9232_54_6203
 2000_1_1471-0072_3_179
 2000_275_0021-9258_46_35778
 2000_275_0021-9258_51_39944
 2000_2_1465-7392_12_893
 2000_457_0027-5107_1-2_113
 2000_60_0008-5472_22_6346
 2000_6_1078-0432_12_4859
 2000_75_0165-2478_1_15
 2000_97_0027-8424_25_13749
 2000_97_0027-8424_25_13749
 2001_114_0021-9533_20_3591
 2001_11_0959-437X_1_71
 2001_11_0959-437X_1_71
 2001_11_0960-894X_21_2837
 2001_11_0960-9822_12_962
 2001_123_0009-9104_3_472
 2001_12_1059-1524_5_1315
 2001_130_1095-6433_3_411
 2001_13_0955-0674_2_225
 2001_13_0955-0674_2_225
 2001_1471_0304-419X_2_M63
 2001_14_0893-228X_3_243
 2001_14_1521-6926_3_631
 2001_153_0021-9525_2_367
 2001_1551_0304-419X_2_F1
 2001_155_0033-7587_1_201
 2001_15_0890-9369_14_1833
 2001_15_0890-9369_9_1067
 2001_174_0304-3835_1_1
 2001_174_0304-3835_1_1
 2001_20_0261-4189_4_914
 2001_20_0261-4189_4_914
 2001_20_0261-4189_7_1630
 2001_20_0261-4189_7_1630
 2001_20_0950-9232_1_113
 2001_20_0950-9232_26_3341
 2001_20_0950-9232_30_4029
 2001_20_0950-9232_42_5964
 2001_20_0950-9232_6_748
 2001_20_0950-9232_9_1076
 2001_21_0270-6474_17_6687
 2001_21_0270-7306_10_3375
 2001_21_0270-7306_10_3398
 2001_21_0270-7306_12_4046
 2001_21_0270-7306_3_755
 2001_21_0270-7306_4_1164
 2001_21_0270-7306_8_2743
 2001_229_0012-1606_1_250
 2001_22_0143-3334_12_2023
 2001_22_0143-3334_8_1257
 2001_22_1046-5928_3_462
 2001_262_0014-4827_1_37
 2001_268_0014-2956_10_2764
 2001_268_0014-2956_10_2779
 2001_269_0014-4827_1_64
 2001_272_0378-1119_1-2_35
 2001_276_0021-9258_12_8884
 2001_276_0021-9258_12_8898
 2001_276_0021-9258_15_12449
 2001_276_0021-9258_19_16580
 2001_276_0021-9258_24_21951
 2001_276_0021-9258_28_26453
 2001_276_0021-9258_31_29282
 2001_276_0021-9258_32_30133
 2001_276_0021-9258_34_31819
 2001_276_0021-9258_39_36303
 2001_276_0021-9258_41_38224
 2001_276_0021-9258_42_39115
 2001_276_0021-9258_45_41898
 2001_276_0021-9258_47_44003
 2001_276_0021-9258_7_4699
 2001_276_0021-9258_7_4828
 2001_281_1040-0605_2_L291
 2001_283_0006-291X_5_1135
 2001_284_0006-291X_4_880
 2001_29_0305-1048_24_5207
 2001_29_0305-1048_24_5207
 2001_29_0305-1048_6_1341
 2001_29_0305-1048_6_1341
 2001_30_1056-8700__421
 2001_313_0022-2836_4_711
 2001_3_1465-7392_12_E277
 2001_411_0028-0836_6840_969
 2001_41_0362-1642__261
 2001_490_0014-5793_3_163
 2001_49_0360-3016_2_547
 2001_49_0364-5134_5_627
 2001_50_0360-3016_2_511
 2001_54_0021-9746_7_512
 2001_60_0006-3525_1_61
 2001_61_0008-5472_14_5396
 2001_61_0008-5472_14_5402
 2001_61_0008-5472_1_88
 2001_61_0008-5472_24_8723
 2001_61_0008-5472_2_538
 2001_61_0008-5472_4_1598
 2001_70_0066-4154__535
 2001_75_0022-538X_16_7572
 2001_75_0022-538X_16_7572
 2001_75_0022-538X_20_9844
 2001_75_0022-538X_20_9844
 2001_75_0022-538X_24_12279
 2001_75_0022-538X_24_12279
 2001_7_1097-2765_2_283
 2001_7_1471-4914_12_560
 2001_88_0009-7330_7_733
 2001_8_1097-2765_6_1243
 2001_98_0006-4971_7_2084
 2001_98_0027-8424_17_9671
 2001_98_0027-8424_17_9671
 2001_98_0027-8424_23_13102
 2001_98_0027-8424_23_13102
 2001_98_0027-8424_3_1036
 2001_98_0027-8424_3_1036
 2001_98_0027-8424_3_1188
 2001_98_0027-8424_3_1188
 2001_98_0027-8424_4_1676
 2001_98_0027-8424_4_1676
 2002_109_0092-8674_4_459
 2002_12_0959-437X_1_60
 2002_12_0959-437X_1_60
 2002_158_0033-7587_6_735
 2002_162_0016-6731_1_217
 2002_16_0890-9369_18_2333
 2002_190_0021-9541_3_365
 2002_192_0021-9541_1_1
 2002_21_0261-4189_12_3000
 2002_21_0261-4189_12_3000
 2002_21_0261-4189_19_5195
 2002_21_0261-4189_19_5195
 2002_21_0261-4189_9_2168
 2002_21_0261-4189_9_2168
 2002_21_0950-9232_1_9
 2002_21_0950-9232_21_3475
 2002_21_0950-9232_27_4191
 2002_21_0950-9232_40_6228
 2002_21_0950-9232_46_7100
 2002_21_0950-9232_4_584
 2002_21_0950-9232_51_7776
 2002_21_0950-9232_58_9008
 2002_21_0950-9232_7_1090
 2002_21_0950-9232_7_1108
 2002_22_0270-7306_15_5308
 2002_22_0270-7306_18_6521
 2002_22_0270-7306_24_8552
 2002_22_0270-7306_4_1049
 2002_22_0270-7306_5_1360
 2002_22_0270-7306_6_1834
 2002_22_0270-7306_7_2220
 2002_22_0270-7306_8_2441
 2002_26_0145-2126_11_1011
 2002_276_0014-4827_2_185
 2002_276_0014-4827_2_194
 2002_277_0021-9258_15_12491
 2002_277_0021-9258_15_12710
 2002_277_0021-9258_16_14102
 2002_277_0021-9258_23_20549
 2002_277_0021-9258_36_33501
 2002_277_0021-9258_3_1864
 2002_277_0021-9258_41_38222
 2002_277_0021-9258_45_42943
 2002_277_0021-9258_4_3020
 2002_277_0021-9258_51_50206
 2002_277_0021-9258_5_3124
 2002_277_0021-9258_7_4839
 2002_277_0021-9258_9_7420
 2002_301_0042-6822_1_90
 2002_30_0305-1048_8_1713
 2002_30_0305-1048_8_1713
 2002_32_0014-2972_6_458
 2002_32_0143-4160_1_31
 2002_35_1087-1845_3_183
 2002_36_0066-4197__617
 2002_39_0022-2593_1_57
 2002_42_1040-8428_1_5
 2002_509_0027-5107_1-2_109
 2002_509_0027-5107_1-2_49
 2002_511_1383-5742_2_145
 2002_52_0360-3016_3_606
 2002_52_0360-3016_3_822
 2002_62_0008-5472_10_2883
 2002_62_0008-5472_16_4588
 2002_62_0008-5472_4_1069
 2002_8_1471-4914_4_179
 2002_99_0006-4971_1_238
 2002_99_0027-8424_1_233
 2002_99_0027-8424_1_233
 2002_99_0027-8424_2_925
 2002_99_0027-8424_2_925
 2002_9_1072-0502_4_167
 2003_100_0027-8424_4_1645
 2003_100_0027-8424_4_1645
 2003_101_0006-4971_9_3622
 2003_10_1350-9047_4_468
 2003_11_1097-2765_2_341
 2003_129_0171-5216_12_709
 2003_14_0959-4973_6_449
 2003_159_0033-7587_1_72
 2003_159_0033-7587_2_139
 2003_15_0898-6568_1_95
 2003_15_1040-4651_1_119
 2003_160_0033-7587_3_273
 2003_160_0033-7587_5_549
 2003_17_0892-6638_2_152
 2003_193_0300-483X_1-2_3
 2003_1_1541-7786_10_747
 2003_1_1541-7786_9_674
 2003_22_0261-4189_20_5612
 2003_22_0261-4189_20_5612
 2003_22_0950-9232_22_3431
 2003_22_0950-9232_24_3721
 2003_22_0950-9232_2_161
 2003_22_0950-9232_37_5813
 2003_22_0950-9232_37_5834
 2003_22_0950-9232_38_5958
 2003_22_0950-9232_39_7905
 2003_22_0950-9232_41_6332
 2003_22_0950-9232_55_8870
 2003_23_0270-7306_20_7256
 2003_23_0270-7306_9_3287
 2003_278_0021-9258_11_9309
 2003_278_0021-9258_14_11879
 2003_278_0021-9258_15_12650
 2003_278_0021-9258_1_48
 2003_278_0021-9258_20_17885
 2003_278_0021-9258_21_18914
 2003_278_0021-9258_28_26031
 2003_278_0021-9258_32_29940
 2003_278_0021-9258_39_37139
 2003_278_0021-9258_39_37782
 2003_278_0021-9258_3_2066
 2003_278_0021-9258_41_39527
 2003_278_0021-9258_42_41028
 2003_28_0968-0004_7_346
 2003_2_1535-7163_6_517
 2003_2_1568-7864_9_971
 2003_303_0006-291X_2_399
 2003_305_0006-291X_4_950
 2003_308_0006-291X_4_802
 2003_31_0305-1048_6_1715
 2003_31_0305-1048_6_1715
 2003_33_1061-4036_2_172
 2003_34_0046-8177_10_1022
 2003_38_1045-2257_2_157
 2003_3_1474-175X_1_23
 2003_3_1474-175X_3_155
 2003_421_0028-0836_6922_499
 2003_424_0028-0836_6948_516
 2003_532_0027-5107_1-2_173
 2003_543_1383-5742_1_31
 2003_63_0008-5472_14_4074
 2003_63_0008-5472_17_5335
 2003_63_0008-5472_18_6008
 2003_63_0008-5472_19_6290
 2003_63_0008-5472_23_8188
 2003_63_0008-5472_5_936
 2003_63_0008-5472_8_1822
 2003_68_0006-3363_2_628
 2003_68_0006-3363_2_628
 2003_68_0006-3363_3_717
 2004_101_0027-8424_11_3933
 2004_101_0027-8424_11_3933
 2004_101_0027-8424_23_8809
 2004_101_0027-8424_23_8809
 2004_101_0027-8424_40_14443
 2004_101_0027-8424_40_14443
 2004_103_0006-4971_1_283
 2004_10_1007-9327_2_155
 2004_113_0009-5915_4_157
 2004_13_0964-6906_18_2155
 2004_13_1097-2765_6_867
 2004_145_0013-7227_12_5679
 2004_14_1097-2765_5_585
 2004_161_0033-7587_3_247
 2004_1688_0925-4439_2_137
 2004_1705_0304-419X_1_3
 2004_18_0890-9369_12_1423
 2004_18_0890-9369_24_3041
 2004_200_0022-1007_9_1111
 2004_23_0261-4189_18_3689
 2004_23_0261-4189_22_4451
 2004_23_0950-9232_10_1911
 2004_23_0950-9232_20_3580
 2004_23_0950-9232_23_4107
 2004_23_0950-9232_29_4984
 2004_23_0950-9232_32_5505
 2004_23_0950-9232_4_873
 2004_23_0950-9232_55_8941
 2004_23_0950-9232_8_1498
 2004_24_0270-7306_14_6268
 2004_24_0270-7306_14_6430
 2004_24_0270-7306_17_7559
 2004_24_0270-7306_17_7654
 2004_24_0270-7306_20_9207
 2004_24_0270-7306_23_10126
 2004_24_0270-7306_3_976
 2004_279_0021-9258_15_15402
 2004_279_0021-9258_24_25549
 2004_279_0021-9258_30_31251
 2004_279_0021-9258_46_47652
 2004_279_0021-9258_51_53272
 2004_286_1040-0605_1_L87
 2004_300_0014-4827_2_354
 2004_317_0006-291X_3_902
 2004_319_0006-291X_2_596
 2004_322_0006-291X_1_74
 2004_337_0022-2836_1_129
 2004_36_1061-4036_1_55
 2004_38_0065-227X__21
 2004_38_0065-227X__97
 2004_3_1568-7864_10_1263
 2004_3_1568-7864_10_1345
 2004_3_1568-7864_11_1493
 2004_3_1568-7864_3_235
 2004_3_1568-7864_4_359
 2004_3_1568-7864_7_753
 2004_3_1568-7864_8-9_1057
 2004_3_1568-7864_8-9_889
 2004_3_1568-7864_8-9_909
 2004_3_1568-7864_8-9_919
 2004_40_0899-1987_1_62
 2004_40_0959-8049_17_2550
 2004_4_1474-175X_10_793
 2004_546_0027-5107_1-2_7
 2004_59_0360-3016_4_928
 2004_67_0006-2952_4_717
 2004_67_0006-2952_7_1373
 2004_70_0006-3363_4_1206
 2004_70_0006-3363_4_1206
 2004_72_0167-8140_3_325
 2004_94_0009-7330_10_1310
 2004_9_1356-9597_2_131
 2004_9_1356-9597_2_131
 2005_102_0027-8424_14_5056
 2005_10_1356-9597_2_97
 2005_124_0022-202X_4_807
 2005_12_1350-9047_6_627
 2005_12_1350-9047_8_1057
 2005_14_0964-6906_2_307
 2005_164_0033-7587_1_17
 2005_16_1059-1524_4_1684
 2005_18_1097-2765_3_283
 2005_18_1097-2765_5_577
 2005_19_0890-9369_10_1162
 2005_24_0950-9232_23_3786
 2005_24_0950-9232_2_267
 2005_26_0143-4004__S87
 2005_280_0021-9258_15_15158
 2005_280_0021-9258_16_16019
 2005_280_0021-9258_19_19166
 2005_280_0021-9258_6_4029
 2005_280_0021-9258_6_4649
 2005_28_0277-3732_1_43
 2005_29_0145-2126_3_307
 2005_302_0014-4827_2_162
 2005_330_0006-291X_2_483
 2005_41_0959-8049_2_206
 2005_44_0006-2960_7_2536
 2005_48_0022-2623_2_569
 2005_579_0014-5793_12_2604
 2005_61_0360-3016_1_196
 2005_64_0306-9877_4_736
 2005_7_1465-7392_5_493
 2005_92_0007-0920_4_784
 
	Citances for PMID: 9925639
 1999_10_1059-1524_8_2703
 1999_11_0955-0674_4_483
 1999_13_0890-9369_2_152
 1999_13_0890-9369_8_916
 1999_152_0016-6731_4_1501
 1999_18_0261-4189_23_6845
 1999_18_0261-4189_23_6845
 1999_18_0261-4189_24_7002
 1999_18_0261-4189_24_7002
 1999_18_0261-4189_7_1815
 1999_18_0261-4189_7_1815
 1999_18_0950-9232_27_3989
 1999_18_0950-9232_45_6145
 1999_18_0950-9232_48_6707
 1999_18_0950-9232_53_7637
 1999_18_0950-9232_53_7656
 1999_261_0006-291X_2_464
 1999_264_0006-291X_3_860
 1999_286_0036-8075_5442_1100
 1999_38_0006-2960_44_14711
 1999_434_0921-8777_1_3
 1999_59_0008-5472_10_2464
 1999_59_0008-5472_17_4375
 1999_59_0008-5472_20_5294
 1999_6_1074-5521_5_R129
 1999_96_0027-8424_22_12384
 1999_96_0027-8424_22_12384
 1999_96_0027-8424_26_14973
 1999_96_0027-8424_26_14973
 2000_10_0960-9822_8_479
 2000_1470_0304-419X_2_M37
 2000_14_0890-9369_4_397
 2000_19_0950-9232_32_3656
 2000_19_0950-9232_45_5163
 2000_19_0950-9232_54_6203
 2000_1_1471-0072_3_179
 2000_20_0270-7306_8_2803
 2000_20_0270-7306_9_3224
 2000_275_0021-9258_27_20444
 2000_275_0021-9258_46_35778
 2000_275_0021-9258_51_39944
 2000_278_0003-2697_1_29
 2000_295_0022-2836_4_853
 2000_2_1465-7392_10_686
 2000_300_0022-2836_3_503
 2000_405_0028-0836_6785_473
 2000_462_1383-5742_2-3_179
 2000_478_0014-5793_1-2_67
 2000_5_1097-2765_6_993
 2000_60_0008-5472_12_3299
 2000_60_0008-5472_6_1711
 2000_60_0008-5472_9_2464
 2000_65_0888-7543_1_24
 2000_97_0027-8424_22_11936
 2000_97_0027-8424_22_11936
 2000_97_0027-8424_25_13749
 2000_97_0027-8424_25_13749
 2000_97_0027-8424_2_889
 2000_97_0027-8424_2_889
 2000_97_0027-8424_4_1584
 2000_97_0027-8424_4_1584
 2001_114_0021-9533_20_3591
 2001_11_0959-437X_1_71
 2001_11_0959-437X_1_71
 2001_11_0960-9822_21_1722
 2001_13_0955-0674_2_225
 2001_13_0955-0674_2_225
 2001_14_0893-228X_3_243
 2001_15_0890-9369_14_1833
 2001_174_0304-3835_1_1
 2001_174_0304-3835_1_1
 2001_20_0261-4189_6_1331
 2001_20_0261-4189_6_1331
 2001_20_0950-9232_15_1803
 2001_20_0950-9232_1_113
 2001_20_0950-9232_32_4281
 2001_20_0950-9232_3_289
 2001_20_0950-9232_42_5964
 2001_20_0950-9232_51_7453
 2001_20_0950-9232_9_1076
 2001_21_0270-6474_17_6687
 2001_22_0143-3334_12_2023
 2001_22_0143-3334_4_573
 2001_22_0143-3334_6_851
 2001_268_0014-2956_10_2764
 2001_268_0014-2956_10_2779
 2001_276_0021-9258_19_16580
 2001_276_0021-9258_20_17276
 2001_276_0021-9258_21_18193
 2001_276_0021-9258_32_30133
 2001_276_0021-9258_39_36303
 2001_276_0021-9258_42_39115
 2001_276_0021-9258_45_41898
 2001_276_0021-9258_46_43305
 2001_276_0021-9258_47_44003
 2001_276_0021-9258_4_2905
 2001_276_0021-9258_7_4699
 2001_276_0021-9258_7_4828
 2001_277_0378-1119_1-2_15
 2001_27_1061-4036_3_247
 2001_280_0006-291X_3_861
 2001_281_1040-0605_2_L291
 2001_283_0006-291X_5_1135
 2001_284_0006-291X_4_880
 2001_28_0340-6997_4_541
 2001_28_1061-4036_3_266
 2001_294_0036-8075_5547_1713
 2001_313_0022-2836_4_711
 2001_3_1465-7392_12_E277
 2001_40_0006-2960_13_4053
 2001_411_0028-0836_6840_969
 2001_41_0362-1642__367
 2001_50_0360-3016_2_511
 2001_61_0008-5472_24_8723
 2001_61_0008-5472_4_1604
 2001_8_1097-2765_1_71
 2001_8_1097-2765_6_1243
 2001_98_0027-8424_16_9092
 2001_98_0027-8424_16_9092
 2001_98_0027-8424_23_13102
 2001_98_0027-8424_23_13102
 2001_98_0027-8424_3_1036
 2001_98_0027-8424_3_1036
 2002_10_0968-0896_1_167
 2002_111_0092-8674_6_779
 2002_1603_0304-419X_1_31
 2002_162_0016-6731_1_217
 2002_16_0890-9369_5_560
 2002_1_1568-7864_10_811
 2002_1_1568-7864_3_175
 2002_21_0261-4189_9_2168
 2002_21_0261-4189_9_2168
 2002_21_0950-9232_1_9
 2002_21_0950-9232_46_7100
 2002_21_0950-9232_4_611
 2002_21_0950-9232_5_849
 2002_21_0950-9232_7_1090
 2002_21_0950-9232_7_1108
 2002_22_0270-7306_16_6014
 2002_22_0270-7306_18_6521
 2002_22_0270-7306_24_8552
 2002_22_0270-7306_5_1360
 2002_23_0143-3334_4_549
 2002_277_0021-9258_15_12491
 2002_277_0021-9258_23_20549
 2002_277_0021-9258_2_1599
 2002_277_0021-9258_3_1837
 2002_277_0021-9258_3_1864
 2002_277_0021-9258_41_38222
 2002_277_0021-9258_4_3020
 2002_277_0021-9258_5_3124
 2002_277_0021-9258_6_4428
 2002_292_0006-291X_2_355
 2002_32_0014-2972_6_458
 2002_39_0022-2593_1_57
 2002_500_0027-5107_1-2_17
 2002_62_0026-895X_1_143
 2002_6_1089-8603_2_125
 2002_7_1356-9597_8_869
 2002_99_0027-8424_10_6673
 2002_99_0027-8424_10_6673
 2002_99_0027-8424_1_233
 2002_99_0027-8424_1_233
 2002_99_0027-8424_5_2818
 2002_99_0027-8424_5_2818
 2003_100_0027-8424_8_4778
 2003_100_0027-8424_8_4778
 2003_101_0006-4971_4_1530
 2003_101_0006-4971_9_3622
 2003_10_1350-9047_4_468
 2003_11_1097-2765_2_341
 2003_129_0171-5216_12_709
 2003_14_0959-4973_6_449
 2003_159_0033-7587_2_139
 2003_15_0898-6568_1_95
 2003_17_0890-9369_5_615
 2003_17_0892-6638_2_152
 2003_22_0261-4189_11_2860
 2003_22_0261-4189_11_2860
 2003_22_0261-4189_20_5622
 2003_22_0261-4189_20_5622
 2003_22_0261-4189_9_2245
 2003_22_0261-4189_9_2245
 2003_22_0950-9232_10_1491
 2003_22_0950-9232_20_3099
 2003_22_0950-9232_24_3721
 2003_22_0950-9232_37_5813
 2003_22_0950-9232_37_5834
 2003_22_0950-9232_38_5927
 2003_22_0950-9232_38_5958
 2003_22_0950-9232_55_8870
 2003_22_0950-9232_56_9063
 2003_278_0021-9258_17_14971
 2003_278_0021-9258_20_17885
 2003_278_0021-9258_21_18914
 2003_278_0021-9258_28_26031
 2003_278_0021-9258_32_29940
 2003_278_0021-9258_41_39527
 2003_284_1040-0605_2_L368
 2003_2_1535-7163_6_517
 2003_2_1568-7864_4_427
 2003_305_0006-291X_4_950
 2003_306_0006-291X_4_954
 2003_308_0006-291X_4_802
 2003_308_0006-291X_4_966
 2003_3_1474-175X_3_155
 2003_543_1383-5742_1_31
 2003_63_0008-5472_18_6008
 2003_63_0008-5472_23_8188
 2003_66_0006-2952_12_2281
 2003_74_1096-6080_1_157
 2003_84_0022-3042_6_1275
 2003_9_1078-0432_8_3204
 2004_101_0027-8424_16_5898
 2004_101_0027-8424_16_5898
 2004_10_1007-9327_2_155
 2004_117_0021-9533_26_6355
 2004_134_0022-3166_10_2705
 2004_14_1097-2765_5_585
 2004_1705_0304-419X_1_3
 2004_18_0890-9369_3_249
 2004_23_0950-9232_10_1911
 2004_23_0950-9232_20_3580
 2004_24_0270-7306_12_5332
 2004_24_0270-7306_14_6268
 2004_24_0270-7306_24_10650
 2004_24_0270-7306_3_1219
 2004_24_0270-7306_3_1279
 2004_24_0270-7306_3_976
 2004_279_0021-9258_47_48836
 2004_279_0021-9258_50_52175
 2004_286_1040-0605_1_L87
 2004_323_0006-291X_4_1197
 2004_36_1061-4036_1_55
 2004_3_1568-7864_8-9_1057
 2004_3_1568-7864_8-9_1141
 2004_3_1568-7864_8-9_1227
 2004_3_1568-7864_8-9_797
 2004_3_1568-7864_8-9_901
 2004_40_0899-1987_1_62
 2004_4_1474-175X_10_793
 2005_10_1356-9597_2_97
 2005_14_0964-6906_12_1699
 2005_16_1059-1524_4_1684
 2005_1724_0304-4165_1-2_49
 2005_19_0890-9369_10_1162
 2005_205_0022-3417_2_221
 2005_24_0950-9232_20_3229
 2005_24_0950-9232_23_3726
 2005_25_0270-7306_6_2463
 2005_25_0270-7306_9_3553
 2005_280_0021-9258_2_1186
 2005_280_0021-9258_9_8156
 2005_29_0145-2126_8_933
 2005_302_0014-4827_2_162
 2005_32_1619-7070_2_229
 2005_331_0006-291X_3_761
 2005_37_1357-2725_2_416
 2005_44_0006-2960_7_2536
 2005_48_0022-2623_2_569
 2005_571_0027-5107_1-2_91
 2005_6_1471-0072_1_44
 2005_77_0741-5400_5_820
 
	Citances for PMID: 10748114
 2001_13_1040-8746_2_129
 2001_21_0270-7306_12_4032
 2001_31_0020-7519_11_1246
 2002_160_0016-6731_4_1305
 2002_277_0021-9258_21_18291
 2002_277_0021-9258_45_42471
 2002_62_0008-5472_4_1123
 2003_278_0021-9258_27_24644
 2003_31_0301-472X_3_251
 2003_59_0008-6363_2_479
 2003_8_1356-9597_2_145
 2003_8_1356-9597_5_413
 2004_146_1047-8477_1-2_234
 2004_24_0270-7306_14_6268
 2004_78_0022-538X_24_13954
 2004_78_0022-538X_24_13954
 2005_328_0006-291X_4_851
 2005_33_0305-1048_9_3033
 
	Citances for PMID: 11069891
 2001_114_0021-9533_18_3397
 2001_11_0960-9822_4_R121
 2001_13_0955-0674_2_225
 2001_13_0955-0674_2_225
 2001_14_0893-228X_3_243
 2001_20_0950-9232_51_7453
 2001_21_0270-7306_10_3398
 2001_276_0021-9258_20_17092
 2001_98_0027-8424_16_9092
 2001_98_0027-8424_16_9092
 2001_98_0027-8424_20_11289
 2001_98_0027-8424_20_11289
 2002_115_0021-9533_23_4555
 2002_12_0962-8924_11_509
 2002_157_0021-9525_1_19
 2002_158_0021-9525_5_863
 2002_16_0890-9369_18_2327
 2002_21_0261-4189_14_3694
 2002_21_0261-4189_14_3694
 2002_22_0270-7306_24_8552
 2002_22_0270-7306_6_1834
 2002_277_0021-9258_30_27088
 2002_277_0021-9258_39_36832
 2002_277_0021-9258_42_39655
 2002_277_0021-9258_6_4428
 2002_297_0036-8075_5581_547
 2002_36_0066-4197__617
 2002_99_0027-8424_10_6673
 2002_99_0027-8424_10_6673
 2002_99_0027-8424_23_14795
 2002_99_0027-8424_23_14795
 2002_9_1097-2765_4_857
 2003_120_0925-4773_3_315
 2003_13_0960-9822_10_819
 2003_13_0960-9822_6_R231
 2003_14_1059-1524_9_3898
 2003_159_0033-7587_2_139
 2003_163_0021-9525_2_245
 2003_17_0890-9369_5_615
 2003_193_0300-483X_1-2_3
 2003_22_0261-4189_3_713
 2003_22_0261-4189_3_713
 2003_22_0950-9232_10_1491
 2003_22_0950-9232_37_5834
 2003_22_0950-9232_40_6119
 2003_22_0950-9232_46_7247
 2003_23_0270-7306_17_6300
 2003_23_0270-7306_3_791
 2003_278_0021-9258_17_14806
 2003_278_0021-9258_17_15208
 2003_278_0021-9258_28_25879
 2003_278_0021-9258_32_30057
 2003_278_0021-9258_39_37139
 2003_278_0021-9258_47_46782
 2003_3_1474-175X_3_155
 2003_3_1535-6108_3_247
 2003_532_0027-5107_1-2_41
 2003_532_0027-5107_1-2_75
 2003_543_1383-5742_1_31
 2003_5_1465-7392_2_161
 2003_63_0008-5472_12_3049
 2003_77_0022-538X_2_1257
 2003_77_0022-538X_2_1257
 2003_8_1356-9597_5_423
 2004_101_0027-8424_17_6484
 2004_101_0027-8424_17_6484
 2004_10_1007-9327_2_155
 2004_117_0021-9533_16_3489
 2004_117_0021-9533_25_6019
 2004_117_0092-8674_5_575
 2004_15_1059-1524_4_1680
 2004_15_1059-1524_9_4051
 2004_165_0021-9525_6_801
 2004_23_0167-7659_3-4_209
 2004_23_0261-4189_16_3386
 2004_23_0261-4189_2_418
 2004_24_0270-7306_15_6701
 2004_24_0270-7306_9_3660
 2004_279_0021-9258_10_8808
 2004_279_0021-9258_11_9677
 2004_279_0021-9258_24_25813
 2004_279_0021-9258_32_34010
 2004_279_0021-9258_48_49599
 2004_297_0014-4827_2_461
 2004_323_0006-291X_4_1197
 2004_3_1568-7864_8-9_1025
 2004_3_1568-7864_8-9_901
 2004_7_1534-5807_2_275
 2005_16_1084-9521_3_355
 2005_17_1097-2765_1_37
 2005_19_0890-9369_9_1040
 2005_25_0270-7306_8_3109
 2005_25_0270-7306_9_3553
 2005_280_0021-9258_2_1186
 2005_304_0014-4827_1_1
 2005_48_0022-2623_13_4332
 2005_7_1535-6108_2_193
 2005_86_0888-7543_2_212
 
	Citances for PMID: 11298456
 2001_13_0955-0674_6_738
 2001_13_1040-8746_6_484
 2001_20_0950-9232_39_5503
 2001_410_0028-0836_6830_842
 2002_100_0006-4971_10_3804
 2002_100_0006-4971_13_4602
 2002_109_0092-8674_4_459
 2002_129_0950-1991_9_2155
 2002_12_0962-8924_3_138
 2002_12_1088-9051_6_969
 2002_16_0890-9369_17_2173
 2002_16_0890-9369_5_560
 2002_1_1474-1776_12_961
 2002_1_1568-7864_3_175
 2002_21_0261-4189_13_3370
 2002_21_0261-4189_13_3370
 2002_21_0261-4189_14_3694
 2002_21_0261-4189_14_3694
 2002_21_0261-4189_18_4875
 2002_21_0261-4189_18_4875
 2002_21_0261-4189_21_5911
 2002_21_0261-4189_21_5911
 2002_21_0950-9232_43_6633
 2002_21_0950-9232_45_6884
 2002_21_0950-9232_56_8591
 2002_21_0950-9232_58_8967
 2002_22_0270-7306_18_6521
 2002_22_0270-7306_21_7459
 2002_22_0270-7306_24_8552
 2002_22_0270-7306_4_1049
 2002_24_1043-3074_7_694
 2002_277_0021-9258_1_746
 2002_277_0021-9258_29_26553
 2002_277_0021-9258_2_1599
 2002_277_0021-9258_6_4428
 2002_277_0021-9258_7_4839
 2002_2_1474-175X_5_351
 2002_36_0066-4197__617
 2002_3_1469-221X_3_248
 2002_3_1469-221X_3_248
 2002_44_1040-8428_3_217
 2002_4_1465-7392_12_998
 2002_513_0014-5793_1_58
 2002_62_0008-5472_16_4588
 2002_62_0008-5472_9_2483
 2002_99_0027-8424_11_7472
 2002_99_0027-8424_11_7472
 2002_99_0027-8424_1_233
 2002_99_0027-8424_1_233
 2002_99_0027-8424_23_14795
 2002_99_0027-8424_23_14795
 2003_100_0027-8424_26_15290
 2003_100_0027-8424_26_15548
 2003_100_0027-8424_26_15548
 2003_111_0903-4641_1_252
 2003_12_1097-2765_6_1511
 2003_14_1059-1524_10_3989
 2003_14_1059-1524_10_4003
 2003_159_0033-7587_2_139
 2003_163_0021-9525_2_245
 2003_17_0890-9369_24_3062
 2003_1_1541-7786_9_674
 2003_22_0261-4189_7_1676
 2003_22_0261-4189_7_1676
 2003_22_0950-9232_10_1491
 2003_22_0950-9232_28_4398
 2003_22_0950-9232_2_220
 2003_22_0950-9232_37_5774
 2003_22_0950-9232_37_5792
 2003_22_0950-9232_37_5834
 2003_22_0950-9232_38_5927
 2003_22_0950-9232_40_6119
 2003_22_0950-9232_50_8063
 2003_23_0270-7306_10_3405
 2003_23_0270-7306_21_7488
 2003_23_0270-7306_3_791
 2003_278_0021-9258_17_14985
 2003_278_0021-9258_24_21767
 2003_278_0021-9258_27_24428
 2003_278_0021-9258_32_29824
 2003_278_0021-9258_34_31838
 2003_278_0021-9258_38_36163
 2003_278_0021-9258_43_42346
 2003_278_0021-9258_47_47326
 2003_284_0363-6143_2_C349
 2003_2_1535-7163_10_1053
 2003_2_1535-7163_11_1093
 2003_304_0006-291X_2_339
 2003_311_0006-291X_4_803
 2003_33_1061-4036_1_80
 2003_3_1474-175X_3_155
 2003_3_1535-6108_3_247
 2003_3_1535-6108_5_421
 2003_421_0028-0836_6926_952
 2003_421_0028-0836_6926_957
 2003_426_0028-0836_6962_87
 2003_42_0006-2960_34_10060
 2003_4_1469-221X_7_671
 2003_4_1469-221X_7_671
 2003_532_0027-5107_1-2_85
 2003_5_1465-7392_3_255
 2003_5_1465-7392_5_401
 2003_63_0008-5472_1_52
 2004_101_0027-8424_40_14443
 2004_101_0027-8424_40_14443
 2004_110_0020-7136_3_320
 2004_111_0020-7136_4_543
 2004_112_0020-7136_5_760
 2004_113_0009-5915_2_53
 2004_117_0021-9533_21_4979
 2004_117_0021-9533_25_6019
 2004_130_0171-5216_4_225
 2004_13_0964-6906_23_2937
 2004_14_0960-9822_1_23
 2004_18_0890-9369_10_1144
 2004_18_0890-9369_11_1331
 2004_18_0890-9369_17_2108
 2004_18_0890-9369_24_3041
 2004_23_0167-7659_3-4_209
 2004_23_0261-4189_13_2554
 2004_23_0261-4189_16_3386
 2004_23_0950-9232_11_2050
 2004_23_0950-9232_16_2825
 2004_23_0950-9232_25_4353
 2004_23_0950-9232_52_8411
 2004_23_0950-9232_52_8535
 2004_24_0270-7306_14_6350
 2004_24_0270-7306_21_9498
 2004_24_0270-7306_7_2720
 2004_279_0021-9258_10_8808
 2004_279_0021-9258_38_39636
 2004_279_0021-9258_42_43574
 2004_279_0021-9258_46_47652
 2004_279_0021-9258_7_6046
 2004_32_0305-1048_2_767
 2004_32_0305-1048_2_767
 2004_335_0022-2836_1_371
 2004_38_0065-227X__65
 2004_3_1568-7864_8-9_1025
 2004_3_1568-7864_8-9_845
 2004_3_1568-7864_8-9_953
 2004_3_1568-7864_8-9_997
 2004_40_0959-8049_17_2550
 2004_46_0165-0173_1_44
 2004_4_1474-175X_9_665
 2004_554_0027-5107_1-2_241
 2004_557_1383-5718_1_41
 2004_560_1383-5718_2_133
 2004_5_1471-0072_10_792
 2004_67_0006-2952_7_1373
 2004_6_1465-5411_6_R629
 2004_6_1465-7392_10_968
 2004_6_1465-7392_7_576
 2005_102_0027-8424_18_6279
 2005_113_0020-7136_4_575
 2005_118_0021-9533_8_1629
 2005_120_0092-8674_2_209
 2005_169_0021-9525_5_755
 2005_16_1059-1524_4_1684
 2005_16_1084-9521_3_355
 2005_16_1084-9521_3_369
 2005_24_0950-9232_18_2929
 2005_24_0950-9232_23_3786
 2005_24_0950-9232_2_299
 2005_25_0270-7306_6_2463
 2005_25_0270-7306_7_2853
 2005_280_0021-9258_9_8156
 2005_302_0014-4827_2_162
 2005_303_0014-4827_1_89
 2005_304_0014-4827_1_1
 2005_434_0028-0836_7033_598
 2005_43_0899-1987_1_1
 2005_45_0362-1642__725
 2005_48_0022-2623_6_1873
 2005_92_0007-0920_4_784
 2005_94_0730-2312_2_298
 
	Citances for PMID: 7523110
 1994_79_0092-8674_4_573
 1995_15_0270-7306_5_2612
 1995_7_0955-0674_6_773
 1995_7_0955-0674_6_773
 1995_7_0955-0674_6_815
 1995_80_0092-8674_2_225
 1995_92_0027-8424_17_7892
 1995_92_0027-8424_17_7892
 1996_110_0304-3835_1-2_193
 1996_172_0378-1119_2_261
 1996_178_0378-1119_1-2_111
 1996_24_0305-1048_9_1727
 1996_24_0305-1048_9_1727
 1996_271_0021-9258_44_27847
 1996_271_0021-9258_9_5118
 1996_31_0531-5565_1-2_13
 1996_57_0301-4622_2-3_239
 1997_1332_0304-419X_2_M53
 1997_138_0021-9525_5_1105
 1997_16_1350-9462_4_591
 1997_272_0021-9258_45_28607
 1997_272_0021-9258_52_32731
 1997_30_0362-546X_3_1825
 1997_410_0014-5793_1_11
 1997_89_0006-4971_11_4092
 1998_149_0016-6731_4_1867
 1998_17_0261-4189_16_4680
 1998_17_0261-4189_16_4680
 1998_18_0270-7306_4_1812
 1998_39_0040-4039_23_3995
 1998_93_0092-8674_4_617
 1999_10_1044-9523_6_413
 1999_146_0021-9525_3_573
 1999_18_0261-4189_3_654
 1999_18_0261-4189_3_654
 1999_18_0950-9232_19_2934
 1999_18_0950-9232_37_5159
 1999_18_0950-9232_3_573
 1999_18_0950-9232_50_6989
 1999_19_0270-7306_2_1460
 1999_19_0270-7306_6_4465
 1999_19_0270-7306_7_4695
 1999_19_0270-7306_9_6183
 1999_206_0012-1606_1_15
 1999_212_0012-1606_2_381
 1999_24_0968-0004_3_116
 1999_274_0021-9258_26_18659
 1999_277_0363-6127_2_F186
 1999_286_0022-2836_2_475
 1999_35_0959-8049_9_1388
 1999_56_0085-2538_4_1193
 1999_79_0301-4622_2_95
 1999_84_0009-7330_7_820
 1999_84_0009-7330_7_820
 1999_9_0960-894X_19_2849
 1999_9_0960-9822_1_1
 2000_106_0021-9738_6_753
 2000_106_0021-9738_6_753
 2000_10_0960-894X_22_2571
 2000_10_0960-894X_7_615
 2000_14_0890-9369_18_2265
 2000_155_0016-6731_1_233
 2000_157_0002-9440_6_1983
 2000_19_0950-9232_10_1257
 2000_19_0950-9232_20_2447
 2000_19_0950-9232_36_4184
 2000_19_0950-9232_39_4480
 2000_19_0950-9232_47_5314
 2000_1_1469-221X_1_71
 2000_1_1469-221X_1_71
 2000_20_0270-7306_10_3497
 2000_224_0012-1606_2_388
 2000_256_0014-4827_2_347
 2000_257_0014-4827_1_145
 2000_257_0014-4827_1_206
 2000_275_0021-9258_23_17821
 2000_275_0021-9258_37_28849
 2000_275_0021-9258_49_38384
 2000_278_0006-291X_1_229
 2000_288_0036-8075_5470_1425
 2000_41_0040-4039_13_2111
 2000_465_0014-5793_1_8
 2000_60_0008-5472_11_3043
 2000_60_0008-5472_5_1317
 2000_62_0006-3363_3_519
 2000_62_0006-3363_3_519
 2000_6_1078-0432_12_4859
 2000_87_0009-7330_7_608
 2000_89_0020-7136_2_148
 2000_8_0968-0896_2_299
 2000_97_0027-8424_16_9042
 2000_97_0027-8424_16_9042
 2001_101_0009-2665_8_2313
 2001_105_0306-4522_3_639
 2001_117_0022-202X_1_132
 2001_12_1043-2760_7_320
 2001_177_0303-7207_1-2_25
 2001_20_0950-9232_33_4542
 2001_20_0950-9232_5_543
 2001_21_0270-7306_12_3853
 2001_21_0270-7306_23_8056
 2001_21_0270-7306_3_794
 2001_21_0270-7306_7_2435
 2001_276_0021-9258_1_835
 2001_276_0021-9258_25_22404
 2001_276_0021-9258_46_42971
 2001_289_0003-2697_1_43
 2001_305_0302-766X_2_217
 2001_410_0028-0836_6830_842
 2001_44_0022-2623_20_3216
 2001_44_0022-2623_24_4042
 2001_44_0022-2623_5_834
 2001_61_0008-5472_7_3188
 2002_100_0006-4971_10_3804
 2002_124_0002-7863_44_13171
 2002_129_0950-1991_9_2155
 2002_1_1474-1776_12_961
 2002_1_1535-7163_9_695
 2002_21_0261-4189_14_3694
 2002_21_0261-4189_14_3694
 2002_21_0261-4189_18_4875
 2002_21_0261-4189_18_4875
 2002_21_0261-4189_21_5911
 2002_21_0261-4189_21_5911
 2002_21_0950-9232_50_7630
 2002_22_0270-7306_7_2242
 2002_277_0021-9258_22_19470
 2002_277_0021-9258_38_35176
 2002_277_0021-9258_44_41686
 2002_277_0021-9258_49_46877
 2002_299_0378-1119_1-2_35
 2002_34_0899-1987_1_45
 2002_76_0022-538X_2_619
 2002_76_0022-538X_2_619
 2002_99_0027-8424_23_14795
 2002_99_0027-8424_23_14795
 2003_100_0027-8424_26_15548
 2003_100_0027-8424_26_15548
 2003_14_1059-1524_7_2984
 2003_17_0890-9369_24_3062
 2003_22_0261-4189_18_4794
 2003_22_0261-4189_18_4794
 2003_22_0950-9232_2_220
 2003_22_0950-9232_40_6119
 2003_23_0270-7306_19_6936
 2003_23_0270-7306_21_7488
 2003_278_0021-9258_24_21767
 2003_278_0021-9258_32_29824
 2003_278_0021-9258_34_31838
 2003_278_0021-9258_37_35241
 2003_278_0021-9258_52_52572
 2003_284_0363-6143_2_C349
 2003_2_1535-7163_10_1053
 2003_4_1469-221X_7_671
 2003_4_1469-221X_7_671
 2003_72_0024-3205_24_2769
 2003_85_0006-3495_6_3600
 2004_101_0027-8424_40_14443
 2004_101_0027-8424_40_14443
 2004_11_1350-9047_1_80
 2004_14_0960-894X_12_3291
 2004_14_0960-894X_16_4339
 2004_14_0960-894X_7_1673
 2004_18_0890-9369_11_1331
 2004_23_0261-4189_16_3386
 2004_23_0950-9232_11_2050
 2004_23_0950-9232_1_71
 2004_279_0021-9258_39_40927
 2004_279_0021-9258_46_47652
 2004_316_0006-291X_1_226
 2004_319_0006-291X_2_464
 2004_41_0896-6273_4_549
 2004_66_0026-895X_4_824
 2004_67_0006-2952_7_1373
 2005_15_0960-894X_1_61
 2005_204_0021-9541_2_437
 2005_24_0950-9232_17_2877
 2005_24_0950-9232_2_299
 2005_25_0270-7306_7_2853
 2005_25_0270-7306_8_3364
 2005_280_0021-9258_16_15673
 2005_280_0021-9258_23_21731
 2005_303_0014-4827_1_89
 2005_44_1433-7851_25_3814
 2005_45_0362-1642__725
 2005_47_0012-1592_5_283
 
	Citances for PMID: 8156993
 1994_48_0006-2952_11_2139
 1994_79_0092-8674_4_573
 1995_15_0270-7306_5_2612
 1995_7_0955-0674_6_773
 1995_7_0955-0674_6_773
 1995_7_0955-0674_6_815
 1995_80_0092-8674_2_225
 1995_92_0027-8424_17_7892
 1995_92_0027-8424_17_7892
 1996_110_0304-3835_1-2_193
 1996_172_0378-1119_2_261
 1996_178_0378-1119_1-2_111
 1996_271_0021-9258_9_5118
 1996_6_0960-9822_12_1553
 1997_1332_0304-419X_2_M53
 1997_138_0021-9525_3_643
 1997_138_0021-9525_5_1105
 1997_254_0003-2697_2_231
 1997_272_0021-9258_45_28607
 1997_272_0021-9258_52_32731
 1997_410_0014-5793_1_11
 1997_5_0968-0896_1_165
 1998_149_0016-6731_4_1867
 1998_17_0261-4189_16_4680
 1998_17_0261-4189_16_4680
 1998_18_0270-7306_12_7487
 1998_18_0270-7306_4_1812
 1998_273_0021-9258_22_13966
 1998_273_0021-9258_50_33279
 1998_39_0040-4039_23_3995
 1998_3_1356-9597_8_549
 1998_93_0092-8674_4_617
 1998_9_1059-1524_6_1577
 1999_10_1044-9523_6_413
 1999_146_0021-9525_3_573
 1999_18_0950-9232_17_2770
 1999_18_0950-9232_19_2934
 1999_18_0950-9232_32_4564
 1999_18_0950-9232_37_5159
 1999_18_0950-9232_3_565
 1999_18_0950-9232_3_573
 1999_18_0950-9232_50_6989
 1999_19_0270-7306_1_916
 1999_19_0270-7306_2_1460
 1999_19_0270-7306_5_3829
 1999_19_0270-7306_7_4695
 1999_19_0270-7306_7_4819
 1999_19_0270-7306_9_6183
 1999_206_0012-1606_1_15
 1999_212_0012-1606_2_381
 1999_213_0012-1606_1_54
 1999_260_0006-291X_2_510
 1999_274_0021-9258_26_18659
 1999_274_0021-9258_35_24445
 1999_277_0363-6127_2_F186
 1999_27_0301-472X_2_203
 1999_286_0022-2836_2_475
 1999_56_0085-2538_4_1193
 1999_84_0009-7330_7_820
 1999_84_0009-7330_7_820
 1999_96_0027-8424_23_13197
 1999_96_0027-8424_23_13197
 1999_96_0027-8424_7_4180
 1999_96_0027-8424_7_4180
 1999_9_0960-894X_19_2849
 1999_9_0960-9822_1_1
 2000_106_0021-9738_6_753
 2000_106_0021-9738_6_753
 2000_10_0960-894X_22_2571
 2000_10_0960-894X_7_615
 2000_11_1044-9523_5_269
 2000_1494_0167-4781_3_242
 2000_14_0890-9369_18_2265
 2000_155_0016-6731_1_233
 2000_157_0002-9440_6_1983
 2000_19_0950-9232_10_1257
 2000_19_0950-9232_20_2447
 2000_19_0950-9232_36_4184
 2000_19_0950-9232_39_4480
 2000_19_0950-9232_47_5314
 2000_19_0950-9232_56_6607
 2000_19_0950-9232_5_690
 2000_1_1469-221X_1_71
 2000_1_1469-221X_1_71
 2000_20_0270-7306_10_3497
 2000_224_0012-1606_2_388
 2000_257_0014-4827_1_206
 2000_275_0021-9258_15_11270
 2000_275_0021-9258_28_21203
 2000_275_0021-9258_37_28849
 2000_288_0036-8075_5470_1425
 2000_33_0168-8278_2_266
 2000_41_0040-4039_13_2111
 2000_465_0014-5793_1_8
 2000_60_0008-5472_16_4531
 2000_62_0006-3363_3_519
 2000_62_0006-3363_3_519
 2000_87_0009-7330_7_608
 2000_89_0020-7136_2_148
 2000_8_0968-0896_2_299
 2000_97_0027-8424_16_9042
 2000_97_0027-8424_16_9042
 2001_101_0009-2665_8_2313
 2001_173_0304-3835_2_187
 2001_20_0950-9232_33_4542
 2001_21_0270-7306_12_3853
 2001_21_0270-7306_14_4818
 2001_21_0270-7306_18_6332
 2001_21_0270-7306_23_8056
 2001_21_0270-7306_3_794
 2001_21_0270-7306_7_2435
 2001_276_0021-9258_46_42971
 2001_289_0003-2697_1_43
 2001_305_0302-766X_2_217
 2001_333_0076-6879__127
 2001_410_0028-0836_6830_842
 2001_44_0022-2623_24_4042
 2001_44_0022-2623_5_834
 2001_61_0008-5472_19_7211
 2001_61_0008-5472_7_3188
 2001_62_0006-2952_5_593
 2001_80_0090-8258_2_168
 2001_80_0730-2312_3_328
 2002_100_0006-4971_10_3804
 2002_13_1059-1524_6_1977
 2002_13_1359-6101_3_259
 2002_193_0021-9541_3_263
 2002_1_1474-1776_12_961
 2002_21_0261-4189_18_4875
 2002_21_0261-4189_18_4875
 2002_21_0261-4189_21_5911
 2002_21_0261-4189_21_5911
 2002_21_0950-9232_50_7630
 2002_277_0021-9258_22_19470
 2002_277_0021-9258_49_46877
 2002_299_0378-1119_1-2_35
 2002_61_0026-895X_4_720
 2002_76_0022-538X_2_619
 2002_76_0022-538X_2_619
 2002_7_1359-6446_19_1013
 2002_86_0007-0920_3_402
 2002_99_0027-8424_23_14795
 2002_99_0027-8424_23_14795
 2003_100_0027-8424_26_15548
 2003_100_0027-8424_26_15548
 2003_14_1059-1524_7_2984
 2003_1_1541-7786_4_300
 2003_22_0950-9232_2_220
 2003_22_0950-9232_40_6119
 2003_22_0950-9232_50_8063
 2003_23_0270-7306_19_6936
 2003_23_0270-7306_21_7488
 2003_23_0270-7306_24_9303
 2003_278_0021-9258_32_29824
 2003_278_0021-9258_34_31838
 2003_278_0021-9258_37_35241
 2003_278_0021-9258_52_52572
 2003_285_0014-4827_1_99
 2003_2_1535-7163_10_1053
 2003_33_1061-4036_1_80
 2003_4_1469-221X_7_671
 2003_4_1469-221X_7_671
 2003_9_1078-0432_5_1764
 2004_101_0027-8424_40_14443
 2004_101_0027-8424_40_14443
 2004_11_1350-9047_1_80
 2004_14_0960-894X_12_3291
 2004_14_0960-894X_16_4339
 2004_23_0261-4189_16_3386
 2004_23_0950-9232_11_2050
 2004_23_0950-9232_19_3284
 2004_279_0021-9258_14_13755
 2004_309_0022-3565_1_64
 2004_67_0006-2952_7_1373
 2004_68_0006-2952_11_2221
 2004_68_1092-2172_2_362
 2005_15_0960-894X_1_61
 2005_169_0021-9525_5_755
 2005_204_0021-9541_2_437
 2005_24_0950-9232_17_2877
 2005_25_0270-7306_7_2853
 2005_25_0270-7306_8_3338
 2005_303_0014-4827_1_89
 2005_434_0028-0836_7033_598
 2005_45_0362-1642__725
 2005_47_0012-1592_5_283
 
	Citances for PMID: 1384126
 1993_5_0898-6568_4_381
 1993_74_0092-8674_3_463
 1993_75_0092-8674_1_155
 1993_75_0092-8674_4_791
 1993_90_0027-8424_8_3521
 1993_90_0027-8424_8_3521
 1994_1198_0304-419X_2-3_215
 1994_1198_0304-419X_2-3_215
 1994_1221_0167-4889_1_73
 1994_33_0303-2647_3_203
 1994_68_0022-538X_4_2355
 1995_16_0197-4580_3_263
 1995_270_0021-9258_18_10847
 1995_270_0021-9258_41_24540
 1995_270_0021-9258_43_25872
 1995_86_0006-4971_3_841
 1995_92_0027-8424_21_9638
 1996_271_0021-9258_10_5443
 1996_271_0021-9258_11_6389
 1996_271_0021-9258_44_27517
 1996_271_0021-9258_44_27847
 1996_58_0925-4773_1-2_75
 1996_6_0960-9822_12_1609
 1996_8_0955-0674_6_795
 1996_8_0955-0674_6_795
 1996_93_0027-8424_1_352
 1997_138_0021-9525_5_1105
 1997_16_0261-4189_1_182
 1997_16_0261-4189_1_182
 1997_230_0006-291X_2_262
 1997_236_0006-291X_1_130
 1997_236_0014-4827_1_4
 1997_272_0021-9258_20_13320
 1997_272_0021-9258_35_22300
 1997_29_1357-2725_7_951
 1997_31_0197-0186_4_617
 1997_80_0008-543X_4_753
 1998_12_0890-9369_16_2549
 1998_1443_0167-4781_3_275
 1998_17_0261-4189_17_5037
 1998_17_0261-4189_17_5037
 1998_18_0270-7306_7_3782
 1998_23_0143-4160_2-3_123
 1998_273_0021-9258_46_30777
 1998_273_0021-9258_50_33455
 1998_273_0021-9258_8_4666
 1998_92_0006-4971_5_1685
 1999_10_1059-1524_11_3607
 1999_13_0890-9369_5_620
 1999_18_0950-9232_1_269
 1999_19_0270-7306_6_4465
 1999_19_0270-7306_7_5113
 1999_19_0270-7306_9_5872
 1999_206_0012-1606_1_15
 1999_234_0378-1119_2_209
 1999_274_0021-9258_45_31775
 1999_38_0006-2960_27_8713
 1999_82_0020-7136_6_868
 1999_96_0027-8424_7_4180
 1999_96_0027-8424_7_4180
 1999_9_0960-9822_1_1
 2000_100_0092-8674_6_681
 2000_11_1044-9523_4_211
 2000_157_0002-9440_6_1983
 2000_19_0950-9232_24_2855
 2000_20_0270-7306_12_4210
 2000_227_0012-1606_2_706
 2000_74_0022-538X_1_8
 2000_74_0022-538X_1_8
 2001_12_1044-9523_12_581
 2001_20_0950-9232_15_1803
 2001_20_0950-9232_15_1839
 2001_276_0021-9258_21_17914
 2001_276_0021-9258_3_1998
 2001_276_0021-9258_46_42971
 2001_276_0021-9258_8_5570
 2001_289_0003-2697_1_43
 2001_31_0899-1987_3_111
 2001_61_0008-5472_22_8211
 2002_116_0007-1048_2_421
 2002_119_0007-1048_4_956
 2002_141_0009-2797_3_211
 2002_14_0898-6568_5_467
 2002_21_0950-9232_11_1717
 2002_277_0021-9258_10_8730
 2002_33_0899-1987_1_36
 2002_76_0022-538X_19_10030
 2002_76_0022-538X_19_10030
 2002_76_0022-538X_19_9763
 2002_76_0022-538X_19_9763
 2002_9_1097-2765_5_993
 2003_100_0027-8424_5_2284
 2003_100_0027-8424_5_2284
 2003_116_0021-9533_24_4883
 2003_13_0960-8931_2_119
 2003_159_0033-7587_1_72
 2003_202_0304-3835_2_201
 2003_22_0950-9232_37_5834
 2003_278_0021-9258_28_25277
 2003_278_0021-9258_45_44645
 2003_302_0036-8075_5643_255
 2003_36_0899-1987_4_171
 2003_42_1433-7851_19_2122
 2004_117_0021-9533_21_4979
 2004_117_0021-9533_6_967
 2004_23_0167-7659_3-4_209
 2005_13_0969-2126_4_541
 2005_16_1059-1524_3_1305
 2005_1729_0167-4781_1_1
 2005_19_0890-9369_10_1162
 2005_24_0950-9232_2_217
 
	Citances for PMID: 11251070
 2001_11_0962-8924_12_512
 2001_12_1044-9523_12_581
 2001_276_0021-9258_52_48863
 2002_115_0021-9533_18_3609
 2002_161_0016-6731_2_721
 2002_21_0261-4189_10_2472
 2002_21_0261-4189_10_2472
 2002_21_0261-4189_14_3694
 2002_21_0261-4189_14_3694
 2002_21_0261-4189_15_4012
 2002_21_0261-4189_15_4012
 2002_277_0021-9258_30_27088
 2002_36_0066-4197__617
 2003_100_0027-8424_3_975
 2003_100_0027-8424_3_975
 2003_116_0021-9533_24_4883
 2003_120_0925-4773_3_315
 2003_165_0016-6731_4_1717
 2003_218_0032-0935_1_50
 2003_22_0950-9232_37_5834
 2003_23_0270-7306_21_7488
 2003_36_0899-1987_4_171
 2003_3_1474-175X_12_931
 2003_5_1465-7392_2_161
 2003_77_0022-538X_2_1257
 2003_77_0022-538X_2_1257
 2004_117_0021-9533_14_3011
 2004_131_0950-1991_3_571
 2004_23_0167-7659_3-4_209
 2004_23_0261-4189_16_3386
 2004_279_0021-9258_10_8808
 2004_279_0021-9258_30_31164
 2004_37_0022-2828_3_633
 2004_78_0022-538X_15_8183
 2004_78_0022-538X_15_8183
 2005_13_0969-2126_4_541
 2005_16_1059-1524_4_1735
 2005_25_0270-7306_13_5725
 2005_79_0022-538X_5_2780
 
	Citances for PMID: 11030344
 2000_6_1097-2765_3_649
 2001_10_0964-6906_5_519
 2001_10_0964-6906_5_519
 2001_11_0960-9822_15_1221
 2001_13_0955-0674_2_225
 2001_13_0955-0674_2_225
 2001_13_0955-0674_6_738
 2001_15_0892-6638_7_1132
 2001_276_0021-9258_20_17092
 2001_276_0021-9258_28_26715
 2001_8_1097-2765_1_137
 2002_100_0006-4971_10_3804
 2002_13_1059-1524_5_1462
 2002_21_0261-4189_21_5911
 2002_21_0261-4189_21_5911
 2002_296_0006-291X_2_363
 2002_33_0899-1987_1_1
 2002_36_0066-4197__617
 2003_100_0027-8424_19_10758
 2003_100_0027-8424_19_10758
 2003_159_0033-7587_2_139
 2003_163_0021-9525_2_245
 2003_22_0950-9232_37_5834
 2003_278_0021-9258_3_1443
 2003_31_0305-1048_24_7227
 2003_31_0305-1048_24_7227
 2003_3_1535-6108_3_247
 2003_532_0027-5107_1-2_29
 2004_117_0021-9533_25_6019
 2004_131_0950-1991_8_1703
 2004_315_0006-291X_1_51
 2004_3_1568-7864_8-9_997
 2004_5_1471-0072_10_792
 2004_6_1465-7392_7_648
 2005_25_0270-7306_13_5363
 2005_25_0270-7306_6_2463
 2005_94_0730-2312_2_298
 
	Citances for PMID: 11005825
 2001_276_0021-9258_20_17092
 2002_13_1059-1524_5_1462
 2002_159_0021-9525_4_541
 2002_161_0016-6731_1_47
 2002_21_0261-4189_9_2168
 2002_21_0261-4189_9_2168
 2002_22_0270-7306_13_4477
 2002_273_0014-4827_1_54
 2002_99_0027-8424_25_16087
 2002_99_0027-8424_25_16087
 2003_100_0027-8424_23_13241
 2003_100_0027-8424_23_13241
 2003_100_0027-8424_5_2334
 2003_100_0027-8424_5_2334
 2003_22_0261-4189_10_2526
 2003_22_0261-4189_10_2526
 2003_532_0027-5107_1-2_29
 2003_8_1356-9597_2_145
 2004_113_0009-5915_3_145
 2004_117_0021-9533_21_4897
 2004_117_0021-9533_25_6019
 2004_23_0261-4189_18_3667
 2004_24_0270-7306_14_6268
 2004_279_0021-9258_44_45586
 2005_19_0890-9369_9_1040
 
	Citances for PMID: 11739726
 2005_5_1474-175X_2_135
 2005_83_0021-8812_1_89
 
	Citances for PMID: 11864598
 2002_159_0021-9525_4_541
 2003_100_0027-8424_23_13241
 2003_100_0027-8424_23_13241
 2003_100_0027-8424_5_2334
 2003_100_0027-8424_5_2334
 2003_1638_0925-4439_2_179
 2003_17_0890-9369_9_1141
 2003_22_0261-4189_10_2526
 2003_22_0261-4189_10_2526
 2003_31_0305-1048_6_1725
 2003_31_0305-1048_6_1725
 2003_8_1356-9597_5_451
 2004_101_0027-8424_27_10078
 2004_101_0027-8424_27_10078
 2004_113_0009-5915_3_145
 2004_16_1097-2765_2_173
 2004_23_0261-4189_18_3667
 2004_23_0950-9232_37_6250
 2005_121_0092-8674_6_887
 2005_7_1462-5814_2_259
 
	Citances for PMID: 10692433
 2001_11_1054-1500_1_269
 2001_13_1040-8746_2_129
 2001_20_0950-9232_5_543
 2001_282_0006-291X_1_278
 2001_490_0014-5793_3_117
 2001_59_1096-6080_1_185
 2001_61_0008-5472_16_6170
 2002_13_1059-1524_5_1462
 2002_21_0950-9232_30_4626
 2002_22_0270-7306_16_5650
 2002_277_0021-9258_3_2302
 2002_64_0006-2952_7_1091
 2004_109_0020-7136_5_643
 2004_16_1040-4651_1_99
 2004_23_0950-9232_6_1263
 2004_36_1357-2725_8_1424
 2005_24_0950-9232_17_2877
 
	Citances for PMID: 11850621
 2002_16_0890-9369_17_2173
 2002_16_0890-9369_24_3236
 2002_21_0261-4189_18_4875
 2002_21_0261-4189_18_4875
 2002_21_0950-9232_58_8967
 2002_22_0270-7306_24_8552
 2002_3_1471-0072_5_317
 2002_509_0027-5107_1-2_49
 2003_13_0960-9822_12_R488
 2003_160_0033-7587_3_273
 2003_193_0300-483X_1-2_111
 2003_1_1541-7786_9_674
 2003_22_0261-4189_20_5612
 2003_22_0261-4189_20_5612
 2003_22_0261-4189_24_6610
 2003_22_0261-4189_24_6610
 2003_22_0950-9232_28_4398
 2003_22_0950-9232_37_5755
 2003_22_0950-9232_37_5774
 2003_22_0950-9232_37_5792
 2003_22_0950-9232_37_5834
 2003_22_0950-9232_40_6119
 2003_23_0270-7306_18_6564
 2003_23_0270-7306_3_791
 2003_278_0021-9258_11_9309
 2003_278_0021-9258_17_14806
 2003_278_0021-9258_24_21767
 2003_278_0021-9258_24_21944
 2003_278_0021-9258_38_36163
 2003_278_0021-9258_47_47326
 2003_2_1535-7163_7_651
 2003_33_1061-4036_1_80
 2003_3_1474-175X_3_155
 2003_3_1535-6108_3_247
 2003_3_1535-6108_5_421
 2003_421_0028-0836_6926_952
 2003_426_0028-0836_6962_87
 2003_4_1469-221X_7_671
 2003_4_1469-221X_7_671
 2003_4_1469-221X_9_844
 2003_4_1469-221X_9_844
 2003_532_0027-5107_1-2_41
 2003_5_1465-7392_3_255
 2003_63_0008-5472_10_2440
 2003_63_0009-9163_4_283
 2004_113_0009-5915_2_53
 2004_117_0021-9533_21_4979
 2004_130_0171-5216_4_225
 2004_13_0964-6906_20_2385
 2004_13_0964-6906_23_2937
 2004_14_0959-437X_1_11
 2004_14_0959-437X_3_292
 2004_161_0033-7587_3_247
 2004_18_0890-9369_17_2108
 2004_23_0261-4189_17_3548
 2004_23_0261-4189_5_1178
 2004_24_0270-7306_10_4151
 2004_24_0270-7306_16_7082
 2004_24_0270-7306_20_9207
 2004_24_0270-7306_2_708
 2004_279_0021-9258_19_20067
 2004_279_0021-9258_27_28574
 2004_279_0021-9258_37_38813
 2004_279_0021-9258_7_6046
 2004_32_0305-1048_2_767
 2004_32_0305-1048_2_767
 2004_38_0065-227X__65
 2004_3_1568-7864_8-9_1207
 2004_3_1568-7864_8-9_1219
 2004_3_1568-7864_8-9_845
 2004_3_1568-7864_8-9_855
 2004_3_1568-7864_8-9_953
 2004_3_1568-7864_8-9_997
 2004_40_0959-8049_17_2550
 2004_41_1045-2257_2_133
 2004_432_0028-0836_7015_316
 2004_46_0165-0173_1_44
 2004_554_0027-5107_1-2_241
 2004_5_1471-0072_10_792
 2005_10_1356-9597_2_97
 2005_118_0021-9533_8_1629
 2005_16_1084-9521_3_355
 2005_170_0021-9525_2_201
 2005_19_0890-9369_6_671
 2005_25_0270-7306_7_2853
 2005_280_0021-9258_23_22343
 2005_280_0021-9258_9_8156
 2005_302_0014-4827_2_162
 2005_314_0022-3565_2_495
 2005_434_0028-0836_7033_605
 2005_7_1465-7392_7_675
 
	Citances for PMID: 10491086
 2001_21_0270-7306_12_4032
 2002_294_0006-291X_1_120
 2002_30_0305-1048_7_1664
 2002_30_0305-1048_7_1664
 2002_76_0022-538X_19_9806
 2002_76_0022-538X_19_9806
 2003_8_1356-9597_2_145
 2005_10_1356-9597_1_63
 
	Citances for PMID: 10805723
 2000_1_1469-221X_4_319
 2000_1_1469-221X_4_319
 2001_21_0270-7306_15_5071
 2001_264_0378-1119_2_249
 2001_29_0305-1048_7_1433
 2001_29_0305-1048_7_1433
 2002_161_0016-6731_1_47
 2002_1_1535-9778_1_1
 2002_21_0950-9232_51_7786
 2002_22_0270-7306_13_4477
 2002_99_0027-8424_25_16087
 2002_99_0027-8424_25_16087
 2002_9_1097-2765_5_1067
 2003_532_0027-5107_1-2_21
 2003_532_0027-5107_1-2_29
 2004_113_0009-5915_3_145
 2004_16_1040-4651_1_99
 2004_18_0890-9369_9_981
 
	Citances for PMID: 10757793
 2000_1_1469-221X_4_319
 2000_1_1469-221X_4_319
 2001_11_0960-9822_23_R979
 2001_20_0261-4189_5_1086
 2001_20_0261-4189_5_1086
 2001_264_0378-1119_2_249
 2001_98_0027-8424_9_4978
 2001_98_0027-8424_9_4978
 2002_10_1097-2765_5_1223
 2002_13_1059-1524_5_1462
 2002_159_0021-9525_4_541
 2002_161_0016-6731_1_47
 2002_16_0890-9369_2_183
 2002_21_0261-4189_9_2168
 2002_21_0261-4189_9_2168
 2002_21_0950-9232_51_7786
 2002_22_0270-7306_13_4477
 2002_99_0027-8424_25_16087
 2002_99_0027-8424_25_16087
 2003_11_1097-2765_5_1323
 2003_17_0890-9369_9_1153
 2003_22_0261-4189_10_2526
 2003_22_0261-4189_10_2526
 2003_35_1061-4036_1_25
 2003_44_0172-8083_1_38
 2003_8_1356-9597_2_145
 2004_113_0009-5915_3_145
 2004_15_1059-1524_5_2230
 2004_16_1040-4651_1_99
 2004_16_1097-2765_2_173
 2004_23_0261-4189_18_3667
 2004_23_0261-4189_3_670
 2004_23_0950-9232_37_6250
 2004_24_0270-7306_17_7419
 2004_24_0270-7306_5_1930
 2004_24_0270-7306_6_2277
 2004_279_0021-9258_38_39636
 2004_340_0022-2836_2_195
 2004_36_1357-2725_8_1424
 2005_121_0092-8674_6_887
 2005_168_0021-9525_6_875
 2005_24_0950-9232_17_2877
 2005_56_1040-2519__393
 
	Citances for PMID: 11602595
 2003_278_0021-9258_44_43586
 2003_8_1356-9597_5_451
 2004_16_1097-2765_2_173
 
	Citances for PMID: 12604790
 2003_100_0027-8424_5_2334
 2003_100_0027-8424_5_2334
 2004_16_1097-2765_2_173
 2004_340_0022-2836_2_195
 2005_25_0270-7306_7_2770
 
	Citances for PMID: 12535533
 2003_13_0962-8924_9_493
 2003_163_0021-9525_2_245
 2003_22_0261-4189_16_4325
 2003_22_0261-4189_16_4325
 2003_300_0036-8075_5625_1542
 2003_532_0027-5107_1-2_173
 2003_532_0027-5107_1-2_215
 2003_532_0027-5107_1-2_21
 2003_532_0027-5107_1-2_29
 2003_532_0027-5107_1-2_41
 2004_101_0027-8424_30_10845
 2004_117_0021-9533_21_4897
 2004_118_0092-8674_6_699
 2004_146_1047-8477_1-2_234
 2004_14_0959-437X_3_292
 2004_167_0016-6731_4_1597
 2004_16_0955-0674_3_328
 2004_23_0261-4189_5_1178
 2004_279_0021-9258_19_20067
 2004_279_0021-9258_32_34010
 2004_279_0021-9258_48_49599
 2004_3_1568-7864_8-9_1227
 2004_3_1568-7864_8-9_901
 2004_3_1568-7864_8-9_997
 2004_432_0028-0836_7015_316
 2004_5_1471-0072_10_792
 2004_5_1535-6108_3_275
 2004_6_1465-7392_7_648
 2004_78_0022-538X_4_1605
 2004_78_0022-538X_4_1605
 2005_24_0950-9232_18_3020
 2005_24_0950-9232_29_4728
 2005_280_0021-9258_13_13062
 2005_280_0021-9258_23_22343
 2005_579_0014-5793_1_157
 2005_87_0300-9084_7_579
 
	Citances for PMID: 10681582
 2003_31_0305-1048_14_4162
 2003_31_0305-1048_14_4162
 2004_117_0021-9533_11_2411
 
	Citances for PMID: 10783164
 2001_159_0016-6731_2_471
 2002_277_0021-9258_13_11174
 2003_1638_0925-4439_2_179
 2003_17_0890-9369_9_1141
 2003_22_0261-4189_22_6148
 2003_22_0261-4189_22_6148
 2004_101_0027-8424_27_10078
 2004_101_0027-8424_27_10078
 2004_16_1097-2765_2_173
 2004_23_0950-9232_37_6250
 2004_340_0022-2836_2_195
 
	Citances for PMID: 10954718
 
	Citances for PMID: 11486016
 2002_13_1059-1524_5_1462
 2002_160_0016-6731_4_1305
 2002_16_0890-9369_24_3236
 2003_113_0092-8674_1_2
 2003_22_0950-9232_28_4301
 2004_24_0270-7306_17_7419
 2005_16_1059-1524_1_421
